# Supplementary material for: Cigarette smoking prevalence in US counties: 1996-2012
Source: Popul Health Metr. 2014 Mar 24;12:5. doi: 10.1186/1478-7954-12-5 (PMC3987818; doi:10.1186/1478-7954-12-5)
Supplement: Additional file 4 — Age-standardized daily cigarette smoking prevalence, all counties, 1996-2012. [file 1478-7954-12-5-S4.xlsx]

## Sheet: appendix_table_4_daily_smoking_
Additional File 4: Cigarette smoking prevalence in US counties: 1996-2012
Age-standardized daily cigarette smoking prevalence, all counties, 1996-2012
County	Sex	1996	1997	1998	1999	2000	2001	2002	2003	2004	2005	2006	2007	2008	2009	2010	2011	2012	Annualized rate of change, 1996-2012
Aleutians East Borough, AK	Male	26.8 (22.7,31.2)	25.8 (21.8,30.0)	25.4 (21.3,29.5)	25.6 (21.5,29.8)	25.4 (21.0,29.7)	25.3 (21.3,29.5)	23.8 (20.4,27.2)	25.6 (22.1,29.4)	26.5 (23.2,30.1)	25.5 (22.0,29.3)	26.0 (22.7,29.7)	25.9 (22.6,29.6)	24.5 (21.2,28.1)	20.2 (16.9,23.8)	19.8 (15.7,24.3)	17.7 (14.4,21.8)	16.7 (13.5,20.6)	-3.0 (-4.8,-1.4)
	Female	23.9 (18.7,29.9)	23.7 (18.9,29.2)	23.7 (19.0,28.7)	23.8 (19.2,28.8)	24.9 (20.4,29.9)	27.5 (23.1,32.3)	25.1 (21.0,29.4)	23.9 (20.1,28.0)	22.5 (19.2,26.2)	20.9 (18.0,24.0)	18.6 (16.0,21.8)	18.6 (15.5,22.2)	20.9 (17.3,25.0)	17.1 (12.8,21.8)	17.2 (12.7,21.7)	15.6 (12.1,20.0)	14.6 (11.3,18.7)	-3.1 (-5.5,-1.0)
	Both	25.4 (20.8,30.5)	24.8 (20.4,29.5)	24.5 (20.2,29.1)	24.7 (20.4,29.3)	25.2 (20.7,29.7)	26.4 (22.2,30.7)	24.4 (20.8,28.4)	24.8 (21.2,28.5)	24.5 (21.2,28.1)	23.2 (20.0,26.7)	22.3 (19.4,25.6)	22.2 (19.2,25.7)	22.6 (19.3,26.4)	18.6 (15.3,22.3)	18.5 (15.3,22.5)	16.6 (13.3,20.8)	15.6 (12.4,19.6)	-3.0 (-5.1,-1.1)
Aleutians West Census Area, AK	Male	28.2 (24.4,32.8)	27.1 (23.6,31.4)	26.4 (22.8,30.8)	26.4 (22.9,30.8)	26.0 (22.2,30.3)	27.6 (23.9,32.3)	25.9 (22.6,29.7)	27.9 (24.7,31.7)	28.8 (25.7,32.4)	27.1 (23.8,30.9)	27.8 (24.7,31.3)	29.1 (25.8,32.8)	25.7 (22.7,29.1)	22.8 (19.7,26.5)	21.0 (16.9,25.4)	19.4 (15.9,23.0)	18.4 (15.0,21.8)	-2.7 (-4.2,-1.3)
	Female	22.3 (17.9,28.3)	22.0 (17.7,27.2)	21.5 (17.7,26.6)	23.2 (19.5,28.3)	24.9 (20.8,30.0)	26.5 (22.5,31.2)	25.6 (21.9,30.0)	24.8 (21.6,28.7)	23.8 (20.8,27.3)	22.0 (19.3,25.1)	20.5 (17.7,23.5)	20.0 (16.8,23.2)	19.4 (15.9,23.0)	16.7 (12.5,20.9)	17.3 (13.0,21.5)	18.0 (14.0,22.1)	17.0 (13.3,21.0)	-1.7 (-3.7,0.2)
	Both	25.2 (21.1,30.3)	24.5 (20.7,29.3)	23.9 (20.3,28.5)	24.8 (21.1,29.5)	25.5 (21.6,30.0)	27.1 (23.2,31.7)	25.7 (22.2,29.9)	26.4 (23.0,30.1)	26.3 (23.2,29.8)	24.5 (21.7,27.8)	24.1 (21.2,27.2)	24.4 (21.5,27.7)	22.5 (19.3,25.7)	19.7 (16.4,23.1)	19.1 (15.7,22.7)	18.7 (15.0,22.5)	17.7 (14.2,21.4)	-2.2 (-3.9,-0.6)
Anchorage Municipality, AK	Male	21.0 (18.8,23.3)	20.1 (18.1,22.2)	19.5 (17.5,21.6)	18.7 (16.7,20.7)	18.3 (16.3,20.3)	18.4 (16.5,20.5)	19.6 (17.8,21.5)	19.6 (18.0,21.3)	19.3 (17.8,20.7)	18.0 (16.4,19.5)	17.0 (15.8,18.2)	15.4 (14.3,16.7)	14.4 (13.2,15.7)	14.3 (12.9,15.8)	13.9 (12.0,15.8)	14.3 (12.8,16.1)	13.5 (12.1,15.2)	-2.7 (-3.8,-1.7)
	Female	18.4 (15.7,21.4)	18.1 (15.9,20.5)	18.0 (16.0,20.0)	18.8 (16.9,20.8)	18.1 (16.3,20.0)	17.5 (15.9,19.3)	16.2 (14.9,17.7)	15.8 (14.7,17.0)	14.8 (13.8,15.8)	13.8 (12.8,14.8)	13.2 (12.2,14.3)	12.8 (11.3,14.3)	11.7 (10.0,13.4)	11.9 (9.8,13.9)	12.0 (9.9,14.1)	13.3 (11.8,15.0)	12.8 (11.3,14.4)	-2.3 (-3.6,-1.1)
	Both	19.7 (17.4,22.3)	19.1 (17.0,21.3)	18.7 (16.8,20.8)	18.7 (16.8,20.8)	18.2 (16.3,20.1)	18.0 (16.2,19.8)	17.9 (16.3,19.5)	17.6 (16.3,19.0)	17.0 (15.8,18.2)	15.8 (14.7,17.0)	15.1 (14.0,16.2)	14.1 (12.9,15.3)	13.0 (11.7,14.4)	13.1 (11.6,14.6)	12.9 (11.4,14.5)	13.8 (12.3,15.6)	13.1 (11.7,14.8)	-2.5 (-3.6,-1.4)
Bethel Census Area, AK	Male	27.7 (23.7,32.0)	26.6 (22.7,30.9)	26.1 (22.2,30.3)	26.6 (22.7,30.6)	27.8 (23.9,31.9)	27.9 (24.1,31.9)	27.7 (24.5,30.9)	27.5 (24.6,30.4)	27.1 (24.3,30.0)	25.6 (22.6,28.7)	24.3 (21.6,27.2)	23.5 (20.5,26.7)	23.2 (20.0,26.7)	22.5 (19.0,26.5)	22.9 (18.5,27.7)	24.8 (20.8,29.2)	23.7 (19.9,28.1)	-1.0 (-2.4,0.4)
	Female	20.2 (16.0,24.9)	20.1 (16.2,24.3)	20.1 (16.4,24.0)	20.1 (16.7,24.0)	20.2 (16.8,24.0)	20.8 (17.6,24.0)	19.8 (17.3,22.4)	18.0 (15.9,20.4)	17.9 (15.9,20.1)	17.3 (15.2,19.6)	16.6 (14.3,19.1)	16.8 (13.7,20.0)	18.0 (14.4,21.6)	17.9 (13.7,22.3)	18.5 (14.1,23.0)	21.4 (17.5,25.7)	20.6 (16.9,24.8)	0.1 (-1.7,2.0)
	Both	23.9 (19.8,28.2)	23.3 (19.5,27.3)	23.0 (19.3,27.1)	23.3 (19.7,27.2)	24.0 (20.3,28.0)	24.3 (20.8,27.7)	23.7 (20.8,26.6)	22.7 (20.2,25.3)	22.4 (20.1,24.9)	21.4 (19.1,24.0)	20.4 (17.9,23.0)	20.1 (17.3,23.0)	20.5 (17.4,23.9)	20.2 (16.7,23.9)	20.7 (17.1,24.7)	23.1 (19.1,27.4)	22.1 (18.4,26.4)	-0.5 (-2.1,1.1)
Bristol Bay Borough, AK	Male	23.2 (19.6,26.9)	22.2 (18.7,25.7)	21.6 (18.2,25.2)	21.1 (17.6,24.6)	20.6 (17.2,24.2)	22.0 (18.5,25.7)	22.3 (19.1,25.4)	22.0 (19.0,25.1)	22.3 (19.4,25.1)	22.6 (19.4,25.7)	22.6 (19.7,25.7)	22.7 (19.6,25.8)	21.9 (18.9,25.0)	22.4 (19.0,26.0)	22.0 (17.5,26.5)	21.1 (17.5,24.9)	20.2 (16.7,24.1)	-0.9 (-2.4,0.7)
	Female	19.9 (15.1,25.1)	19.6 (15.2,24.4)	19.5 (15.3,23.9)	18.9 (15.0,23.0)	17.7 (14.2,21.6)	18.7 (15.4,22.5)	19.6 (16.4,23.2)	19.1 (16.2,22.3)	19.2 (16.6,22.1)	19.6 (17.0,22.6)	19.0 (16.3,22.1)	19.0 (15.9,22.8)	20.6 (17.0,24.8)	20.1 (15.6,24.6)	21.2 (16.8,25.9)	19.9 (15.8,24.3)	19.0 (15.2,23.3)	-0.3 (-2.4,1.9)
	Both	21.5 (17.4,25.9)	20.9 (17.0,24.9)	20.6 (16.8,24.5)	19.9 (16.3,23.7)	19.1 (15.7,22.8)	20.3 (17.0,23.9)	20.9 (17.8,24.3)	20.5 (17.6,23.6)	20.7 (18.0,23.5)	21.1 (18.3,23.9)	20.8 (18.1,23.8)	20.8 (17.9,24.2)	21.2 (18.0,25.0)	21.2 (17.8,25.1)	21.6 (18.1,25.4)	20.5 (16.7,24.7)	19.6 (15.8,23.7)	-0.6 (-2.3,1.2)
Denali Borough/Yukon-Koyukuk Census Area, AK	Male	27.6 (23.9,31.4)	26.6 (23.1,30.2)	26.1 (22.7,29.7)	25.6 (22.2,29.2)	25.6 (22.2,29.3)	26.3 (22.9,30.0)	26.0 (23.1,29.1)	26.9 (24.2,29.8)	26.5 (23.9,29.1)	26.1 (23.3,28.9)	25.1 (22.6,27.6)	24.8 (22.2,27.5)	23.4 (20.5,26.4)	23.9 (20.8,27.3)	23.8 (19.6,28.1)	23.7 (19.9,27.6)	22.7 (18.9,26.5)	-1.2 (-2.6,0.2)
	Female	22.4 (17.9,27.4)	22.0 (17.9,26.6)	21.7 (18.1,25.7)	21.7 (18.2,25.6)	23.1 (19.7,27.2)	24.8 (21.5,28.4)	24.2 (21.5,27.3)	23.3 (20.9,25.9)	23.8 (21.5,26.1)	22.0 (19.9,24.3)	21.8 (19.6,24.3)	21.0 (18.0,24.1)	21.8 (18.4,25.4)	23.0 (18.9,27.5)	22.6 (18.6,27.2)	21.5 (17.8,25.5)	20.6 (17.0,24.4)	-0.5 (-2.2,1.3)
	Both	24.9 (20.8,29.5)	24.3 (20.6,28.3)	23.9 (20.3,27.6)	23.6 (20.2,27.3)	24.3 (20.9,28.2)	25.5 (22.3,29.2)	25.1 (22.2,28.2)	25.1 (22.6,27.7)	25.1 (22.7,27.6)	24.0 (21.7,26.4)	23.5 (21.1,25.9)	22.9 (20.3,25.8)	22.6 (19.7,25.9)	23.4 (20.3,27.0)	23.2 (19.6,26.8)	22.6 (18.9,26.6)	21.6 (18.0,25.4)	-0.9 (-2.4,0.7)
Dillingham Census Area, AK	Male	25.4 (21.7,29.8)	24.2 (20.7,28.6)	23.7 (20.3,28.0)	24.2 (20.7,28.6)	24.6 (20.9,29.0)	25.1 (21.4,29.5)	24.2 (21.1,27.7)	23.8 (20.8,27.1)	23.6 (20.5,26.5)	23.5 (20.1,26.9)	23.9 (20.8,27.0)	23.2 (19.9,26.4)	24.2 (20.8,27.7)	25.2 (21.3,29.2)	25.7 (20.6,30.9)	23.6 (19.4,28.2)	22.6 (18.4,27.0)	-0.7 (-2.4,0.8)
	Female	20.9 (16.6,26.2)	20.6 (16.6,25.5)	20.3 (16.6,24.9)	20.0 (16.4,24.4)	18.8 (15.5,23.0)	19.4 (16.2,22.9)	19.7 (16.7,23.0)	19.5 (16.7,22.5)	19.1 (16.5,21.8)	19.0 (16.4,21.8)	19.1 (16.3,22.1)	18.3 (14.9,22.0)	18.5 (14.8,22.5)	19.6 (15.0,24.5)	21.1 (16.3,25.9)	20.2 (16.0,24.9)	19.4 (15.4,23.9)	-0.5 (-2.5,1.5)
	Both	23.1 (19.0,28.1)	22.3 (18.6,26.8)	21.9 (18.5,26.4)	22.0 (18.6,26.4)	21.6 (18.2,25.9)	22.2 (18.8,25.9)	21.9 (18.9,25.3)	21.6 (18.7,24.6)	21.3 (18.5,24.1)	21.2 (18.4,24.0)	21.5 (18.5,24.5)	20.7 (17.6,24.0)	21.3 (17.9,25.0)	22.4 (18.7,26.4)	23.4 (19.4,27.5)	21.9 (17.7,26.5)	21.0 (16.9,25.4)	-0.6 (-2.4,1.1)
Fairbanks North Star Borough, AK	Male	22.4 (19.9,25.0)	21.5 (19.2,24.0)	21.0 (18.7,23.4)	19.9 (17.9,22.1)	19.5 (17.6,21.5)	20.2 (18.3,22.3)	19.1 (17.5,20.8)	18.4 (17.0,19.9)	18.4 (17.1,19.8)	17.8 (16.4,19.3)	16.8 (15.6,18.1)	16.5 (15.2,17.9)	15.5 (14.0,17.1)	15.7 (13.9,17.4)	15.6 (13.4,17.9)	17.3 (15.3,19.4)	16.4 (14.5,18.5)	-1.9 (-3.1,-0.9)
	Female	20.3 (17.3,23.8)	19.9 (17.2,22.9)	19.7 (17.2,22.3)	18.9 (16.8,21.2)	18.5 (16.5,20.6)	17.2 (15.5,19.1)	17.0 (15.6,18.5)	15.9 (14.8,17.0)	16.0 (15.0,17.0)	15.8 (14.8,16.9)	15.7 (14.6,17.0)	15.8 (14.2,17.5)	15.8 (13.9,17.6)	15.0 (12.8,17.3)	14.3 (12.0,16.5)	13.8 (12.0,15.7)	13.2 (11.6,15.0)	-2.7 (-4.1,-1.3)
	Both	21.3 (18.5,24.4)	20.7 (18.3,23.4)	20.3 (18.0,22.9)	19.4 (17.3,21.6)	19.0 (17.1,21.0)	18.7 (16.9,20.5)	18.0 (16.5,19.6)	17.1 (15.9,18.4)	17.2 (16.0,18.3)	16.8 (15.7,17.9)	16.3 (15.2,17.5)	16.2 (14.9,17.5)	15.7 (14.1,17.3)	15.4 (13.6,17.1)	15.0 (13.2,16.8)	15.6 (13.6,17.5)	14.8 (13.0,16.7)	-2.3 (-3.5,-1.1)
Haines Borough, AK	Male	20.3 (17.3,23.7)	19.5 (16.4,22.7)	18.9 (15.8,22.0)	19.0 (16.0,22.2)	18.3 (15.2,21.6)	18.6 (15.4,21.9)	17.2 (14.7,19.9)	16.4 (14.1,19.0)	16.6 (14.3,18.9)	15.8 (13.3,18.3)	14.8 (12.7,17.0)	14.1 (12.0,16.3)	15.6 (13.3,17.8)	15.2 (12.6,17.6)	14.3 (10.9,17.6)	14.0 (11.5,16.8)	13.4 (10.8,16.1)	-2.6 (-4.1,-1.0)
	Female	15.6 (11.8,20.0)	15.2 (11.7,19.2)	15.1 (11.9,18.7)	15.9 (12.7,19.6)	16.1 (12.8,19.6)	16.2 (13.2,19.6)	15.3 (12.6,18.3)	15.3 (12.8,18.0)	13.8 (11.7,16.0)	12.4 (10.5,14.3)	11.5 (9.8,13.3)	11.1 (9.1,13.1)	13.2 (10.9,15.7)	12.0 (9.4,14.8)	11.1 (8.6,13.9)	10.4 (8.0,13.1)	9.9 (7.7,12.5)	-2.8 (-4.9,-0.7)
	Both	17.9 (14.4,21.8)	17.3 (14.1,20.8)	17.0 (13.9,20.3)	17.4 (14.3,20.9)	17.2 (14.0,20.6)	17.4 (14.3,20.7)	16.3 (13.7,19.1)	15.9 (13.5,18.4)	15.2 (12.9,17.4)	14.1 (12.0,16.2)	13.1 (11.2,15.0)	12.6 (10.7,14.6)	14.4 (12.2,16.7)	13.6 (11.4,16.0)	12.7 (10.3,15.2)	12.2 (9.7,14.9)	11.6 (9.2,14.3)	-2.7 (-4.4,-0.9)
Hoonah-Angoon Census Area/Skagway Municipality/Yakutat City and Borough, AK	Male	22.6 (19.1,26.2)	21.6 (18.3,25.2)	21.1 (17.8,24.5)	20.7 (17.5,24.2)	20.3 (17.0,23.6)	20.9 (17.6,24.2)	20.2 (17.4,23.1)	19.8 (17.1,22.5)	20.2 (17.7,22.8)	19.6 (16.9,22.5)	18.7 (16.4,21.2)	17.7 (15.5,20.1)	17.2 (15.1,19.6)	15.8 (13.4,18.6)	15.8 (12.6,19.5)	15.2 (12.5,18.2)	14.4 (11.8,17.4)	-2.8 (-4.3,-1.2)
	Female	19.2 (14.8,24.4)	18.8 (14.9,23.4)	18.6 (14.8,22.8)	18.3 (14.7,22.1)	18.8 (15.3,22.4)	18.4 (15.2,21.6)	17.8 (14.9,20.7)	17.9 (15.4,20.5)	16.4 (14.2,18.6)	15.5 (13.5,17.7)	15.5 (13.6,17.7)	14.9 (12.5,17.7)	13.6 (11.0,16.6)	13.2 (10.1,17.0)	14.9 (11.7,18.6)	14.0 (11.3,17.4)	13.5 (10.9,16.7)	-2.2 (-4.2,0.0)
	Both	20.8 (17.0,25.3)	20.2 (16.6,24.3)	19.8 (16.3,23.5)	19.5 (16.1,23.1)	19.6 (16.1,23.0)	19.6 (16.4,22.9)	18.9 (16.1,21.8)	18.8 (16.2,21.5)	18.2 (16.0,20.7)	17.5 (15.3,19.9)	17.1 (15.0,19.5)	16.3 (14.2,18.6)	15.4 (13.1,18.0)	14.5 (12.1,17.3)	15.4 (12.9,18.3)	14.6 (11.9,17.8)	13.9 (11.3,17.0)	-2.5 (-4.2,-0.6)
Juneau City and Borough, AK	Male	18.5 (16.2,21.1)	17.7 (15.5,20.1)	17.2 (15.1,19.6)	16.9 (14.8,19.2)	16.8 (14.7,19.1)	17.2 (15.1,19.7)	16.3 (14.5,18.3)	15.9 (14.2,17.7)	16.2 (14.5,17.9)	15.6 (13.8,17.6)	15.4 (13.9,17.0)	15.2 (13.6,16.9)	15.1 (13.5,17.0)	14.4 (12.5,16.4)	14.0 (11.6,16.8)	13.8 (11.7,16.2)	13.1 (11.1,15.5)	-2.1 (-3.5,-0.9)
	Female	14.4 (11.7,17.7)	14.1 (11.8,16.8)	14.0 (11.8,16.3)	14.3 (12.2,16.6)	14.5 (12.6,16.8)	14.8 (13.1,16.9)	14.2 (12.6,15.9)	14.7 (13.3,16.2)	14.4 (13.2,15.9)	13.4 (12.1,14.9)	12.9 (11.5,14.4)	13.5 (11.7,15.5)	13.1 (11.0,15.3)	12.2 (9.8,14.7)	12.7 (10.2,15.4)	12.1 (9.9,14.5)	11.5 (9.5,13.8)	-1.4 (-3.1,0.3)
	Both	16.4 (14.0,19.2)	15.9 (13.6,18.3)	15.5 (13.5,17.9)	15.6 (13.5,17.9)	15.6 (13.7,17.9)	16.0 (14.1,18.2)	15.2 (13.5,17.1)	15.3 (13.7,16.9)	15.3 (13.8,16.8)	14.5 (13.1,16.0)	14.1 (12.7,15.6)	14.3 (12.8,16.0)	14.1 (12.4,16.0)	13.3 (11.4,15.4)	13.4 (11.4,15.6)	13.0 (10.7,15.4)	12.3 (10.3,14.7)	-1.8 (-3.2,-0.3)
Kenai Peninsula Borough, AK	Male	24.4 (21.7,27.0)	23.3 (20.7,25.9)	22.7 (20.1,25.3)	22.5 (19.9,25.0)	22.2 (19.8,24.7)	22.6 (20.1,25.0)	22.7 (20.6,25.0)	21.9 (20.1,23.8)	22.5 (20.8,24.2)	21.7 (19.8,23.5)	21.6 (20.1,23.2)	20.2 (18.7,21.9)	19.4 (17.8,21.3)	18.1 (16.2,20.2)	17.6 (14.9,20.4)	17.3 (15.1,20.0)	16.5 (14.4,19.0)	-2.4 (-3.6,-1.3)
	Female	21.0 (18.1,23.9)	20.2 (17.7,22.8)	19.6 (17.4,21.9)	20.2 (17.9,22.5)	19.4 (17.1,21.7)	19.8 (17.8,21.8)	20.0 (18.3,21.6)	18.8 (17.6,20.2)	18.1 (16.9,19.4)	17.3 (16.1,18.6)	16.8 (15.4,18.4)	16.3 (14.3,18.3)	15.4 (13.3,17.7)	16.0 (13.3,18.7)	16.5 (13.7,19.3)	17.5 (15.3,20.2)	16.7 (14.7,19.1)	-1.4 (-2.6,-0.1)
	Both	22.6 (19.9,25.4)	21.7 (19.3,24.2)	21.1 (18.7,23.6)	21.3 (18.9,23.7)	20.8 (18.5,23.1)	21.2 (19.0,23.4)	21.3 (19.5,23.3)	20.3 (18.8,21.9)	20.2 (18.9,21.7)	19.4 (18.1,20.9)	19.2 (17.8,20.6)	18.2 (16.6,19.9)	17.4 (15.6,19.3)	17.0 (15.0,19.1)	17.0 (15.1,19.4)	17.4 (15.3,20.1)	16.6 (14.5,19.0)	-1.9 (-3.1,-0.8)
Ketchikan Gateway Borough/Petersburg Census Area/Prince of Wales-Hyder Census Area/Wrangell City and Borough, AK	Male	22.8 (19.9,25.8)	21.8 (19.0,24.8)	21.1 (18.5,24.1)	20.0 (17.4,22.8)	19.6 (17.1,22.3)	20.3 (17.7,23.2)	20.9 (18.7,23.5)	21.6 (19.5,23.9)	21.9 (20.0,24.0)	21.7 (19.6,23.8)	20.4 (18.7,22.1)	19.6 (17.8,21.3)	18.9 (17.0,20.9)	18.1 (16.0,20.3)	16.8 (14.0,19.6)	16.4 (13.9,19.0)	15.5 (13.2,18.1)	-2.4 (-3.6,-1.1)
	Female	24.5 (20.8,28.6)	23.8 (20.4,27.3)	23.3 (20.0,26.5)	22.0 (19.0,25.2)	22.8 (20.0,26.0)	21.0 (18.8,23.7)	21.0 (18.9,23.4)	20.2 (18.4,22.1)	19.2 (17.6,20.7)	17.7 (16.2,19.3)	18.7 (17.0,20.5)	17.5 (15.4,19.7)	17.1 (14.8,19.6)	17.1 (14.3,20.1)	16.9 (14.0,20.1)	15.8 (13.2,18.6)	15.1 (12.6,17.7)	-3.0 (-4.4,-1.6)
	Both	23.7 (20.3,27.1)	22.8 (19.8,25.8)	22.2 (19.3,25.3)	21.0 (18.2,24.0)	21.2 (18.6,24.2)	20.7 (18.3,23.3)	21.0 (18.8,23.4)	20.9 (19.0,22.9)	20.5 (18.8,22.4)	19.7 (18.0,21.3)	19.5 (17.9,21.2)	18.5 (16.7,20.4)	18.0 (16.0,20.1)	17.6 (15.5,19.9)	16.9 (14.6,19.3)	16.1 (13.5,18.8)	15.3 (12.9,17.9)	-2.7 (-4.0,-1.4)
Kodiak Island Borough, AK	Male	24.4 (21.1,27.9)	23.6 (20.5,26.9)	23.2 (20.2,26.4)	23.0 (20.0,26.3)	23.1 (20.0,26.3)	23.2 (20.2,26.5)	23.3 (20.6,26.1)	22.2 (19.7,24.9)	22.7 (20.4,25.2)	20.5 (18.1,23.1)	19.9 (17.9,22.1)	18.6 (16.6,20.9)	19.2 (17.1,21.7)	16.8 (14.5,19.5)	16.6 (13.4,20.1)	16.6 (14.0,19.7)	15.8 (13.3,18.8)	-2.7 (-4.1,-1.3)
	Female	19.7 (15.7,24.1)	19.5 (15.9,23.6)	19.5 (16.2,23.2)	19.5 (16.3,23.0)	18.7 (15.8,22.0)	18.1 (15.5,21.0)	18.4 (16.0,20.9)	17.1 (15.1,19.3)	17.0 (15.2,18.9)	16.6 (14.8,18.6)	16.3 (14.4,18.5)	15.2 (12.7,17.8)	16.5 (13.6,19.4)	15.1 (11.8,18.8)	15.6 (12.3,19.4)	15.4 (12.6,18.8)	14.7 (12.0,17.9)	-1.8 (-3.7,0.1)
	Both	22.0 (18.4,26.0)	21.5 (18.2,25.1)	21.3 (18.2,24.7)	21.2 (18.2,24.6)	20.8 (17.8,24.1)	20.6 (17.8,23.6)	20.8 (18.3,23.6)	19.6 (17.4,22.0)	19.8 (17.8,22.0)	18.5 (16.6,20.6)	18.1 (16.2,20.2)	16.9 (14.8,19.2)	17.8 (15.5,20.4)	16.0 (13.5,18.8)	16.1 (13.6,19.0)	16.0 (13.3,19.3)	15.2 (12.6,18.3)	-2.3 (-3.8,-0.7)
Lake and Peninsula Borough, AK	Male	27.2 (23.0,32.1)	26.0 (22.0,30.7)	25.6 (21.7,30.2)	25.9 (21.9,30.5)	26.1 (22.2,30.7)	26.4 (22.5,31.1)	26.3 (22.9,30.3)	25.7 (22.5,29.4)	25.5 (22.5,29.0)	24.4 (21.1,28.3)	24.0 (21.0,27.5)	22.1 (19.0,25.7)	24.0 (20.8,27.8)	21.2 (17.9,25.5)	22.0 (17.6,27.4)	21.0 (17.4,25.5)	20.1 (16.6,24.5)	-1.9 (-3.4,-0.2)
	Female	23.6 (18.4,29.8)	23.3 (18.5,29.3)	23.1 (18.5,28.6)	22.5 (18.1,27.8)	22.0 (18.0,26.9)	22.9 (19.1,27.5)	22.1 (18.8,26.2)	20.0 (17.2,23.4)	19.4 (16.9,22.4)	18.7 (16.2,21.7)	17.1 (14.5,20.3)	16.7 (13.5,20.6)	21.1 (17.1,25.6)	18.1 (13.7,23.2)	20.3 (15.7,25.5)	19.8 (15.9,24.9)	19.0 (15.2,23.8)	-1.4 (-3.3,0.8)
	Both	25.4 (20.7,31.0)	24.6 (20.2,29.8)	24.3 (20.1,29.4)	24.2 (20.0,29.2)	24.0 (20.0,28.8)	24.6 (20.8,29.1)	24.2 (20.8,28.2)	22.8 (19.8,26.3)	22.4 (19.7,25.6)	21.5 (18.9,24.8)	20.5 (17.8,23.8)	19.4 (16.4,22.9)	22.5 (19.0,26.6)	19.6 (16.2,23.9)	21.1 (17.6,25.6)	20.4 (16.7,25.2)	19.5 (15.9,24.1)	-1.6 (-3.3,0.2)
Matanuska-Susitna Borough, AK	Male	23.7 (20.5,27.3)	22.8 (19.8,26.3)	22.3 (19.4,25.7)	22.2 (19.2,25.6)	22.7 (19.6,26.1)	23.3 (20.1,26.9)	23.8 (21.1,26.7)	23.9 (21.4,26.6)	23.7 (21.5,26.3)	22.7 (20.5,25.4)	22.4 (20.6,24.7)	22.0 (20.2,24.3)	20.0 (18.2,22.2)	20.0 (18.1,22.3)	20.0 (17.3,22.8)	19.7 (17.6,22.1)	18.8 (16.6,21.1)	-1.4 (-2.6,-0.3)
	Female	20.1 (16.1,24.7)	19.6 (16.1,23.7)	19.4 (16.1,23.1)	18.9 (15.8,22.4)	19.3 (16.4,22.8)	19.9 (17.1,23.0)	20.3 (17.7,23.2)	19.7 (17.6,22.1)	19.9 (18.0,22.0)	19.0 (17.4,21.0)	18.8 (17.3,20.7)	18.2 (16.3,20.5)	17.1 (15.0,19.4)	16.7 (14.2,19.1)	16.2 (13.8,18.6)	16.2 (14.3,18.2)	15.5 (13.7,17.5)	-1.6 (-3.1,-0.1)
	Both	21.8 (18.3,25.9)	21.2 (18.0,24.9)	20.8 (17.7,24.4)	20.5 (17.5,24.0)	21.0 (17.9,24.4)	21.5 (18.6,24.7)	22.0 (19.4,24.9)	21.7 (19.4,24.3)	21.8 (19.7,24.1)	20.9 (19.0,23.0)	20.6 (18.9,22.6)	20.1 (18.3,22.2)	18.6 (16.7,20.7)	18.3 (16.5,20.4)	18.1 (16.2,20.1)	17.9 (15.9,20.1)	17.1 (15.1,19.2)	-1.5 (-2.8,-0.2)
Nome Census Area, AK	Male	31.4 (27.2,35.9)	30.4 (26.3,34.7)	29.8 (25.8,34.1)	29.0 (25.2,33.1)	31.2 (27.3,35.5)	32.0 (28.2,36.4)	32.0 (28.6,35.6)	35.3 (31.9,38.9)	34.9 (31.7,38.3)	34.3 (30.8,38.0)	33.2 (30.0,36.5)	32.1 (28.7,35.6)	28.5 (25.1,32.2)	28.2 (24.4,32.3)	28.0 (22.8,33.4)	27.3 (23.0,31.9)	26.2 (22.1,30.6)	-1.1 (-2.5,0.2)
	Female	26.6 (21.6,32.7)	25.9 (21.4,31.3)	25.5 (21.4,30.1)	24.7 (20.8,29.1)	26.8 (22.8,31.3)	26.7 (23.1,30.6)	27.7 (24.4,31.4)	27.9 (25.0,31.2)	27.7 (24.9,30.7)	26.8 (24.1,29.8)	27.4 (24.4,30.5)	26.9 (23.0,30.8)	26.8 (22.3,31.3)	26.8 (21.5,32.2)	27.0 (21.4,32.4)	25.7 (21.1,30.7)	24.8 (20.4,29.6)	-0.4 (-2.3,1.2)
	Both	29.0 (24.4,34.3)	28.1 (23.9,32.7)	27.6 (23.6,32.0)	26.8 (23.0,31.1)	29.0 (25.0,33.3)	29.3 (25.6,33.4)	29.8 (26.5,33.5)	31.6 (28.5,34.9)	31.2 (28.2,34.3)	30.5 (27.5,33.6)	30.3 (27.2,33.5)	29.5 (26.1,33.0)	27.6 (23.8,31.5)	27.5 (23.4,31.8)	27.5 (23.4,31.9)	26.5 (22.0,31.3)	25.5 (21.2,30.1)	-0.8 (-2.4,0.6)
North Slope Borough, AK	Male	31.6 (27.3,36.6)	30.4 (26.1,35.2)	29.8 (25.5,34.5)	28.7 (24.6,33.2)	29.4 (25.1,34.0)	30.5 (26.2,35.0)	30.0 (26.1,33.8)	31.6 (27.8,35.1)	31.2 (27.8,34.5)	30.7 (26.8,34.5)	29.6 (26.5,32.9)	30.2 (26.8,33.7)	32.4 (29.0,36.2)	29.1 (25.3,33.2)	28.1 (22.9,33.1)	25.5 (21.6,29.9)	24.5 (20.7,28.7)	-1.6 (-3.1,-0.2)
	Female	27.6 (22.0,33.9)	26.9 (22.0,32.6)	26.5 (22.0,31.8)	25.6 (21.3,30.6)	27.0 (22.5,31.9)	26.3 (22.2,30.4)	25.5 (22.0,29.0)	23.4 (20.5,26.4)	23.6 (20.9,26.5)	23.2 (20.5,26.3)	23.8 (20.9,27.1)	23.6 (19.8,27.7)	27.6 (23.2,32.3)	24.5 (19.0,30.0)	26.1 (20.6,31.7)	27.6 (23.0,33.0)	26.5 (22.1,31.7)	-0.2 (-2.0,1.5)
	Both	29.6 (24.8,35.0)	28.6 (24.2,33.8)	28.1 (23.8,33.1)	27.1 (22.9,31.9)	28.2 (23.7,32.9)	28.4 (24.2,32.6)	27.7 (24.0,31.3)	27.4 (24.2,30.6)	27.3 (24.3,30.5)	26.9 (23.9,30.0)	26.6 (23.7,29.9)	26.9 (23.7,30.4)	30.0 (26.5,34.1)	26.8 (23.0,30.9)	27.1 (23.2,31.5)	26.6 (22.4,31.5)	25.5 (21.4,30.1)	-0.9 (-2.5,0.6)
Northwest Arctic Borough, AK	Male	33.1 (28.3,38.1)	32.0 (27.3,36.8)	31.4 (26.7,36.2)	30.4 (25.8,35.0)	31.5 (26.9,36.4)	33.4 (28.8,38.2)	34.0 (30.1,38.1)	36.6 (32.9,40.7)	36.0 (32.6,39.6)	35.5 (31.6,39.6)	33.4 (29.9,37.0)	34.3 (30.6,38.2)	31.7 (27.7,35.7)	32.1 (27.4,36.8)	31.8 (25.5,38.1)	31.2 (25.7,36.4)	29.9 (24.5,35.3)	-0.6 (-2.1,0.8)
	Female	27.1 (20.9,33.6)	26.9 (21.5,32.8)	27.0 (21.9,32.3)	27.1 (22.3,32.2)	28.6 (23.9,33.7)	27.7 (23.9,31.9)	28.0 (24.6,31.8)	26.1 (23.2,29.3)	26.3 (23.7,29.2)	26.4 (23.5,29.4)	27.1 (23.8,30.5)	27.3 (23.2,31.6)	27.8 (23.1,32.6)	28.6 (22.7,34.6)	30.1 (24.2,36.2)	30.6 (24.8,36.2)	29.6 (24.0,35.2)	0.6 (-1.3,2.4)
	Both	30.0 (24.6,35.8)	29.4 (24.4,34.7)	29.2 (24.3,34.2)	28.7 (24.0,33.6)	30.0 (25.5,35.0)	30.5 (26.4,35.1)	30.9 (27.4,34.9)	31.3 (28.1,34.9)	31.1 (28.1,34.2)	30.8 (27.8,34.1)	30.2 (26.9,33.4)	30.8 (27.0,34.5)	29.7 (25.5,33.9)	30.3 (25.7,35.0)	31.0 (25.7,36.0)	30.9 (25.2,36.4)	29.8 (24.2,35.2)	-0.1 (-1.7,1.5)
Sitka City and Borough, AK	Male	20.1 (16.9,23.5)	19.1 (16.1,22.4)	18.5 (15.5,21.6)	17.7 (14.8,20.7)	17.4 (14.6,20.5)	18.4 (15.4,21.5)	18.7 (16.2,21.4)	19.6 (17.1,22.2)	20.1 (17.7,22.4)	20.0 (17.4,22.6)	19.6 (17.4,22.1)	19.0 (16.9,21.5)	17.9 (15.8,20.5)	15.8 (13.5,18.5)	15.3 (12.1,18.6)	14.2 (11.7,17.3)	13.5 (11.1,16.5)	-2.5 (-4.1,-0.9)
	Female	19.1 (15.0,23.9)	18.8 (15.1,22.9)	18.5 (15.2,22.4)	18.1 (14.7,21.9)	18.3 (15.0,21.8)	17.2 (14.4,20.3)	17.1 (14.5,20.0)	16.6 (14.3,19.1)	15.9 (13.9,18.1)	15.5 (13.6,17.8)	16.4 (14.4,18.7)	15.5 (13.0,18.3)	14.8 (12.2,18.0)	12.3 (9.1,15.9)	13.1 (9.8,16.7)	12.7 (10.0,16.1)	12.1 (9.6,15.3)	-2.9 (-4.9,-0.7)
	Both	19.6 (16.1,23.5)	18.9 (15.8,22.6)	18.5 (15.3,22.1)	17.9 (14.7,21.4)	17.8 (14.9,21.2)	17.8 (15.0,20.9)	17.9 (15.4,20.7)	18.0 (15.7,20.5)	17.9 (15.8,20.2)	17.7 (15.6,20.0)	18.0 (15.9,20.5)	17.2 (15.2,19.7)	16.4 (14.1,19.0)	14.0 (11.7,16.8)	14.2 (11.7,17.1)	13.4 (10.9,16.7)	12.8 (10.3,15.9)	-2.7 (-4.5,-0.8)
Southeast Fairbanks Census Area, AK	Male	23.8 (20.4,27.7)	22.9 (19.5,26.5)	22.3 (19.0,26.0)	21.6 (18.4,25.1)	20.9 (17.6,24.7)	22.0 (18.7,25.8)	21.7 (18.8,24.9)	21.6 (18.8,24.7)	21.9 (19.2,24.8)	21.3 (18.5,24.3)	20.4 (17.8,23.2)	20.4 (17.8,23.2)	18.2 (15.9,20.8)	17.4 (14.7,20.2)	17.4 (13.8,21.1)	18.0 (15.1,21.0)	17.2 (14.4,20.1)	-2.0 (-3.6,-0.6)
	Female	21.8 (17.2,27.8)	21.5 (17.3,26.8)	21.4 (17.4,26.1)	21.0 (17.2,25.4)	22.0 (18.2,26.3)	22.7 (19.1,26.8)	21.6 (18.3,25.3)	21.1 (18.1,24.4)	21.0 (18.3,24.0)	19.8 (17.3,22.5)	19.7 (17.3,22.2)	19.0 (16.2,22.0)	18.0 (15.0,21.2)	17.1 (13.4,20.8)	17.3 (13.7,20.9)	16.3 (13.2,19.5)	15.6 (12.7,18.8)	-2.1 (-4.1,-0.1)
	Both	22.8 (18.8,27.7)	22.2 (18.5,26.6)	21.8 (18.2,26.0)	21.3 (17.8,25.3)	21.5 (17.9,25.5)	22.4 (18.9,26.3)	21.6 (18.6,25.1)	21.4 (18.4,24.5)	21.5 (18.7,24.4)	20.5 (18.0,23.4)	20.1 (17.6,22.7)	19.7 (17.2,22.4)	18.1 (15.7,20.9)	17.2 (14.6,20.2)	17.3 (14.6,20.2)	17.1 (14.2,20.3)	16.4 (13.5,19.5)	-2.1 (-3.8,-0.5)
Valdez-Cordova Census Area, AK	Male	21.9 (18.9,24.8)	21.0 (18.1,23.7)	20.4 (17.6,23.1)	19.7 (17.0,22.5)	20.2 (17.2,23.0)	20.9 (17.9,23.7)	21.1 (18.5,23.5)	20.2 (17.8,22.5)	20.5 (18.2,22.7)	19.8 (17.3,22.2)	20.3 (18.2,22.6)	19.3 (17.2,21.6)	18.3 (16.0,20.7)	18.0 (15.4,20.7)	18.3 (14.8,21.7)	17.2 (14.2,20.4)	16.4 (13.5,19.5)	-1.8 (-3.3,-0.4)
	Female	20.3 (16.2,24.6)	19.7 (16.2,23.4)	19.2 (16.0,22.4)	18.9 (15.8,22.1)	18.9 (15.9,21.9)	18.7 (16.0,21.5)	17.7 (15.3,20.0)	18.5 (16.2,20.7)	17.6 (15.6,19.6)	16.9 (15.0,19.0)	17.6 (15.5,19.8)	17.3 (14.7,20.1)	15.8 (13.1,18.8)	14.9 (11.4,18.5)	15.5 (11.9,19.1)	15.3 (12.2,18.8)	14.6 (11.6,17.9)	-2.1 (-3.9,-0.2)
	Both	21.1 (17.7,24.6)	20.3 (17.2,23.4)	19.8 (16.8,22.8)	19.3 (16.4,22.2)	19.5 (16.5,22.4)	19.8 (17.0,22.5)	19.4 (16.9,21.7)	19.3 (17.1,21.5)	19.0 (16.9,21.1)	18.4 (16.3,20.4)	18.9 (16.9,21.2)	18.3 (16.1,20.8)	17.0 (14.7,19.7)	16.4 (13.9,19.2)	16.8 (14.1,19.8)	16.2 (13.2,19.6)	15.5 (12.5,18.7)	-1.9 (-3.6,-0.4)
Wade Hampton Census Area, AK	Male	29.3 (24.4,34.5)	28.3 (23.7,33.2)	27.7 (23.2,32.4)	27.9 (23.5,32.7)	28.6 (23.9,33.4)	28.6 (24.2,33.1)	29.4 (25.4,33.3)	31.3 (27.4,35.2)	30.8 (27.2,34.5)	28.0 (24.1,31.8)	26.5 (23.1,30.1)	25.6 (22.0,29.4)	24.6 (20.8,28.6)	24.5 (20.3,29.1)	25.5 (20.1,31.1)	27.1 (22.4,32.4)	25.9 (21.3,31.1)	-0.8 (-2.5,0.8)
	Female	23.0 (17.9,28.9)	22.8 (18.0,28.4)	22.7 (18.1,27.8)	22.5 (18.2,27.1)	23.7 (19.4,28.3)	23.7 (19.8,27.6)	22.1 (18.8,25.4)	21.4 (18.6,24.4)	22.6 (19.8,25.5)	21.3 (18.4,24.2)	21.4 (18.2,24.6)	21.2 (17.2,25.3)	22.3 (17.7,27.0)	22.2 (16.5,27.7)	23.3 (17.5,29.2)	25.2 (20.3,30.8)	24.4 (19.9,29.7)	0.4 (-1.7,2.4)
	Both	26.1 (21.3,31.7)	25.5 (20.8,30.7)	25.1 (20.6,30.1)	25.1 (20.8,29.8)	26.1 (21.7,30.7)	26.1 (22.0,30.3)	25.7 (22.1,29.3)	26.3 (22.8,29.7)	26.6 (23.5,29.8)	24.6 (21.4,27.8)	23.9 (20.8,27.3)	23.4 (19.7,27.1)	23.4 (19.5,27.5)	23.3 (18.9,28.0)	24.4 (19.9,29.3)	26.1 (21.4,31.6)	25.1 (20.6,30.4)	-0.2 (-2.2,1.5)
Autauga County, AL	Male	24.9 (21.9,28.5)	24.7 (21.8,28.3)	24.4 (21.4,28.0)	23.4 (20.5,26.9)	23.0 (19.9,26.7)	23.2 (20.1,27.0)	23.4 (20.7,26.6)	22.8 (20.2,25.9)	23.6 (21.1,26.6)	22.7 (20.0,26.0)	22.2 (19.8,25.0)	21.6 (19.2,24.5)	20.8 (18.4,23.6)	20.1 (17.4,23.2)	19.8 (15.9,24.1)	19.6 (16.6,23.1)	18.8 (15.8,22.3)	-1.8 (-3.1,-0.4)
	Female	20.5 (16.3,25.7)	20.4 (16.7,24.9)	20.2 (17.0,24.3)	19.9 (16.7,23.9)	19.5 (16.4,23.4)	19.7 (16.9,23.2)	19.2 (16.6,22.5)	18.8 (16.5,21.7)	19.2 (17.1,21.7)	18.5 (16.5,20.9)	18.1 (16.1,20.6)	17.7 (15.1,20.7)	17.7 (14.8,21.1)	17.6 (14.0,21.7)	18.2 (14.6,22.4)	18.7 (15.5,22.5)	18.0 (15.0,21.8)	-0.8 (-2.5,1.1)
	Both	22.7 (19.1,27.0)	22.5 (19.4,26.4)	22.3 (19.2,26.1)	21.6 (18.5,25.4)	21.2 (18.1,25.0)	21.4 (18.6,24.9)	21.2 (18.6,24.4)	20.8 (18.3,23.8)	21.3 (19.1,24.0)	20.6 (18.4,23.2)	20.1 (18.0,22.7)	19.6 (17.3,22.3)	19.2 (16.7,22.1)	18.8 (16.2,22.0)	19.0 (16.1,22.3)	19.2 (16.0,22.8)	18.4 (15.4,22.0)	-1.3 (-2.8,0.3)
Baldwin County, AL	Male	23.9 (20.7,27.2)	23.8 (20.7,27.0)	23.4 (20.4,26.8)	22.3 (19.4,25.5)	22.6 (19.6,25.9)	22.2 (19.3,25.5)	20.8 (18.3,23.5)	20.6 (18.1,23.1)	21.5 (19.2,24.0)	21.5 (18.9,24.2)	21.1 (19.0,23.6)	21.6 (19.3,24.1)	21.6 (19.3,24.0)	20.6 (18.2,23.3)	19.9 (16.8,23.3)	18.5 (15.9,21.6)	17.8 (15.2,20.7)	-1.9 (-3.1,-0.5)
	Female	18.7 (14.9,23.0)	18.5 (15.1,22.3)	18.3 (15.2,21.8)	18.5 (15.5,21.8)	18.0 (15.2,21.2)	18.7 (16.2,21.6)	18.5 (16.2,21.0)	18.6 (16.5,20.8)	18.4 (16.4,20.6)	18.9 (16.9,20.9)	17.8 (15.9,19.8)	16.5 (14.3,19.0)	17.3 (14.8,20.0)	17.3 (14.4,20.7)	15.6 (12.6,18.9)	14.9 (12.5,17.8)	14.3 (12.0,17.0)	-1.7 (-3.4,0.2)
	Both	21.3 (17.9,25.0)	21.1 (17.9,24.6)	20.8 (17.8,24.2)	20.4 (17.4,23.6)	20.2 (17.3,23.4)	20.5 (17.8,23.4)	19.7 (17.2,22.2)	19.6 (17.3,21.9)	19.9 (17.8,22.3)	20.1 (18.1,22.5)	19.4 (17.4,21.6)	19.0 (16.9,21.3)	19.4 (17.2,21.8)	18.9 (16.6,21.6)	17.7 (15.4,20.4)	16.7 (14.1,19.7)	16.0 (13.6,18.8)	-1.8 (-3.3,-0.2)
Barbour County, AL	Male	27.9 (23.9,31.7)	27.6 (23.8,31.3)	27.3 (23.5,31.0)	25.9 (22.2,29.5)	25.4 (21.6,29.2)	25.6 (21.7,29.4)	25.5 (22.1,28.8)	25.3 (22.0,28.7)	26.1 (23.0,29.3)	25.5 (21.9,29.0)	24.9 (21.8,28.1)	24.3 (21.1,27.5)	24.6 (21.5,27.9)	25.0 (21.3,28.5)	24.2 (19.3,28.7)	23.7 (19.9,27.8)	22.8 (19.0,26.7)	-1.3 (-2.6,0.2)
	Female	19.8 (15.0,24.5)	19.7 (15.3,24.0)	19.5 (15.4,23.4)	19.3 (15.6,23.0)	19.1 (15.5,22.7)	19.1 (15.9,22.6)	18.4 (15.5,21.8)	17.9 (15.3,21.1)	18.1 (15.6,20.9)	16.5 (14.4,18.9)	16.6 (14.4,19.1)	16.8 (14.4,19.7)	15.4 (12.7,18.5)	14.8 (11.6,18.6)	14.5 (11.1,18.2)	15.4 (12.3,18.9)	14.8 (11.9,18.1)	-1.8 (-3.7,0.3)
	Both	23.8 (19.4,28.0)	23.6 (19.5,27.5)	23.3 (19.5,27.1)	22.5 (18.9,26.2)	22.2 (18.5,26.0)	22.3 (18.7,25.9)	21.9 (18.8,25.2)	21.6 (18.7,24.7)	22.0 (19.3,25.0)	20.9 (18.2,23.8)	20.7 (18.1,23.4)	20.5 (18.0,23.3)	19.9 (17.3,22.9)	19.8 (17.1,23.0)	19.2 (15.9,22.6)	19.5 (16.0,23.3)	18.7 (15.4,22.4)	-1.5 (-3.0,0.1)
Bibb County, AL	Male	29.3 (25.4,33.3)	28.9 (25.2,32.9)	28.5 (24.8,32.4)	27.6 (23.9,31.5)	27.2 (23.3,31.2)	27.1 (23.3,31.2)	26.9 (23.6,30.4)	27.4 (24.1,30.9)	27.9 (24.7,31.2)	26.2 (22.9,29.9)	25.1 (22.0,28.4)	24.4 (21.3,27.9)	24.1 (21.0,27.6)	23.2 (19.6,27.3)	23.8 (19.2,29.2)	24.6 (20.8,29.1)	23.6 (19.9,28.0)	-1.3 (-2.6,0.0)
	Female	21.6 (17.0,27.0)	21.6 (17.4,26.4)	21.5 (17.6,25.9)	21.6 (17.8,25.9)	21.1 (17.4,25.1)	21.5 (17.9,25.2)	22.4 (19.1,25.9)	23.3 (19.9,26.6)	22.7 (19.7,25.7)	22.1 (19.5,25.0)	21.3 (18.6,24.3)	21.0 (17.7,24.9)	20.4 (16.9,24.5)	20.9 (16.5,25.7)	21.3 (17.0,26.4)	22.4 (18.4,27.5)	21.7 (17.8,26.5)	0.0 (-1.8,1.9)
	Both	25.4 (21.3,29.9)	25.2 (21.3,29.6)	24.9 (21.1,29.2)	24.5 (20.8,28.6)	24.1 (20.3,28.1)	24.2 (20.8,28.0)	24.6 (21.3,28.2)	25.3 (22.0,28.7)	25.2 (22.1,28.4)	24.1 (21.3,27.1)	23.2 (20.4,26.2)	22.7 (19.8,26.0)	22.2 (19.1,25.9)	22.0 (18.7,26.1)	22.5 (19.0,26.9)	23.5 (19.6,28.3)	22.6 (18.9,27.2)	-0.7 (-2.2,0.8)
Blount County, AL	Male	26.5 (23.2,30.3)	26.2 (23.0,29.9)	25.7 (22.5,29.5)	24.8 (21.6,28.7)	23.4 (20.2,27.5)	23.4 (20.2,27.2)	24.2 (21.2,27.7)	25.4 (22.4,29.0)	25.9 (22.9,29.2)	25.9 (22.5,29.7)	25.2 (22.2,28.6)	24.9 (21.7,28.4)	23.1 (20.0,26.4)	22.9 (19.5,26.5)	22.1 (17.6,26.8)	22.2 (18.6,26.1)	21.3 (17.7,25.1)	-1.4 (-2.8,0.0)
	Female	22.8 (18.2,28.5)	22.8 (18.7,27.7)	22.6 (19.0,26.9)	24.1 (20.4,28.6)	24.8 (21.0,29.2)	25.3 (21.7,29.8)	25.2 (21.8,29.4)	23.5 (20.6,27.2)	22.5 (19.8,25.6)	21.4 (18.8,24.3)	21.4 (18.6,24.4)	21.2 (17.8,24.7)	20.4 (16.8,24.1)	20.6 (16.1,24.9)	19.6 (15.3,24.1)	19.2 (15.6,23.2)	18.5 (15.1,22.3)	-1.3 (-3.3,0.5)
	Both	24.6 (20.7,29.1)	24.5 (20.9,28.5)	24.1 (20.8,28.2)	24.5 (21.0,28.6)	24.1 (20.6,28.4)	24.4 (21.1,28.5)	24.7 (21.6,28.5)	24.5 (21.5,28.1)	24.2 (21.4,27.4)	23.6 (20.8,26.8)	23.3 (20.4,26.5)	23.0 (20.1,26.4)	21.7 (18.5,25.2)	21.7 (18.4,25.5)	20.8 (17.5,24.4)	20.7 (17.1,24.7)	19.9 (16.4,23.6)	-1.3 (-3.0,0.2)
Bullock County, AL	Male	28.8 (24.4,33.3)	28.7 (24.4,33.2)	28.4 (24.2,32.9)	27.0 (22.8,31.4)	26.6 (22.5,31.1)	27.0 (22.8,31.5)	26.6 (23.1,30.3)	26.6 (23.2,30.2)	27.3 (24.0,30.7)	26.2 (22.6,30.0)	25.2 (22.0,28.8)	24.6 (21.3,28.3)	23.6 (20.3,27.3)	23.8 (20.2,28.2)	24.2 (19.1,29.8)	24.5 (20.7,29.1)	23.6 (19.8,28.1)	-1.2 (-2.7,0.2)
	Female	16.2 (12.2,21.1)	16.2 (12.6,20.7)	16.2 (12.7,20.3)	17.3 (13.7,21.4)	17.2 (13.8,21.3)	17.1 (14.0,20.8)	17.1 (14.1,20.5)	16.5 (13.9,19.4)	16.4 (13.9,18.9)	15.1 (13.0,17.7)	15.3 (13.2,18.0)	15.5 (12.7,18.6)	14.4 (11.5,17.8)	13.7 (10.2,17.7)	14.7 (11.2,18.8)	14.0 (11.0,17.8)	13.6 (10.6,17.2)	-1.1 (-3.3,1.3)
	Both	22.4 (18.5,27.0)	22.3 (18.4,26.7)	22.2 (18.3,26.4)	22.0 (18.2,26.2)	21.8 (18.1,26.1)	22.0 (18.4,26.0)	21.8 (18.6,25.4)	21.5 (18.5,24.7)	21.7 (18.9,24.7)	20.6 (17.8,23.6)	20.2 (17.5,23.3)	19.9 (17.2,23.2)	18.9 (16.1,22.3)	18.7 (15.7,22.3)	19.4 (16.0,23.6)	19.2 (15.7,23.4)	18.5 (15.1,22.6)	-1.2 (-2.9,0.5)
Butler County, AL	Male	27.5 (23.8,31.5)	27.3 (23.6,31.2)	26.8 (23.2,30.9)	26.5 (22.8,30.4)	26.3 (22.6,30.6)	25.5 (21.9,29.8)	25.2 (22.0,28.7)	25.2 (22.2,28.7)	25.1 (22.2,28.4)	24.1 (21.1,27.8)	24.5 (21.5,27.8)	24.3 (21.3,27.5)	25.1 (22.0,28.2)	24.3 (20.7,27.9)	24.1 (19.6,29.0)	23.3 (19.3,27.5)	22.4 (18.5,26.7)	-1.3 (-2.8,0.1)
	Female	18.2 (14.1,22.9)	18.3 (14.4,22.6)	18.3 (14.8,22.2)	18.3 (15.0,22.3)	19.0 (15.5,22.9)	19.9 (16.7,23.6)	19.1 (16.2,22.5)	19.0 (16.4,22.1)	20.1 (17.5,23.0)	19.4 (17.1,22.1)	17.7 (15.4,20.2)	19.0 (15.9,21.9)	17.9 (14.5,21.3)	18.4 (14.1,22.4)	17.7 (13.3,21.9)	18.9 (15.1,23.1)	18.1 (14.5,22.2)	0.0 (-2.1,1.8)
	Both	22.8 (18.9,27.0)	22.7 (19.1,26.7)	22.5 (19.0,26.4)	22.3 (18.8,26.3)	22.6 (19.0,26.7)	22.7 (19.3,26.5)	22.1 (19.2,25.5)	22.1 (19.3,25.4)	22.6 (19.9,25.7)	21.8 (19.1,24.8)	21.0 (18.5,23.9)	21.6 (18.8,24.4)	21.4 (18.4,24.6)	21.3 (17.9,24.7)	20.9 (17.3,24.6)	21.1 (17.2,25.3)	20.2 (16.5,24.3)	-0.7 (-2.5,0.8)
Calhoun County, AL	Male	26.1 (22.8,29.8)	25.9 (22.6,29.6)	25.6 (22.2,29.2)	25.2 (21.9,28.7)	24.4 (20.9,28.0)	24.5 (21.0,28.1)	24.1 (21.0,27.1)	23.5 (20.6,26.3)	23.6 (20.8,26.4)	23.5 (20.6,26.5)	22.3 (19.7,24.7)	22.0 (19.5,24.5)	22.7 (20.1,25.3)	23.4 (20.4,26.3)	23.0 (18.9,27.2)	23.3 (19.9,26.9)	22.4 (19.2,25.9)	-0.9 (-2.3,0.3)
	Female	22.8 (18.8,28.1)	22.8 (19.2,27.4)	22.7 (19.3,26.8)	21.8 (18.4,25.5)	21.7 (18.4,25.2)	21.2 (18.1,24.3)	20.9 (18.1,23.6)	21.8 (19.2,24.3)	21.4 (19.0,23.6)	20.4 (18.2,22.3)	21.6 (19.4,23.7)	20.7 (18.1,23.3)	21.8 (18.8,24.5)	21.4 (17.8,24.8)	21.1 (17.3,24.7)	18.2 (15.2,21.5)	17.5 (14.8,20.5)	-1.6 (-3.4,-0.1)
	Both	24.4 (20.9,28.8)	24.3 (21.1,28.4)	24.1 (20.7,27.8)	23.5 (20.1,27.0)	23.0 (19.6,26.5)	22.8 (19.5,26.1)	22.4 (19.5,25.2)	22.6 (19.9,25.2)	22.5 (19.9,25.0)	21.9 (19.5,24.2)	22.0 (19.7,24.0)	21.4 (19.0,23.6)	22.2 (19.5,24.8)	22.4 (19.5,25.3)	22.0 (19.2,25.0)	20.7 (17.6,24.2)	19.9 (16.9,23.2)	-1.3 (-2.8,0.0)
Chambers County, AL	Male	28.9 (25.1,33.0)	28.7 (25.0,32.6)	28.2 (24.5,32.2)	27.4 (23.7,31.3)	27.6 (23.6,31.7)	27.1 (23.0,31.2)	26.9 (23.5,30.4)	26.2 (22.9,29.6)	26.5 (23.5,29.8)	25.6 (22.2,29.2)	25.4 (22.5,28.8)	25.1 (22.0,28.5)	24.9 (21.9,28.3)	24.7 (21.1,28.5)	24.9 (20.1,29.7)	25.1 (21.4,29.3)	24.0 (20.4,28.2)	-1.1 (-2.6,0.2)
	Female	19.3 (15.0,24.2)	19.3 (15.3,23.7)	19.2 (15.7,23.2)	18.8 (15.4,22.6)	19.3 (15.8,23.1)	20.0 (16.7,23.6)	20.0 (16.9,23.3)	20.2 (17.3,23.4)	21.3 (18.6,24.3)	19.6 (17.2,22.3)	19.1 (16.8,21.8)	19.8 (16.9,22.8)	19.5 (16.3,23.0)	19.2 (15.1,23.3)	20.1 (16.1,24.3)	18.7 (15.3,22.7)	18.0 (14.8,21.8)	-0.4 (-2.3,1.4)
	Both	24.0 (20.0,28.5)	23.9 (20.2,28.0)	23.6 (20.1,27.5)	23.0 (19.5,26.8)	23.4 (19.7,27.4)	23.5 (20.0,27.3)	23.4 (20.2,26.8)	23.2 (20.1,26.4)	23.9 (21.0,27.0)	22.6 (19.8,25.7)	22.2 (19.5,25.1)	22.4 (19.7,25.3)	22.2 (19.3,25.3)	21.9 (18.8,25.4)	22.5 (19.1,26.3)	21.8 (18.3,25.9)	21.0 (17.5,24.9)	-0.8 (-2.5,0.7)
Cherokee County, AL	Male	27.9 (24.2,32.0)	27.6 (23.9,31.5)	27.1 (23.4,31.0)	26.5 (22.9,30.5)	25.9 (22.3,30.0)	25.8 (22.1,29.9)	25.9 (22.6,29.4)	25.1 (22.0,28.6)	25.0 (22.1,28.2)	24.8 (21.5,28.5)	24.2 (21.2,27.3)	23.5 (20.5,26.7)	22.8 (19.8,26.1)	23.6 (20.2,27.4)	21.9 (17.4,26.8)	22.1 (18.5,26.2)	21.2 (17.6,25.0)	-1.7 (-3.1,-0.2)
	Female	24.9 (19.7,30.7)	24.7 (20.1,30.0)	24.4 (20.3,29.5)	23.9 (19.8,28.5)	23.5 (19.5,27.9)	22.3 (18.9,26.4)	22.2 (19.0,26.0)	22.1 (19.1,25.6)	22.3 (19.5,25.5)	21.4 (18.9,24.2)	21.3 (18.7,24.3)	21.0 (18.0,24.7)	20.1 (16.8,24.2)	19.5 (15.4,24.5)	18.7 (14.6,23.4)	19.1 (15.3,23.4)	18.4 (14.9,22.5)	-1.9 (-3.7,0.2)
	Both	26.3 (22.0,31.3)	26.1 (22.1,30.8)	25.7 (21.9,30.1)	25.2 (21.3,29.4)	24.7 (20.8,28.9)	24.1 (20.6,28.0)	24.0 (20.8,27.6)	23.6 (20.6,27.0)	23.6 (20.8,26.8)	23.1 (20.3,26.1)	22.7 (20.1,25.7)	22.2 (19.4,25.4)	21.4 (18.5,24.9)	21.5 (18.2,25.2)	20.3 (16.9,24.1)	20.6 (16.8,24.7)	19.8 (16.3,23.8)	-1.8 (-3.4,0.0)
Chilton County, AL	Male	28.1 (24.3,32.2)	27.9 (24.1,31.8)	27.4 (23.7,31.4)	25.7 (22.1,29.7)	25.6 (22.0,29.7)	25.1 (21.4,29.1)	24.9 (21.6,28.4)	25.1 (22.0,28.5)	26.2 (23.2,29.6)	24.5 (21.2,28.1)	24.6 (21.6,28.0)	24.1 (21.2,27.5)	22.8 (20.0,26.1)	21.8 (18.6,25.4)	22.9 (18.6,27.5)	22.1 (18.7,26.1)	21.2 (17.8,24.9)	-1.8 (-3.2,-0.5)
	Female	22.5 (17.9,27.8)	22.4 (18.2,27.3)	22.3 (18.4,26.9)	22.4 (18.5,26.7)	22.3 (18.6,26.5)	23.2 (19.7,27.0)	23.0 (19.8,26.6)	22.7 (19.8,26.0)	22.2 (19.7,25.1)	22.0 (19.5,24.8)	21.6 (19.1,24.6)	21.7 (18.7,25.1)	21.8 (18.3,25.6)	22.1 (17.7,26.3)	22.5 (18.0,27.0)	21.7 (18.0,26.0)	20.9 (17.4,24.9)	-0.4 (-2.2,1.3)
	Both	25.2 (21.0,29.9)	25.1 (21.2,29.5)	24.8 (21.0,28.9)	24.0 (20.3,28.1)	23.9 (20.3,28.0)	24.1 (20.6,28.0)	23.9 (20.8,27.5)	23.9 (20.9,27.3)	24.2 (21.4,27.4)	23.2 (20.5,26.3)	23.1 (20.4,26.1)	22.9 (20.3,26.1)	22.3 (19.4,25.8)	21.9 (18.8,25.5)	22.7 (19.4,26.4)	21.9 (18.3,26.0)	21.1 (17.5,25.0)	-1.1 (-2.7,0.3)
Choctaw County, AL	Male	26.7 (22.9,30.6)	26.6 (22.8,30.3)	26.3 (22.6,30.2)	24.9 (21.3,28.6)	24.5 (20.8,28.5)	24.7 (20.9,28.6)	24.5 (21.1,28.0)	23.5 (20.3,26.9)	24.6 (21.5,27.8)	23.1 (19.9,26.6)	21.7 (19.0,24.8)	21.0 (18.2,24.2)	21.2 (18.4,24.4)	20.5 (17.3,24.1)	19.9 (15.5,24.7)	21.6 (18.1,25.8)	20.7 (17.2,24.8)	-1.6 (-3.1,-0.1)
	Female	16.4 (12.3,21.0)	16.4 (12.8,20.6)	16.4 (13.0,20.0)	16.8 (13.4,20.3)	16.4 (13.3,20.0)	16.5 (13.5,19.9)	16.4 (13.5,19.6)	15.9 (13.5,18.9)	16.7 (14.3,19.5)	16.5 (14.4,19.0)	16.0 (13.9,18.4)	15.8 (13.4,18.9)	16.3 (13.5,19.8)	15.1 (11.7,19.3)	14.4 (10.9,18.6)	15.2 (12.1,18.9)	14.7 (11.7,18.3)	-0.7 (-2.8,1.6)
	Both	21.5 (17.6,25.7)	21.4 (17.8,25.3)	21.2 (17.7,24.9)	20.8 (17.3,24.3)	20.4 (16.9,24.2)	20.5 (17.2,24.2)	20.3 (17.3,23.7)	19.7 (16.8,22.8)	20.6 (17.8,23.6)	19.7 (17.1,22.5)	18.8 (16.5,21.6)	18.4 (16.0,21.2)	18.7 (16.1,21.9)	17.8 (15.0,21.2)	17.1 (14.1,20.7)	18.3 (15.1,22.3)	17.6 (14.4,21.5)	-1.2 (-2.9,0.6)
Clarke County, AL	Male	25.8 (22.1,30.1)	25.5 (21.9,29.7)	25.1 (21.7,29.2)	23.9 (20.5,28.0)	23.5 (19.9,27.7)	23.3 (19.9,27.5)	22.9 (20.1,26.3)	21.9 (19.2,25.2)	23.2 (20.5,26.4)	22.2 (19.2,25.7)	21.8 (19.1,24.8)	21.6 (18.9,24.7)	22.2 (19.4,25.4)	21.1 (17.8,24.6)	20.4 (15.9,25.4)	21.7 (18.0,25.4)	20.7 (17.2,24.4)	-1.4 (-2.8,0.2)
	Female	17.3 (13.3,22.4)	17.2 (13.6,21.8)	17.1 (13.8,21.6)	17.5 (14.2,21.8)	17.4 (14.2,21.4)	17.6 (14.6,21.4)	17.4 (14.7,20.7)	17.6 (15.1,20.7)	18.5 (16.0,21.3)	17.9 (15.6,20.5)	17.4 (15.1,19.9)	17.6 (14.9,20.6)	17.1 (14.2,20.2)	15.9 (12.5,19.7)	15.5 (12.1,19.4)	15.3 (12.2,18.7)	14.8 (11.8,18.2)	-0.9 (-3.0,1.2)
	Both	21.4 (17.8,25.9)	21.3 (17.8,25.7)	21.1 (17.7,25.2)	20.7 (17.3,24.8)	20.4 (17.0,24.4)	20.4 (17.2,24.3)	20.1 (17.3,23.5)	19.7 (17.2,22.8)	20.8 (18.3,23.8)	20.0 (17.5,22.8)	19.6 (17.1,22.2)	19.6 (17.0,22.4)	19.6 (16.9,22.6)	18.5 (15.5,21.6)	17.9 (14.9,21.3)	18.4 (15.0,22.0)	17.7 (14.4,21.3)	-1.2 (-2.9,0.6)
Clay County, AL	Male	27.8 (23.9,31.9)	27.6 (23.8,31.6)	27.2 (23.4,31.1)	25.9 (22.3,29.9)	25.7 (21.8,29.5)	25.8 (22.1,29.8)	25.6 (22.4,29.0)	25.4 (22.2,28.7)	25.3 (22.2,28.5)	24.1 (20.7,27.7)	23.1 (19.9,26.4)	23.1 (19.8,26.6)	23.0 (19.8,26.6)	23.6 (19.9,27.8)	25.2 (20.3,30.6)	24.7 (20.8,29.5)	23.7 (19.8,28.4)	-1.0 (-2.4,0.4)
	Female	21.7 (17.0,27.0)	21.7 (17.4,26.6)	21.6 (17.6,26.3)	21.5 (17.5,26.0)	22.4 (18.4,26.7)	23.2 (19.6,27.2)	23.5 (20.1,27.3)	24.6 (21.3,28.3)	24.3 (21.2,27.7)	22.9 (20.0,25.8)	22.0 (18.9,25.1)	20.8 (17.5,24.7)	20.6 (17.0,24.8)	20.6 (16.0,25.7)	21.8 (17.1,27.0)	22.2 (18.0,27.3)	21.4 (17.3,26.4)	-0.1 (-1.9,1.9)
	Both	24.7 (20.5,29.3)	24.6 (20.5,29.1)	24.3 (20.5,28.6)	23.7 (19.9,27.9)	24.0 (20.1,28.1)	24.5 (20.8,28.3)	24.5 (21.3,28.0)	25.0 (21.8,28.4)	24.8 (21.7,28.1)	23.5 (20.4,26.6)	22.6 (19.6,25.5)	21.9 (18.7,25.2)	21.8 (18.5,25.5)	22.1 (18.5,26.0)	23.5 (19.6,27.9)	23.4 (19.4,28.4)	22.5 (18.5,27.4)	-0.6 (-2.2,1.0)
Cleburne County, AL	Male	28.7 (24.5,33.5)	28.4 (24.3,33.0)	27.9 (23.9,32.6)	26.8 (22.9,31.4)	26.2 (22.3,30.9)	25.7 (21.8,30.4)	25.9 (22.5,29.7)	25.8 (22.5,29.5)	25.9 (22.9,29.4)	25.3 (21.9,29.2)	25.2 (22.0,28.6)	25.3 (22.1,28.8)	26.0 (22.8,29.4)	24.5 (21.0,28.4)	24.6 (19.6,30.0)	24.4 (20.6,28.6)	23.5 (19.8,27.6)	-1.2 (-2.7,0.2)
	Female	23.7 (18.3,30.7)	23.6 (18.7,29.9)	23.4 (18.8,29.2)	22.6 (18.3,27.9)	22.4 (18.3,27.6)	21.7 (18.2,25.9)	22.4 (19.1,26.5)	23.3 (20.1,26.8)	24.5 (21.5,27.8)	24.0 (21.1,27.2)	24.5 (21.4,27.9)	22.7 (19.1,26.5)	22.4 (18.4,26.5)	20.3 (15.2,25.3)	21.8 (16.9,27.0)	23.0 (18.7,27.9)	22.2 (18.2,26.7)	-0.4 (-2.4,1.6)
	Both	26.2 (21.4,32.0)	26.0 (21.5,31.4)	25.6 (21.5,30.8)	24.7 (20.6,29.6)	24.3 (20.3,29.3)	23.7 (20.0,28.1)	24.1 (20.8,28.0)	24.5 (21.3,28.1)	25.2 (22.1,28.5)	24.7 (21.7,27.9)	24.8 (21.9,28.2)	24.0 (20.8,27.3)	24.2 (20.6,27.8)	22.4 (18.7,26.2)	23.2 (19.4,27.4)	23.7 (19.7,28.2)	22.8 (19.0,27.1)	-0.8 (-2.5,0.8)
Coffee County, AL	Male	23.9 (20.5,27.5)	23.7 (20.4,27.2)	23.3 (20.2,26.7)	22.5 (19.5,26.0)	22.9 (19.8,26.7)	22.2 (19.2,25.8)	22.3 (19.6,25.4)	22.9 (20.0,25.9)	23.0 (20.2,25.8)	21.6 (18.7,24.7)	21.2 (18.5,24.0)	20.8 (18.1,23.6)	19.9 (17.3,22.6)	19.5 (16.4,22.7)	19.5 (15.4,23.6)	19.3 (16.1,22.7)	18.5 (15.3,21.9)	-1.6 (-3.1,-0.2)
	Female	18.5 (14.5,23.1)	18.5 (14.6,22.7)	18.4 (14.8,22.2)	18.3 (14.9,22.1)	18.2 (15.1,21.8)	18.6 (15.7,22.1)	18.4 (15.7,21.6)	18.3 (15.9,21.1)	17.5 (15.2,20.0)	18.1 (15.9,20.5)	17.5 (15.3,19.8)	17.5 (14.9,20.6)	17.6 (14.8,21.0)	16.7 (13.2,20.8)	16.6 (13.2,20.8)	15.5 (12.4,18.9)	14.9 (12.0,18.1)	-1.4 (-3.3,0.7)
	Both	21.2 (17.5,25.1)	21.0 (17.5,24.7)	20.8 (17.4,24.4)	20.4 (17.2,24.0)	20.5 (17.5,24.2)	20.4 (17.4,23.8)	20.3 (17.6,23.5)	20.6 (17.9,23.4)	20.2 (17.7,22.9)	19.8 (17.3,22.4)	19.3 (16.9,21.8)	19.1 (16.6,21.8)	18.7 (16.2,21.6)	18.1 (15.4,21.1)	18.0 (15.1,21.2)	17.3 (14.3,20.8)	16.7 (13.6,20.0)	-1.5 (-3.2,0.2)
Colbert County, AL	Male	25.6 (22.0,29.3)	25.3 (21.9,29.0)	24.9 (21.4,28.5)	24.7 (21.2,28.4)	24.1 (20.6,27.8)	23.9 (20.4,27.4)	24.4 (21.3,27.5)	24.4 (21.2,27.5)	24.3 (21.4,27.1)	24.3 (21.1,27.5)	24.1 (21.3,26.9)	23.4 (20.7,26.1)	23.3 (20.6,25.9)	22.8 (19.9,25.8)	22.1 (18.0,26.0)	21.4 (18.0,24.8)	20.5 (17.1,23.9)	-1.4 (-2.8,-0.1)
	Female	20.8 (16.4,25.5)	20.8 (16.9,25.0)	20.7 (17.0,24.7)	21.1 (17.6,25.1)	21.8 (18.2,25.6)	20.4 (17.0,23.9)	21.4 (18.2,24.7)	21.6 (18.7,24.7)	21.4 (18.8,24.0)	20.5 (18.2,22.9)	21.0 (18.7,23.5)	20.5 (17.9,23.4)	19.1 (16.1,22.2)	18.7 (14.8,22.5)	18.1 (14.2,22.0)	17.6 (14.3,20.9)	16.9 (13.9,20.2)	-1.3 (-3.1,0.5)
	Both	23.2 (19.3,27.2)	23.0 (19.4,26.9)	22.7 (19.3,26.6)	22.9 (19.4,26.6)	22.9 (19.4,26.6)	22.1 (18.7,25.6)	22.8 (19.6,26.2)	23.0 (20.0,26.0)	22.8 (20.1,25.6)	22.4 (19.7,25.0)	22.5 (20.1,25.1)	21.9 (19.5,24.5)	21.1 (18.5,23.9)	20.7 (17.8,23.7)	20.1 (17.1,23.2)	19.5 (16.2,22.8)	18.7 (15.5,22.0)	-1.3 (-3.0,0.2)
Conecuh County, AL	Male	27.1 (23.4,31.5)	26.8 (23.2,30.9)	26.4 (22.8,30.4)	25.8 (22.3,29.9)	25.4 (21.7,29.7)	25.0 (21.4,29.3)	24.5 (21.3,28.0)	24.6 (21.3,28.0)	24.5 (21.5,27.7)	23.6 (20.2,27.0)	23.9 (20.8,27.0)	24.4 (21.2,27.6)	24.1 (21.0,27.3)	24.1 (20.6,27.8)	24.3 (19.7,29.2)	23.7 (20.0,27.8)	22.8 (19.2,26.8)	-1.1 (-2.4,0.2)
	Female	18.3 (14.5,23.5)	18.2 (14.6,22.9)	18.0 (14.6,22.4)	17.4 (14.1,21.5)	18.4 (15.0,22.4)	19.3 (16.0,23.0)	18.3 (15.2,21.6)	17.9 (15.2,20.9)	18.7 (16.2,21.5)	18.4 (16.0,21.0)	17.4 (15.0,20.0)	19.5 (16.6,22.6)	19.4 (16.1,22.8)	18.9 (14.9,23.0)	17.6 (13.7,21.7)	17.5 (14.0,21.3)	16.9 (13.6,20.7)	-0.5 (-2.6,1.3)
	Both	22.6 (19.0,27.3)	22.4 (18.9,26.9)	22.1 (18.7,26.3)	21.5 (18.1,25.6)	21.8 (18.3,26.0)	22.1 (18.7,26.1)	21.3 (18.2,24.7)	21.2 (18.3,24.4)	21.6 (18.8,24.6)	21.0 (18.2,23.8)	20.6 (18.0,23.3)	21.9 (19.1,24.9)	21.7 (18.7,25.0)	21.5 (18.2,25.0)	20.9 (17.6,24.4)	20.5 (17.0,24.5)	19.8 (16.4,23.6)	-0.8 (-2.5,0.6)
Coosa County, AL	Male	27.4 (23.3,31.3)	27.2 (23.2,30.9)	26.9 (22.8,30.7)	25.5 (21.6,29.2)	25.5 (21.6,29.2)	25.8 (21.7,29.7)	25.4 (22.1,28.8)	26.4 (23.2,29.7)	27.3 (24.1,30.5)	25.9 (22.4,29.5)	25.7 (22.5,29.1)	26.4 (23.0,29.9)	24.6 (21.3,28.1)	24.7 (20.8,28.7)	25.5 (20.4,30.6)	25.0 (20.9,29.2)	24.0 (19.9,28.3)	-0.8 (-2.2,0.6)
	Female	19.3 (14.7,24.4)	19.4 (15.0,23.7)	19.3 (15.3,23.5)	19.0 (15.2,22.9)	19.9 (16.1,23.8)	21.0 (17.7,24.6)	21.2 (18.1,24.7)	22.4 (19.3,25.7)	22.5 (19.6,25.6)	22.2 (19.6,25.1)	21.2 (18.4,24.4)	20.6 (17.1,24.3)	20.7 (16.8,25.0)	21.0 (16.4,26.3)	21.0 (16.4,26.1)	21.6 (17.0,26.4)	20.9 (16.5,25.5)	0.5 (-1.4,2.7)
	Both	23.3 (18.9,27.5)	23.2 (19.1,27.3)	23.0 (19.0,26.9)	22.2 (18.4,26.0)	22.6 (18.8,26.4)	23.4 (19.8,27.1)	23.3 (20.1,26.7)	24.3 (21.3,27.5)	24.8 (21.9,28.0)	24.0 (21.0,27.1)	23.4 (20.4,26.5)	23.4 (20.3,26.9)	22.6 (19.1,26.3)	22.8 (19.1,26.8)	23.2 (19.3,27.4)	23.3 (18.9,27.8)	22.5 (18.2,26.9)	-0.2 (-1.8,1.6)
Covington County, AL	Male	27.9 (24.0,31.8)	27.6 (23.9,31.7)	27.2 (23.4,31.1)	26.9 (23.2,31.0)	27.2 (23.4,31.3)	26.3 (22.5,30.5)	26.6 (23.3,30.1)	27.8 (24.5,31.3)	27.7 (24.5,31.1)	26.9 (23.2,30.5)	27.1 (23.9,30.4)	27.3 (24.0,30.7)	26.3 (23.2,29.8)	26.4 (22.7,30.3)	25.7 (20.4,30.6)	24.9 (21.1,29.5)	23.9 (20.1,28.4)	-1.0 (-2.4,0.5)
	Female	20.8 (16.0,25.9)	20.9 (16.5,25.6)	20.8 (16.8,25.2)	20.0 (16.3,24.4)	20.9 (17.2,25.0)	21.3 (18.0,25.0)	20.8 (17.7,24.2)	20.5 (17.6,23.8)	21.5 (18.8,24.4)	21.6 (18.9,24.4)	20.3 (17.7,23.2)	22.3 (19.2,26.0)	22.3 (18.8,26.3)	22.1 (17.8,26.9)	20.3 (16.0,25.2)	19.7 (16.1,24.1)	19.0 (15.6,23.3)	-0.6 (-2.5,1.4)
	Both	24.3 (20.0,28.9)	24.2 (20.2,28.4)	24.0 (20.2,28.3)	23.4 (19.7,27.6)	24.0 (20.3,28.1)	23.8 (20.3,27.6)	23.7 (20.4,27.0)	24.1 (21.0,27.5)	24.5 (21.6,27.7)	24.2 (21.3,27.3)	23.7 (20.8,26.6)	24.8 (21.8,28.1)	24.3 (21.2,27.8)	24.2 (20.9,28.0)	22.9 (19.5,26.9)	22.3 (18.5,26.8)	21.4 (17.8,25.7)	-0.8 (-2.4,0.8)
Crenshaw County, AL	Male	27.7 (23.9,31.9)	27.4 (23.6,31.6)	27.0 (23.2,31.2)	26.3 (22.6,30.4)	25.9 (22.0,30.6)	25.2 (21.4,29.6)	25.8 (22.4,29.9)	25.9 (22.7,29.8)	25.7 (22.6,29.3)	24.0 (20.7,27.8)	23.6 (20.7,27.1)	23.2 (20.2,26.9)	22.3 (19.2,25.9)	21.3 (17.8,25.5)	22.7 (17.9,27.9)	22.9 (18.9,27.5)	21.9 (18.1,26.4)	-1.5 (-2.9,0.1)
	Female	20.4 (16.2,26.1)	20.3 (16.3,25.1)	20.1 (16.3,24.5)	19.9 (16.0,24.5)	19.7 (16.0,24.3)	20.1 (16.7,24.5)	19.9 (16.7,23.8)	20.4 (17.5,24.0)	20.7 (18.0,24.1)	21.3 (18.7,24.5)	20.3 (17.7,23.4)	21.3 (17.9,25.1)	20.9 (17.2,24.9)	20.1 (15.6,25.1)	19.6 (15.1,24.8)	19.6 (15.6,24.5)	18.9 (15.0,23.5)	-0.5 (-2.5,1.6)
	Both	24.0 (20.0,28.7)	23.8 (20.0,28.2)	23.5 (19.7,27.7)	23.0 (19.3,27.3)	22.8 (19.0,27.4)	22.6 (19.0,27.1)	22.8 (19.5,26.8)	23.1 (20.1,26.8)	23.2 (20.3,26.6)	22.6 (19.8,26.0)	21.9 (19.2,25.2)	22.2 (19.4,25.7)	21.5 (18.4,25.2)	20.7 (17.3,24.7)	21.1 (17.5,25.6)	21.2 (17.2,25.9)	20.4 (16.5,25.0)	-1.0 (-2.7,0.8)
Cullman County, AL	Male	27.3 (23.7,31.4)	27.1 (23.4,31.0)	26.6 (22.9,30.7)	25.7 (22.1,29.7)	24.4 (20.9,28.7)	24.5 (20.9,28.8)	25.4 (22.2,29.2)	26.2 (23.0,30.0)	26.9 (23.9,30.5)	27.7 (24.4,31.7)	27.2 (24.3,30.7)	26.5 (23.5,30.0)	24.1 (21.3,27.5)	23.4 (20.2,27.2)	21.3 (17.1,26.1)	22.1 (18.9,26.0)	21.2 (18.0,25.0)	-1.6 (-3.0,-0.2)
	Female	23.0 (18.8,27.8)	22.9 (19.0,27.6)	22.8 (19.1,27.2)	24.0 (20.0,28.4)	24.4 (20.3,29.0)	24.7 (21.0,28.9)	24.5 (21.1,28.4)	23.8 (20.9,27.2)	23.3 (20.8,26.3)	22.1 (19.8,24.9)	21.6 (19.2,24.4)	21.9 (18.8,25.3)	22.0 (18.4,25.9)	21.4 (17.1,26.0)	21.3 (17.0,26.0)	19.8 (16.4,23.8)	19.1 (15.8,22.9)	-1.2 (-2.9,0.7)
	Both	25.1 (21.3,29.5)	25.0 (21.3,29.1)	24.7 (21.1,28.7)	24.8 (21.1,29.1)	24.4 (20.7,28.9)	24.6 (21.1,28.8)	24.9 (21.6,28.7)	25.0 (22.0,28.6)	25.1 (22.4,28.4)	24.9 (22.2,28.0)	24.4 (21.8,27.3)	24.2 (21.4,27.2)	23.0 (20.0,26.3)	22.4 (19.2,25.9)	21.3 (18.2,24.9)	20.9 (17.6,24.8)	20.1 (16.9,23.9)	-1.4 (-2.9,0.2)
Dale County, AL	Male	24.2 (21.2,27.9)	24.0 (21.1,27.5)	23.6 (20.7,27.2)	22.6 (19.7,26.1)	22.4 (19.5,26.1)	22.4 (19.3,26.1)	22.8 (20.1,25.9)	23.0 (20.4,26.2)	23.2 (20.6,26.3)	22.3 (19.5,25.7)	21.9 (19.3,25.0)	20.8 (18.3,24.0)	21.0 (18.4,24.1)	20.0 (17.2,23.4)	20.3 (16.6,24.6)	19.7 (16.5,23.4)	18.8 (15.8,22.5)	-1.6 (-3.0,-0.1)
	Female	21.1 (16.8,26.4)	21.0 (17.1,25.8)	20.8 (17.3,25.1)	20.9 (17.6,25.0)	20.1 (16.9,24.2)	19.7 (16.9,23.3)	19.1 (16.5,22.3)	18.9 (16.4,21.9)	18.5 (16.1,21.3)	18.0 (15.8,20.5)	18.3 (16.1,20.9)	17.8 (15.1,20.9)	17.1 (14.1,20.5)	16.9 (13.1,21.1)	17.2 (13.5,21.4)	17.1 (13.9,20.9)	16.4 (13.4,20.0)	-1.6 (-3.5,0.5)
	Both	22.6 (19.0,27.0)	22.4 (19.1,26.5)	22.2 (19.0,26.0)	21.7 (18.6,25.5)	21.2 (18.2,25.0)	21.0 (18.1,24.6)	20.9 (18.4,24.0)	20.9 (18.4,23.9)	20.8 (18.3,23.7)	20.1 (17.7,23.0)	20.1 (17.7,22.9)	19.3 (16.8,22.0)	19.0 (16.3,22.1)	18.4 (15.6,21.7)	18.7 (15.8,22.2)	18.3 (15.2,22.1)	17.6 (14.6,21.3)	-1.6 (-3.2,0.1)
Dallas County, AL	Male	26.1 (22.3,30.5)	26.0 (22.3,30.1)	25.8 (22.1,29.9)	24.5 (20.9,28.5)	25.0 (21.4,29.2)	25.4 (21.8,29.7)	25.1 (21.9,28.8)	24.5 (21.4,28.1)	25.5 (22.5,28.9)	23.2 (20.2,26.7)	22.8 (20.0,25.9)	22.2 (19.4,25.3)	22.3 (19.5,25.6)	22.3 (19.1,25.8)	23.2 (18.9,28.1)	23.2 (19.6,27.5)	22.2 (18.7,26.6)	-1.0 (-2.5,0.5)
	Female	16.2 (12.5,21.3)	16.2 (12.8,20.7)	16.2 (13.0,20.3)	17.1 (13.9,20.9)	17.2 (14.2,20.9)	17.0 (14.2,20.5)	16.3 (13.7,19.4)	16.5 (14.2,19.4)	16.7 (14.5,19.4)	15.8 (13.8,17.9)	16.9 (14.9,19.2)	16.4 (14.0,18.9)	14.9 (12.3,17.7)	15.1 (11.7,18.6)	14.5 (11.2,18.1)	14.5 (11.9,17.9)	14.0 (11.4,17.2)	-0.9 (-3.1,1.1)
	Both	21.1 (17.4,25.7)	21.0 (17.5,25.4)	20.9 (17.5,24.8)	20.7 (17.3,24.6)	21.0 (17.6,24.9)	21.1 (18.0,25.0)	20.6 (17.8,24.0)	20.4 (17.7,23.7)	21.1 (18.4,24.1)	19.4 (17.0,22.1)	19.8 (17.5,22.4)	19.3 (17.0,21.8)	18.6 (16.1,21.4)	18.6 (16.0,21.8)	18.8 (16.0,22.4)	18.8 (15.7,22.6)	18.0 (15.0,21.8)	-1.0 (-2.7,0.7)
DeKalb County, AL	Male	29.3 (25.3,33.4)	29.0 (25.1,33.2)	28.4 (24.5,32.8)	28.0 (24.1,32.3)	27.1 (23.0,31.9)	26.5 (22.5,31.2)	25.8 (22.5,29.8)	25.7 (22.5,29.3)	24.8 (21.9,28.0)	24.1 (20.8,27.7)	23.4 (20.6,26.6)	22.9 (20.0,26.0)	21.7 (18.8,24.7)	21.6 (18.3,25.4)	22.3 (17.8,27.3)	22.8 (19.1,26.9)	21.9 (18.3,25.9)	-1.8 (-3.3,-0.4)
	Female	24.1 (19.2,29.7)	24.0 (19.5,29.0)	23.9 (19.7,28.5)	23.1 (19.1,27.7)	23.3 (19.3,28.1)	24.3 (20.7,28.7)	23.4 (20.1,27.1)	23.8 (20.8,27.1)	23.1 (20.5,26.0)	22.2 (19.6,25.0)	20.7 (18.2,23.4)	20.3 (17.0,23.5)	18.9 (15.2,22.5)	18.9 (14.4,23.4)	19.5 (14.9,24.0)	20.6 (16.8,25.0)	19.9 (16.2,24.3)	-1.2 (-3.1,0.5)
	Both	26.6 (22.3,31.4)	26.4 (22.2,30.8)	26.1 (22.1,30.5)	25.5 (21.6,29.9)	25.2 (21.1,29.9)	25.3 (21.6,29.9)	24.6 (21.3,28.4)	24.7 (21.7,28.2)	23.9 (21.2,27.0)	23.1 (20.5,26.0)	22.1 (19.3,24.9)	21.6 (18.8,24.4)	20.3 (17.2,23.4)	20.3 (17.0,23.8)	20.8 (17.4,24.7)	21.7 (17.9,25.9)	20.9 (17.2,25.1)	-1.5 (-3.2,0.0)
Elmore County, AL	Male	25.4 (21.7,29.3)	25.2 (21.7,28.9)	24.8 (21.4,28.6)	22.9 (19.7,26.5)	22.8 (19.4,26.5)	22.7 (19.4,26.4)	23.3 (20.3,26.4)	23.5 (20.5,26.7)	24.8 (21.9,27.8)	23.5 (20.5,26.8)	23.2 (20.4,26.1)	23.8 (21.1,26.9)	21.9 (19.2,24.7)	21.2 (18.3,24.3)	21.2 (17.2,25.3)	20.3 (17.0,23.9)	19.4 (16.2,22.9)	-1.7 (-3.1,-0.1)
	Female	19.0 (14.7,24.1)	19.1 (15.1,23.8)	19.1 (15.5,23.3)	19.4 (15.8,23.2)	20.1 (16.8,23.9)	21.0 (17.8,24.6)	21.0 (18.1,24.3)	20.3 (17.7,23.1)	21.1 (18.7,23.7)	20.5 (18.2,23.0)	19.2 (16.9,21.7)	18.9 (15.9,22.0)	19.1 (15.6,22.6)	19.0 (14.7,23.3)	19.4 (15.2,24.0)	19.7 (16.2,23.6)	18.9 (15.6,22.6)	0.0 (-2.0,2.0)
	Both	22.2 (18.2,26.7)	22.1 (18.4,26.3)	21.9 (18.3,25.7)	21.1 (17.7,24.7)	21.4 (18.0,25.2)	21.8 (18.7,25.5)	22.1 (19.1,25.3)	21.9 (19.1,24.8)	22.9 (20.3,25.6)	22.0 (19.4,24.7)	21.1 (18.7,23.8)	21.3 (18.7,24.2)	20.5 (17.6,23.6)	20.1 (17.0,23.3)	20.3 (17.2,23.7)	20.0 (16.7,23.7)	19.2 (15.9,22.7)	-0.9 (-2.6,0.7)
Escambia County, AL	Male	29.7 (25.9,34.1)	29.5 (25.6,34.0)	29.1 (25.3,33.4)	27.5 (23.7,31.9)	27.4 (23.7,31.5)	27.3 (23.5,31.6)	27.1 (23.8,30.8)	27.4 (24.2,31.0)	28.0 (24.9,31.4)	28.2 (24.7,32.3)	27.1 (23.8,30.8)	27.7 (24.4,31.5)	27.1 (23.9,30.7)	26.9 (23.3,31.0)	24.8 (19.9,29.9)	24.4 (20.7,28.7)	23.5 (19.8,27.8)	-1.5 (-2.8,0.0)
	Female	21.4 (16.7,26.9)	21.4 (17.1,26.3)	21.2 (17.3,26.0)	21.2 (17.3,25.8)	21.9 (18.2,26.4)	22.4 (18.9,26.2)	21.7 (18.5,25.3)	20.7 (17.9,23.9)	21.2 (18.6,24.2)	20.9 (18.4,23.8)	20.6 (18.0,23.4)	20.1 (17.1,23.6)	20.9 (17.6,24.8)	19.7 (15.5,24.2)	18.7 (14.5,23.5)	18.8 (15.4,22.9)	18.1 (14.8,22.1)	-1.0 (-3.0,1.0)
	Both	25.5 (21.3,30.4)	25.4 (21.4,30.0)	25.1 (21.3,29.6)	24.3 (20.5,28.7)	24.6 (20.9,28.9)	24.8 (21.3,28.8)	24.4 (21.2,27.9)	24.0 (21.1,27.4)	24.5 (21.8,27.8)	24.5 (21.6,27.9)	23.8 (20.9,27.0)	23.8 (20.9,27.1)	23.9 (21.0,27.5)	23.2 (20.2,27.1)	21.7 (18.5,25.6)	21.6 (18.0,25.7)	20.8 (17.3,24.9)	-1.3 (-2.9,0.4)
Etowah County, AL	Male	26.3 (22.8,30.0)	26.0 (22.5,29.7)	25.6 (22.2,29.3)	25.4 (21.9,29.0)	24.0 (20.6,27.8)	24.1 (20.7,27.9)	24.6 (21.6,27.9)	24.3 (21.5,27.5)	24.1 (21.4,27.1)	24.4 (21.3,27.9)	23.3 (20.7,26.2)	23.1 (20.4,26.1)	23.0 (20.3,26.0)	23.5 (20.4,26.9)	24.5 (20.1,29.0)	24.5 (20.8,28.5)	23.5 (19.9,27.4)	-0.7 (-2.0,0.6)
	Female	24.2 (20.1,29.3)	24.1 (20.4,28.5)	23.9 (20.5,27.8)	24.5 (20.9,28.5)	25.0 (21.4,28.7)	24.3 (21.3,27.8)	23.8 (21.0,26.9)	22.7 (20.2,25.5)	21.2 (19.1,23.7)	19.7 (17.6,22.0)	19.9 (17.7,22.2)	20.4 (17.7,23.3)	20.4 (17.3,23.7)	20.9 (17.0,24.8)	20.8 (16.9,24.9)	19.1 (15.8,22.9)	18.4 (15.2,22.0)	-1.7 (-3.4,-0.1)
	Both	25.2 (21.5,29.4)	25.0 (21.5,29.0)	24.7 (21.3,28.6)	25.0 (21.4,28.7)	24.5 (21.0,28.3)	24.2 (21.1,27.7)	24.2 (21.3,27.4)	23.5 (20.8,26.5)	22.6 (20.2,25.3)	22.0 (19.7,24.6)	21.6 (19.3,24.1)	21.8 (19.3,24.3)	21.7 (18.9,24.6)	22.2 (19.1,25.3)	22.6 (19.4,26.1)	21.8 (18.3,25.6)	20.9 (17.5,24.6)	-1.2 (-2.6,0.2)
Fayette County, AL	Male	27.6 (23.8,31.8)	27.5 (23.7,31.6)	27.0 (23.2,31.1)	26.9 (23.1,30.9)	26.7 (22.5,31.2)	26.5 (22.6,30.8)	26.7 (23.3,30.4)	26.5 (23.1,30.2)	27.1 (23.8,30.5)	25.7 (22.1,29.4)	23.8 (20.8,27.2)	23.3 (20.2,26.7)	22.9 (19.8,26.4)	21.9 (18.5,25.8)	21.7 (17.1,26.7)	23.1 (19.3,27.5)	22.1 (18.4,26.5)	-1.4 (-2.9,0.0)
	Female	22.4 (17.8,28.4)	22.4 (18.0,27.7)	22.3 (18.2,27.0)	22.6 (18.5,27.1)	22.2 (18.2,26.5)	22.6 (18.8,26.9)	22.3 (18.6,26.3)	21.3 (18.1,24.8)	21.6 (18.8,24.7)	20.3 (17.7,23.2)	19.5 (16.8,22.5)	19.8 (16.5,23.4)	19.6 (16.2,23.5)	19.0 (14.6,23.7)	19.7 (15.3,24.4)	20.6 (16.6,25.3)	19.9 (16.0,24.5)	-0.7 (-2.7,1.2)
	Both	25.0 (20.8,30.0)	24.9 (20.9,29.4)	24.6 (20.8,29.0)	24.7 (20.8,29.0)	24.4 (20.3,28.8)	24.5 (20.7,28.9)	24.4 (20.9,28.3)	23.9 (20.5,27.4)	24.3 (21.2,27.5)	23.0 (20.1,26.1)	21.6 (18.9,24.7)	21.5 (18.5,24.7)	21.2 (18.1,24.7)	20.4 (17.1,24.2)	20.7 (17.2,24.9)	21.8 (17.9,26.4)	21.0 (17.2,25.5)	-1.1 (-2.7,0.6)
Franklin County, AL	Male	28.0 (24.3,32.3)	27.6 (23.8,31.8)	27.0 (23.2,31.3)	26.3 (22.6,30.6)	25.5 (21.6,29.9)	25.3 (21.4,29.8)	25.2 (21.8,28.9)	25.5 (22.2,29.2)	25.7 (22.5,29.1)	25.3 (21.9,29.2)	24.4 (21.4,27.8)	24.0 (20.9,27.4)	23.4 (20.4,26.8)	22.8 (19.6,26.7)	21.5 (17.5,26.3)	21.2 (17.8,25.2)	20.3 (17.0,24.1)	-2.0 (-3.4,-0.6)
	Female	23.4 (18.4,29.0)	23.2 (19.1,28.4)	23.0 (18.9,27.9)	23.4 (19.3,28.3)	23.3 (19.1,28.2)	22.4 (18.7,26.8)	23.6 (20.1,27.8)	23.1 (19.8,26.9)	22.4 (19.5,25.7)	22.1 (19.4,25.1)	22.5 (19.8,25.6)	21.2 (18.0,24.7)	20.9 (17.4,24.8)	20.0 (15.8,24.5)	19.5 (15.3,23.9)	18.5 (15.0,22.7)	17.8 (14.5,21.8)	-1.7 (-3.7,0.2)
	Both	25.6 (21.5,30.5)	25.4 (21.4,29.9)	25.0 (21.1,29.5)	24.8 (20.9,29.3)	24.4 (20.3,29.0)	23.8 (20.1,28.3)	24.4 (21.0,28.3)	24.3 (21.0,28.1)	24.0 (21.0,27.4)	23.7 (20.7,26.9)	23.5 (20.6,26.6)	22.5 (19.6,25.9)	22.1 (19.1,25.7)	21.4 (18.3,25.0)	20.5 (17.1,24.2)	19.9 (16.3,23.8)	19.1 (15.8,23.0)	-1.8 (-3.5,-0.3)
Geneva County, AL	Male	27.5 (24.0,31.7)	27.3 (23.8,31.3)	26.9 (23.3,30.9)	26.1 (22.6,30.1)	26.2 (22.5,30.5)	26.4 (22.5,30.7)	26.9 (23.5,30.8)	28.8 (25.2,32.7)	29.3 (25.8,32.8)	28.7 (24.8,32.7)	28.2 (24.6,32.0)	27.8 (24.2,31.4)	25.8 (22.6,29.3)	23.8 (20.0,27.7)	22.8 (18.1,27.9)	23.1 (19.5,27.2)	22.1 (18.7,26.3)	-1.4 (-2.8,-0.1)
	Female	23.3 (18.6,28.9)	23.3 (18.9,28.4)	23.1 (19.1,27.9)	23.3 (19.5,27.8)	22.8 (19.0,27.2)	23.0 (19.3,27.1)	21.9 (18.5,25.6)	21.3 (18.1,24.8)	22.3 (19.2,25.5)	22.8 (19.9,25.9)	22.6 (19.8,25.6)	23.2 (19.9,26.8)	24.2 (20.5,28.1)	21.7 (17.5,26.1)	21.0 (16.8,25.5)	20.5 (16.8,24.9)	19.8 (16.3,24.1)	-1.0 (-2.8,0.8)
	Both	25.4 (21.3,30.3)	25.2 (21.4,29.8)	25.0 (21.3,29.2)	24.7 (21.0,28.9)	24.5 (20.7,28.8)	24.6 (20.9,28.9)	24.4 (21.0,28.1)	25.0 (21.7,28.5)	25.7 (22.4,29.1)	25.7 (22.4,29.0)	25.3 (22.1,28.6)	25.5 (22.2,28.8)	25.0 (21.6,28.3)	22.8 (19.3,26.2)	21.9 (18.4,25.9)	21.8 (18.1,26.1)	21.0 (17.5,25.2)	-1.2 (-2.8,0.3)
Greene County, AL	Male	23.5 (19.7,27.4)	23.4 (19.6,27.2)	23.3 (19.5,27.0)	23.3 (19.5,27.1)	23.5 (19.5,27.5)	23.6 (19.6,27.6)	24.0 (20.6,27.5)	24.1 (20.8,27.7)	24.3 (21.3,27.7)	23.3 (19.9,27.3)	22.0 (18.8,25.4)	21.7 (18.4,25.1)	21.2 (18.0,24.9)	20.5 (17.0,24.6)	19.6 (14.8,24.7)	21.3 (17.7,25.8)	20.5 (16.9,24.9)	-0.9 (-2.3,0.8)
	Female	14.4 (10.7,18.6)	14.4 (11.0,18.2)	14.3 (11.1,17.9)	15.0 (11.8,18.6)	14.4 (11.4,17.9)	14.9 (12.0,18.1)	15.3 (12.5,18.5)	15.5 (13.0,18.4)	15.4 (13.1,18.1)	15.5 (13.3,18.1)	15.0 (12.7,17.6)	14.7 (12.0,17.8)	13.8 (11.0,17.2)	13.6 (10.1,17.7)	12.9 (9.7,17.1)	13.7 (10.6,17.6)	13.2 (10.3,16.9)	-0.6 (-2.8,1.9)
	Both	18.8 (15.1,22.8)	18.8 (15.3,22.6)	18.7 (15.2,22.4)	19.1 (15.5,22.8)	18.9 (15.4,22.5)	19.2 (15.8,22.7)	19.6 (16.5,22.9)	19.7 (16.8,23.0)	19.8 (17.1,22.8)	19.3 (16.6,22.5)	18.4 (15.8,21.3)	18.1 (15.4,21.2)	17.4 (14.6,20.9)	17.0 (14.0,20.6)	16.2 (13.1,20.2)	17.4 (14.1,21.6)	16.7 (13.5,20.8)	-0.7 (-2.5,1.2)
Hale County, AL	Male	25.3 (21.6,29.3)	25.2 (21.6,29.1)	24.9 (21.3,29.0)	24.7 (21.1,28.7)	24.3 (20.7,28.7)	24.6 (20.8,29.0)	25.1 (21.7,28.9)	25.3 (22.0,29.2)	26.0 (22.8,29.5)	24.8 (21.3,28.5)	23.1 (20.2,26.3)	22.8 (19.7,26.2)	21.2 (18.3,24.5)	20.4 (17.0,24.1)	18.7 (14.6,23.4)	21.1 (17.4,25.2)	20.2 (16.7,24.2)	-1.4 (-2.9,0.0)
	Female	17.9 (13.7,23.2)	17.9 (14.0,22.5)	17.8 (14.2,22.0)	18.4 (14.9,22.6)	17.4 (14.2,21.5)	17.6 (14.5,21.2)	18.0 (15.1,21.5)	18.6 (15.8,22.1)	18.0 (15.6,21.0)	17.8 (15.4,20.6)	17.0 (14.6,19.7)	16.5 (13.8,19.7)	15.7 (12.8,19.0)	15.8 (12.3,19.6)	14.7 (11.1,18.6)	15.6 (12.3,19.5)	15.1 (11.9,18.8)	-1.1 (-3.2,1.0)
	Both	21.5 (17.8,26.1)	21.5 (17.9,25.7)	21.3 (17.8,25.3)	21.5 (17.9,25.6)	20.8 (17.4,25.1)	21.0 (17.7,25.1)	21.5 (18.4,25.1)	21.9 (18.9,25.6)	21.9 (19.1,25.2)	21.2 (18.5,24.3)	20.0 (17.4,23.0)	19.6 (17.0,22.6)	18.4 (15.7,21.7)	18.1 (15.1,21.5)	16.7 (13.5,20.3)	18.3 (14.8,22.3)	17.6 (14.2,21.5)	-1.3 (-3.0,0.4)
Henry County, AL	Male	25.2 (21.8,29.1)	24.7 (21.2,28.6)	24.3 (20.8,28.0)	23.0 (19.7,26.8)	22.5 (19.2,26.5)	23.6 (20.1,27.6)	23.9 (20.8,27.4)	24.1 (21.0,27.6)	24.5 (21.6,27.8)	23.4 (20.2,27.0)	22.6 (19.7,25.8)	22.7 (19.8,25.9)	22.0 (19.2,25.1)	21.5 (18.2,25.0)	21.0 (16.6,25.5)	20.3 (16.9,24.0)	19.5 (16.1,23.2)	-1.6 (-3.1,-0.2)
	Female	19.9 (15.6,25.1)	19.6 (15.8,24.3)	19.3 (15.7,23.6)	18.8 (15.4,23.0)	18.4 (15.0,22.4)	18.1 (15.0,21.9)	17.9 (14.9,21.4)	17.9 (15.2,21.1)	18.0 (15.5,21.0)	17.0 (14.7,19.6)	17.1 (14.8,19.6)	16.1 (13.3,18.9)	15.7 (12.6,18.8)	15.5 (11.7,19.1)	14.5 (10.7,18.3)	15.5 (12.3,19.2)	15.0 (11.9,18.5)	-1.8 (-3.9,0.1)
	Both	22.5 (18.8,27.1)	22.1 (18.6,26.3)	21.7 (18.3,25.7)	20.9 (17.4,24.8)	20.4 (17.1,24.5)	20.8 (17.6,24.7)	20.8 (17.9,24.4)	21.0 (18.1,24.3)	21.2 (18.5,24.3)	20.2 (17.6,23.2)	19.8 (17.2,22.5)	19.3 (16.8,22.1)	18.8 (16.1,21.7)	18.4 (15.5,21.5)	17.7 (14.5,21.0)	17.9 (14.6,21.6)	17.2 (13.9,20.9)	-1.7 (-3.5,0.0)
Houston County, AL	Male	24.8 (21.3,28.4)	24.6 (21.2,27.9)	24.2 (20.9,27.4)	23.5 (20.2,26.8)	23.3 (20.0,26.8)	23.6 (20.2,27.0)	23.9 (21.0,27.1)	24.2 (21.3,27.4)	23.9 (21.3,26.9)	22.6 (19.7,25.9)	21.5 (19.0,24.4)	20.6 (18.2,23.5)	20.5 (18.0,23.3)	20.4 (17.7,23.7)	20.3 (16.4,24.5)	20.5 (17.5,23.9)	19.6 (16.8,23.0)	-1.5 (-2.8,-0.2)
	Female	19.9 (15.6,24.9)	19.9 (16.0,24.3)	19.8 (16.3,23.5)	19.6 (16.4,23.1)	18.9 (15.8,22.1)	18.8 (15.9,21.9)	17.9 (15.3,20.7)	17.9 (15.6,20.6)	19.6 (17.3,22.2)	19.0 (17.0,21.4)	18.6 (16.6,20.9)	17.5 (15.0,20.3)	17.1 (14.4,20.1)	16.8 (13.4,20.3)	16.3 (13.0,20.1)	17.7 (15.0,21.1)	17.0 (14.5,20.3)	-1.0 (-2.7,0.8)
	Both	22.3 (18.5,26.7)	22.2 (18.6,26.0)	21.9 (18.6,25.4)	21.5 (18.2,24.8)	21.1 (17.9,24.4)	21.1 (18.1,24.3)	20.9 (18.1,23.8)	21.0 (18.4,23.9)	21.7 (19.2,24.5)	20.8 (18.4,23.5)	20.0 (17.9,22.6)	19.0 (16.8,21.7)	18.7 (16.3,21.5)	18.6 (16.1,21.6)	18.3 (15.6,21.4)	19.1 (16.2,22.5)	18.3 (15.6,21.6)	-1.2 (-2.7,0.2)
Jackson County, AL	Male	29.5 (25.8,33.6)	29.3 (25.8,33.4)	29.0 (25.4,33.0)	28.6 (25.1,32.7)	28.3 (24.6,32.6)	28.3 (24.6,32.6)	27.2 (24.0,30.8)	27.4 (24.2,30.9)	27.1 (24.2,30.4)	26.5 (23.2,30.1)	26.3 (23.3,29.6)	25.9 (22.8,29.2)	24.4 (21.5,27.5)	22.6 (19.3,26.2)	22.8 (18.1,27.6)	22.7 (19.0,26.5)	21.8 (18.2,25.6)	-1.9 (-3.3,-0.6)
	Female	25.5 (20.4,31.2)	25.3 (20.8,30.4)	25.0 (20.9,29.7)	24.1 (20.3,28.7)	24.8 (21.0,29.2)	26.2 (22.7,30.4)	25.2 (22.0,28.8)	25.7 (22.8,29.0)	26.7 (24.0,29.7)	24.8 (22.2,27.7)	24.1 (21.4,27.1)	25.0 (21.6,28.8)	22.3 (18.6,26.2)	20.5 (15.7,25.1)	21.8 (17.1,26.5)	23.5 (19.3,27.9)	22.7 (18.7,27.0)	-0.7 (-2.5,0.9)
	Both	27.5 (23.2,32.3)	27.3 (23.3,31.8)	26.9 (23.1,31.2)	26.3 (22.6,30.6)	26.5 (22.7,30.8)	27.3 (23.7,31.2)	26.2 (23.0,29.8)	26.5 (23.6,29.9)	26.9 (24.2,30.0)	25.7 (22.8,28.7)	25.2 (22.4,28.1)	25.4 (22.4,28.6)	23.3 (20.2,26.7)	21.5 (18.0,24.9)	22.3 (18.5,26.0)	23.1 (19.2,27.2)	22.3 (18.4,26.3)	-1.3 (-2.8,0.1)
Jefferson County, AL	Male	24.3 (21.7,27.0)	24.0 (21.6,26.5)	23.7 (21.2,26.1)	23.3 (20.9,25.7)	22.5 (20.2,24.9)	22.2 (20.0,24.6)	21.5 (19.6,23.6)	22.5 (20.6,24.5)	22.5 (20.7,24.3)	22.1 (20.0,24.1)	21.8 (20.1,23.5)	21.6 (19.8,23.4)	20.2 (18.4,22.2)	19.7 (17.5,22.0)	20.0 (17.1,23.0)	19.5 (17.1,22.3)	18.7 (16.3,21.4)	-1.6 (-2.7,-0.5)
	Female	16.7 (14.4,19.4)	16.5 (14.5,18.8)	16.3 (14.4,18.3)	15.6 (13.8,17.4)	15.9 (14.2,17.7)	16.2 (14.7,17.7)	16.7 (15.4,18.0)	16.6 (15.4,17.7)	16.7 (15.6,17.8)	16.2 (15.1,17.4)	15.5 (14.2,16.7)	14.0 (12.4,15.7)	13.5 (11.6,15.4)	13.0 (10.8,15.3)	12.9 (10.6,15.4)	13.6 (11.8,15.7)	13.1 (11.3,15.1)	-1.5 (-2.9,-0.2)
	Both	20.4 (18.1,23.1)	20.2 (18.1,22.6)	19.9 (17.8,22.0)	19.4 (17.3,21.4)	19.1 (17.1,21.2)	19.1 (17.3,21.0)	19.1 (17.4,20.8)	19.5 (18.0,21.0)	19.6 (18.2,21.0)	19.1 (17.7,20.5)	18.6 (17.2,20.0)	17.7 (16.2,19.3)	16.8 (15.1,18.6)	16.3 (14.5,18.3)	16.4 (14.5,18.6)	16.5 (14.4,18.9)	15.9 (13.8,18.2)	-1.6 (-2.7,-0.4)
Lamar County, AL	Male	27.9 (24.1,32.0)	27.6 (23.9,31.9)	27.3 (23.5,31.6)	26.3 (22.5,30.6)	25.6 (21.8,30.1)	25.0 (21.3,29.5)	25.3 (22.1,29.2)	25.8 (22.8,29.6)	26.6 (23.7,30.1)	25.8 (22.6,29.7)	25.0 (22.1,28.4)	23.6 (20.5,27.0)	23.6 (20.5,26.9)	22.8 (19.2,26.5)	21.9 (17.4,26.7)	22.9 (19.2,26.9)	22.0 (18.4,26.0)	-1.5 (-2.8,-0.1)
	Female	21.3 (16.6,26.4)	21.4 (17.1,26.3)	21.4 (17.4,26.1)	21.8 (17.8,26.6)	22.0 (18.1,26.8)	21.4 (17.9,26.0)	21.1 (17.9,25.3)	20.3 (17.6,23.9)	20.8 (18.2,23.9)	20.5 (18.0,23.4)	21.4 (18.9,24.2)	21.6 (18.7,25.1)	21.8 (18.5,25.5)	20.6 (16.6,25.0)	19.6 (15.6,24.0)	18.7 (14.9,22.9)	18.0 (14.5,22.0)	-1.0 (-2.9,0.8)
	Both	24.5 (20.3,29.1)	24.5 (20.6,28.9)	24.3 (20.4,28.8)	24.0 (20.2,28.6)	23.8 (20.0,28.5)	23.1 (19.5,27.6)	23.2 (20.0,27.2)	23.0 (20.1,26.7)	23.6 (20.9,26.9)	23.1 (20.4,26.4)	23.2 (20.5,26.2)	22.6 (20.0,25.7)	22.6 (19.7,26.1)	21.6 (18.6,25.3)	20.8 (17.4,24.5)	20.8 (17.0,24.8)	20.0 (16.4,24.0)	-1.3 (-2.8,0.3)
Lauderdale County, AL	Male	24.7 (21.1,28.3)	24.5 (21.1,27.9)	24.1 (20.7,27.5)	23.6 (20.3,27.1)	22.7 (19.2,26.2)	22.7 (19.3,26.3)	23.7 (20.6,26.8)	22.7 (19.8,25.8)	23.1 (20.3,26.0)	23.1 (20.1,26.4)	23.7 (21.1,26.5)	23.0 (20.5,25.9)	22.4 (19.9,25.2)	21.9 (19.0,25.0)	21.3 (17.4,25.6)	20.0 (17.0,23.4)	19.2 (16.1,22.5)	-1.6 (-2.9,-0.2)
	Female	20.0 (15.6,24.7)	20.0 (15.9,24.4)	20.0 (16.3,24.0)	21.6 (17.9,25.5)	20.1 (16.6,23.9)	19.1 (16.0,22.4)	19.2 (16.4,22.3)	20.0 (17.3,22.8)	19.3 (17.0,21.9)	19.1 (16.9,21.3)	18.2 (16.1,20.3)	17.7 (15.3,20.2)	16.3 (13.7,19.2)	15.6 (12.4,19.0)	14.8 (11.6,18.3)	15.5 (12.8,18.6)	15.0 (12.3,17.9)	-1.8 (-3.6,0.1)
	Both	22.3 (18.3,26.4)	22.2 (18.5,26.1)	22.0 (18.6,25.7)	22.6 (19.0,26.2)	21.4 (17.9,25.0)	20.9 (17.7,24.3)	21.4 (18.4,24.5)	21.3 (18.6,24.2)	21.2 (18.6,23.9)	21.1 (18.7,23.7)	20.9 (18.6,23.2)	20.3 (18.0,22.9)	19.3 (16.9,21.8)	18.7 (16.2,21.4)	18.0 (15.2,21.1)	17.7 (14.8,21.0)	17.0 (14.2,20.1)	-1.7 (-3.2,-0.1)
Lawrence County, AL	Male	28.7 (24.7,32.9)	28.5 (24.7,32.6)	28.1 (24.4,32.2)	27.2 (23.5,31.3)	26.0 (22.2,30.1)	25.9 (22.2,30.1)	26.1 (22.9,29.8)	25.9 (22.6,29.4)	26.1 (23.1,29.5)	27.1 (23.6,31.1)	26.3 (23.1,29.6)	25.0 (21.9,28.3)	23.6 (20.7,26.8)	23.1 (19.7,26.7)	21.3 (16.9,26.2)	22.1 (18.6,26.1)	21.2 (17.8,25.1)	-1.9 (-3.2,-0.4)
	Female	22.2 (17.6,28.0)	22.3 (18.0,27.6)	22.4 (18.2,27.1)	23.1 (19.0,27.8)	23.7 (19.7,28.2)	22.9 (19.1,26.9)	22.8 (19.3,26.6)	21.7 (18.6,25.0)	21.3 (18.7,24.2)	20.6 (18.1,23.3)	20.4 (18.0,23.3)	20.3 (17.2,23.9)	20.9 (17.4,24.9)	20.1 (16.0,25.0)	20.0 (15.7,24.9)	19.0 (15.3,23.2)	18.3 (14.7,22.2)	-1.2 (-3.2,0.8)
	Both	25.4 (21.2,30.4)	25.3 (21.3,29.9)	25.2 (21.3,29.5)	25.1 (21.2,29.4)	24.8 (21.0,29.1)	24.4 (20.7,28.5)	24.4 (21.0,28.1)	23.7 (20.6,27.2)	23.6 (20.8,26.7)	23.8 (21.0,26.9)	23.3 (20.5,26.3)	22.6 (19.9,25.8)	22.2 (19.3,25.6)	21.6 (18.4,25.3)	20.6 (17.4,24.5)	20.5 (17.0,24.6)	19.7 (16.2,23.6)	-1.6 (-3.2,0.1)
Lee County, AL	Male	21.0 (18.2,24.4)	20.9 (18.3,24.1)	20.6 (17.9,23.7)	19.7 (17.1,22.8)	19.5 (16.8,22.7)	18.7 (16.1,21.8)	18.6 (16.3,21.3)	18.0 (15.8,20.5)	18.8 (16.6,21.1)	18.0 (15.7,20.8)	18.0 (15.8,20.3)	17.6 (15.4,20.1)	18.3 (16.0,20.7)	17.8 (15.2,20.6)	18.6 (15.0,22.4)	18.0 (15.2,21.1)	17.3 (14.4,20.4)	-1.2 (-2.7,0.1)
	Female	16.3 (12.8,20.3)	16.2 (13.2,19.9)	16.0 (13.2,19.5)	14.8 (12.2,18.0)	15.3 (12.8,18.3)	16.1 (13.7,18.9)	16.6 (14.4,19.2)	16.5 (14.4,18.8)	17.5 (15.5,19.7)	16.3 (14.5,18.3)	15.0 (13.3,17.0)	14.3 (12.1,16.9)	12.9 (10.5,15.6)	12.2 (9.2,15.4)	12.5 (9.5,15.7)	13.0 (10.5,15.9)	12.4 (10.0,15.2)	-1.7 (-3.6,0.2)
	Both	18.6 (15.6,22.2)	18.5 (15.6,21.9)	18.3 (15.5,21.5)	17.2 (14.6,20.3)	17.4 (14.7,20.4)	17.4 (14.9,20.3)	17.6 (15.4,20.1)	17.2 (15.1,19.6)	18.2 (16.0,20.4)	17.1 (15.2,19.3)	16.5 (14.6,18.5)	15.9 (14.0,18.1)	15.5 (13.3,18.0)	14.9 (12.6,17.5)	15.5 (13.1,18.1)	15.5 (12.8,18.4)	14.8 (12.2,17.7)	-1.4 (-3.1,0.1)
Limestone County, AL	Male	26.5 (23.1,30.2)	26.2 (22.9,29.9)	25.9 (22.5,29.4)	24.7 (21.4,28.2)	24.1 (20.7,27.6)	24.3 (20.8,27.9)	24.3 (21.3,27.5)	23.2 (20.3,26.3)	23.6 (20.8,26.4)	24.1 (20.9,27.2)	24.0 (21.1,26.9)	23.1 (20.3,26.1)	21.6 (18.9,24.5)	21.6 (18.8,25.0)	20.0 (16.0,24.6)	19.1 (16.1,22.6)	18.3 (15.3,21.7)	-2.3 (-3.6,-0.9)
	Female	21.9 (17.3,26.7)	21.7 (17.7,26.0)	21.5 (18.0,25.5)	21.2 (17.9,25.0)	20.0 (16.7,23.5)	20.8 (17.6,24.1)	20.1 (17.1,23.2)	20.4 (17.6,23.3)	19.7 (17.2,22.3)	19.2 (16.8,21.7)	18.5 (16.2,21.0)	19.2 (16.5,22.5)	17.9 (15.1,21.2)	17.5 (14.0,21.5)	17.7 (14.3,21.7)	16.6 (13.3,20.3)	15.9 (12.9,19.5)	-2.0 (-3.7,-0.1)
	Both	24.1 (20.2,28.3)	24.0 (20.4,27.9)	23.7 (20.3,27.4)	22.9 (19.6,26.6)	22.0 (18.7,25.4)	22.5 (19.2,25.8)	22.2 (19.2,25.3)	21.8 (18.9,24.7)	21.6 (19.0,24.3)	21.6 (19.0,24.4)	21.2 (18.8,23.8)	21.1 (18.5,24.1)	19.7 (17.1,22.8)	19.5 (16.8,22.8)	18.9 (15.9,22.2)	17.8 (14.7,21.4)	17.1 (14.2,20.6)	-2.2 (-3.7,-0.6)
Lowndes County, AL	Male	25.5 (21.7,29.6)	25.4 (21.6,29.5)	25.1 (21.5,29.3)	24.1 (20.5,28.3)	23.9 (20.2,28.1)	24.5 (20.8,28.7)	24.7 (21.5,28.2)	24.1 (21.1,27.5)	24.6 (21.7,27.8)	23.4 (20.1,27.1)	22.4 (19.4,25.7)	21.7 (18.6,25.2)	22.0 (18.8,25.5)	20.7 (17.2,24.9)	20.7 (16.1,25.9)	20.5 (16.9,25.0)	19.7 (16.1,24.1)	-1.6 (-3.1,0.0)
	Female	14.6 (11.1,18.9)	14.6 (11.3,18.5)	14.5 (11.5,18.1)	15.1 (12.1,18.6)	15.3 (12.3,18.9)	15.6 (12.8,18.8)	15.1 (12.6,18.1)	15.4 (13.1,18.3)	16.2 (13.9,18.8)	15.7 (13.4,18.4)	15.3 (12.9,18.0)	15.8 (13.1,19.3)	15.0 (12.1,18.9)	14.6 (11.1,19.0)	14.1 (10.6,18.4)	14.2 (11.1,18.5)	13.7 (10.7,17.8)	-0.4 (-2.7,2.0)
	Both	20.0 (16.4,24.1)	19.9 (16.5,23.7)	19.7 (16.4,23.6)	19.5 (16.2,23.4)	19.5 (16.2,23.4)	19.9 (16.8,23.6)	19.8 (17.0,23.0)	19.7 (17.1,22.8)	20.3 (17.7,23.2)	19.5 (16.8,22.5)	18.8 (16.2,21.7)	18.7 (15.9,21.9)	18.4 (15.6,22.1)	17.6 (14.6,21.6)	17.3 (14.1,21.5)	17.3 (13.9,21.7)	16.6 (13.4,20.9)	-1.1 (-2.9,0.7)
Macon County, AL	Male	22.6 (19.1,26.3)	22.5 (19.1,26.2)	22.3 (19.0,25.9)	20.8 (17.6,24.3)	20.8 (17.6,24.8)	21.4 (18.1,25.3)	21.2 (18.3,24.6)	21.0 (18.4,24.4)	22.5 (19.9,25.7)	21.2 (18.4,24.8)	20.1 (17.4,23.2)	19.9 (16.9,23.1)	19.4 (16.5,22.6)	19.3 (15.8,23.0)	20.3 (15.8,25.3)	20.6 (16.8,24.9)	19.8 (15.9,24.1)	-0.8 (-2.6,0.7)
	Female	12.6 (9.5,16.7)	12.5 (9.6,16.2)	12.5 (9.8,15.7)	13.3 (10.6,16.5)	14.0 (11.3,17.3)	14.1 (11.6,17.3)	14.4 (12.1,17.5)	14.1 (12.0,16.8)	14.3 (12.4,16.8)	13.1 (11.3,15.3)	12.9 (10.8,15.0)	12.8 (10.3,15.3)	12.7 (9.8,15.7)	12.6 (9.1,16.2)	13.0 (9.4,16.7)	13.0 (9.8,16.6)	12.5 (9.5,16.0)	0.0 (-2.5,2.2)
	Both	17.5 (14.3,21.3)	17.4 (14.3,20.9)	17.3 (14.3,20.7)	17.0 (14.0,20.4)	17.3 (14.4,20.9)	17.7 (14.8,21.2)	17.8 (15.2,20.9)	17.5 (15.1,20.5)	18.3 (16.0,21.2)	17.1 (14.9,19.8)	16.4 (14.1,19.0)	16.3 (13.7,19.0)	16.0 (13.2,18.8)	15.9 (12.9,19.1)	16.6 (13.4,20.2)	16.7 (13.2,20.7)	16.1 (12.7,20.0)	-0.5 (-2.5,1.2)
Madison County, AL	Male	20.0 (17.3,22.8)	19.8 (17.2,22.6)	19.5 (16.9,22.2)	18.9 (16.4,21.7)	18.6 (15.9,21.3)	18.6 (16.0,21.4)	18.2 (15.9,20.7)	18.3 (16.1,20.6)	18.1 (16.0,20.3)	18.3 (16.0,20.6)	18.3 (16.3,20.3)	18.3 (16.4,20.3)	17.9 (16.0,19.9)	17.7 (15.7,19.9)	16.2 (13.4,19.0)	14.6 (12.4,17.2)	14.0 (11.8,16.4)	-2.3 (-3.6,-0.9)
	Female	15.2 (12.3,18.1)	15.3 (12.7,17.9)	15.3 (12.9,17.8)	15.9 (13.5,18.6)	16.2 (13.8,18.9)	16.8 (14.6,19.3)	15.6 (13.7,17.7)	15.4 (13.7,17.2)	15.7 (14.1,17.4)	14.2 (12.8,15.8)	14.0 (12.5,15.7)	15.2 (13.3,17.2)	14.3 (12.1,16.6)	13.6 (11.1,16.4)	14.7 (12.0,17.6)	14.7 (12.5,17.2)	14.1 (12.0,16.4)	-0.5 (-2.0,1.2)
	Both	17.6 (14.8,20.2)	17.5 (15.0,20.1)	17.4 (14.9,20.0)	17.4 (14.9,20.0)	17.4 (14.9,20.2)	17.7 (15.2,20.3)	16.9 (14.8,19.1)	16.8 (14.9,18.9)	16.9 (15.1,18.8)	16.2 (14.5,18.0)	16.1 (14.4,17.9)	16.7 (14.9,18.6)	16.1 (14.3,18.1)	15.6 (13.7,17.7)	15.4 (13.4,17.7)	14.7 (12.5,17.1)	14.0 (11.9,16.4)	-1.4 (-2.8,0.0)
Marengo County, AL	Male	25.4 (22.0,29.1)	25.3 (21.9,29.0)	25.0 (21.5,28.8)	23.8 (20.5,27.6)	24.0 (20.3,28.0)	23.4 (19.9,27.2)	23.3 (20.3,26.7)	22.4 (19.5,25.5)	23.0 (20.3,26.0)	21.7 (18.8,24.6)	20.7 (18.2,23.4)	19.9 (17.4,22.7)	18.5 (16.1,21.2)	17.6 (14.9,20.5)	16.4 (12.8,20.0)	18.4 (15.4,21.6)	17.6 (14.7,20.8)	-2.3 (-3.7,-1.0)
	Female	17.4 (13.3,22.0)	17.2 (13.5,21.1)	17.1 (13.8,20.8)	17.9 (14.6,21.7)	17.3 (14.0,21.1)	16.7 (13.7,20.1)	16.4 (13.6,19.6)	16.1 (13.6,19.0)	16.0 (13.7,18.6)	15.2 (13.2,17.4)	15.5 (13.6,17.7)	14.7 (12.6,17.1)	13.3 (11.1,15.7)	12.5 (9.9,15.5)	11.9 (9.2,14.8)	12.1 (9.7,14.9)	11.7 (9.3,14.3)	-2.5 (-4.4,-0.4)
	Both	21.3 (17.6,25.2)	21.2 (17.8,24.9)	21.0 (17.7,24.7)	20.8 (17.5,24.5)	20.6 (17.1,24.4)	20.0 (16.8,23.6)	19.8 (16.9,23.0)	19.2 (16.6,22.3)	19.5 (17.0,22.2)	18.4 (16.1,20.8)	18.0 (15.8,20.4)	17.3 (15.0,19.7)	15.8 (13.5,18.2)	15.0 (12.7,17.5)	14.1 (11.6,16.9)	15.2 (12.5,18.2)	14.6 (12.0,17.5)	-2.4 (-4.0,-0.8)
Marion County, AL	Male	29.7 (25.9,33.7)	29.3 (25.6,33.2)	28.9 (25.1,32.6)	28.0 (24.3,31.8)	26.9 (23.3,30.9)	26.0 (22.2,29.9)	26.3 (22.9,29.6)	26.7 (23.3,29.9)	27.8 (24.7,30.8)	27.1 (23.8,30.6)	26.0 (23.0,29.1)	25.3 (22.3,28.5)	24.4 (21.5,27.6)	24.2 (20.8,27.8)	23.3 (18.8,28.3)	24.0 (20.3,28.1)	23.0 (19.3,27.0)	-1.6 (-2.9,-0.3)
	Female	24.2 (19.0,30.1)	24.0 (19.5,29.3)	23.8 (19.5,28.5)	24.3 (20.3,28.6)	23.6 (19.7,27.7)	22.7 (19.2,26.4)	22.2 (18.9,25.4)	21.5 (18.7,24.5)	21.1 (18.5,23.7)	20.7 (18.2,23.2)	21.3 (18.7,24.0)	21.3 (18.2,24.6)	21.5 (18.1,25.1)	20.3 (16.2,24.7)	20.0 (16.0,24.5)	19.3 (15.6,23.4)	18.7 (15.2,22.6)	-1.6 (-3.4,0.2)
	Both	26.9 (22.5,31.9)	26.6 (22.4,31.2)	26.3 (22.5,30.5)	26.1 (22.3,30.2)	25.2 (21.4,29.3)	24.4 (20.7,28.1)	24.2 (20.9,27.5)	24.1 (21.0,27.1)	24.4 (21.6,27.2)	23.8 (21.1,26.7)	23.6 (20.9,26.3)	23.3 (20.4,26.2)	22.9 (19.9,26.2)	22.2 (19.1,25.8)	21.7 (18.3,25.4)	21.6 (17.9,25.7)	20.8 (17.2,24.7)	-1.6 (-3.1,-0.1)
Marshall County, AL	Male	27.6 (24.1,31.5)	27.2 (23.7,31.0)	26.6 (23.1,30.2)	26.2 (22.8,29.9)	24.9 (21.5,28.4)	24.5 (21.0,28.0)	24.6 (21.5,27.8)	25.4 (22.2,28.5)	24.9 (22.1,27.8)	25.3 (22.1,28.6)	25.8 (23.0,28.8)	25.9 (22.9,29.0)	24.4 (21.6,27.4)	23.9 (20.7,27.3)	23.2 (18.9,27.8)	22.2 (18.9,25.9)	21.3 (18.0,25.0)	-1.6 (-2.9,-0.3)
	Female	23.9 (19.5,29.3)	23.8 (19.8,28.7)	23.6 (20.0,28.1)	24.3 (20.5,28.6)	25.4 (21.5,29.5)	26.2 (22.6,29.9)	25.9 (22.7,29.2)	26.2 (23.3,29.1)	26.3 (23.8,29.1)	23.2 (20.8,25.7)	23.1 (20.6,25.9)	22.4 (19.3,26.0)	21.0 (17.7,24.9)	19.4 (15.3,23.9)	21.5 (17.3,26.1)	21.5 (17.9,25.6)	20.7 (17.3,24.6)	-0.9 (-2.5,0.9)
	Both	25.7 (21.8,30.4)	25.5 (21.9,29.9)	25.1 (21.5,29.1)	25.2 (21.6,29.2)	25.2 (21.6,29.0)	25.3 (21.9,28.9)	25.3 (22.2,28.5)	25.8 (22.7,28.9)	25.7 (22.9,28.4)	24.2 (21.6,26.8)	24.4 (21.8,27.1)	24.1 (21.3,27.3)	22.7 (19.6,26.0)	21.6 (18.5,25.1)	22.3 (19.1,25.9)	21.9 (18.4,25.8)	21.0 (17.6,24.8)	-1.3 (-2.7,0.3)
Mobile County, AL	Male	24.9 (22.1,28.4)	24.8 (22.1,28.2)	24.5 (21.9,27.7)	23.9 (21.3,27.0)	23.8 (21.3,26.9)	24.1 (21.5,27.2)	23.5 (21.2,26.3)	24.3 (22.0,27.0)	25.2 (23.1,27.7)	25.4 (23.0,28.1)	23.7 (21.7,25.9)	24.6 (22.5,26.8)	23.5 (21.5,25.8)	22.1 (19.6,24.8)	21.9 (18.5,25.5)	22.0 (19.2,25.1)	21.1 (18.3,24.1)	-1.0 (-2.2,0.1)
	Female	19.5 (16.5,23.0)	19.5 (16.9,22.6)	19.5 (17.1,22.3)	20.3 (17.9,23.1)	19.7 (17.5,22.4)	19.7 (17.8,22.0)	19.0 (17.2,21.0)	18.7 (17.2,20.5)	18.3 (16.9,19.9)	19.4 (18.0,20.9)	18.6 (17.2,20.2)	18.3 (16.6,20.2)	18.6 (16.5,20.8)	18.2 (15.7,20.8)	16.9 (14.3,19.6)	15.9 (13.7,18.2)	15.3 (13.1,17.4)	-1.5 (-2.8,-0.2)
	Both	22.2 (19.3,25.5)	22.1 (19.5,25.2)	21.9 (19.5,25.0)	22.1 (19.6,25.1)	21.7 (19.4,24.6)	21.9 (19.6,24.6)	21.2 (19.2,23.6)	21.5 (19.6,23.6)	21.7 (20.0,23.7)	22.3 (20.6,24.3)	21.1 (19.5,22.9)	21.4 (19.8,23.2)	21.0 (19.2,23.1)	20.1 (18.1,22.4)	19.4 (17.0,21.8)	18.9 (16.4,21.5)	18.1 (15.6,20.7)	-1.3 (-2.5,-0.1)
Monroe County, AL	Male	26.4 (22.7,30.6)	26.1 (22.4,30.1)	25.8 (22.1,29.9)	24.8 (21.1,28.9)	24.5 (20.7,28.6)	24.4 (20.6,28.6)	23.6 (20.4,27.0)	22.9 (19.8,26.1)	23.6 (20.6,26.7)	22.9 (19.6,26.3)	23.1 (20.1,26.2)	23.4 (20.2,26.7)	23.4 (20.4,26.8)	23.4 (19.8,27.2)	23.4 (18.6,28.3)	23.4 (19.8,27.5)	22.4 (18.8,26.4)	-1.0 (-2.5,0.4)
	Female	18.4 (14.2,23.6)	18.3 (14.5,23.0)	18.2 (14.7,22.4)	18.1 (14.6,22.1)	18.8 (15.2,23.0)	20.1 (16.7,23.9)	19.3 (16.2,22.6)	19.5 (16.6,22.7)	20.2 (17.4,23.2)	19.7 (17.2,22.6)	18.3 (15.9,21.1)	18.6 (15.7,21.9)	18.0 (14.7,21.6)	17.1 (13.2,21.3)	16.8 (12.9,20.9)	17.7 (14.4,21.7)	17.2 (14.0,21.0)	-0.4 (-2.6,1.6)
	Both	22.3 (18.5,27.0)	22.2 (18.6,26.4)	21.9 (18.3,25.9)	21.4 (17.8,25.4)	21.6 (17.8,25.6)	22.2 (18.6,26.1)	21.4 (18.2,24.8)	21.2 (18.2,24.3)	21.9 (19.1,24.8)	21.3 (18.5,24.2)	20.6 (18.0,23.6)	20.9 (18.2,24.0)	20.7 (17.8,24.0)	20.2 (17.2,23.8)	20.1 (16.8,23.7)	20.5 (17.0,24.5)	19.7 (16.4,23.7)	-0.8 (-2.5,0.8)
Montgomery County, AL	Male	22.5 (19.6,25.9)	22.2 (19.4,25.4)	21.9 (19.2,25.1)	21.2 (18.5,24.5)	20.7 (17.9,23.9)	20.7 (17.9,23.9)	21.0 (18.4,23.7)	20.4 (17.9,22.9)	20.4 (18.1,22.6)	19.6 (17.1,22.0)	18.7 (16.7,20.6)	18.0 (16.0,20.0)	18.0 (15.9,20.1)	18.1 (15.7,20.4)	17.7 (14.2,21.1)	17.6 (15.0,20.6)	16.9 (14.3,19.8)	-1.8 (-3.2,-0.5)
	Female	15.2 (12.3,18.7)	15.0 (12.5,18.3)	14.9 (12.5,17.7)	15.2 (12.8,18.0)	14.8 (12.5,17.6)	14.6 (12.6,17.0)	14.4 (12.6,16.4)	14.5 (12.9,16.2)	14.7 (13.2,16.2)	13.3 (12.0,14.6)	13.3 (11.9,14.8)	13.6 (11.7,15.6)	13.4 (11.1,15.7)	13.1 (10.3,15.9)	13.9 (11.1,16.7)	13.2 (11.0,15.7)	12.7 (10.6,15.1)	-1.1 (-2.9,0.6)
	Both	18.8 (16.0,22.2)	18.6 (16.0,21.7)	18.3 (15.8,21.3)	18.1 (15.6,21.2)	17.7 (15.2,20.7)	17.6 (15.2,20.4)	17.6 (15.5,20.0)	17.4 (15.4,19.5)	17.5 (15.6,19.4)	16.4 (14.7,18.0)	15.9 (14.3,17.6)	15.8 (14.0,17.6)	15.6 (13.7,17.8)	15.5 (13.4,17.9)	15.7 (13.4,18.2)	15.4 (12.9,18.1)	14.7 (12.4,17.4)	-1.5 (-3.0,0.0)
Morgan County, AL	Male	26.7 (23.1,30.5)	26.5 (23.0,30.1)	26.0 (22.5,29.5)	25.3 (21.9,28.9)	24.0 (20.6,27.3)	23.4 (20.0,26.9)	23.7 (20.7,26.7)	23.9 (21.0,26.9)	24.1 (21.3,27.0)	24.9 (21.7,28.2)	25.3 (22.5,28.2)	24.3 (21.4,27.1)	23.7 (20.9,26.4)	23.7 (20.6,26.8)	21.6 (17.4,25.7)	20.8 (17.6,24.1)	19.9 (16.8,23.2)	-1.8 (-3.2,-0.5)
	Female	23.6 (19.1,28.6)	23.3 (19.2,27.7)	22.9 (19.2,27.0)	22.5 (18.9,26.2)	23.0 (19.4,26.5)	23.3 (20.1,26.7)	23.2 (20.3,26.3)	22.2 (19.6,24.9)	22.1 (19.7,24.6)	19.6 (17.4,21.8)	19.1 (16.9,21.3)	19.2 (16.4,22.1)	19.8 (16.5,23.1)	18.2 (14.2,22.4)	19.6 (15.6,23.7)	18.6 (15.3,22.2)	18.0 (14.9,21.4)	-1.7 (-3.4,0.1)
	Both	25.2 (21.1,29.4)	24.9 (21.2,28.7)	24.5 (20.9,28.2)	23.9 (20.4,27.5)	23.5 (20.0,26.9)	23.4 (20.1,26.7)	23.5 (20.5,26.5)	23.1 (20.3,25.9)	23.1 (20.4,25.7)	22.2 (19.7,24.7)	22.2 (19.7,24.5)	21.7 (19.2,24.2)	21.7 (18.9,24.5)	20.9 (17.9,23.9)	20.6 (17.6,23.6)	19.7 (16.4,23.1)	19.0 (15.8,22.3)	-1.8 (-3.3,-0.2)
Perry County, AL	Male	25.7 (21.7,29.9)	25.6 (21.6,29.7)	25.3 (21.4,29.3)	23.7 (19.9,27.6)	23.7 (19.9,27.7)	23.6 (19.8,27.6)	23.5 (20.3,27.1)	23.4 (20.3,26.8)	24.4 (21.5,27.8)	22.6 (19.4,26.3)	21.7 (18.9,25.1)	20.9 (17.9,24.3)	20.0 (17.1,23.4)	18.9 (15.6,22.7)	19.9 (15.3,25.0)	20.4 (16.8,24.4)	19.5 (16.0,23.5)	-1.7 (-3.4,0.0)
	Female	15.9 (12.0,20.6)	15.8 (12.2,20.0)	15.7 (12.4,19.6)	16.9 (13.5,20.8)	16.9 (13.5,20.7)	16.7 (13.7,20.1)	16.2 (13.5,19.2)	15.9 (13.6,18.8)	15.4 (13.3,18.1)	14.3 (12.4,16.8)	14.4 (12.2,17.0)	14.4 (11.6,17.6)	14.1 (10.9,17.6)	14.7 (10.7,19.0)	15.5 (11.6,19.9)	15.1 (11.7,19.2)	14.6 (11.3,18.5)	-0.6 (-3.0,1.9)
	Both	20.7 (16.9,25.1)	20.6 (16.9,24.7)	20.4 (16.8,24.4)	20.3 (16.6,24.1)	20.2 (16.6,24.1)	20.1 (16.7,23.8)	19.8 (17.0,23.1)	19.6 (16.9,22.6)	19.9 (17.4,22.9)	18.4 (16.0,21.3)	17.9 (15.5,21.0)	17.6 (15.0,20.7)	17.0 (14.2,20.4)	16.8 (13.7,20.5)	17.7 (14.4,21.6)	17.7 (14.2,21.7)	17.0 (13.6,20.9)	-1.2 (-3.2,0.7)
Pickens County, AL	Male	24.9 (21.4,29.0)	24.7 (21.2,28.7)	24.3 (21.0,28.3)	24.0 (20.7,28.0)	23.7 (20.1,27.7)	23.6 (20.2,27.7)	23.7 (20.5,27.2)	23.6 (20.4,27.0)	23.4 (20.5,26.3)	22.4 (19.2,25.7)	21.0 (18.2,24.2)	20.1 (17.2,23.5)	20.3 (17.3,23.5)	21.6 (18.2,25.5)	21.0 (16.3,25.9)	22.1 (18.3,26.4)	21.2 (17.6,25.3)	-1.0 (-2.6,0.4)
	Female	17.9 (13.8,23.0)	17.9 (14.3,22.4)	17.7 (14.4,21.8)	17.8 (14.7,21.8)	17.6 (14.5,21.5)	18.2 (15.1,21.9)	18.1 (15.2,21.5)	17.9 (15.3,20.7)	18.5 (15.9,21.2)	18.2 (15.9,20.9)	17.2 (14.8,20.0)	17.2 (14.2,20.5)	16.5 (13.1,20.0)	16.8 (12.6,21.2)	17.0 (12.9,21.5)	18.0 (14.2,22.3)	17.4 (13.8,21.5)	-0.2 (-2.4,1.9)
	Both	21.4 (17.8,25.8)	21.2 (17.8,25.3)	21.0 (17.7,24.9)	20.9 (17.6,24.9)	20.6 (17.2,24.5)	20.8 (17.5,24.6)	20.8 (17.7,24.3)	20.7 (17.8,23.7)	20.9 (18.1,23.7)	20.3 (17.6,23.1)	19.1 (16.5,21.9)	18.7 (16.0,21.6)	18.4 (15.4,21.6)	19.2 (15.9,22.7)	19.0 (15.6,22.9)	20.0 (16.2,24.3)	19.3 (15.7,23.4)	-0.6 (-2.5,1.0)
Pike County, AL	Male	24.3 (20.6,27.7)	24.0 (20.4,27.4)	23.6 (20.1,27.0)	22.8 (19.2,26.2)	22.2 (18.7,25.8)	21.8 (18.4,25.3)	22.2 (19.3,25.3)	22.2 (19.2,25.2)	22.1 (19.3,25.0)	20.5 (17.6,23.4)	19.9 (17.1,22.7)	19.3 (16.6,22.2)	18.5 (16.0,21.5)	18.7 (15.9,21.9)	19.8 (15.8,23.8)	19.1 (16.2,22.7)	18.3 (15.4,21.8)	-1.8 (-3.1,-0.2)
	Female	17.4 (13.0,21.7)	17.3 (13.4,21.1)	17.2 (13.6,20.8)	17.9 (14.3,21.5)	17.3 (14.0,20.8)	17.4 (14.4,20.7)	17.2 (14.4,20.2)	17.1 (14.5,20.1)	17.0 (14.6,19.6)	16.6 (14.4,19.1)	16.9 (14.6,19.4)	17.0 (14.6,20.1)	16.2 (13.6,19.4)	15.1 (12.2,18.9)	15.6 (12.6,19.4)	14.6 (11.9,17.9)	14.0 (11.4,17.3)	-1.3 (-3.3,1.0)
	Both	20.8 (16.8,24.5)	20.6 (16.9,24.1)	20.4 (16.8,23.9)	20.3 (16.7,23.8)	19.7 (16.4,23.2)	19.6 (16.5,23.0)	19.7 (16.8,22.8)	19.6 (16.8,22.5)	19.5 (16.9,22.2)	18.5 (16.1,21.1)	18.3 (15.8,21.0)	18.1 (15.7,21.0)	17.3 (14.9,20.3)	16.9 (14.4,20.0)	17.6 (15.0,20.9)	16.8 (14.0,20.3)	16.1 (13.4,19.5)	-1.6 (-3.1,0.3)
Randolph County, AL	Male	28.8 (25.1,32.8)	28.5 (24.9,32.7)	28.2 (24.6,32.4)	26.9 (23.4,31.1)	26.7 (23.2,31.0)	26.2 (22.5,30.6)	25.8 (22.6,29.4)	25.1 (22.0,28.7)	25.0 (22.1,28.2)	24.2 (20.8,27.8)	24.0 (21.1,27.3)	24.1 (21.1,27.5)	24.0 (20.9,27.4)	24.3 (20.6,28.2)	25.3 (20.3,30.3)	24.9 (21.1,29.3)	24.0 (20.1,28.3)	-1.1 (-2.5,0.2)
	Female	20.3 (15.8,25.9)	20.4 (16.3,25.2)	20.4 (16.6,24.8)	21.1 (17.4,25.6)	21.2 (17.7,25.8)	21.3 (18.1,25.3)	21.3 (18.3,25.0)	21.4 (18.8,24.6)	22.5 (19.9,25.5)	21.1 (18.7,24.0)	21.8 (19.2,24.7)	20.8 (17.6,24.3)	21.0 (17.4,25.0)	20.5 (16.0,25.3)	21.3 (16.7,26.3)	20.9 (16.9,25.6)	20.2 (16.4,24.6)	-0.1 (-2.0,2.1)
	Both	24.5 (20.5,29.1)	24.4 (20.6,28.7)	24.2 (20.6,28.5)	24.0 (20.3,28.3)	23.9 (20.4,28.3)	23.7 (20.4,27.9)	23.5 (20.4,27.3)	23.2 (20.4,26.5)	23.7 (21.0,26.9)	22.6 (20.0,25.5)	22.9 (20.2,25.9)	22.4 (19.5,25.6)	22.5 (19.2,26.0)	22.3 (18.7,26.3)	23.2 (19.5,27.3)	22.9 (19.0,27.4)	22.0 (18.2,26.3)	-0.7 (-2.2,1.0)
Russell County, AL	Male	29.1 (25.3,33.4)	28.9 (25.2,33.1)	28.6 (24.7,32.7)	27.3 (23.6,31.3)	27.0 (23.0,31.1)	26.9 (22.9,31.0)	26.0 (22.7,29.6)	25.3 (22.0,28.8)	26.8 (23.6,30.0)	26.3 (22.9,30.0)	25.7 (22.6,29.0)	25.0 (21.7,28.4)	26.1 (22.8,29.6)	25.1 (21.3,28.9)	24.7 (19.8,29.8)	24.6 (20.6,29.0)	23.5 (19.6,27.9)	-1.3 (-2.7,0.1)
	Female	21.0 (16.4,26.1)	21.1 (17.0,25.8)	21.1 (17.3,25.5)	20.7 (17.1,24.9)	20.6 (16.9,24.7)	21.0 (17.5,24.8)	20.7 (17.5,24.2)	19.5 (16.7,22.6)	19.9 (17.3,22.7)	19.0 (16.7,21.7)	18.5 (16.1,21.2)	18.3 (15.4,21.7)	18.0 (14.9,21.7)	17.2 (13.4,21.7)	16.4 (12.6,21.0)	16.8 (13.5,20.8)	16.1 (12.9,20.0)	-1.7 (-3.6,0.4)
	Both	25.0 (20.9,29.6)	24.9 (21.1,29.3)	24.8 (21.1,28.9)	24.0 (20.3,28.1)	23.7 (19.9,27.7)	23.9 (20.2,27.8)	23.3 (20.0,26.8)	22.3 (19.3,25.5)	23.3 (20.4,26.3)	22.6 (19.8,25.7)	22.0 (19.3,25.0)	21.6 (18.8,24.7)	22.0 (19.1,25.3)	21.0 (17.8,24.7)	20.5 (17.0,24.4)	20.6 (16.9,24.9)	19.7 (16.2,23.9)	-1.5 (-3.1,0.3)
Shelby County, AL	Male	18.5 (15.8,21.6)	18.3 (15.7,21.3)	18.0 (15.5,21.0)	17.4 (14.9,20.3)	16.7 (14.3,19.6)	16.2 (13.8,19.1)	15.6 (13.6,17.9)	16.0 (14.0,18.3)	16.2 (14.3,18.3)	15.3 (13.2,17.6)	15.3 (13.5,17.3)	15.0 (13.1,17.1)	14.4 (12.6,16.5)	14.5 (12.5,17.0)	14.5 (11.8,17.6)	14.2 (11.8,16.9)	13.5 (11.2,16.1)	-2.0 (-3.4,-0.4)
	Female	16.1 (12.6,20.1)	15.9 (12.8,19.5)	15.6 (12.8,18.7)	14.4 (11.8,17.2)	13.8 (11.5,16.6)	13.8 (11.8,16.2)	14.5 (12.6,16.8)	15.0 (13.2,17.1)	14.8 (13.2,16.7)	15.0 (13.3,16.8)	14.9 (13.2,16.9)	13.4 (11.5,15.6)	12.8 (10.7,15.2)	12.0 (9.5,14.8)	12.3 (9.7,15.1)	12.4 (10.1,15.1)	11.9 (9.8,14.4)	-1.9 (-3.7,0.1)
	Both	17.3 (14.3,20.7)	17.1 (14.3,20.3)	16.8 (14.1,19.8)	15.9 (13.3,18.7)	15.2 (12.9,18.1)	15.0 (12.8,17.5)	15.1 (13.1,17.4)	15.5 (13.6,17.6)	15.5 (13.8,17.5)	15.1 (13.4,17.0)	15.1 (13.4,17.0)	14.2 (12.4,16.2)	13.6 (11.6,15.7)	13.2 (11.2,15.4)	13.4 (11.3,15.9)	13.3 (11.0,16.0)	12.7 (10.5,15.2)	-1.9 (-3.5,-0.2)
St. Clair County, AL	Male	27.3 (23.5,31.3)	27.0 (23.4,30.9)	26.6 (23.0,30.5)	25.8 (22.3,29.7)	24.2 (20.5,27.9)	24.5 (21.0,28.4)	23.6 (20.7,27.0)	24.3 (21.4,27.6)	25.2 (22.5,28.3)	25.2 (22.1,28.7)	24.7 (21.9,27.8)	24.8 (22.0,28.0)	22.9 (20.2,26.0)	22.6 (19.5,26.1)	22.5 (18.1,27.1)	23.0 (19.7,26.9)	22.0 (18.8,25.9)	-1.3 (-2.6,0.1)
	Female	22.7 (18.2,27.9)	22.7 (18.5,27.5)	22.6 (18.8,27.0)	23.0 (19.4,27.3)	23.1 (19.4,27.0)	23.3 (19.9,27.0)	24.4 (21.1,28.0)	23.6 (20.7,26.9)	22.5 (19.9,25.4)	21.8 (19.4,24.4)	22.4 (20.1,25.0)	21.0 (18.3,24.0)	19.6 (16.8,22.8)	19.3 (15.6,23.4)	18.4 (14.9,22.6)	17.7 (14.6,21.5)	17.1 (14.1,20.7)	-1.8 (-3.4,0.1)
	Both	24.9 (20.8,29.5)	24.8 (20.9,29.1)	24.6 (21.0,28.7)	24.4 (20.8,28.5)	23.6 (19.9,27.4)	23.9 (20.4,27.6)	24.0 (20.9,27.5)	23.9 (21.1,27.1)	23.8 (21.2,26.8)	23.5 (20.9,26.4)	23.5 (21.0,26.3)	22.9 (20.4,25.7)	21.3 (18.6,24.2)	20.9 (18.2,24.1)	20.4 (17.5,23.8)	20.3 (17.1,24.1)	19.5 (16.4,23.3)	-1.5 (-2.9,0.1)
Sumter County, AL	Male	24.7 (21.2,28.8)	24.4 (20.9,28.6)	24.1 (20.7,28.3)	22.7 (19.4,26.7)	22.5 (19.1,26.7)	22.6 (19.1,26.9)	22.3 (19.3,25.8)	21.9 (19.0,25.5)	22.6 (19.8,26.0)	21.8 (18.6,25.6)	20.8 (17.9,24.2)	20.4 (17.4,23.9)	21.0 (18.1,24.5)	19.9 (16.6,23.8)	18.8 (14.4,23.8)	19.8 (16.3,24.1)	18.9 (15.6,23.1)	-1.7 (-3.3,-0.2)
	Female	14.5 (11.0,19.1)	14.4 (11.2,18.6)	14.2 (11.3,18.0)	15.3 (12.3,19.0)	15.2 (12.2,18.9)	15.3 (12.6,18.8)	15.3 (12.7,18.5)	14.9 (12.6,17.8)	14.9 (12.7,17.6)	14.3 (12.3,16.9)	13.8 (11.7,16.3)	13.7 (11.4,16.6)	12.3 (9.7,15.3)	11.5 (8.4,15.0)	11.4 (8.3,15.2)	12.9 (10.1,16.6)	12.4 (9.7,15.9)	-1.0 (-3.3,1.2)
	Both	19.5 (16.1,23.8)	19.3 (16.1,23.3)	19.1 (16.0,22.9)	18.9 (15.8,22.8)	18.8 (15.6,22.6)	18.9 (15.9,22.7)	18.7 (16.0,22.1)	18.3 (15.8,21.5)	18.7 (16.3,21.7)	18.0 (15.5,21.1)	17.2 (14.8,20.2)	17.0 (14.5,20.0)	16.6 (14.0,19.6)	15.6 (12.9,18.9)	15.1 (12.1,18.7)	16.3 (13.2,20.3)	15.6 (12.6,19.4)	-1.4 (-3.3,0.4)
Talladega County, AL	Male	27.4 (23.7,31.5)	27.2 (23.7,31.1)	26.8 (23.4,30.8)	26.3 (22.9,30.3)	26.4 (22.9,30.5)	25.8 (22.4,30.0)	24.7 (21.7,28.1)	25.3 (22.4,28.6)	25.2 (22.5,28.4)	24.3 (21.3,27.8)	23.1 (20.5,25.9)	24.0 (21.3,26.9)	23.8 (21.3,26.8)	23.5 (20.5,26.8)	23.2 (19.1,27.8)	23.2 (19.8,26.9)	22.2 (19.0,25.9)	-1.3 (-2.6,0.0)
	Female	22.4 (17.7,27.6)	22.2 (17.9,26.8)	21.9 (18.2,26.2)	20.7 (17.3,24.6)	21.0 (17.8,24.9)	20.9 (18.0,24.5)	21.2 (18.4,24.6)	22.0 (19.4,24.9)	21.6 (19.3,24.3)	20.7 (18.7,22.9)	21.4 (19.3,23.8)	19.7 (17.0,22.6)	18.9 (16.0,22.0)	18.4 (14.9,21.9)	18.4 (14.9,22.0)	18.5 (15.5,21.8)	17.8 (15.1,21.0)	-1.4 (-3.1,0.3)
	Both	24.9 (20.7,29.4)	24.6 (20.8,28.8)	24.3 (20.8,28.3)	23.5 (20.0,27.3)	23.6 (20.3,27.7)	23.3 (20.2,27.1)	22.9 (20.1,26.2)	23.6 (20.9,26.7)	23.4 (20.9,26.2)	22.5 (20.1,25.1)	22.2 (20.0,24.7)	21.8 (19.4,24.5)	21.3 (18.8,24.2)	20.9 (18.2,24.0)	20.8 (17.8,24.0)	20.8 (17.6,24.3)	20.0 (17.0,23.4)	-1.4 (-2.8,0.1)
Tallapoosa County, AL	Male	26.7 (23.0,30.4)	26.4 (22.8,30.1)	26.1 (22.5,29.7)	24.6 (21.2,28.1)	24.6 (20.9,28.5)	24.6 (21.0,28.2)	24.3 (21.2,27.5)	23.9 (21.0,27.3)	24.9 (22.0,28.1)	23.6 (20.4,26.9)	23.2 (20.3,26.1)	23.5 (20.6,26.4)	22.7 (19.9,25.5)	20.8 (17.7,23.9)	22.7 (18.3,26.8)	22.3 (18.9,26.1)	21.5 (18.1,25.2)	-1.4 (-2.7,-0.1)
	Female	18.7 (14.4,23.5)	18.6 (14.8,22.8)	18.5 (14.9,22.4)	18.5 (15.0,22.1)	19.3 (16.0,22.9)	20.9 (17.8,24.5)	21.7 (18.6,25.1)	22.8 (20.0,26.2)	23.9 (21.1,27.1)	22.3 (19.8,24.9)	21.0 (18.5,23.6)	20.6 (17.8,23.6)	20.1 (17.0,23.4)	18.5 (14.7,22.3)	19.0 (15.2,22.9)	18.9 (15.5,22.6)	18.2 (15.0,21.8)	-0.2 (-2.0,1.8)
	Both	22.6 (18.7,26.7)	22.5 (18.8,26.2)	22.2 (18.7,25.9)	21.5 (18.0,25.1)	21.9 (18.5,25.6)	22.7 (19.4,26.4)	22.9 (19.9,26.3)	23.4 (20.5,26.6)	24.4 (21.5,27.6)	22.9 (20.2,25.8)	22.1 (19.4,24.5)	22.1 (19.3,24.7)	21.4 (18.6,24.3)	19.6 (16.7,22.9)	20.8 (17.7,24.2)	20.6 (17.2,24.3)	19.8 (16.5,23.5)	-0.8 (-2.4,0.7)
Tuscaloosa County, AL	Male	21.5 (18.6,24.7)	21.3 (18.5,24.4)	20.9 (18.3,23.9)	21.4 (18.6,24.5)	21.4 (18.5,24.5)	21.4 (18.5,24.5)	21.7 (19.2,24.5)	21.7 (19.3,24.3)	21.5 (19.2,23.9)	19.7 (17.3,22.1)	18.0 (16.0,20.1)	18.1 (16.0,20.2)	18.4 (16.3,20.5)	18.4 (16.1,20.8)	18.4 (15.2,21.6)	19.2 (16.6,22.2)	18.4 (15.9,21.3)	-1.0 (-2.2,0.3)
	Female	17.8 (14.5,21.7)	17.6 (14.6,21.1)	17.4 (14.6,20.5)	17.2 (14.5,20.2)	16.3 (13.9,19.2)	17.0 (14.6,19.7)	17.8 (15.6,20.2)	18.1 (16.1,20.4)	17.8 (15.9,19.8)	17.9 (16.3,19.7)	16.6 (15.0,18.2)	15.4 (13.7,17.3)	15.7 (13.8,17.9)	15.5 (13.2,18.1)	14.8 (12.4,17.6)	14.5 (12.4,16.8)	13.9 (11.9,16.1)	-1.5 (-3.1,0.0)
	Both	19.6 (16.6,23.1)	19.4 (16.6,22.5)	19.2 (16.3,22.2)	19.3 (16.5,22.3)	18.8 (16.1,21.8)	19.2 (16.6,22.0)	19.7 (17.4,22.2)	19.9 (17.7,22.2)	19.6 (17.5,21.8)	18.8 (16.9,20.8)	17.3 (15.6,19.1)	16.7 (15.1,18.5)	17.0 (15.2,19.1)	16.9 (14.9,19.3)	16.6 (14.4,19.0)	16.8 (14.4,19.4)	16.1 (13.8,18.6)	-1.2 (-2.5,0.1)
Walker County, AL	Male	28.5 (24.9,32.7)	28.3 (24.8,32.4)	28.0 (24.5,31.9)	27.7 (24.2,31.6)	27.4 (23.9,31.6)	27.4 (23.8,31.5)	27.6 (24.5,31.2)	27.7 (24.6,31.4)	28.6 (25.6,31.9)	27.7 (24.5,31.3)	26.0 (23.3,29.0)	25.2 (22.5,28.4)	24.6 (21.9,27.6)	22.9 (19.6,26.4)	22.6 (18.3,27.5)	24.3 (20.8,28.2)	23.3 (19.8,27.2)	-1.3 (-2.5,0.0)
	Female	23.6 (19.2,28.9)	23.7 (19.7,28.6)	23.7 (20.0,28.3)	25.1 (21.3,29.5)	25.4 (21.8,29.6)	26.6 (23.2,30.5)	25.9 (22.8,29.4)	24.8 (22.0,27.9)	24.1 (21.7,26.9)	22.6 (20.4,25.2)	21.5 (19.3,24.0)	21.4 (18.7,24.5)	22.0 (18.9,25.4)	21.4 (17.5,25.6)	21.6 (17.7,25.9)	21.4 (18.0,25.2)	20.7 (17.5,24.3)	-0.8 (-2.4,0.9)
	Both	26.0 (22.1,30.9)	26.0 (22.3,30.4)	25.8 (22.3,29.9)	26.4 (22.7,30.5)	26.4 (22.9,30.5)	27.0 (23.7,31.0)	26.7 (23.6,30.3)	26.3 (23.3,29.6)	26.3 (23.6,29.3)	25.1 (22.7,28.0)	23.7 (21.4,26.4)	23.3 (20.8,26.1)	23.3 (20.6,26.5)	22.1 (19.2,25.6)	22.1 (19.0,25.7)	22.8 (19.4,26.7)	22.0 (18.6,25.7)	-1.1 (-2.4,0.4)
Washington County, AL	Male	25.8 (22.1,29.8)	25.6 (21.9,29.5)	25.3 (21.5,29.3)	24.3 (20.7,28.2)	23.9 (20.2,28.1)	24.2 (20.4,28.5)	23.6 (20.4,27.1)	23.6 (20.5,27.1)	24.2 (21.3,27.4)	23.3 (20.1,27.0)	21.8 (18.9,25.0)	21.7 (18.7,25.1)	21.6 (18.8,24.9)	21.1 (17.7,24.9)	21.1 (16.4,26.2)	22.0 (18.3,26.2)	21.1 (17.5,25.3)	-1.2 (-2.7,0.1)
	Female	19.4 (14.8,24.6)	19.4 (15.1,24.1)	19.3 (15.5,23.8)	19.6 (15.8,23.9)	18.7 (15.1,22.9)	19.1 (15.7,23.0)	19.0 (15.9,22.8)	18.6 (15.8,21.9)	19.1 (16.4,22.0)	20.3 (17.6,23.1)	19.3 (16.7,22.2)	19.1 (16.2,22.3)	19.2 (15.9,22.7)	17.5 (13.7,21.5)	16.5 (12.7,20.7)	17.0 (13.6,21.2)	16.4 (13.0,20.3)	-1.0 (-3.1,1.0)
	Both	22.5 (18.4,27.0)	22.4 (18.6,26.7)	22.2 (18.5,26.5)	21.9 (18.2,26.1)	21.2 (17.6,25.5)	21.6 (18.1,25.7)	21.3 (18.1,24.9)	21.1 (18.2,24.4)	21.6 (18.8,24.6)	21.8 (19.0,24.9)	20.6 (17.9,23.5)	20.4 (17.7,23.4)	20.4 (17.4,23.6)	19.3 (16.2,22.7)	18.7 (15.4,22.6)	19.5 (15.9,23.6)	18.7 (15.2,22.7)	-1.1 (-2.8,0.5)
Wilcox County, AL	Male	25.3 (21.5,29.4)	25.2 (21.5,29.4)	25.0 (21.3,29.2)	24.0 (20.4,28.2)	24.4 (20.7,28.6)	24.0 (20.3,28.2)	23.1 (20.0,26.6)	22.0 (19.2,25.3)	22.2 (19.5,25.3)	20.3 (17.3,23.6)	19.6 (16.7,22.6)	18.6 (15.7,21.7)	21.4 (18.4,24.9)	20.3 (17.0,24.1)	20.8 (16.1,25.7)	21.4 (17.6,25.6)	20.5 (16.8,24.6)	-1.3 (-2.8,0.3)
	Female	15.0 (11.1,19.6)	15.0 (11.4,19.0)	14.9 (11.6,18.6)	15.9 (12.7,19.8)	16.5 (13.3,20.4)	16.6 (13.7,20.1)	16.0 (13.4,19.1)	15.9 (13.5,18.8)	16.4 (14.1,19.1)	15.1 (13.0,17.7)	14.7 (12.5,17.2)	14.8 (12.1,18.1)	14.6 (11.6,18.2)	14.2 (10.6,18.6)	14.3 (10.8,18.7)	14.4 (11.1,18.3)	14.0 (10.9,17.7)	-0.4 (-2.7,2.2)
	Both	20.1 (16.2,24.2)	20.0 (16.4,23.9)	19.9 (16.4,23.7)	19.9 (16.4,23.9)	20.4 (17.0,24.3)	20.2 (17.0,24.0)	19.5 (16.7,22.7)	18.9 (16.3,21.9)	19.3 (16.7,22.1)	17.7 (15.2,20.4)	17.1 (14.7,19.8)	16.6 (14.2,19.6)	17.9 (15.2,21.5)	17.2 (14.2,20.9)	17.5 (14.3,21.3)	17.8 (14.3,21.8)	17.2 (13.8,21.1)	-1.0 (-2.7,1.0)
Winston County, AL	Male	29.8 (25.7,33.9)	29.5 (25.4,33.6)	29.1 (25.2,33.3)	28.3 (24.4,32.5)	27.1 (23.2,31.4)	27.0 (23.1,31.2)	27.1 (23.7,30.7)	27.2 (23.9,30.7)	28.2 (25.0,31.4)	28.6 (25.0,32.3)	27.3 (24.3,30.4)	26.8 (23.7,30.0)	26.2 (22.9,29.6)	25.1 (21.3,28.6)	23.1 (18.0,27.9)	24.4 (20.3,28.5)	23.5 (19.6,27.5)	-1.5 (-2.9,-0.1)
	Female	24.0 (18.8,29.4)	24.0 (19.1,28.9)	23.9 (19.4,28.6)	24.9 (20.4,29.7)	24.8 (20.5,29.5)	24.7 (20.7,28.9)	24.6 (21.0,28.5)	23.7 (20.4,27.2)	22.7 (19.9,25.7)	21.7 (19.1,24.5)	21.4 (18.7,24.2)	21.2 (17.9,24.8)	21.9 (18.2,25.9)	21.7 (17.4,26.5)	20.9 (16.4,25.6)	20.5 (16.3,24.9)	19.8 (15.8,24.0)	-1.2 (-3.0,0.7)
	Both	26.8 (22.1,31.3)	26.7 (22.3,31.1)	26.5 (22.3,30.9)	26.6 (22.4,31.2)	25.9 (21.8,30.4)	25.8 (21.9,30.1)	25.8 (22.4,29.7)	25.4 (22.1,28.8)	25.4 (22.4,28.4)	25.1 (22.2,28.0)	24.3 (21.5,27.2)	23.9 (20.9,27.1)	24.0 (20.7,27.4)	23.3 (19.8,27.0)	22.0 (18.1,25.9)	22.4 (18.3,26.7)	21.6 (17.6,25.7)	-1.4 (-2.9,0.2)
Arkansas County, AR	Male	27.8 (24.0,31.8)	27.2 (23.5,31.2)	26.8 (23.2,30.8)	26.1 (22.5,30.1)	25.8 (22.3,29.9)	26.6 (22.9,30.9)	26.2 (23.0,29.8)	26.3 (23.0,29.7)	25.8 (22.8,29.0)	24.9 (21.5,28.4)	23.2 (20.2,26.2)	22.8 (19.7,25.9)	22.2 (19.2,25.3)	21.7 (18.3,25.4)	21.7 (16.9,26.8)	22.7 (18.8,26.6)	21.8 (18.1,25.6)	-1.5 (-3.0,-0.3)
	Female	22.8 (18.1,28.0)	22.7 (18.5,27.2)	22.7 (18.7,26.9)	24.3 (20.3,28.7)	23.9 (20.1,28.4)	24.2 (20.8,28.1)	23.5 (20.4,27.1)	22.2 (19.4,25.3)	20.1 (17.8,22.6)	19.6 (17.3,22.0)	19.3 (16.8,22.0)	18.5 (15.3,21.6)	18.8 (15.1,22.4)	20.0 (15.5,24.5)	20.4 (15.9,24.9)	20.6 (16.5,24.8)	19.9 (16.0,23.9)	-0.9 (-2.7,0.9)
	Both	25.3 (21.1,29.6)	24.9 (21.0,29.0)	24.7 (20.9,28.7)	25.2 (21.4,29.4)	24.8 (21.2,29.2)	25.4 (22.0,29.4)	24.8 (21.7,28.4)	24.2 (21.2,27.4)	22.9 (20.2,25.8)	22.2 (19.5,25.0)	21.2 (18.6,24.0)	20.6 (17.8,23.5)	20.5 (17.3,23.7)	20.8 (17.3,24.3)	21.1 (17.5,24.9)	21.6 (17.6,25.6)	20.8 (17.0,24.7)	-1.2 (-2.8,0.2)
Ashley County, AR	Male	28.2 (24.4,32.2)	27.6 (23.9,31.4)	27.2 (23.5,31.1)	27.2 (23.5,31.1)	26.8 (22.8,30.7)	26.8 (22.9,30.9)	25.9 (22.4,29.3)	26.1 (22.6,29.3)	25.3 (22.2,28.2)	24.7 (21.0,28.0)	24.0 (20.8,26.8)	23.3 (19.9,26.3)	23.0 (19.6,26.0)	22.8 (18.8,26.1)	22.1 (17.1,26.7)	22.7 (18.7,26.6)	21.8 (17.8,25.8)	-1.6 (-3.1,-0.3)
	Female	21.8 (17.3,27.0)	21.6 (17.5,26.1)	21.5 (17.6,25.7)	21.4 (17.7,25.4)	21.3 (17.6,25.3)	21.2 (17.8,24.8)	20.8 (17.6,24.0)	21.3 (18.4,24.2)	21.8 (19.0,24.3)	21.5 (18.8,24.1)	21.5 (18.6,24.0)	21.1 (17.8,24.2)	20.5 (17.0,24.0)	20.3 (16.0,24.5)	18.9 (14.7,23.0)	18.7 (14.8,22.8)	18.0 (14.2,21.9)	-1.2 (-3.2,0.7)
	Both	24.9 (20.9,29.4)	24.5 (20.7,28.7)	24.3 (20.6,28.2)	24.3 (20.6,28.2)	24.0 (20.2,27.9)	24.0 (20.3,27.7)	23.3 (20.0,26.6)	23.7 (20.5,26.7)	23.5 (20.6,26.2)	23.1 (20.2,25.7)	22.7 (19.7,25.4)	22.2 (19.1,25.0)	21.8 (18.5,25.0)	21.5 (17.9,24.9)	20.5 (16.7,24.1)	20.6 (16.7,24.7)	19.9 (16.0,23.8)	-1.4 (-3.1,0.0)
Baxter County, AR	Male	29.3 (25.5,33.2)	28.8 (25.0,32.5)	28.5 (24.5,32.2)	28.8 (24.9,32.6)	28.1 (24.2,32.0)	27.7 (23.8,31.5)	27.0 (23.6,30.4)	26.4 (23.1,29.4)	25.1 (22.2,28.0)	25.3 (22.0,28.4)	25.6 (22.6,28.6)	24.6 (21.5,27.7)	25.4 (22.3,28.8)	23.8 (20.4,27.5)	23.8 (19.3,28.5)	22.0 (18.3,26.1)	21.1 (17.5,25.2)	-2.1 (-3.5,-0.6)
	Female	28.3 (22.7,33.9)	28.0 (22.9,33.1)	27.8 (23.3,32.5)	27.7 (23.3,32.2)	25.9 (21.6,30.0)	24.7 (21.0,28.4)	22.9 (19.5,26.2)	22.2 (19.3,25.1)	21.7 (19.1,24.3)	22.4 (19.8,25.1)	23.0 (20.3,26.0)	22.7 (19.2,26.5)	22.2 (18.4,26.5)	22.0 (17.4,27.2)	20.9 (16.3,26.3)	22.0 (17.9,26.7)	21.3 (17.3,25.7)	-1.8 (-3.5,0.1)
	Both	28.8 (24.0,33.5)	28.4 (24.1,32.7)	28.1 (24.0,32.4)	28.2 (24.1,32.4)	27.0 (22.9,31.0)	26.2 (22.5,29.9)	24.9 (21.5,28.3)	24.3 (21.2,27.2)	23.4 (20.7,26.1)	23.8 (21.0,26.5)	24.3 (21.6,27.3)	23.6 (20.7,26.8)	23.8 (20.5,27.3)	22.9 (19.4,26.7)	22.3 (18.8,26.4)	22.0 (18.1,26.4)	21.2 (17.4,25.4)	-1.9 (-3.5,-0.3)
Benton County, AR	Male	27.6 (24.0,30.8)	26.8 (23.6,29.9)	26.3 (23.1,29.5)	26.1 (22.8,29.1)	24.4 (21.2,27.6)	23.7 (20.8,26.7)	21.8 (19.3,24.4)	22.0 (19.6,24.5)	20.7 (18.7,22.9)	20.6 (18.4,23.0)	21.3 (19.4,23.3)	20.7 (18.8,22.8)	20.4 (18.6,22.6)	19.6 (17.5,22.1)	18.9 (15.8,22.2)	16.8 (14.4,19.7)	16.1 (13.8,18.9)	-3.4 (-4.5,-2.0)
	Female	21.5 (17.8,25.3)	21.2 (17.8,24.5)	21.0 (17.8,23.9)	20.6 (17.7,23.5)	19.4 (16.8,22.1)	20.1 (17.7,22.6)	18.5 (16.5,20.8)	19.1 (17.3,21.1)	19.6 (18.0,21.4)	19.2 (17.7,21.0)	17.7 (16.2,19.6)	18.0 (16.1,20.5)	16.1 (13.9,18.8)	15.0 (12.4,18.2)	14.6 (11.9,18.0)	15.9 (13.5,18.7)	15.2 (13.0,18.1)	-2.2 (-3.5,-0.5)
	Both	24.5 (20.9,27.9)	24.0 (20.6,27.2)	23.6 (20.5,26.5)	23.3 (20.2,26.2)	21.9 (19.0,24.8)	21.9 (19.2,24.6)	20.1 (17.9,22.5)	20.5 (18.4,22.8)	20.1 (18.3,22.1)	19.9 (18.2,21.8)	19.5 (17.9,21.3)	19.3 (17.6,21.3)	18.2 (16.4,20.5)	17.3 (15.3,19.8)	16.7 (14.6,19.4)	16.3 (14.0,19.2)	15.6 (13.4,18.5)	-2.8 (-4.1,-1.4)
Boone County, AR	Male	26.8 (23.3,30.7)	26.2 (22.7,29.9)	25.8 (22.3,29.6)	25.0 (21.6,28.8)	24.9 (21.5,28.7)	25.5 (22.0,29.4)	25.5 (22.5,28.7)	26.2 (23.3,29.4)	25.6 (22.9,28.4)	25.1 (22.2,28.3)	24.8 (22.1,27.9)	23.5 (20.7,26.5)	22.9 (20.1,26.1)	23.1 (19.8,26.8)	22.7 (18.3,27.1)	23.5 (19.9,27.7)	22.6 (19.0,26.6)	-1.1 (-2.4,0.3)
	Female	24.1 (19.2,29.4)	24.0 (19.5,28.7)	24.0 (19.9,28.3)	24.7 (20.8,29.1)	24.3 (20.6,28.5)	24.3 (21.1,28.1)	25.5 (22.5,29.2)	24.1 (21.5,27.2)	23.5 (21.2,26.1)	23.2 (20.9,26.0)	22.9 (20.5,25.8)	21.8 (18.8,25.5)	22.8 (19.3,26.8)	21.6 (17.2,26.4)	19.7 (15.4,24.4)	19.9 (16.3,24.3)	19.2 (15.7,23.5)	-1.4 (-3.2,0.5)
	Both	25.4 (21.2,29.9)	25.0 (21.2,29.2)	24.9 (21.2,28.8)	24.9 (21.2,28.9)	24.6 (21.0,28.6)	24.9 (21.6,28.6)	25.5 (22.5,28.9)	25.1 (22.5,28.3)	24.5 (22.1,27.2)	24.2 (21.7,26.9)	23.8 (21.3,26.8)	22.6 (20.1,25.7)	22.8 (20.0,26.3)	22.3 (19.1,26.1)	21.2 (17.9,25.1)	21.7 (18.1,26.0)	20.9 (17.4,24.9)	-1.2 (-2.8,0.4)
Bradley County, AR	Male	27.0 (23.5,31.1)	26.2 (22.8,30.5)	25.7 (22.3,30.0)	25.2 (21.8,29.3)	24.9 (21.3,29.1)	25.7 (22.1,30.3)	25.5 (22.4,29.3)	26.4 (23.3,30.1)	26.6 (23.6,30.1)	26.7 (23.4,30.8)	26.5 (23.4,30.0)	27.1 (23.7,30.9)	24.5 (21.2,28.1)	22.8 (19.5,26.8)	22.8 (18.1,27.8)	23.0 (19.3,27.3)	22.2 (18.4,26.5)	-1.2 (-2.7,0.2)
	Female	21.9 (17.2,27.3)	21.6 (17.5,26.5)	21.3 (17.7,26.0)	21.1 (17.6,25.6)	20.7 (17.3,25.2)	21.1 (17.9,25.0)	20.4 (17.5,24.0)	20.8 (18.0,24.2)	21.1 (18.5,24.1)	21.3 (18.8,24.3)	20.8 (18.2,23.9)	21.2 (17.9,25.0)	18.7 (15.0,22.8)	18.8 (14.3,23.8)	18.5 (13.9,23.6)	18.7 (14.8,23.4)	18.0 (14.4,22.6)	-1.2 (-3.3,0.8)
	Both	24.4 (20.4,29.1)	23.9 (20.2,28.3)	23.5 (20.0,27.9)	23.1 (19.7,27.5)	22.8 (19.3,27.2)	23.4 (20.0,27.6)	22.9 (19.9,26.6)	23.6 (20.7,27.1)	23.8 (21.0,27.0)	24.0 (21.2,27.3)	23.6 (20.8,26.8)	24.1 (21.0,27.6)	21.6 (18.3,25.2)	20.8 (17.2,24.7)	20.6 (17.0,24.7)	20.8 (17.0,25.3)	20.1 (16.4,24.5)	-1.2 (-3.0,0.5)
Calhoun County, AR	Male	27.7 (24.1,32.1)	27.2 (23.5,31.4)	26.9 (23.2,31.0)	26.7 (23.0,30.9)	26.2 (22.5,30.4)	26.1 (22.4,30.4)	25.7 (22.5,29.4)	26.6 (23.3,30.2)	26.0 (23.0,29.4)	25.8 (22.4,29.6)	25.2 (22.1,28.8)	25.5 (22.2,29.1)	26.5 (23.1,30.4)	26.6 (22.7,31.0)	25.4 (20.5,31.2)	25.4 (21.3,30.3)	24.3 (20.3,29.2)	-0.8 (-2.3,0.6)
	Female	22.6 (17.7,28.3)	22.4 (18.0,27.5)	22.2 (18.1,27.0)	22.5 (18.5,27.4)	22.9 (19.0,27.4)	22.5 (19.0,26.7)	21.4 (18.2,25.0)	22.1 (19.1,25.6)	21.7 (19.1,24.9)	21.3 (18.5,24.4)	21.0 (18.0,24.5)	21.2 (17.5,25.5)	21.5 (17.2,26.4)	20.9 (15.7,26.7)	20.8 (15.7,26.8)	22.2 (17.7,27.8)	21.4 (17.2,26.7)	-0.3 (-2.5,1.7)
	Both	25.1 (21.0,29.9)	24.7 (20.9,29.2)	24.5 (20.6,29.1)	24.6 (20.7,29.1)	24.5 (20.7,28.8)	24.3 (20.7,28.5)	23.5 (20.4,27.1)	24.3 (21.2,27.8)	23.8 (21.0,27.0)	23.5 (20.6,26.8)	23.1 (20.1,26.5)	23.3 (19.9,27.0)	23.9 (20.3,28.3)	23.7 (19.8,28.4)	23.1 (19.1,27.9)	23.7 (19.5,29.0)	22.8 (18.7,27.9)	-0.6 (-2.4,1.0)
Carroll County, AR	Male	27.4 (23.7,31.2)	26.6 (23.0,30.2)	26.1 (22.5,29.9)	25.6 (22.0,29.3)	24.4 (20.9,28.3)	24.1 (20.6,27.8)	23.1 (20.2,26.3)	23.8 (20.8,27.0)	23.5 (20.6,26.4)	24.2 (21.1,27.5)	25.1 (22.3,28.3)	24.6 (21.7,27.7)	23.2 (20.4,26.4)	22.8 (19.6,26.3)	22.3 (18.1,26.8)	21.1 (17.8,25.2)	20.2 (16.9,24.2)	-1.9 (-3.3,-0.5)
	Female	24.8 (19.7,30.1)	24.5 (20.0,29.3)	24.2 (20.1,28.6)	24.0 (19.9,28.1)	23.9 (19.9,28.2)	24.3 (20.7,28.3)	25.7 (22.1,29.7)	24.7 (21.5,28.4)	24.5 (21.6,27.6)	24.5 (21.8,27.7)	23.0 (20.4,26.1)	21.5 (18.5,25.1)	20.7 (17.3,24.6)	19.5 (15.5,24.2)	17.6 (13.7,22.1)	18.0 (14.5,22.3)	17.2 (14.0,21.3)	-2.3 (-4.1,-0.2)
	Both	26.1 (21.9,30.5)	25.5 (21.6,29.5)	25.2 (21.3,29.1)	24.8 (20.9,28.7)	24.1 (20.4,28.2)	24.2 (20.6,27.8)	24.4 (21.2,28.0)	24.3 (21.2,27.7)	24.0 (21.1,27.1)	24.3 (21.5,27.4)	24.0 (21.4,27.1)	23.0 (20.3,26.3)	21.9 (19.0,25.5)	21.1 (17.9,24.9)	19.9 (16.8,23.7)	19.5 (16.1,23.8)	18.7 (15.4,22.7)	-2.1 (-3.6,-0.3)
Chicot County, AR	Male	27.9 (24.2,32.2)	27.4 (23.8,31.4)	27.2 (23.7,31.3)	26.7 (23.2,30.7)	26.3 (22.7,30.6)	27.5 (23.8,31.8)	26.8 (23.6,30.5)	26.5 (23.4,30.2)	26.8 (23.8,30.2)	26.2 (22.8,30.0)	25.3 (22.2,28.6)	24.7 (21.5,28.0)	24.8 (21.4,28.1)	23.4 (19.7,27.2)	22.5 (17.9,27.4)	23.3 (19.4,27.4)	22.3 (18.4,26.4)	-1.4 (-2.8,0.0)
	Female	19.1 (15.0,24.1)	18.9 (15.3,23.5)	18.8 (15.4,22.9)	19.4 (16.0,23.3)	20.7 (17.2,24.7)	20.1 (16.9,24.0)	19.6 (16.8,23.3)	20.0 (17.1,23.4)	19.8 (17.2,22.7)	19.3 (16.7,22.1)	19.3 (16.6,22.1)	18.6 (15.6,21.8)	17.7 (14.4,21.2)	16.6 (12.6,21.0)	14.9 (11.2,19.2)	15.4 (12.1,19.2)	14.7 (11.5,18.4)	-1.6 (-3.9,0.5)
	Both	23.4 (19.6,27.8)	23.1 (19.5,27.3)	23.0 (19.5,26.9)	23.0 (19.5,26.9)	23.4 (20.0,27.5)	23.7 (20.4,27.8)	23.1 (20.1,26.8)	23.2 (20.3,26.7)	23.3 (20.4,26.3)	22.7 (19.8,25.7)	22.2 (19.3,25.2)	21.6 (18.6,24.7)	21.1 (18.0,24.4)	19.9 (16.7,23.4)	18.7 (15.3,22.3)	19.3 (15.6,23.2)	18.5 (14.9,22.3)	-1.5 (-3.2,0.2)
Clark County, AR	Male	22.9 (19.7,26.4)	22.3 (19.3,25.8)	22.0 (18.9,25.4)	21.7 (18.6,25.1)	21.0 (17.9,24.5)	20.6 (17.5,24.0)	20.8 (18.2,23.9)	21.3 (18.7,24.3)	20.9 (18.3,23.6)	20.9 (18.0,24.1)	20.8 (18.2,23.7)	20.5 (17.6,23.5)	20.7 (17.9,23.8)	20.1 (16.9,23.6)	19.6 (15.3,24.0)	19.7 (16.3,23.4)	18.9 (15.7,22.7)	-1.2 (-2.7,0.3)
	Female	18.0 (13.9,22.3)	17.9 (14.2,21.8)	17.8 (14.5,21.6)	18.3 (15.1,22.0)	18.4 (15.3,22.0)	18.2 (15.6,21.4)	17.1 (14.7,20.0)	17.0 (14.7,19.6)	16.3 (14.2,18.7)	15.8 (13.7,18.1)	16.1 (13.8,18.6)	15.8 (13.0,19.1)	15.1 (12.0,18.8)	15.0 (11.3,19.4)	15.6 (11.7,19.9)	16.2 (12.8,20.3)	15.6 (12.5,19.6)	-0.9 (-3.0,1.3)
	Both	20.4 (16.8,24.2)	20.1 (16.8,23.8)	19.8 (16.7,23.3)	20.0 (16.8,23.5)	19.7 (16.6,23.2)	19.4 (16.5,22.7)	18.9 (16.4,21.9)	19.1 (16.7,21.9)	18.6 (16.2,21.1)	18.3 (15.9,20.9)	18.4 (16.0,21.0)	18.1 (15.6,21.0)	17.9 (15.0,21.3)	17.5 (14.5,21.2)	17.6 (14.4,21.2)	17.9 (14.5,21.9)	17.2 (14.0,21.2)	-1.0 (-2.8,0.7)
Clay County, AR	Male	31.9 (27.6,36.5)	31.3 (27.0,35.7)	30.9 (26.8,35.5)	30.7 (26.5,35.2)	30.1 (25.8,34.7)	31.4 (27.0,36.2)	32.1 (28.3,36.2)	31.8 (28.0,35.7)	31.3 (28.0,34.8)	30.6 (26.9,34.5)	30.0 (26.8,33.5)	28.7 (25.5,32.3)	29.6 (26.4,33.5)	28.0 (24.1,32.1)	27.1 (21.9,32.4)	27.1 (23.1,31.6)	26.2 (22.1,30.5)	-1.2 (-2.5,0.2)
	Female	28.8 (23.0,34.9)	28.4 (23.4,34.2)	28.2 (23.5,33.8)	28.9 (24.1,34.2)	26.9 (22.4,31.9)	26.4 (22.5,30.8)	26.8 (23.1,30.8)	25.9 (22.7,29.3)	24.7 (22.0,27.6)	24.2 (21.6,27.1)	25.8 (23.0,29.1)	25.2 (21.7,29.4)	25.2 (21.4,30.0)	24.4 (19.5,30.1)	24.6 (19.8,30.2)	23.7 (19.5,28.6)	22.9 (18.9,27.6)	-1.4 (-3.1,0.5)
	Both	30.3 (25.6,35.5)	29.8 (25.2,34.9)	29.6 (25.1,34.5)	29.8 (25.2,34.7)	28.4 (24.1,33.2)	28.9 (24.9,33.4)	29.4 (25.7,33.5)	28.8 (25.3,32.4)	28.0 (24.9,31.1)	27.4 (24.4,30.4)	27.9 (25.0,31.1)	26.9 (23.9,30.6)	27.4 (24.0,31.4)	26.2 (22.5,30.5)	25.9 (22.1,30.2)	25.4 (21.3,30.1)	24.5 (20.5,29.0)	-1.3 (-2.8,0.3)
Cleburne County, AR	Male	26.6 (23.2,30.2)	26.0 (22.7,29.4)	25.5 (22.3,29.1)	25.0 (21.9,28.4)	25.0 (21.7,28.8)	25.1 (21.8,28.9)	24.8 (21.9,28.0)	24.4 (21.7,27.5)	23.3 (20.9,26.2)	23.3 (20.5,26.5)	23.1 (20.5,26.2)	22.7 (20.1,25.8)	23.4 (20.5,26.7)	23.1 (19.9,26.4)	22.5 (18.4,26.9)	22.5 (18.8,26.4)	21.6 (17.9,25.4)	-1.3 (-2.8,0.1)
	Female	22.9 (18.5,28.0)	22.6 (18.6,27.2)	22.3 (18.6,26.4)	21.4 (17.9,25.2)	22.5 (19.0,26.4)	21.9 (18.8,25.4)	22.4 (19.5,25.7)	22.1 (19.4,25.3)	21.7 (19.3,24.6)	21.5 (19.0,24.3)	20.8 (18.2,23.9)	21.0 (17.7,24.8)	21.3 (17.5,25.4)	20.3 (15.8,25.4)	19.3 (14.8,24.3)	19.1 (15.2,23.5)	18.4 (14.6,22.6)	-1.4 (-3.4,0.6)
	Both	24.7 (21.0,29.1)	24.3 (20.7,28.2)	23.9 (20.4,27.5)	23.2 (19.9,26.8)	23.7 (20.4,27.6)	23.5 (20.4,27.2)	23.6 (20.7,26.8)	23.2 (20.6,26.3)	22.5 (20.1,25.4)	22.4 (19.9,25.2)	22.0 (19.4,24.9)	21.8 (19.0,25.1)	22.3 (19.3,25.8)	21.7 (18.3,25.4)	20.9 (17.5,24.7)	20.8 (16.9,24.9)	20.0 (16.2,24.0)	-1.3 (-3.1,0.3)
Cleveland County, AR	Male	27.2 (23.1,31.2)	26.6 (22.7,30.5)	26.2 (22.5,30.1)	25.4 (21.6,29.3)	25.0 (21.2,28.9)	25.2 (21.1,29.1)	24.4 (21.0,27.6)	23.8 (20.7,27.0)	23.0 (20.3,26.0)	22.3 (19.4,25.5)	21.4 (18.7,24.5)	21.1 (18.3,24.3)	21.5 (18.6,24.9)	21.2 (18.0,25.0)	21.5 (17.1,26.2)	21.7 (18.2,25.8)	20.8 (17.5,24.9)	-1.7 (-3.0,-0.2)
	Female	22.4 (17.6,28.3)	22.3 (17.8,27.6)	22.2 (17.9,26.9)	22.3 (18.1,26.7)	22.9 (18.8,27.2)	23.3 (19.5,27.2)	22.6 (19.2,26.3)	22.8 (19.5,26.1)	21.9 (19.2,24.9)	21.5 (18.8,24.4)	20.9 (18.3,23.9)	20.8 (17.5,24.6)	19.9 (16.4,24.1)	19.9 (15.6,25.0)	19.6 (15.5,24.6)	19.5 (15.7,24.3)	18.8 (15.2,23.4)	-1.1 (-3.1,1.2)
	Both	24.8 (20.5,29.7)	24.4 (20.3,28.9)	24.2 (20.1,28.3)	23.8 (19.7,28.0)	23.9 (20.1,27.9)	24.2 (20.4,28.1)	23.5 (20.2,26.9)	23.3 (20.2,26.5)	22.4 (19.7,25.4)	21.9 (19.2,24.8)	21.2 (18.6,24.1)	21.0 (18.2,24.1)	20.7 (17.7,24.2)	20.5 (17.4,24.4)	20.5 (17.1,24.6)	20.6 (16.9,25.0)	19.8 (16.3,24.1)	-1.4 (-3.0,0.4)
Columbia County, AR	Male	24.3 (21.0,28.0)	23.8 (20.5,27.4)	23.4 (20.2,26.8)	23.4 (20.3,26.8)	22.7 (19.4,26.1)	22.6 (19.4,26.1)	21.9 (19.1,25.1)	22.5 (19.7,25.7)	22.5 (20.0,25.5)	21.5 (18.7,24.7)	20.7 (18.2,23.8)	20.3 (17.7,23.5)	19.8 (17.0,22.9)	18.5 (15.3,22.1)	19.8 (15.8,24.4)	20.0 (16.4,24.1)	19.2 (15.7,23.2)	-1.5 (-3.0,0.0)
	Female	19.5 (15.5,24.3)	19.1 (15.5,23.3)	18.8 (15.5,22.6)	18.2 (15.0,22.0)	18.5 (15.3,21.9)	18.4 (15.6,21.8)	17.5 (14.9,20.6)	17.8 (15.5,20.7)	17.2 (15.2,19.9)	17.0 (15.0,19.6)	16.7 (14.4,19.3)	16.3 (13.5,19.6)	15.6 (12.4,19.3)	16.1 (12.1,20.5)	16.1 (12.0,20.5)	17.3 (13.5,21.6)	16.7 (13.1,20.9)	-1.0 (-3.0,1.0)
	Both	21.9 (18.3,26.0)	21.4 (18.1,25.1)	21.1 (17.9,24.7)	20.8 (17.6,24.4)	20.5 (17.3,24.0)	20.4 (17.5,23.9)	19.6 (17.0,22.7)	20.1 (17.5,23.1)	19.8 (17.6,22.6)	19.2 (17.0,22.1)	18.6 (16.3,21.4)	18.3 (15.7,21.2)	17.7 (14.8,20.9)	17.3 (14.1,20.8)	17.9 (14.5,21.9)	18.6 (14.9,22.8)	17.9 (14.4,22.0)	-1.2 (-3.0,0.4)
Conway County, AR	Male	26.9 (23.2,31.0)	26.3 (22.6,30.2)	25.8 (22.1,30.0)	25.3 (21.6,29.3)	24.9 (21.2,29.3)	25.8 (22.0,30.1)	25.8 (22.4,29.5)	25.9 (22.7,29.3)	24.8 (21.9,28.0)	24.0 (20.7,27.5)	23.4 (20.5,26.5)	22.8 (19.9,26.0)	23.3 (20.5,26.6)	23.6 (20.1,27.3)	22.8 (18.3,27.8)	23.0 (19.3,27.2)	22.1 (18.5,26.3)	-1.2 (-2.6,0.3)
	Female	21.8 (17.1,27.1)	21.6 (17.4,26.4)	21.5 (17.5,26.0)	22.1 (18.2,26.4)	22.3 (18.4,26.8)	22.4 (18.9,26.4)	22.1 (18.8,25.8)	23.6 (20.4,27.0)	23.4 (20.7,26.4)	23.2 (20.7,26.0)	23.1 (20.7,26.0)	23.0 (19.7,26.6)	22.2 (18.6,26.3)	21.6 (17.3,26.5)	19.8 (15.6,24.7)	19.4 (15.6,23.8)	18.7 (15.1,23.1)	-1.0 (-2.8,1.0)
	Both	24.3 (20.2,28.8)	23.9 (20.0,28.3)	23.6 (19.8,27.8)	23.6 (19.9,27.8)	23.6 (19.8,28.0)	24.1 (20.4,28.2)	23.9 (20.6,27.6)	24.7 (21.6,28.1)	24.1 (21.3,27.2)	23.6 (20.8,26.5)	23.3 (20.7,26.1)	22.9 (20.2,26.0)	22.7 (19.8,26.1)	22.5 (19.3,26.3)	21.2 (17.9,25.2)	21.1 (17.4,25.5)	20.4 (16.8,24.6)	-1.1 (-2.7,0.6)
Craighead County, AR	Male	27.7 (24.6,31.4)	27.0 (24.0,30.6)	26.6 (23.6,30.3)	25.4 (22.5,29.1)	25.1 (22.1,28.7)	24.8 (21.8,28.5)	24.7 (22.1,27.9)	24.7 (22.0,27.8)	24.5 (22.0,27.5)	24.1 (21.3,27.4)	23.5 (20.9,26.4)	22.0 (19.4,25.0)	20.9 (18.3,23.7)	19.7 (16.8,23.1)	19.5 (15.5,23.9)	21.1 (17.8,24.8)	20.2 (17.1,23.8)	-2.0 (-3.3,-0.8)
	Female	21.7 (17.8,26.0)	21.7 (18.3,25.5)	21.7 (18.7,25.3)	22.9 (19.9,26.4)	22.3 (19.5,25.8)	23.3 (20.6,26.5)	21.2 (18.8,23.9)	20.5 (18.4,22.8)	19.8 (18.0,22.0)	20.5 (18.6,22.7)	19.3 (17.2,21.5)	19.5 (16.8,22.3)	19.4 (16.3,22.5)	19.6 (15.7,23.4)	18.0 (14.2,21.7)	17.9 (14.6,21.8)	17.3 (14.2,20.9)	-1.4 (-3.1,0.2)
	Both	24.6 (21.2,28.4)	24.3 (21.2,27.9)	24.1 (21.2,27.7)	24.1 (21.2,27.8)	23.7 (20.8,27.2)	24.0 (21.3,27.3)	22.9 (20.4,25.8)	22.6 (20.2,25.3)	22.2 (20.0,24.6)	22.3 (20.1,24.8)	21.3 (19.1,23.8)	20.7 (18.3,23.3)	20.1 (17.5,22.9)	19.6 (16.8,22.7)	18.7 (15.7,22.2)	19.5 (16.2,23.2)	18.7 (15.6,22.4)	-1.7 (-3.2,-0.3)
Crawford County, AR	Male	29.9 (26.1,34.0)	29.2 (25.5,33.2)	28.8 (25.2,32.8)	26.9 (23.3,30.7)	26.6 (22.9,30.5)	25.5 (22.0,29.3)	24.6 (21.7,27.7)	26.2 (23.2,29.3)	27.1 (24.3,30.0)	26.0 (22.9,29.3)	25.6 (22.8,28.5)	25.2 (22.3,28.1)	22.8 (19.9,25.7)	21.9 (18.6,25.4)	21.9 (17.5,26.7)	23.0 (19.4,26.9)	22.1 (18.5,26.0)	-1.9 (-3.2,-0.6)
	Female	25.9 (20.8,31.3)	25.5 (21.1,30.3)	25.2 (21.1,29.6)	24.0 (20.2,28.1)	24.7 (21.0,28.6)	26.1 (22.7,29.7)	26.7 (23.6,30.1)	26.3 (23.5,29.3)	25.4 (22.8,27.9)	24.6 (22.2,27.2)	23.0 (20.4,25.8)	22.0 (18.7,25.5)	21.2 (17.4,25.2)	21.6 (17.0,26.5)	21.5 (16.8,26.4)	23.3 (19.2,27.8)	22.4 (18.5,26.8)	-0.9 (-2.6,0.7)
	Both	27.9 (23.6,32.4)	27.4 (23.4,31.6)	27.0 (23.1,31.1)	25.4 (21.7,29.5)	25.7 (22.0,29.6)	25.8 (22.4,29.5)	25.7 (22.7,28.9)	26.3 (23.4,29.3)	26.2 (23.6,28.9)	25.3 (22.7,28.0)	24.3 (21.6,27.0)	23.5 (20.7,26.6)	22.0 (18.9,25.3)	21.8 (18.4,25.5)	21.7 (18.1,25.4)	23.1 (19.3,27.3)	22.3 (18.5,26.4)	-1.4 (-2.9,0.0)
Crittenden County, AR	Male	30.1 (26.2,34.3)	29.5 (25.7,33.4)	29.2 (25.5,33.2)	27.7 (24.1,31.6)	27.9 (24.3,31.9)	29.4 (25.6,33.5)	27.8 (24.5,31.2)	28.1 (24.9,31.5)	27.7 (24.7,30.9)	27.2 (23.8,30.7)	26.0 (23.2,29.2)	25.0 (21.9,28.1)	25.2 (22.1,28.5)	24.9 (21.5,28.7)	23.2 (18.9,27.8)	22.7 (19.0,26.8)	21.8 (18.1,25.9)	-2.0 (-3.5,-0.7)
	Female	22.6 (18.3,27.6)	22.4 (18.5,26.9)	22.3 (18.6,26.4)	21.4 (17.9,25.3)	21.5 (18.2,25.3)	21.2 (18.2,24.7)	19.7 (17.0,22.8)	19.1 (16.7,21.8)	19.6 (17.4,22.1)	19.2 (16.9,21.6)	19.0 (16.7,21.4)	19.5 (16.5,22.5)	19.5 (16.2,23.1)	19.4 (15.2,23.6)	18.6 (14.5,22.7)	17.7 (14.2,21.6)	17.1 (13.8,20.8)	-1.7 (-3.7,0.1)
	Both	26.3 (22.2,30.8)	25.9 (22.1,30.1)	25.7 (22.0,29.6)	24.5 (20.9,28.4)	24.6 (21.2,28.6)	25.2 (21.9,29.0)	23.7 (20.7,26.8)	23.5 (20.8,26.5)	23.6 (21.0,26.4)	23.1 (20.5,25.9)	22.4 (20.0,25.1)	22.2 (19.5,25.0)	22.3 (19.5,25.6)	22.1 (19.0,25.7)	20.9 (17.7,24.5)	20.2 (16.6,24.1)	19.4 (15.9,23.3)	-1.9 (-3.6,-0.4)
Cross County, AR	Male	30.0 (26.1,34.5)	29.5 (25.5,33.7)	29.2 (25.2,33.5)	28.2 (24.2,32.4)	28.2 (24.3,32.6)	30.5 (26.4,35.1)	28.3 (24.9,32.1)	27.7 (24.5,31.3)	26.7 (23.8,30.0)	26.3 (23.2,30.0)	24.3 (21.6,27.5)	23.5 (20.6,26.9)	25.0 (21.9,28.5)	24.9 (21.4,28.8)	24.6 (20.1,30.0)	24.3 (20.6,28.8)	23.3 (19.7,27.6)	-1.6 (-3.0,-0.1)
	Female	24.1 (19.6,30.0)	23.9 (19.8,29.0)	23.7 (19.8,28.4)	23.1 (19.2,27.4)	23.7 (19.9,28.3)	25.6 (21.8,29.9)	24.8 (21.4,28.6)	24.9 (21.7,28.5)	24.2 (21.4,27.3)	24.3 (21.7,27.2)	23.2 (20.6,26.2)	23.1 (19.6,26.6)	23.8 (19.9,27.8)	24.0 (19.3,28.8)	21.8 (17.3,26.6)	19.6 (15.9,24.2)	18.8 (15.3,23.2)	-1.5 (-3.5,0.4)
	Both	27.0 (23.0,32.0)	26.6 (22.7,31.2)	26.4 (22.5,30.7)	25.6 (21.6,29.9)	25.9 (22.1,30.4)	28.0 (24.2,32.3)	26.5 (23.1,30.4)	26.3 (23.2,29.8)	25.4 (22.6,28.6)	25.3 (22.5,28.5)	23.8 (21.1,26.7)	23.3 (20.4,26.5)	24.3 (21.2,28.0)	24.4 (21.0,28.4)	23.2 (19.7,27.5)	21.9 (18.2,26.5)	21.1 (17.4,25.4)	-1.6 (-3.2,0.1)
Dallas County, AR	Male	28.3 (24.3,32.5)	27.7 (23.9,31.7)	27.3 (23.6,31.3)	26.6 (22.8,30.6)	26.2 (22.6,30.4)	26.5 (22.6,30.8)	26.3 (23.0,30.0)	26.2 (23.0,29.9)	25.5 (22.6,29.0)	25.0 (21.7,28.9)	24.2 (21.2,27.7)	23.7 (20.5,27.4)	25.3 (22.0,28.9)	25.0 (21.2,29.3)	27.0 (21.9,32.8)	26.7 (22.4,31.0)	25.7 (21.5,30.1)	-0.6 (-1.9,0.8)
	Female	20.7 (15.8,26.2)	20.6 (16.2,25.6)	20.6 (16.5,25.2)	21.0 (17.1,25.4)	21.0 (17.3,25.4)	20.8 (17.5,24.8)	18.8 (16.0,22.4)	19.3 (16.7,22.6)	18.7 (16.4,21.6)	18.4 (16.1,21.2)	18.5 (16.0,21.3)	18.5 (15.4,22.1)	18.3 (14.9,22.4)	18.1 (13.9,23.0)	18.9 (14.8,23.8)	18.9 (15.0,23.2)	18.4 (14.6,22.7)	-0.7 (-2.7,1.5)
	Both	24.4 (20.1,29.2)	24.1 (20.0,28.5)	23.9 (20.0,28.2)	23.7 (19.9,28.0)	23.6 (19.9,27.8)	23.6 (20.1,27.7)	22.5 (19.5,26.2)	22.7 (19.9,26.1)	22.1 (19.6,25.2)	21.6 (19.0,24.9)	21.3 (18.7,24.4)	21.1 (18.2,24.3)	21.7 (18.6,25.2)	21.5 (18.1,25.2)	22.9 (19.0,27.0)	22.7 (18.7,27.0)	22.0 (18.0,26.3)	-0.7 (-2.3,1.1)
Desha County, AR	Male	27.7 (23.9,31.8)	27.2 (23.6,31.2)	27.0 (23.5,31.0)	26.8 (23.2,30.8)	26.1 (22.5,30.1)	27.6 (23.9,31.8)	26.9 (23.8,30.4)	26.5 (23.4,29.9)	26.6 (23.7,29.9)	26.1 (23.0,29.6)	24.0 (21.1,27.1)	23.4 (20.5,26.6)	23.8 (20.9,27.3)	21.8 (18.6,25.5)	22.4 (18.1,27.7)	23.2 (19.6,27.5)	22.3 (18.8,26.5)	-1.4 (-2.8,0.1)
	Female	20.5 (16.2,26.1)	20.3 (16.4,25.2)	20.2 (16.5,24.4)	21.2 (17.6,25.4)	21.3 (17.8,25.4)	21.1 (17.8,24.7)	20.7 (17.7,24.1)	21.3 (18.4,24.5)	20.0 (17.6,22.8)	20.4 (17.9,23.3)	19.2 (16.7,22.0)	18.1 (15.2,21.4)	16.7 (13.6,20.4)	16.2 (12.2,20.5)	15.9 (12.0,20.4)	17.9 (14.4,22.3)	17.3 (14.0,21.5)	-1.1 (-3.1,1.0)
	Both	24.1 (20.1,28.9)	23.7 (19.9,27.9)	23.6 (20.0,27.6)	23.9 (20.3,28.0)	23.7 (20.2,27.7)	24.2 (20.9,28.1)	23.7 (20.7,27.2)	23.8 (20.9,27.1)	23.3 (20.6,26.2)	23.2 (20.5,26.1)	21.5 (18.9,24.4)	20.7 (18.0,23.7)	20.2 (17.3,23.6)	19.0 (15.9,22.7)	19.1 (16.0,23.0)	20.5 (17.0,24.8)	19.7 (16.3,24.0)	-1.2 (-2.9,0.5)
Drew County, AR	Male	25.2 (21.7,29.2)	24.6 (21.3,28.6)	24.3 (21.0,28.1)	23.7 (20.4,27.6)	23.2 (20.0,27.0)	24.0 (20.8,28.2)	23.3 (20.6,26.7)	23.2 (20.6,26.6)	22.9 (20.4,25.9)	22.6 (19.8,25.9)	21.3 (18.8,24.0)	20.7 (18.1,23.4)	20.9 (18.2,23.7)	20.1 (17.1,23.3)	18.8 (14.9,23.1)	19.5 (16.3,23.3)	18.7 (15.6,22.4)	-1.9 (-3.3,-0.3)
	Female	19.4 (15.2,24.6)	19.2 (15.3,23.6)	19.0 (15.6,23.1)	18.6 (15.4,22.7)	18.6 (15.6,22.4)	19.4 (16.7,22.9)	18.8 (16.4,21.9)	19.6 (17.2,22.5)	19.3 (17.1,21.8)	19.3 (17.0,21.6)	18.1 (15.8,20.6)	18.0 (15.1,21.2)	17.3 (14.2,20.8)	17.1 (13.3,21.6)	16.1 (12.4,20.5)	16.7 (13.4,20.7)	16.1 (13.0,20.0)	-1.2 (-3.2,1.0)
	Both	22.3 (18.5,26.5)	21.9 (18.4,26.0)	21.6 (18.3,25.7)	21.2 (17.9,25.1)	20.9 (17.8,24.7)	21.7 (18.8,25.4)	21.0 (18.5,24.2)	21.4 (18.9,24.4)	21.1 (18.7,23.8)	20.9 (18.5,23.5)	19.7 (17.4,22.2)	19.3 (16.7,22.0)	19.0 (16.2,22.1)	18.6 (15.6,21.9)	17.4 (14.4,20.9)	18.1 (14.8,22.0)	17.4 (14.2,21.2)	-1.6 (-3.2,0.3)
Faulkner County, AR	Male	23.0 (20.0,26.4)	22.4 (19.6,25.6)	22.0 (19.2,25.3)	21.6 (19.0,24.8)	21.2 (18.4,24.5)	21.0 (18.2,24.3)	21.0 (18.7,23.8)	21.2 (18.9,23.9)	19.9 (17.9,22.2)	19.6 (17.3,22.2)	19.1 (17.0,21.4)	18.4 (16.2,20.9)	18.3 (16.2,20.9)	19.2 (16.5,22.2)	18.5 (14.9,22.6)	18.7 (15.9,22.1)	18.0 (15.3,21.3)	-1.5 (-2.9,-0.2)
	Female	17.4 (13.9,21.7)	17.2 (14.1,21.0)	17.2 (14.3,20.6)	16.7 (14.0,19.7)	17.7 (15.1,20.8)	17.6 (15.4,20.4)	17.6 (15.6,20.0)	16.4 (14.7,18.4)	17.0 (15.4,18.8)	16.2 (14.6,18.1)	15.8 (14.0,17.9)	15.5 (13.1,18.3)	17.1 (14.3,20.1)	15.7 (12.3,19.3)	15.3 (11.9,19.0)	15.0 (12.3,18.4)	14.5 (11.9,17.7)	-1.1 (-3.0,0.8)
	Both	20.1 (17.0,23.9)	19.8 (16.9,23.2)	19.6 (16.8,22.7)	19.1 (16.5,22.2)	19.4 (16.7,22.6)	19.3 (16.8,22.3)	19.3 (17.1,21.9)	18.8 (16.8,21.0)	18.4 (16.6,20.4)	17.8 (16.0,19.9)	17.5 (15.6,19.6)	17.0 (14.9,19.3)	17.7 (15.3,20.3)	17.4 (14.9,20.3)	16.9 (14.3,19.8)	16.9 (14.1,20.2)	16.2 (13.6,19.5)	-1.4 (-3.0,0.2)
Franklin County, AR	Male	27.6 (23.7,31.7)	26.9 (23.2,31.1)	26.5 (23.0,30.5)	25.5 (22.0,29.4)	24.7 (21.4,28.5)	25.5 (21.9,29.6)	24.4 (21.5,27.8)	25.4 (22.4,28.7)	25.4 (22.6,28.6)	24.7 (21.5,28.2)	24.2 (21.1,27.4)	24.2 (21.0,27.6)	23.7 (20.4,27.0)	22.5 (18.8,26.2)	22.8 (17.8,27.5)	23.4 (19.5,27.5)	22.5 (18.5,26.6)	-1.3 (-2.8,0.1)
	Female	24.9 (19.4,30.8)	24.6 (19.8,30.0)	24.4 (20.1,29.4)	24.7 (20.4,29.6)	24.2 (20.3,28.9)	24.6 (21.2,28.7)	24.3 (21.1,28.0)	24.0 (21.0,27.4)	23.7 (21.0,26.7)	23.2 (20.4,26.0)	22.5 (19.5,25.5)	22.3 (18.7,26.1)	23.7 (19.5,28.0)	24.0 (18.9,29.4)	22.6 (17.5,27.9)	22.7 (18.2,27.5)	21.9 (17.5,26.5)	-0.8 (-2.7,1.1)
	Both	26.2 (21.7,31.1)	25.8 (21.6,30.4)	25.5 (21.5,29.9)	25.1 (21.2,29.5)	24.5 (20.8,28.7)	25.0 (21.7,29.0)	24.3 (21.3,27.9)	24.7 (21.7,28.0)	24.5 (21.8,27.6)	23.9 (21.0,26.9)	23.3 (20.4,26.4)	23.2 (20.1,26.5)	23.7 (20.1,27.3)	23.3 (19.3,27.1)	22.7 (18.7,26.9)	23.0 (18.8,27.5)	22.2 (18.0,26.6)	-1.0 (-2.8,0.6)
Fulton County, AR	Male	27.5 (23.4,31.7)	27.0 (23.0,30.9)	26.8 (22.9,30.6)	27.2 (23.3,31.1)	26.2 (22.3,30.2)	26.4 (22.4,30.4)	25.5 (22.1,28.9)	26.5 (23.1,29.9)	25.8 (22.7,28.8)	25.8 (22.2,29.3)	26.1 (22.8,29.5)	26.0 (22.6,29.5)	24.5 (21.0,27.9)	24.6 (20.6,28.2)	23.5 (18.2,28.3)	22.9 (18.7,26.8)	22.0 (18.0,25.9)	-1.4 (-2.9,0.1)
	Female	26.4 (20.2,32.9)	26.1 (20.4,31.7)	25.8 (20.7,31.0)	24.7 (20.0,29.5)	23.2 (18.8,27.6)	22.9 (19.1,26.7)	22.5 (19.0,25.9)	22.0 (19.0,25.1)	23.1 (20.1,25.9)	24.1 (21.2,27.1)	25.6 (22.3,29.0)	25.8 (21.7,29.9)	26.1 (21.4,30.9)	24.3 (18.6,30.1)	23.2 (17.7,28.8)	22.2 (17.3,26.9)	21.4 (16.8,26.0)	-1.3 (-3.5,0.8)
	Both	27.0 (21.8,32.1)	26.5 (21.8,31.4)	26.3 (21.9,30.8)	25.9 (21.6,30.2)	24.7 (20.5,28.8)	24.6 (20.8,28.6)	23.9 (20.6,27.4)	24.2 (21.0,27.4)	24.4 (21.5,27.3)	25.0 (21.8,28.0)	25.9 (22.7,29.2)	25.9 (22.4,29.5)	25.3 (21.5,29.2)	24.4 (20.3,28.6)	23.4 (19.2,27.5)	22.5 (18.0,26.9)	21.7 (17.4,25.9)	-1.4 (-3.2,0.4)
Garland County, AR	Male	27.5 (24.2,30.9)	26.9 (23.6,30.2)	26.6 (23.2,29.9)	26.6 (23.3,29.7)	26.9 (23.5,30.2)	28.0 (24.6,31.4)	26.7 (23.6,29.5)	26.0 (22.9,28.7)	25.3 (22.4,27.7)	25.4 (22.3,28.3)	24.8 (21.9,27.4)	25.1 (22.3,27.9)	24.9 (22.0,27.9)	25.2 (21.7,28.5)	25.1 (20.6,29.8)	24.5 (20.7,28.3)	23.5 (19.8,27.3)	-1.0 (-2.3,0.3)
	Female	24.2 (20.1,28.6)	24.1 (20.4,28.1)	24.1 (20.5,27.7)	25.5 (22.0,29.1)	24.8 (21.4,28.1)	24.0 (21.0,26.8)	23.8 (21.0,26.3)	23.3 (20.9,25.5)	21.0 (18.8,23.0)	21.6 (19.5,23.8)	21.9 (19.7,24.4)	22.5 (19.6,25.8)	21.9 (18.5,25.6)	22.1 (18.0,26.6)	21.7 (17.5,26.1)	20.4 (16.7,24.2)	19.7 (16.2,23.4)	-1.3 (-2.9,0.4)
	Both	25.8 (22.2,29.7)	25.5 (22.0,29.1)	25.3 (22.0,28.7)	26.0 (22.7,29.4)	25.9 (22.4,29.1)	26.0 (22.7,29.0)	25.2 (22.3,27.9)	24.6 (22.0,27.0)	23.1 (20.6,25.2)	23.5 (21.1,25.7)	23.3 (20.8,25.8)	23.8 (21.2,26.6)	23.4 (20.4,26.5)	23.6 (20.3,27.1)	23.4 (19.9,26.8)	22.4 (18.6,26.2)	21.6 (17.9,25.3)	-1.1 (-2.5,0.4)
Grant County, AR	Male	28.1 (24.4,32.0)	27.5 (23.9,31.4)	27.2 (23.5,31.1)	26.2 (22.6,30.1)	25.8 (22.0,29.9)	25.9 (22.2,29.9)	25.5 (22.3,29.1)	24.2 (21.2,27.5)	23.6 (21.0,26.8)	22.9 (20.0,26.5)	21.6 (19.0,24.9)	21.1 (18.5,24.7)	22.2 (19.4,25.9)	22.0 (18.8,26.2)	21.7 (17.3,26.6)	21.8 (18.4,26.0)	20.9 (17.5,25.0)	-1.8 (-3.2,-0.4)
	Female	26.6 (21.2,32.3)	26.2 (21.5,31.4)	25.9 (21.5,30.6)	25.4 (21.2,30.0)	24.4 (20.3,28.9)	23.6 (19.8,27.7)	22.7 (19.4,26.4)	22.3 (19.4,25.8)	21.0 (18.5,24.1)	21.2 (18.7,24.3)	21.5 (18.8,24.7)	21.4 (18.0,25.2)	21.3 (17.6,25.6)	22.2 (17.6,27.4)	21.8 (17.2,27.1)	20.9 (17.1,25.8)	20.1 (16.4,24.7)	-1.8 (-3.6,0.2)
	Both	27.3 (22.9,32.0)	26.9 (22.7,31.2)	26.5 (22.6,30.7)	25.8 (21.9,30.0)	25.1 (21.1,29.4)	24.7 (21.0,28.8)	24.1 (20.9,27.7)	23.2 (20.3,26.6)	22.3 (19.7,25.4)	22.1 (19.5,25.2)	21.5 (19.0,24.8)	21.2 (18.5,24.6)	21.8 (18.7,25.4)	22.1 (18.8,26.0)	21.7 (18.4,26.2)	21.3 (17.7,25.9)	20.5 (16.9,24.8)	-1.8 (-3.4,-0.1)
Greene County, AR	Male	32.1 (28.0,36.7)	31.4 (27.5,35.8)	31.0 (27.2,35.4)	30.6 (26.8,35.0)	29.8 (26.0,34.1)	29.8 (25.9,34.0)	30.1 (26.7,33.7)	29.9 (26.8,33.4)	29.1 (26.4,32.2)	28.4 (25.1,31.9)	27.3 (24.5,30.3)	25.7 (22.8,28.8)	25.2 (22.2,28.3)	24.5 (21.2,28.2)	24.0 (19.3,28.8)	25.7 (21.7,29.9)	24.7 (20.8,28.9)	-1.6 (-3.1,-0.4)
	Female	25.2 (20.2,31.4)	25.1 (20.6,30.6)	25.0 (20.7,29.9)	25.2 (21.2,30.1)	23.4 (19.7,27.8)	23.9 (20.7,27.7)	25.0 (21.9,28.4)	25.0 (22.3,27.9)	24.4 (22.0,26.9)	24.4 (22.1,27.0)	23.9 (21.3,26.7)	23.2 (19.7,26.7)	23.6 (19.5,27.6)	23.7 (18.5,28.4)	24.3 (19.1,29.0)	24.0 (19.6,28.7)	23.1 (18.9,27.6)	-0.6 (-2.4,1.2)
	Both	28.6 (24.2,33.9)	28.2 (24.0,33.1)	27.9 (24.0,32.7)	27.9 (24.0,32.5)	26.5 (22.8,30.8)	26.8 (23.2,30.8)	27.5 (24.3,31.0)	27.4 (24.5,30.6)	26.7 (24.1,29.5)	26.4 (23.7,29.2)	25.6 (23.0,28.4)	24.4 (21.5,27.4)	24.4 (21.1,27.7)	24.1 (20.5,27.9)	24.1 (20.4,28.2)	24.8 (20.6,29.2)	23.9 (19.8,28.3)	-1.1 (-2.7,0.3)
Hempstead County, AR	Male	28.0 (24.3,32.3)	27.4 (23.8,31.4)	26.9 (23.5,30.9)	27.0 (23.5,31.0)	26.2 (22.5,30.1)	26.8 (23.2,31.0)	24.8 (21.8,28.2)	24.8 (21.8,27.9)	24.5 (21.7,27.5)	24.1 (21.1,27.5)	23.5 (20.7,26.6)	22.9 (20.1,26.0)	22.0 (19.2,24.9)	21.4 (18.3,24.9)	20.4 (16.1,24.9)	20.2 (17.0,24.1)	19.4 (16.1,23.3)	-2.3 (-3.6,-0.9)
	Female	21.2 (16.6,26.8)	20.9 (16.8,25.7)	20.6 (16.8,25.2)	20.2 (16.8,24.4)	20.4 (17.1,24.4)	20.6 (17.4,24.0)	19.3 (16.6,22.4)	19.3 (16.8,22.2)	19.2 (17.0,21.8)	18.8 (16.6,21.2)	19.6 (17.3,22.2)	20.0 (17.3,23.1)	19.5 (16.6,23.0)	20.2 (16.3,24.5)	19.6 (16.0,24.0)	17.5 (14.1,21.6)	16.8 (13.6,20.8)	-1.4 (-3.3,0.6)
	Both	24.5 (20.5,29.3)	24.1 (20.3,28.6)	23.7 (20.2,28.0)	23.5 (20.1,27.6)	23.2 (19.8,27.1)	23.6 (20.2,27.4)	22.0 (19.2,25.1)	22.0 (19.2,25.0)	21.8 (19.3,24.6)	21.4 (18.9,24.2)	21.5 (19.0,24.2)	21.4 (18.8,24.3)	20.7 (18.0,24.0)	20.8 (17.8,24.3)	20.0 (16.9,23.7)	18.8 (15.5,22.8)	18.1 (14.8,22.0)	-1.9 (-3.4,-0.3)
Hot Spring County, AR	Male	27.4 (23.9,31.5)	26.7 (23.5,30.7)	26.4 (23.2,30.4)	26.0 (22.8,30.1)	26.1 (22.6,30.3)	27.0 (23.5,31.2)	27.0 (23.8,30.7)	26.5 (23.4,30.0)	25.9 (23.0,29.0)	25.9 (22.6,29.5)	25.3 (22.4,28.5)	25.2 (22.1,28.5)	25.3 (22.1,28.7)	26.2 (22.6,30.0)	26.1 (21.0,31.3)	26.4 (22.3,30.4)	25.4 (21.3,29.2)	-0.5 (-1.8,0.8)
	Female	23.8 (19.3,29.2)	23.6 (19.6,28.5)	23.5 (19.7,28.0)	23.8 (20.3,28.3)	23.0 (19.6,27.2)	22.5 (19.3,26.4)	22.0 (19.0,25.5)	22.5 (19.8,25.6)	21.2 (18.9,23.8)	21.6 (19.3,24.2)	21.9 (19.4,24.7)	21.7 (18.5,25.1)	20.4 (16.9,24.2)	20.5 (16.1,25.0)	21.5 (17.1,26.2)	22.1 (17.9,26.3)	21.4 (17.4,25.5)	-0.7 (-2.4,1.0)
	Both	25.6 (21.7,30.2)	25.2 (21.5,29.5)	24.9 (21.5,29.1)	24.9 (21.5,29.1)	24.5 (21.1,28.8)	24.7 (21.5,28.8)	24.4 (21.4,28.0)	24.5 (21.6,27.7)	23.5 (21.0,26.3)	23.7 (21.2,26.6)	23.6 (21.0,26.4)	23.4 (20.5,26.5)	22.8 (19.7,26.2)	23.3 (19.9,27.0)	23.8 (19.9,27.7)	24.2 (20.0,28.3)	23.3 (19.3,27.3)	-0.6 (-2.0,0.8)
Howard County, AR	Male	27.3 (23.7,31.4)	26.6 (23.0,30.5)	26.1 (22.5,29.9)	25.3 (21.9,29.2)	24.3 (20.7,28.0)	24.7 (21.0,28.5)	23.6 (20.5,26.8)	24.1 (21.0,27.2)	24.7 (21.7,27.7)	24.8 (21.6,28.2)	24.6 (21.3,27.8)	24.5 (21.3,27.9)	24.6 (21.4,27.9)	23.3 (20.0,27.0)	23.0 (18.7,27.9)	22.2 (18.7,26.2)	21.2 (17.8,25.2)	-1.6 (-3.0,-0.1)
	Female	22.9 (18.2,28.4)	22.7 (18.5,27.6)	22.5 (18.6,27.1)	21.7 (18.0,26.0)	22.0 (18.1,26.1)	22.3 (18.7,26.0)	21.3 (18.1,24.7)	21.4 (18.4,24.6)	21.4 (18.7,24.1)	20.8 (18.2,23.4)	20.6 (17.9,23.5)	19.9 (16.7,23.5)	20.4 (16.8,24.7)	20.2 (15.8,25.2)	20.8 (16.5,26.0)	20.0 (16.2,24.5)	19.2 (15.6,23.5)	-1.1 (-3.0,0.9)
	Both	25.1 (21.0,29.7)	24.6 (20.8,29.0)	24.3 (20.6,28.5)	23.5 (20.0,27.6)	23.1 (19.4,27.0)	23.5 (19.9,27.2)	22.4 (19.3,25.7)	22.7 (19.8,25.8)	23.0 (20.2,25.8)	22.7 (19.9,25.6)	22.6 (19.7,25.5)	22.2 (19.3,25.3)	22.5 (19.2,26.2)	21.7 (18.3,25.6)	21.9 (18.4,25.9)	21.1 (17.4,25.3)	20.2 (16.7,24.4)	-1.4 (-2.9,0.3)
Independence County, AR	Male	28.0 (24.2,32.0)	27.4 (23.8,31.1)	27.1 (23.6,30.9)	26.5 (22.9,30.2)	26.5 (22.8,30.3)	26.3 (22.7,30.3)	24.5 (21.6,27.7)	23.2 (20.5,26.3)	22.5 (20.0,25.2)	22.4 (19.5,25.5)	22.5 (19.8,25.3)	22.1 (19.3,25.0)	22.9 (19.9,26.0)	23.0 (19.5,26.6)	22.1 (17.6,26.8)	22.5 (18.7,26.7)	21.6 (17.9,25.7)	-1.6 (-3.1,-0.3)
	Female	24.7 (19.9,30.8)	24.3 (19.8,29.7)	24.0 (19.9,28.8)	23.7 (19.6,27.9)	22.8 (19.1,26.8)	22.1 (19.1,25.5)	22.0 (19.4,25.1)	22.6 (20.2,25.3)	21.3 (19.2,23.7)	21.0 (18.7,23.6)	20.4 (17.9,23.2)	19.2 (15.9,22.7)	18.8 (14.9,22.7)	19.8 (15.0,24.8)	19.5 (14.7,24.4)	20.7 (16.7,25.5)	20.1 (16.2,24.7)	-1.3 (-3.3,0.6)
	Both	26.3 (22.0,31.3)	25.9 (21.9,30.3)	25.6 (21.6,29.5)	25.1 (21.2,28.9)	24.6 (21.0,28.5)	24.2 (21.0,27.8)	23.2 (20.5,26.4)	22.9 (20.3,25.7)	21.9 (19.6,24.4)	21.7 (19.3,24.2)	21.4 (18.9,24.1)	20.6 (17.9,23.7)	20.8 (17.7,24.2)	21.4 (18.0,25.2)	20.8 (17.3,24.8)	21.6 (17.7,26.1)	20.8 (17.0,25.2)	-1.5 (-3.2,0.1)
Izard County, AR	Male	27.8 (23.7,31.8)	27.2 (23.3,31.2)	26.9 (23.1,31.0)	26.6 (22.8,30.5)	25.7 (21.9,29.7)	25.4 (21.6,29.3)	24.6 (21.3,27.8)	24.1 (21.1,27.3)	23.7 (20.9,26.7)	23.7 (20.5,27.0)	24.1 (21.2,27.3)	24.0 (21.0,27.2)	24.5 (21.3,27.8)	24.3 (20.7,28.0)	24.0 (19.5,28.7)	23.1 (19.2,27.3)	22.2 (18.4,26.4)	-1.4 (-2.9,0.1)
	Female	24.8 (19.5,30.3)	24.6 (19.8,29.5)	24.5 (19.9,29.1)	24.2 (19.8,28.7)	23.4 (19.2,27.8)	23.0 (19.3,27.1)	22.3 (18.9,26.0)	22.5 (19.5,25.9)	21.6 (19.0,24.5)	22.0 (19.3,25.0)	21.9 (19.2,25.0)	20.9 (17.4,25.0)	20.2 (16.4,24.7)	20.7 (16.0,26.1)	20.8 (16.0,26.2)	22.0 (17.6,26.9)	21.2 (17.0,25.9)	-1.0 (-2.8,1.0)
	Both	26.3 (21.7,30.8)	25.9 (21.4,30.2)	25.7 (21.5,30.0)	25.4 (21.3,29.6)	24.5 (20.5,28.8)	24.2 (20.5,28.0)	23.4 (20.1,26.8)	23.3 (20.3,26.6)	22.6 (20.0,25.6)	22.8 (20.0,25.7)	23.0 (20.2,26.1)	22.5 (19.5,25.7)	22.3 (19.0,26.1)	22.5 (19.0,26.6)	22.4 (18.4,26.5)	22.6 (18.4,27.1)	21.7 (17.6,26.2)	-1.2 (-2.8,0.5)
Jackson County, AR	Male	30.7 (26.9,35.2)	30.0 (26.4,34.4)	29.5 (25.9,33.8)	28.8 (25.2,33.1)	28.2 (24.4,32.3)	29.3 (25.5,33.7)	28.5 (25.2,32.0)	27.8 (24.6,31.4)	27.7 (24.6,31.1)	27.5 (24.0,31.4)	26.4 (23.2,29.8)	25.8 (22.5,29.3)	27.6 (24.1,31.4)	26.4 (22.7,30.9)	25.5 (20.7,31.2)	26.6 (22.4,31.4)	25.7 (21.5,30.4)	-1.1 (-2.5,0.2)
	Female	25.3 (20.3,31.6)	25.1 (20.5,30.7)	24.8 (20.8,30.0)	25.3 (21.4,30.2)	24.3 (20.4,28.8)	25.5 (21.9,29.5)	24.1 (20.8,27.8)	24.9 (21.8,28.2)	24.2 (21.4,27.2)	25.7 (22.8,28.7)	24.8 (21.8,28.0)	24.5 (20.6,28.5)	25.6 (21.2,30.1)	25.3 (19.7,30.7)	23.2 (17.7,28.7)	23.5 (19.1,28.6)	22.7 (18.5,27.7)	-0.7 (-2.7,1.1)
	Both	27.9 (23.6,33.2)	27.5 (23.6,32.5)	27.1 (23.4,31.8)	27.0 (23.3,31.6)	26.2 (22.4,30.6)	27.4 (23.8,31.6)	26.3 (23.0,29.9)	26.3 (23.2,29.7)	26.0 (23.0,29.1)	26.6 (23.5,29.9)	25.6 (22.5,28.7)	25.1 (22.0,28.6)	26.6 (23.0,30.6)	25.8 (21.9,30.2)	24.3 (20.5,29.0)	25.0 (20.7,30.0)	24.2 (20.0,29.0)	-0.9 (-2.6,0.6)
Jefferson County, AR	Male	27.9 (24.3,31.7)	27.3 (23.9,31.1)	27.1 (23.6,30.7)	25.8 (22.4,29.5)	26.0 (22.7,29.7)	26.5 (23.1,30.3)	25.7 (22.9,29.0)	24.7 (22.0,27.9)	24.3 (21.8,27.3)	23.6 (20.7,26.8)	22.7 (20.3,25.6)	22.0 (19.3,24.9)	22.8 (20.1,25.9)	22.7 (19.6,26.1)	22.0 (17.8,26.6)	22.1 (18.8,26.1)	21.2 (18.0,25.1)	-1.7 (-3.0,-0.3)
	Female	20.4 (16.5,25.2)	20.1 (16.7,24.4)	20.0 (16.7,23.7)	20.3 (17.1,23.8)	21.0 (17.9,24.4)	20.5 (17.7,23.5)	20.3 (17.9,23.2)	19.7 (17.5,22.3)	17.9 (16.0,20.1)	17.2 (15.4,19.4)	18.0 (16.1,20.3)	18.0 (15.6,20.8)	17.6 (14.9,20.6)	17.6 (14.4,21.2)	16.5 (13.2,20.2)	15.6 (12.9,19.0)	15.0 (12.4,18.3)	-1.9 (-3.7,-0.1)
	Both	24.1 (20.4,28.3)	23.7 (20.3,27.6)	23.4 (20.1,27.1)	23.0 (19.8,26.6)	23.5 (20.3,27.0)	23.4 (20.5,26.8)	23.0 (20.3,26.1)	22.1 (19.7,25.0)	21.0 (18.8,23.6)	20.3 (18.2,22.9)	20.3 (18.2,22.9)	20.0 (17.7,22.5)	20.1 (17.7,23.0)	20.1 (17.5,23.3)	19.2 (16.5,22.6)	18.8 (15.8,22.5)	18.1 (15.2,21.6)	-1.8 (-3.3,-0.2)
Johnson County, AR	Male	27.9 (24.2,31.9)	27.2 (23.7,31.1)	26.8 (23.3,30.7)	26.3 (22.9,30.1)	25.6 (22.2,29.7)	26.8 (23.2,30.9)	25.2 (22.3,28.8)	25.5 (22.6,29.0)	25.9 (23.2,29.1)	24.7 (21.7,28.2)	24.5 (21.7,27.8)	25.0 (22.2,28.4)	24.1 (21.3,27.5)	22.2 (19.1,26.0)	22.3 (18.1,27.1)	21.6 (18.1,25.4)	20.7 (17.4,24.5)	-1.9 (-3.3,-0.5)
	Female	25.2 (19.9,31.0)	25.0 (20.3,30.1)	24.8 (20.6,29.7)	25.1 (21.0,29.8)	24.8 (21.1,29.2)	25.6 (22.2,29.7)	25.1 (21.9,28.9)	24.1 (21.3,27.4)	23.6 (21.1,26.7)	23.5 (21.0,26.4)	22.6 (20.0,25.6)	22.1 (19.0,25.8)	22.8 (19.3,26.9)	21.9 (17.6,26.8)	20.4 (16.2,25.3)	19.3 (15.7,23.6)	18.6 (15.2,22.8)	-1.9 (-3.7,0.1)
	Both	26.5 (22.2,31.2)	26.1 (22.1,30.6)	25.8 (22.0,30.1)	25.7 (21.9,29.9)	25.2 (21.6,29.5)	26.2 (22.7,30.2)	25.1 (22.1,28.8)	24.8 (22.0,28.1)	24.8 (22.1,27.9)	24.1 (21.6,27.2)	23.5 (21.0,26.6)	23.5 (20.8,26.9)	23.4 (20.5,27.0)	22.0 (18.9,25.9)	21.3 (18.1,25.2)	20.4 (16.8,24.5)	19.6 (16.3,23.7)	-1.9 (-3.4,-0.2)
Lafayette County, AR	Male	26.7 (23.2,30.9)	26.2 (22.8,30.2)	26.1 (22.6,30.1)	25.8 (22.4,30.1)	25.1 (21.5,29.4)	26.6 (22.8,31.1)	25.2 (22.1,28.9)	25.5 (22.4,29.2)	25.1 (22.2,28.4)	24.3 (21.1,28.1)	23.2 (20.3,26.5)	23.1 (20.2,26.5)	23.9 (20.8,27.3)	23.1 (19.6,27.0)	23.3 (18.5,28.1)	23.1 (19.3,27.2)	22.2 (18.4,26.4)	-1.1 (-2.6,0.2)
	Female	20.8 (16.4,25.9)	20.6 (16.7,25.3)	20.4 (16.8,24.9)	20.5 (16.9,25.0)	20.9 (17.3,25.5)	20.8 (17.5,24.8)	19.6 (16.7,23.1)	20.4 (17.6,23.7)	19.8 (17.4,22.7)	20.0 (17.6,22.6)	19.5 (17.0,22.4)	20.1 (17.0,23.5)	19.6 (16.1,23.5)	19.9 (15.5,24.6)	19.8 (15.4,24.4)	17.8 (14.0,22.0)	17.1 (13.5,21.2)	-1.2 (-3.4,0.8)
	Both	23.7 (20.0,28.3)	23.3 (19.8,27.7)	23.2 (19.6,27.5)	23.1 (19.5,27.6)	23.0 (19.3,27.5)	23.7 (20.2,27.9)	22.4 (19.3,26.0)	22.9 (20.0,26.4)	22.4 (19.8,25.4)	22.1 (19.4,25.1)	21.3 (18.7,24.3)	21.6 (18.8,24.7)	21.7 (18.6,25.2)	21.5 (18.1,25.3)	21.5 (17.9,25.4)	20.4 (16.7,24.5)	19.6 (15.9,23.7)	-1.2 (-2.9,0.4)
Lawrence County, AR	Male	32.0 (27.8,36.0)	31.4 (27.4,35.4)	31.1 (27.2,35.2)	30.4 (26.5,34.5)	29.8 (25.6,34.0)	29.6 (25.6,33.9)	28.7 (25.2,32.5)	27.7 (24.3,31.5)	27.5 (24.4,31.1)	27.2 (23.6,31.2)	26.3 (23.0,29.8)	24.6 (21.3,28.3)	25.6 (22.3,29.3)	24.4 (20.5,28.6)	23.8 (18.9,29.0)	25.6 (21.6,30.1)	24.6 (20.7,29.0)	-1.6 (-3.0,-0.3)
	Female	27.0 (21.7,33.0)	26.7 (21.9,32.0)	26.5 (22.0,31.6)	26.6 (22.2,31.4)	25.4 (21.3,29.7)	25.7 (21.9,29.8)	26.4 (22.8,30.4)	26.0 (22.8,29.6)	25.1 (22.3,28.2)	25.5 (22.6,28.7)	24.5 (21.5,28.0)	22.9 (19.4,27.0)	23.9 (19.8,28.5)	22.9 (17.9,28.2)	22.9 (18.0,28.5)	23.6 (19.2,28.8)	22.8 (18.6,27.9)	-1.1 (-2.8,0.7)
	Both	29.4 (24.9,34.4)	29.0 (24.6,33.7)	28.8 (24.6,33.2)	28.5 (24.3,32.9)	27.5 (23.4,31.9)	27.6 (23.7,31.9)	27.5 (24.0,31.5)	26.8 (23.6,30.4)	26.3 (23.4,29.6)	26.3 (23.2,29.6)	25.4 (22.4,28.7)	23.7 (20.6,27.4)	24.7 (21.3,28.8)	23.6 (19.9,28.0)	23.3 (19.4,28.0)	24.6 (20.4,29.5)	23.7 (19.6,28.4)	-1.4 (-2.9,0.2)
Lee County, AR	Male	28.7 (24.6,33.2)	28.3 (24.3,32.6)	28.2 (24.3,32.6)	27.4 (23.6,31.7)	27.3 (23.4,31.8)	28.1 (23.9,32.6)	27.3 (23.8,31.2)	27.6 (24.1,31.5)	27.6 (24.3,31.3)	27.3 (23.5,31.5)	26.7 (23.1,30.4)	26.7 (23.0,30.6)	27.5 (23.9,31.5)	28.6 (24.3,33.1)	27.8 (22.4,33.8)	27.1 (22.6,32.0)	26.1 (21.8,30.9)	-0.6 (-2.1,0.8)
	Female	21.4 (16.4,27.3)	21.3 (16.8,26.3)	21.2 (17.2,26.0)	21.4 (17.6,26.0)	22.5 (18.6,27.1)	22.1 (18.7,26.4)	20.6 (17.3,24.5)	20.5 (17.5,24.1)	20.4 (17.5,23.4)	19.6 (16.9,22.6)	19.6 (16.8,22.6)	19.7 (16.2,23.5)	19.7 (15.7,24.0)	20.0 (15.2,25.0)	19.4 (14.6,24.4)	18.8 (14.7,23.6)	18.1 (14.2,22.6)	-1.0 (-3.4,1.0)
	Both	25.0 (20.5,30.0)	24.7 (20.6,29.3)	24.6 (20.7,29.1)	24.4 (20.5,28.8)	24.9 (20.9,29.4)	25.1 (21.2,29.3)	23.9 (20.5,27.8)	24.0 (20.8,27.7)	23.9 (20.9,27.3)	23.4 (20.2,26.8)	23.1 (20.0,26.4)	23.2 (20.0,26.7)	23.6 (19.9,27.4)	24.3 (20.3,28.5)	23.5 (19.6,28.0)	22.9 (18.6,27.8)	22.0 (17.9,26.7)	-0.8 (-2.7,0.9)
Lincoln County, AR	Male	27.0 (23.1,30.9)	26.4 (22.6,30.2)	26.2 (22.3,30.1)	25.9 (22.0,29.9)	25.1 (21.0,29.1)	26.2 (22.1,30.4)	25.8 (22.2,29.4)	26.1 (22.6,29.7)	25.9 (22.7,29.3)	25.5 (21.9,29.3)	24.1 (20.9,27.6)	24.0 (20.7,27.7)	26.0 (22.6,29.7)	25.0 (21.1,29.2)	25.0 (19.9,30.3)	25.1 (21.0,29.5)	24.2 (20.2,28.5)	-0.7 (-2.1,0.7)
	Female	21.7 (16.8,27.0)	21.5 (17.1,26.3)	21.4 (17.4,25.7)	22.7 (18.5,27.0)	22.9 (18.6,27.4)	24.1 (19.9,28.4)	23.8 (19.9,27.9)	23.5 (20.2,27.2)	21.9 (19.1,25.0)	21.6 (18.9,24.6)	20.5 (17.8,23.7)	19.5 (16.1,23.3)	20.0 (16.2,24.1)	20.7 (16.0,25.6)	19.5 (14.9,24.3)	20.3 (16.1,24.9)	19.5 (15.5,24.0)	-0.7 (-2.7,1.4)
	Both	24.3 (20.1,28.8)	23.9 (20.0,28.0)	23.8 (19.7,27.8)	24.3 (20.1,28.4)	24.0 (19.8,28.2)	25.1 (21.0,29.4)	24.8 (21.1,28.5)	24.8 (21.4,28.4)	23.8 (20.8,27.2)	23.5 (20.5,26.9)	22.3 (19.4,25.5)	21.7 (18.6,25.2)	22.9 (19.5,26.8)	22.8 (19.1,27.0)	22.2 (18.3,26.3)	22.7 (18.4,27.1)	21.8 (17.8,26.2)	-0.7 (-2.3,1.0)
Little River County, AR	Male	27.5 (23.7,31.5)	26.9 (23.3,30.9)	26.5 (22.8,30.5)	26.6 (22.9,30.6)	26.0 (22.1,29.9)	27.0 (23.1,31.2)	25.5 (22.3,29.1)	25.6 (22.5,29.0)	24.8 (21.9,28.0)	24.6 (21.2,28.1)	24.3 (21.2,27.6)	23.8 (20.7,27.2)	24.4 (21.3,27.8)	23.6 (20.0,27.6)	23.9 (19.2,29.1)	22.8 (18.9,27.1)	21.9 (18.2,26.0)	-1.4 (-2.9,0.0)
	Female	22.2 (17.6,27.9)	22.0 (17.6,27.0)	21.9 (17.7,26.4)	22.6 (18.6,27.2)	22.6 (18.6,26.9)	22.4 (18.8,26.4)	20.7 (17.5,24.4)	20.4 (17.5,23.6)	20.0 (17.5,22.9)	20.9 (18.3,23.8)	21.1 (18.5,24.2)	21.5 (18.1,25.1)	21.8 (18.1,26.0)	21.6 (16.9,26.6)	20.5 (15.9,25.5)	19.6 (15.5,24.3)	18.8 (14.9,23.3)	-1.0 (-3.1,1.0)
	Both	24.8 (20.6,29.6)	24.4 (20.4,28.7)	24.1 (20.4,28.3)	24.6 (20.7,28.9)	24.2 (20.3,28.4)	24.7 (21.0,28.6)	23.1 (19.9,26.6)	22.9 (19.9,26.2)	22.4 (19.7,25.4)	22.7 (19.9,25.8)	22.6 (19.9,25.7)	22.6 (19.8,26.0)	23.1 (20.0,26.7)	22.6 (19.3,26.5)	22.2 (18.7,26.2)	21.2 (17.2,25.7)	20.3 (16.5,24.6)	-1.3 (-3.0,0.4)
Logan County, AR	Male	29.5 (25.9,33.7)	28.9 (25.3,32.9)	28.5 (24.9,32.3)	27.9 (24.3,31.8)	27.5 (23.7,31.5)	28.9 (25.2,32.9)	27.4 (24.3,30.9)	28.0 (24.8,31.6)	27.3 (24.4,30.5)	27.1 (24.0,30.7)	26.3 (23.4,29.7)	25.8 (22.8,29.4)	25.5 (22.5,29.0)	25.7 (22.2,29.7)	24.0 (19.5,29.1)	24.2 (20.5,28.4)	23.3 (19.6,27.5)	-1.5 (-2.9,-0.2)
	Female	26.7 (21.3,32.9)	26.5 (21.7,32.0)	26.4 (22.1,31.5)	27.3 (23.1,32.0)	27.7 (23.6,32.1)	27.3 (23.5,31.4)	26.4 (23.0,30.3)	26.2 (22.9,29.6)	25.9 (23.1,28.9)	24.7 (22.0,27.7)	23.9 (21.0,27.1)	23.6 (19.8,27.6)	23.9 (19.6,28.4)	24.3 (19.1,29.6)	23.3 (18.1,28.6)	23.3 (18.9,28.2)	22.5 (18.4,27.3)	-1.1 (-2.9,0.7)
	Both	28.1 (23.6,33.3)	27.7 (23.6,32.4)	27.4 (23.6,31.8)	27.6 (23.7,31.9)	27.6 (23.6,31.8)	28.1 (24.4,32.1)	26.9 (23.6,30.6)	27.0 (23.9,30.5)	26.6 (23.7,29.7)	25.9 (23.1,29.0)	25.1 (22.2,28.3)	24.7 (21.6,28.0)	24.7 (21.2,28.4)	24.9 (21.1,29.1)	23.6 (20.0,27.8)	23.7 (19.7,28.2)	22.9 (19.0,27.4)	-1.3 (-2.9,0.3)
Lonoke County, AR	Male	26.3 (23.0,30.3)	25.7 (22.5,29.4)	25.3 (22.0,29.0)	24.3 (21.1,27.9)	23.9 (20.6,27.7)	24.0 (20.8,27.7)	24.2 (21.3,27.5)	24.6 (21.7,27.8)	23.7 (21.2,26.7)	23.8 (20.9,27.1)	23.2 (20.5,26.2)	21.8 (19.1,24.9)	21.1 (18.3,24.2)	20.7 (17.4,24.2)	19.4 (15.3,23.7)	20.7 (17.3,24.5)	19.8 (16.5,23.6)	-1.8 (-3.2,-0.4)
	Female	23.9 (19.5,29.5)	23.4 (19.4,28.4)	23.0 (19.4,27.5)	22.1 (18.7,26.2)	22.4 (19.1,26.3)	23.3 (20.1,26.8)	24.1 (21.1,27.5)	22.5 (19.9,25.5)	21.3 (19.0,23.9)	20.3 (18.0,22.7)	19.0 (16.7,21.6)	17.5 (14.4,20.5)	19.4 (15.7,22.8)	19.7 (15.3,23.9)	19.0 (14.6,23.2)	18.5 (14.9,22.6)	17.8 (14.4,21.7)	-1.8 (-3.8,-0.1)
	Both	25.1 (21.2,29.9)	24.5 (20.9,28.8)	24.1 (20.8,28.1)	23.2 (19.9,27.1)	23.1 (19.8,27.0)	23.6 (20.5,27.2)	24.1 (21.2,27.6)	23.5 (20.7,26.5)	22.5 (20.1,25.2)	22.0 (19.6,24.8)	21.1 (18.6,23.7)	19.6 (17.0,22.4)	20.2 (17.1,23.4)	20.2 (16.8,23.5)	19.2 (16.0,22.8)	19.6 (16.1,23.5)	18.8 (15.4,22.7)	-1.8 (-3.5,-0.3)
Madison County, AR	Male	28.9 (24.9,33.0)	28.2 (24.3,32.2)	27.8 (23.8,31.8)	26.6 (22.6,30.4)	26.2 (22.3,30.3)	25.6 (21.5,29.6)	24.4 (21.1,27.6)	25.1 (21.9,28.3)	25.3 (22.1,28.2)	23.9 (20.6,27.1)	23.7 (20.6,26.9)	23.8 (20.6,27.2)	23.4 (20.2,26.6)	23.7 (20.1,27.4)	24.9 (20.1,29.9)	24.3 (20.5,28.5)	23.3 (19.6,27.7)	-1.4 (-2.8,0.0)
	Female	25.5 (20.4,31.0)	25.2 (20.4,30.1)	25.1 (20.4,29.7)	24.5 (20.1,29.0)	24.2 (19.9,28.6)	24.8 (20.9,28.8)	24.8 (21.2,28.6)	24.5 (21.1,28.0)	24.2 (21.2,27.4)	24.0 (21.0,27.1)	23.2 (20.1,26.2)	21.7 (18.2,25.5)	21.9 (18.0,26.1)	21.3 (16.3,26.1)	21.0 (16.2,26.2)	21.7 (17.4,26.5)	20.9 (17.0,25.7)	-1.2 (-3.2,0.6)
	Both	27.2 (22.6,31.7)	26.7 (22.3,31.1)	26.4 (22.2,30.8)	25.5 (21.3,29.7)	25.2 (21.0,29.3)	25.2 (21.3,29.1)	24.6 (21.2,28.1)	24.8 (21.4,28.1)	24.7 (21.6,27.7)	24.0 (21.0,27.0)	23.4 (20.5,26.5)	22.7 (19.5,26.0)	22.6 (19.2,26.3)	22.4 (18.8,26.4)	22.9 (19.2,27.0)	22.9 (18.9,27.5)	22.1 (18.2,26.6)	-1.3 (-2.9,0.3)
Marion County, AR	Male	28.3 (24.6,32.4)	27.7 (24.0,31.7)	27.4 (23.6,31.4)	26.5 (22.8,30.6)	26.1 (22.4,30.2)	26.7 (22.8,30.9)	26.6 (23.3,30.2)	26.2 (23.0,29.8)	25.5 (22.6,28.9)	25.1 (21.9,28.6)	24.9 (22.0,28.1)	23.3 (20.4,26.6)	22.6 (19.5,25.9)	23.2 (19.6,27.1)	24.5 (19.5,29.5)	24.2 (20.2,28.3)	23.2 (19.4,27.2)	-1.2 (-2.6,0.1)
	Female	27.5 (21.9,33.6)	27.2 (22.2,32.8)	27.0 (22.4,32.0)	28.2 (23.8,33.1)	27.0 (22.7,31.7)	26.0 (22.3,30.2)	25.0 (21.6,29.0)	23.8 (20.8,27.1)	22.6 (20.0,25.5)	22.4 (19.8,25.3)	22.2 (19.3,25.2)	21.3 (18.1,24.8)	20.9 (17.3,24.7)	20.5 (16.3,24.9)	20.8 (16.3,25.3)	20.8 (16.7,25.2)	20.0 (16.1,24.3)	-2.0 (-3.7,-0.1)
	Both	27.9 (23.4,33.0)	27.4 (23.2,32.1)	27.2 (23.1,31.6)	27.4 (23.3,31.8)	26.5 (22.5,30.9)	26.4 (22.6,30.5)	25.8 (22.4,29.5)	25.0 (21.9,28.5)	24.0 (21.3,27.1)	23.7 (21.1,26.7)	23.5 (20.7,26.5)	22.3 (19.3,25.6)	21.7 (18.5,25.1)	21.8 (18.4,25.5)	22.6 (18.9,26.6)	22.5 (18.4,26.7)	21.6 (17.7,25.7)	-1.6 (-3.1,0.0)
Miller County, AR	Male	28.0 (24.5,31.7)	27.4 (24.1,31.1)	27.1 (23.8,30.8)	26.8 (23.5,30.5)	27.0 (23.6,30.9)	28.2 (24.7,32.2)	26.6 (23.5,29.9)	26.8 (23.8,30.1)	26.5 (23.7,29.4)	26.4 (23.3,30.0)	26.6 (23.9,29.7)	26.9 (24.0,30.1)	27.2 (24.1,30.4)	26.3 (22.9,30.1)	25.6 (21.0,30.8)	24.7 (20.9,28.8)	23.7 (20.0,27.9)	-1.0 (-2.4,0.2)
	Female	22.1 (17.7,27.0)	22.0 (18.1,26.3)	21.9 (18.4,26.0)	22.8 (19.4,26.7)	22.7 (19.5,26.4)	23.0 (19.9,26.3)	22.1 (19.3,25.0)	22.0 (19.6,24.7)	20.2 (18.1,22.5)	21.8 (19.5,24.4)	22.5 (19.9,25.2)	23.5 (20.2,26.9)	23.8 (20.2,27.9)	23.8 (19.5,28.7)	22.8 (18.4,27.5)	19.8 (16.2,24.1)	19.1 (15.6,23.1)	-0.9 (-2.7,1.0)
	Both	25.0 (21.1,29.2)	24.7 (21.1,28.5)	24.5 (21.1,28.2)	24.8 (21.4,28.6)	24.8 (21.5,28.6)	25.6 (22.4,29.2)	24.3 (21.4,27.4)	24.4 (21.7,27.3)	23.3 (20.9,25.9)	24.1 (21.6,26.8)	24.5 (22.0,27.4)	25.2 (22.2,28.3)	25.5 (22.2,29.0)	25.0 (21.7,28.7)	24.2 (20.7,28.1)	22.2 (18.5,26.4)	21.4 (17.8,25.4)	-1.0 (-2.5,0.5)
Mississippi County, AR	Male	31.2 (27.2,35.4)	30.6 (26.7,34.6)	30.2 (26.3,34.1)	28.2 (24.4,32.1)	27.8 (24.1,31.8)	28.2 (24.3,32.2)	27.9 (24.6,31.4)	29.1 (25.9,32.5)	28.8 (25.8,32.0)	28.7 (25.2,32.2)	28.0 (25.0,31.3)	26.5 (23.5,29.8)	26.4 (23.2,29.6)	25.5 (21.9,29.2)	25.2 (20.5,30.0)	25.7 (21.9,29.5)	24.8 (21.2,28.7)	-1.5 (-2.8,-0.2)
	Female	25.5 (20.4,31.2)	25.1 (20.6,30.2)	24.9 (20.8,29.4)	23.4 (19.6,27.4)	23.3 (19.7,27.1)	22.9 (19.8,26.2)	20.9 (18.3,23.8)	20.7 (18.3,23.3)	21.4 (19.2,23.7)	21.6 (19.4,24.1)	22.1 (19.6,24.8)	22.1 (18.9,25.5)	22.1 (18.5,26.0)	20.4 (15.9,24.9)	20.2 (15.7,24.6)	20.2 (16.5,24.0)	19.5 (16.0,23.2)	-1.7 (-3.5,0.2)
	Both	28.3 (23.9,33.2)	27.8 (23.7,32.2)	27.5 (23.6,31.6)	25.8 (22.0,29.6)	25.5 (21.9,29.3)	25.5 (22.0,29.1)	24.3 (21.4,27.5)	24.8 (22.0,27.8)	25.0 (22.4,27.7)	25.0 (22.4,27.9)	25.0 (22.5,27.8)	24.3 (21.4,27.3)	24.2 (21.1,27.6)	22.9 (19.6,26.5)	22.6 (19.1,26.2)	22.9 (19.2,26.7)	22.1 (18.6,25.9)	-1.6 (-3.1,-0.1)
Monroe County, AR	Male	27.7 (23.7,32.1)	27.2 (23.2,31.5)	27.0 (23.1,31.3)	26.6 (22.8,30.9)	26.4 (22.4,30.6)	27.0 (22.9,31.2)	26.2 (22.8,29.6)	26.5 (23.1,29.8)	26.0 (22.9,29.2)	25.2 (21.7,28.8)	23.6 (20.5,26.7)	23.3 (20.1,26.4)	24.3 (21.2,27.7)	23.0 (19.2,27.0)	23.0 (17.9,28.3)	24.2 (20.1,28.5)	23.2 (19.3,27.4)	-1.1 (-2.6,0.3)
	Female	22.1 (17.0,28.2)	22.0 (17.2,27.3)	21.9 (17.6,26.7)	22.6 (18.4,27.3)	22.9 (18.8,27.5)	22.5 (18.9,26.4)	21.1 (17.8,24.6)	20.2 (17.3,23.5)	19.1 (16.6,22.0)	18.9 (16.5,21.5)	19.3 (16.7,22.1)	19.0 (15.9,22.5)	19.3 (15.7,23.2)	18.9 (14.6,23.6)	18.5 (14.3,23.0)	17.9 (14.1,22.3)	17.3 (13.7,21.6)	-1.5 (-3.6,0.6)
	Both	24.9 (20.3,30.1)	24.6 (20.5,29.3)	24.4 (20.4,28.8)	24.6 (20.6,29.1)	24.6 (20.5,29.0)	24.7 (20.9,28.7)	23.6 (20.3,27.0)	23.3 (20.2,26.6)	22.5 (19.6,25.5)	22.0 (19.2,25.0)	21.4 (18.8,24.2)	21.1 (18.2,24.1)	21.8 (18.7,25.3)	20.9 (17.5,24.7)	20.7 (17.1,24.7)	21.0 (17.1,25.3)	20.2 (16.5,24.5)	-1.3 (-3.0,0.4)
Montgomery County, AR	Male	28.3 (24.1,32.7)	27.7 (23.6,32.0)	27.3 (23.3,31.6)	26.9 (22.9,31.2)	26.0 (22.0,30.3)	25.7 (21.6,29.9)	25.0 (21.7,28.6)	24.8 (21.5,28.2)	24.5 (21.6,27.7)	24.2 (20.9,27.8)	23.4 (20.5,26.7)	23.3 (20.2,26.6)	23.8 (20.8,27.2)	23.2 (19.7,27.1)	22.7 (17.7,27.8)	22.9 (18.9,27.2)	22.0 (18.1,26.2)	-1.6 (-3.0,0.0)
	Female	24.9 (19.1,31.0)	24.7 (19.4,30.2)	24.6 (19.8,29.9)	25.0 (20.3,30.2)	25.3 (20.7,30.2)	24.9 (20.7,29.3)	25.7 (21.7,30.1)	25.2 (21.6,29.0)	23.5 (20.7,26.8)	22.1 (19.4,25.2)	21.5 (18.7,24.7)	20.2 (16.9,24.0)	20.0 (16.3,24.5)	20.5 (15.9,25.8)	21.6 (16.8,27.2)	21.7 (17.1,26.8)	21.0 (16.6,25.9)	-1.1 (-3.0,1.0)
	Both	26.5 (21.6,31.7)	26.1 (21.5,31.0)	25.9 (21.6,30.7)	25.9 (21.5,30.7)	25.7 (21.4,30.2)	25.3 (21.2,29.6)	25.4 (21.7,29.3)	25.0 (21.6,28.6)	24.0 (21.2,27.3)	23.2 (20.4,26.3)	22.4 (19.7,25.6)	21.7 (18.8,25.0)	21.9 (18.7,25.5)	21.8 (18.2,25.9)	22.1 (18.3,26.4)	22.3 (18.0,27.0)	21.5 (17.4,26.1)	-1.3 (-3.0,0.4)
Nevada County, AR	Male	28.2 (24.3,32.6)	27.6 (23.7,31.9)	27.2 (23.4,31.6)	27.3 (23.4,31.6)	26.3 (22.3,30.6)	26.7 (22.6,31.2)	26.2 (22.6,29.9)	26.7 (23.2,30.3)	26.7 (23.3,29.9)	26.3 (22.6,30.0)	25.4 (22.2,28.7)	25.0 (21.7,28.4)	25.0 (21.6,28.5)	23.8 (20.0,27.7)	23.2 (18.0,28.2)	23.2 (19.2,27.6)	22.3 (18.4,26.5)	-1.5 (-3.0,0.1)
	Female	19.6 (15.1,25.3)	19.5 (15.5,24.5)	19.5 (15.6,24.0)	19.1 (15.4,23.5)	19.7 (15.9,23.9)	19.7 (16.2,23.4)	18.6 (15.5,21.9)	18.4 (15.6,21.4)	18.1 (15.6,20.8)	18.4 (15.9,21.0)	18.3 (15.7,21.2)	18.2 (15.0,21.7)	19.4 (15.8,23.4)	20.2 (15.7,25.1)	19.3 (15.0,24.1)	18.8 (14.7,23.5)	18.0 (14.2,22.5)	-0.5 (-2.6,1.6)
	Both	23.8 (19.7,28.7)	23.5 (19.6,28.1)	23.3 (19.4,27.7)	23.1 (19.3,27.4)	22.9 (19.1,27.2)	23.1 (19.5,27.1)	22.3 (19.0,25.8)	22.5 (19.3,25.7)	22.3 (19.4,25.3)	22.3 (19.4,25.2)	21.8 (18.9,24.8)	21.6 (18.6,24.7)	22.2 (18.9,25.6)	21.9 (18.5,25.7)	21.2 (17.5,25.4)	21.0 (17.0,25.5)	20.1 (16.3,24.5)	-1.1 (-2.7,0.7)
Newton County, AR	Male	26.8 (23.0,31.1)	26.2 (22.6,30.5)	25.9 (22.2,29.9)	25.2 (21.6,29.3)	25.0 (21.2,29.1)	25.3 (21.5,29.4)	24.4 (21.1,27.9)	25.0 (21.8,28.6)	25.0 (21.9,28.2)	24.1 (20.6,27.7)	24.0 (21.0,27.5)	23.8 (20.7,27.2)	23.1 (20.1,26.5)	22.5 (19.0,26.3)	22.3 (17.6,27.4)	21.6 (17.7,25.8)	20.7 (17.0,24.9)	-1.6 (-3.1,-0.2)
	Female	24.6 (19.2,31.0)	24.3 (19.3,30.2)	24.2 (19.6,29.5)	25.1 (20.6,30.2)	24.8 (20.6,29.4)	25.3 (21.2,29.8)	26.7 (22.6,31.1)	25.2 (21.6,28.9)	24.6 (21.5,28.0)	24.5 (21.5,27.6)	23.0 (20.1,26.3)	21.4 (18.1,25.3)	22.0 (18.1,26.4)	20.9 (16.2,26.2)	19.5 (14.9,24.8)	20.0 (15.7,25.0)	19.3 (15.3,24.1)	-1.5 (-3.5,0.6)
	Both	25.7 (21.0,31.1)	25.3 (21.0,30.3)	25.0 (21.0,29.8)	25.1 (21.2,29.8)	24.9 (20.9,29.2)	25.3 (21.4,29.5)	25.6 (21.9,29.5)	25.1 (21.7,28.6)	24.8 (21.7,28.1)	24.3 (21.2,27.6)	23.5 (20.6,26.7)	22.6 (19.7,25.9)	22.5 (19.3,26.2)	21.6 (18.2,25.8)	20.9 (17.0,25.0)	20.8 (16.7,25.4)	20.0 (16.1,24.5)	-1.6 (-3.2,0.2)
Ouachita County, AR	Male	26.0 (22.5,30.1)	25.4 (22.1,29.3)	25.1 (21.8,28.8)	25.1 (21.8,29.1)	24.1 (20.7,28.2)	24.4 (21.0,28.4)	24.7 (21.7,28.2)	26.0 (22.8,29.5)	26.2 (23.2,29.4)	26.3 (22.9,30.0)	25.8 (22.7,28.9)	25.6 (22.4,28.8)	25.7 (22.6,28.9)	24.3 (21.0,27.9)	23.2 (19.0,27.7)	22.5 (19.0,26.3)	21.6 (18.2,25.5)	-1.1 (-2.5,0.2)
	Female	19.4 (15.2,24.5)	19.3 (15.6,23.8)	19.2 (15.8,23.5)	19.8 (16.5,23.8)	20.0 (16.8,23.8)	19.7 (16.7,23.2)	18.6 (16.0,21.7)	18.5 (16.2,21.3)	18.7 (16.6,21.1)	18.6 (16.4,20.9)	18.8 (16.5,21.4)	19.0 (16.2,22.3)	18.7 (15.4,22.4)	18.6 (14.6,23.0)	17.3 (13.2,21.6)	18.5 (15.0,22.4)	17.9 (14.5,21.7)	-0.5 (-2.4,1.4)
	Both	22.6 (18.9,27.2)	22.3 (18.8,26.5)	22.1 (18.8,26.1)	22.4 (19.1,26.3)	22.0 (18.8,25.9)	22.0 (18.9,25.8)	21.6 (18.8,24.9)	22.2 (19.5,25.2)	22.4 (19.9,25.2)	22.4 (19.8,25.1)	22.2 (19.7,25.0)	22.3 (19.5,25.2)	22.1 (19.2,25.4)	21.4 (18.3,24.9)	20.2 (16.9,23.8)	20.5 (16.9,24.4)	19.7 (16.3,23.6)	-0.9 (-2.5,0.7)
Perry County, AR	Male	29.2 (25.4,33.3)	28.6 (24.8,32.6)	28.3 (24.6,32.2)	27.4 (23.6,31.3)	27.1 (23.3,31.3)	27.9 (24.0,32.0)	26.5 (23.2,30.0)	26.3 (23.1,29.8)	25.5 (22.6,28.7)	24.8 (21.5,28.3)	24.5 (21.5,27.7)	24.2 (21.2,27.6)	24.6 (21.4,28.3)	24.2 (20.6,28.1)	25.0 (20.0,30.2)	24.5 (20.6,28.9)	23.5 (19.7,27.8)	-1.4 (-2.7,0.1)
	Female	22.9 (17.7,28.6)	22.7 (18.1,27.8)	22.6 (18.4,27.2)	23.8 (19.5,28.3)	24.1 (20.2,28.5)	23.2 (19.7,27.4)	23.8 (20.4,27.5)	23.7 (20.6,27.2)	22.4 (19.7,25.4)	22.7 (19.9,26.0)	23.2 (20.3,26.7)	23.2 (19.4,27.5)	23.1 (18.8,28.0)	23.3 (18.2,29.3)	23.3 (18.1,29.3)	23.4 (19.0,28.6)	22.7 (18.4,27.6)	-0.1 (-2.0,2.0)
	Both	26.0 (21.5,30.8)	25.6 (21.6,30.0)	25.4 (21.4,29.6)	25.6 (21.5,29.8)	25.6 (21.7,29.8)	25.5 (21.9,29.6)	25.1 (21.8,28.8)	25.0 (22.0,28.3)	23.9 (21.2,27.0)	23.7 (21.0,26.8)	23.8 (21.0,27.2)	23.7 (20.5,27.3)	23.9 (20.3,28.0)	23.8 (19.8,28.2)	24.2 (20.3,28.8)	24.0 (19.8,28.8)	23.1 (19.1,27.7)	-0.7 (-2.4,0.9)
Phillips County, AR	Male	27.5 (23.5,31.9)	27.0 (23.2,31.3)	26.9 (23.2,30.8)	26.4 (22.6,30.3)	26.0 (22.2,30.1)	26.7 (22.9,30.8)	26.5 (23.1,29.9)	26.3 (23.0,29.6)	26.9 (23.7,30.1)	27.2 (23.6,31.0)	25.6 (22.5,28.7)	25.4 (22.1,28.6)	26.0 (22.6,29.2)	25.2 (21.6,28.9)	25.3 (20.5,30.3)	25.0 (20.8,29.2)	24.2 (19.9,28.3)	-0.8 (-2.4,0.6)
	Female	21.3 (16.8,26.6)	20.8 (16.7,25.5)	20.5 (16.7,24.8)	21.3 (17.5,25.5)	20.9 (17.4,24.8)	20.4 (17.2,23.9)	19.9 (16.9,23.1)	19.9 (17.3,22.8)	19.2 (16.6,21.7)	19.4 (16.9,21.8)	18.0 (15.6,20.5)	18.1 (15.2,21.1)	16.9 (13.5,20.3)	16.7 (12.5,20.8)	16.0 (11.7,20.1)	17.0 (13.5,20.7)	16.3 (12.9,19.9)	-1.6 (-3.8,0.4)
	Both	24.3 (20.1,29.0)	23.9 (20.0,28.1)	23.6 (19.8,27.8)	23.8 (20.0,27.9)	23.4 (19.9,27.4)	23.5 (20.0,27.3)	23.1 (20.0,26.4)	23.0 (20.0,26.1)	23.0 (20.2,25.9)	23.2 (20.3,26.2)	21.8 (19.0,24.4)	21.7 (18.8,24.5)	21.4 (18.3,24.5)	20.9 (17.5,24.4)	20.5 (17.1,24.1)	20.9 (17.1,24.9)	20.2 (16.3,24.0)	-1.2 (-3.0,0.5)
Pike County, AR	Male	27.5 (23.6,31.3)	26.8 (23.1,30.6)	26.5 (22.6,30.4)	26.1 (22.2,29.9)	24.9 (20.9,28.6)	24.5 (20.7,28.4)	23.9 (20.6,27.1)	24.3 (21.2,27.7)	24.6 (21.6,27.8)	24.6 (21.3,28.3)	24.0 (20.9,27.3)	23.9 (20.7,27.4)	23.8 (20.8,27.3)	22.4 (18.9,26.3)	21.6 (17.0,26.6)	21.6 (17.9,25.7)	20.8 (17.2,25.0)	-1.7 (-3.2,-0.2)
	Female	22.0 (16.7,27.4)	21.9 (17.2,26.5)	21.8 (17.5,26.2)	21.2 (17.2,25.5)	22.1 (18.1,26.4)	22.6 (18.7,26.4)	22.7 (19.1,26.4)	22.9 (19.6,26.2)	22.3 (19.4,25.3)	21.6 (18.9,24.7)	21.8 (19.1,25.0)	20.4 (17.2,24.3)	20.4 (16.8,24.7)	22.2 (17.8,27.5)	21.4 (16.9,26.6)	20.3 (16.2,25.3)	19.6 (15.6,24.5)	-0.7 (-2.6,1.4)
	Both	24.7 (20.3,29.0)	24.3 (20.2,28.5)	24.1 (20.2,28.2)	23.6 (19.7,27.6)	23.5 (19.4,27.5)	23.5 (19.8,27.3)	23.3 (19.8,26.8)	23.6 (20.4,27.0)	23.5 (20.5,26.5)	23.1 (20.1,26.1)	22.9 (20.0,26.2)	22.1 (19.2,25.4)	22.1 (18.9,25.8)	22.3 (18.9,26.4)	21.5 (17.8,25.7)	20.9 (17.0,25.4)	20.2 (16.4,24.7)	-1.3 (-2.9,0.5)
Poinsett County, AR	Male	34.6 (30.4,39.4)	34.1 (30.0,38.7)	33.8 (29.7,38.5)	32.4 (28.5,37.1)	32.6 (28.5,37.1)	34.0 (29.8,38.8)	31.8 (28.4,35.9)	31.5 (28.2,35.3)	30.7 (27.6,34.1)	29.4 (25.9,33.3)	27.4 (24.2,30.9)	26.0 (22.8,29.6)	25.8 (22.6,29.3)	25.9 (22.3,30.1)	25.9 (21.0,31.2)	27.1 (23.2,31.6)	26.1 (22.3,30.6)	-1.8 (-3.0,-0.4)
	Female	28.7 (23.3,35.1)	28.6 (23.6,34.2)	28.5 (24.0,34.0)	27.8 (23.5,33.0)	28.2 (24.1,33.1)	29.7 (25.9,34.0)	27.9 (24.4,31.8)	27.8 (24.7,31.2)	27.2 (24.3,30.4)	28.1 (25.3,31.3)	26.4 (23.6,29.6)	27.1 (23.5,31.2)	27.9 (23.8,32.6)	27.4 (22.3,33.1)	25.5 (20.6,31.0)	24.4 (20.2,29.4)	23.5 (19.5,28.4)	-1.2 (-3.0,0.6)
	Both	31.6 (26.8,37.0)	31.3 (26.9,36.5)	31.1 (26.9,36.0)	30.1 (26.0,35.0)	30.4 (26.2,35.1)	31.8 (27.9,36.2)	29.8 (26.4,33.7)	29.6 (26.4,33.1)	28.9 (25.9,32.1)	28.8 (25.7,32.1)	26.9 (23.9,30.1)	26.6 (23.4,30.0)	26.9 (23.4,30.8)	26.7 (22.8,30.8)	25.7 (21.8,30.0)	25.8 (21.6,30.5)	24.8 (20.8,29.5)	-1.5 (-3.0,0.0)
Polk County, AR	Male	27.7 (24.2,31.7)	27.0 (23.7,30.9)	26.7 (23.4,30.6)	26.0 (22.6,29.8)	25.4 (22.1,29.3)	25.2 (21.9,29.1)	23.9 (21.2,27.1)	24.4 (21.6,27.5)	24.8 (22.1,27.8)	25.3 (22.2,28.6)	24.5 (21.8,27.5)	24.4 (21.6,27.6)	24.3 (21.4,27.6)	23.4 (20.2,27.1)	22.0 (17.7,27.0)	22.2 (18.6,26.1)	21.4 (17.8,25.3)	-1.6 (-3.0,-0.3)
	Female	22.6 (18.0,28.6)	22.5 (18.4,27.6)	22.4 (18.6,26.9)	22.3 (18.7,26.5)	23.5 (19.9,27.5)	24.1 (21.0,27.9)	24.8 (21.7,28.5)	25.1 (22.2,28.4)	24.4 (21.7,27.1)	23.8 (21.2,26.6)	23.0 (20.3,25.9)	22.1 (18.6,25.6)	22.3 (18.4,26.4)	23.8 (19.1,28.7)	21.5 (16.9,26.5)	21.8 (17.6,26.3)	21.0 (17.0,25.4)	-0.5 (-2.4,1.4)
	Both	25.1 (21.2,29.9)	24.7 (21.1,29.1)	24.5 (21.0,28.7)	24.1 (20.7,28.2)	24.4 (21.1,28.3)	24.6 (21.5,28.3)	24.4 (21.5,27.7)	24.8 (22.0,28.0)	24.6 (21.9,27.4)	24.5 (21.9,27.4)	23.7 (21.1,26.7)	23.2 (20.4,26.3)	23.3 (20.1,26.6)	23.6 (20.1,27.4)	21.8 (18.2,25.6)	22.0 (18.1,26.2)	21.2 (17.4,25.3)	-1.1 (-2.7,0.5)
Pope County, AR	Male	24.7 (21.5,28.2)	24.0 (20.9,27.5)	23.6 (20.4,27.3)	22.9 (19.8,26.5)	23.3 (19.9,27.0)	24.0 (20.8,27.8)	23.2 (20.4,26.3)	23.2 (20.6,26.1)	23.0 (20.6,25.6)	22.2 (19.5,25.2)	21.8 (19.5,24.4)	21.8 (19.4,24.5)	21.3 (18.9,24.0)	20.9 (18.1,24.1)	20.0 (16.1,24.1)	19.9 (16.8,23.4)	19.0 (15.9,22.4)	-1.7 (-3.0,-0.2)
	Female	22.3 (18.4,27.0)	22.1 (18.5,26.2)	21.9 (18.6,25.6)	21.8 (18.6,25.4)	21.6 (18.4,25.4)	23.6 (20.4,27.0)	23.3 (20.5,26.4)	23.3 (20.8,26.0)	22.4 (20.2,24.8)	21.6 (19.6,23.8)	20.2 (18.1,22.4)	18.7 (16.0,21.8)	18.2 (15.2,21.6)	18.0 (14.3,22.2)	17.4 (13.6,21.6)	18.0 (14.7,21.7)	17.4 (14.2,21.0)	-1.6 (-3.2,0.2)
	Both	23.5 (20.0,27.5)	23.0 (19.7,26.6)	22.7 (19.6,26.3)	22.3 (19.2,25.9)	22.4 (19.2,26.2)	23.8 (20.5,27.4)	23.3 (20.5,26.3)	23.3 (20.7,26.0)	22.7 (20.4,25.2)	21.9 (19.7,24.3)	21.0 (18.9,23.3)	20.2 (18.0,22.7)	19.7 (17.2,22.7)	19.4 (16.7,22.7)	18.7 (15.8,22.0)	18.9 (15.7,22.5)	18.1 (15.1,21.7)	-1.6 (-3.1,0.0)
Prairie County, AR	Male	26.3 (22.6,30.3)	25.7 (22.1,29.5)	25.4 (21.9,29.2)	25.2 (21.6,29.0)	24.7 (21.2,28.6)	25.7 (21.9,29.6)	25.7 (22.5,29.2)	26.7 (23.6,30.3)	26.5 (23.5,29.8)	26.5 (23.1,30.4)	25.7 (22.5,29.2)	25.3 (21.9,28.9)	23.3 (19.9,26.7)	22.6 (18.8,26.5)	21.5 (16.8,26.9)	23.2 (19.2,27.3)	22.3 (18.3,26.4)	-1.0 (-2.5,0.4)
	Female	21.7 (16.8,27.2)	21.6 (17.2,26.7)	21.6 (17.5,26.3)	21.7 (17.8,26.2)	21.6 (17.9,25.8)	21.9 (18.5,25.9)	21.6 (18.4,25.3)	20.5 (17.6,23.7)	20.0 (17.4,22.9)	20.7 (18.0,23.7)	20.9 (18.0,24.0)	20.0 (16.6,23.5)	21.6 (17.8,25.6)	21.2 (16.4,26.3)	20.0 (15.2,24.9)	20.0 (15.7,24.5)	19.4 (15.2,23.9)	-0.7 (-2.8,1.3)
	Both	24.0 (19.8,28.7)	23.6 (19.7,28.0)	23.4 (19.8,27.5)	23.4 (19.6,27.5)	23.1 (19.5,27.1)	23.7 (20.3,27.7)	23.6 (20.4,27.3)	23.6 (20.5,27.0)	23.2 (20.4,26.3)	23.5 (20.6,26.8)	23.3 (20.3,26.6)	22.6 (19.5,25.8)	22.4 (19.0,25.9)	21.9 (18.3,25.8)	20.8 (16.9,24.7)	21.6 (17.4,25.9)	20.8 (16.7,25.1)	-0.9 (-2.7,0.8)
Pulaski County, AR	Male	25.5 (23.1,28.5)	25.0 (22.7,27.6)	24.6 (22.4,27.2)	23.4 (21.3,25.8)	22.8 (20.7,25.2)	23.0 (20.9,25.4)	21.9 (20.0,24.0)	21.1 (19.3,23.0)	20.5 (18.8,22.1)	20.3 (18.5,22.2)	19.2 (17.5,20.6)	18.0 (16.4,19.6)	18.3 (16.5,20.1)	17.6 (15.6,19.7)	17.0 (14.1,19.8)	17.1 (14.8,19.6)	16.4 (14.2,19.0)	-2.8 (-3.9,-1.6)
	Female	20.3 (17.7,23.6)	19.8 (17.7,22.5)	19.3 (17.5,21.7)	18.3 (16.5,20.5)	18.2 (16.5,20.2)	17.2 (15.6,18.8)	17.0 (15.6,18.4)	17.0 (15.7,18.1)	16.2 (15.1,17.2)	15.8 (14.7,16.9)	15.6 (14.4,17.0)	15.0 (13.3,16.9)	14.8 (12.9,16.9)	14.8 (12.4,17.3)	14.0 (11.6,16.5)	14.0 (12.0,16.1)	13.4 (11.5,15.5)	-2.6 (-3.9,-1.3)
	Both	22.9 (20.5,26.0)	22.3 (20.2,25.0)	21.9 (19.9,24.3)	20.8 (18.9,23.1)	20.4 (18.6,22.6)	20.0 (18.2,22.0)	19.4 (17.8,21.1)	19.0 (17.4,20.5)	18.3 (16.9,19.6)	18.0 (16.6,19.2)	17.3 (16.0,18.7)	16.5 (15.0,18.1)	16.5 (14.8,18.4)	16.2 (14.3,18.3)	15.5 (13.5,17.6)	15.5 (13.4,17.8)	14.9 (12.9,17.2)	-2.7 (-3.9,-1.5)
Randolph County, AR	Male	29.7 (26.0,33.6)	29.0 (25.4,32.9)	28.7 (25.1,32.6)	28.9 (25.2,32.9)	28.5 (24.8,32.8)	29.6 (25.7,33.7)	29.1 (25.7,32.7)	29.2 (26.0,32.9)	28.4 (25.5,31.9)	28.1 (24.9,32.0)	27.1 (24.1,30.5)	26.2 (23.2,29.9)	24.8 (21.8,28.6)	23.1 (19.7,27.4)	22.2 (17.6,27.4)	23.8 (20.2,28.4)	22.8 (19.4,27.4)	-1.6 (-3.0,-0.2)
	Female	24.6 (19.6,29.6)	24.4 (19.9,29.0)	24.3 (20.2,28.6)	24.6 (20.6,28.9)	22.7 (19.1,26.7)	23.2 (20.1,27.0)	24.7 (21.5,28.4)	24.3 (21.4,27.7)	25.0 (22.3,28.4)	24.9 (22.2,28.1)	25.7 (22.9,29.3)	24.4 (21.0,28.6)	23.6 (19.9,28.3)	21.8 (17.2,27.2)	22.2 (17.7,27.8)	21.6 (17.7,26.9)	20.9 (17.1,25.9)	-1.0 (-2.8,1.0)
	Both	27.1 (22.8,31.4)	26.7 (22.7,30.7)	26.5 (22.7,30.5)	26.7 (22.9,30.9)	25.6 (21.9,29.6)	26.4 (22.8,30.2)	26.8 (23.6,30.6)	26.7 (23.7,30.3)	26.7 (23.9,30.1)	26.5 (23.7,29.7)	26.4 (23.5,29.8)	25.3 (22.3,29.1)	24.2 (20.8,28.4)	22.4 (19.1,26.9)	22.2 (18.7,26.9)	22.6 (18.9,27.7)	21.9 (18.2,26.7)	-1.3 (-2.9,0.3)
Saline County, AR	Male	27.7 (24.1,31.3)	27.0 (23.5,30.6)	26.6 (23.1,30.1)	25.9 (22.4,29.3)	25.6 (22.2,29.0)	26.4 (22.8,29.9)	25.9 (22.8,28.9)	25.1 (22.4,28.0)	24.4 (22.0,27.1)	24.1 (21.3,26.9)	23.0 (20.6,25.6)	22.6 (20.1,25.2)	22.3 (19.7,25.0)	21.8 (18.7,25.1)	21.9 (17.5,26.1)	21.7 (18.4,25.4)	20.8 (17.5,24.5)	-1.8 (-3.2,-0.5)
	Female	25.2 (20.6,30.3)	24.8 (20.8,29.2)	24.5 (20.7,28.3)	24.1 (20.6,27.7)	23.1 (19.8,26.5)	20.8 (18.1,23.6)	21.4 (18.9,23.9)	20.8 (18.8,23.1)	18.7 (16.9,20.6)	19.2 (17.3,21.3)	19.7 (17.5,21.9)	18.3 (15.4,21.3)	17.8 (14.5,21.2)	19.1 (15.0,23.2)	18.8 (14.8,23.0)	19.9 (16.4,23.8)	19.2 (15.8,22.9)	-1.7 (-3.5,-0.1)
	Both	26.5 (22.5,30.8)	25.9 (22.3,29.7)	25.5 (22.0,29.1)	25.0 (21.5,28.5)	24.3 (21.0,27.6)	23.5 (20.5,26.6)	23.6 (20.9,26.4)	23.0 (20.6,25.4)	21.5 (19.5,23.7)	21.6 (19.6,23.9)	21.3 (19.1,23.6)	20.4 (18.0,23.0)	20.0 (17.3,23.0)	20.5 (17.4,23.8)	20.3 (17.1,23.8)	20.8 (17.4,24.5)	20.0 (16.6,23.7)	-1.8 (-3.3,-0.3)
Scott County, AR	Male	30.4 (25.9,34.8)	29.6 (25.3,33.9)	29.2 (25.1,33.4)	28.4 (24.3,32.6)	27.3 (23.2,31.4)	27.7 (23.6,32.0)	26.8 (23.2,30.4)	27.1 (23.7,30.8)	26.1 (23.0,29.6)	26.8 (23.2,30.7)	25.5 (22.4,28.9)	24.7 (21.6,28.1)	24.8 (21.6,28.2)	25.0 (21.3,29.1)	23.2 (18.2,28.6)	23.9 (20.1,28.1)	23.0 (19.3,27.1)	-1.7 (-3.1,-0.4)
	Female	26.1 (20.2,32.7)	25.8 (20.4,31.8)	25.5 (20.7,31.0)	25.6 (20.9,30.5)	27.1 (22.3,32.0)	26.3 (22.2,30.6)	26.8 (22.8,30.9)	27.0 (23.5,30.8)	26.7 (23.6,30.2)	24.7 (21.9,27.7)	24.4 (21.4,27.5)	24.0 (20.3,27.9)	24.4 (20.3,28.9)	23.3 (18.1,28.8)	23.3 (18.4,28.7)	23.6 (19.1,28.6)	22.9 (18.7,27.8)	-0.8 (-2.7,1.1)
	Both	28.2 (23.1,33.7)	27.7 (23.0,32.8)	27.3 (22.9,31.9)	27.0 (22.5,31.6)	27.2 (22.9,31.6)	27.0 (23.0,31.3)	26.8 (23.0,30.7)	27.1 (23.8,30.8)	26.4 (23.4,29.8)	25.7 (22.8,29.2)	24.9 (22.0,28.1)	24.3 (21.3,27.5)	24.6 (21.2,28.2)	24.1 (20.4,28.1)	23.2 (19.3,27.5)	23.7 (19.5,28.3)	22.9 (19.0,27.5)	-1.3 (-2.9,0.3)
Searcy County, AR	Male	28.3 (24.4,32.6)	27.8 (23.9,32.0)	27.5 (23.7,31.6)	27.1 (23.3,31.2)	27.3 (23.4,31.5)	27.8 (23.7,32.3)	27.6 (24.2,31.3)	27.5 (24.2,31.0)	27.0 (23.9,30.4)	26.5 (23.0,30.3)	26.4 (23.2,30.0)	25.8 (22.5,29.4)	25.8 (22.5,29.7)	27.8 (23.9,32.2)	26.3 (21.5,31.9)	25.7 (21.6,30.3)	24.6 (20.6,29.1)	-0.9 (-2.3,0.5)
	Female	26.4 (20.8,32.7)	26.2 (21.1,32.0)	26.1 (21.3,31.3)	26.5 (21.9,31.6)	25.9 (21.5,30.9)	26.1 (22.1,30.5)	25.8 (22.0,29.8)	24.5 (21.1,28.1)	23.9 (21.0,27.2)	23.6 (20.8,26.7)	23.3 (20.4,26.5)	22.5 (19.0,26.3)	21.9 (17.9,26.2)	21.9 (16.9,27.1)	19.8 (15.1,24.8)	20.9 (16.6,25.8)	20.3 (16.1,24.9)	-1.7 (-3.7,0.3)
	Both	27.4 (22.7,32.7)	27.0 (22.6,31.9)	26.8 (22.5,31.4)	26.8 (22.5,31.4)	26.6 (22.4,31.2)	26.9 (23.0,31.2)	26.7 (23.1,30.5)	26.0 (22.7,29.5)	25.4 (22.4,28.8)	25.0 (22.0,28.4)	24.8 (21.8,28.1)	24.1 (21.1,27.6)	23.8 (20.4,27.5)	24.8 (21.1,28.9)	23.0 (19.3,27.5)	23.3 (19.1,28.1)	22.4 (18.3,27.0)	-1.2 (-2.9,0.4)
Sebastian County, AR	Male	28.6 (25.2,31.9)	27.9 (24.7,31.1)	27.4 (24.1,30.8)	26.5 (23.3,29.8)	25.1 (21.9,28.3)	25.6 (22.5,28.7)	24.0 (21.3,26.9)	24.8 (22.2,27.7)	23.1 (20.9,25.8)	24.0 (21.3,27.0)	24.1 (21.6,26.8)	23.5 (20.9,26.4)	22.5 (19.9,25.6)	22.9 (19.8,26.3)	22.2 (18.0,26.5)	22.6 (19.2,26.6)	21.7 (18.4,25.6)	-1.7 (-3.0,-0.4)
	Female	22.0 (18.1,26.2)	21.7 (18.3,25.4)	21.5 (18.4,24.7)	21.5 (18.5,24.6)	22.1 (19.1,25.2)	22.1 (19.6,24.9)	21.6 (19.4,24.2)	22.3 (20.2,24.6)	22.3 (20.4,24.4)	20.7 (18.8,22.9)	20.3 (18.0,22.9)	19.7 (16.8,22.9)	20.2 (16.8,23.8)	20.4 (16.4,24.9)	20.5 (16.4,25.1)	21.2 (17.6,25.7)	20.5 (16.9,24.6)	-0.4 (-2.0,1.3)
	Both	25.2 (21.7,28.9)	24.7 (21.5,28.1)	24.4 (21.3,27.6)	23.9 (20.8,27.2)	23.6 (20.5,26.7)	23.8 (21.0,26.8)	22.8 (20.3,25.5)	23.5 (21.2,26.1)	22.7 (20.6,25.0)	22.3 (20.2,24.7)	22.1 (19.9,24.7)	21.6 (19.2,24.5)	21.3 (18.6,24.5)	21.6 (18.7,25.2)	21.4 (18.2,25.1)	21.9 (18.4,26.1)	21.1 (17.6,25.1)	-1.1 (-2.5,0.3)
Sevier County, AR	Male	28.2 (24.1,32.3)	27.3 (23.5,31.4)	26.7 (22.8,30.8)	26.2 (22.4,30.2)	25.3 (21.6,29.5)	25.1 (21.1,29.3)	24.0 (20.6,27.5)	24.4 (21.2,27.7)	24.0 (21.1,27.1)	23.8 (20.4,27.4)	23.6 (20.7,26.7)	23.9 (21.0,27.1)	24.5 (21.7,27.8)	23.3 (20.1,27.0)	22.7 (18.5,27.1)	21.6 (18.1,25.6)	20.6 (17.3,24.5)	-1.9 (-3.4,-0.5)
	Female	25.0 (19.4,30.8)	24.5 (19.4,29.7)	24.0 (19.4,28.9)	24.2 (19.8,28.8)	24.1 (19.8,28.8)	23.8 (20.1,27.9)	22.2 (18.8,25.8)	21.9 (18.9,25.2)	21.3 (18.6,24.2)	21.2 (18.8,24.1)	20.3 (17.8,23.2)	19.5 (16.4,23.1)	19.3 (15.8,23.2)	19.0 (14.6,23.7)	18.2 (13.9,23.1)	19.4 (15.8,23.7)	18.5 (15.1,22.7)	-1.9 (-3.8,0.2)
	Both	26.6 (21.7,31.4)	25.9 (21.5,30.6)	25.3 (21.2,29.8)	25.2 (21.1,29.5)	24.7 (20.7,29.1)	24.4 (20.6,28.5)	23.1 (19.7,26.6)	23.1 (20.1,26.3)	22.6 (19.8,25.6)	22.5 (19.7,25.4)	21.9 (19.4,24.9)	21.7 (19.0,24.8)	21.9 (18.9,25.4)	21.1 (17.9,24.9)	20.4 (17.2,24.4)	20.5 (16.9,24.6)	19.6 (16.2,23.6)	-1.9 (-3.6,-0.2)
Sharp County, AR	Male	29.2 (25.3,33.1)	28.5 (24.7,32.5)	28.1 (24.5,32.1)	27.8 (24.1,31.7)	26.8 (23.1,30.9)	27.3 (23.5,31.5)	26.3 (23.0,29.9)	26.6 (23.4,30.1)	26.4 (23.4,29.7)	27.0 (23.6,30.7)	27.4 (24.1,30.7)	27.1 (23.7,30.4)	25.1 (21.8,28.4)	23.9 (20.2,27.8)	23.3 (18.3,28.2)	23.8 (20.1,28.0)	22.9 (19.2,27.0)	-1.5 (-2.9,-0.2)
	Female	26.2 (21.0,31.9)	25.9 (21.2,31.0)	25.7 (21.2,30.3)	25.4 (21.1,30.1)	24.0 (20.0,28.6)	24.3 (20.6,28.6)	24.9 (21.4,29.0)	24.8 (21.6,28.3)	25.3 (22.3,28.4)	25.9 (22.9,28.8)	26.7 (23.6,30.0)	25.4 (21.8,29.2)	24.2 (20.2,28.4)	23.0 (18.1,28.1)	23.2 (18.5,28.2)	22.4 (18.1,27.2)	21.6 (17.6,26.3)	-1.2 (-3.0,0.7)
	Both	27.6 (23.2,32.3)	27.2 (22.9,31.5)	26.9 (22.8,31.4)	26.5 (22.6,30.7)	25.4 (21.6,29.7)	25.8 (22.1,29.9)	25.6 (22.3,29.4)	25.7 (22.6,29.1)	25.8 (22.9,29.2)	26.4 (23.4,29.6)	27.1 (23.9,30.2)	26.2 (22.9,29.6)	24.6 (21.2,28.3)	23.4 (19.8,27.3)	23.2 (19.5,27.4)	23.1 (19.0,27.6)	22.3 (18.4,26.7)	-1.4 (-3.0,0.2)
St. Francis County, AR	Male	27.8 (24.3,32.4)	27.2 (23.8,31.6)	26.8 (23.3,31.1)	25.6 (22.3,29.9)	25.5 (22.1,29.9)	27.3 (23.8,31.8)	26.0 (23.0,29.8)	26.7 (23.7,30.4)	26.4 (23.6,29.8)	26.4 (23.2,30.3)	24.9 (22.1,28.1)	25.1 (22.2,28.4)	25.5 (22.7,28.8)	24.9 (21.5,28.8)	23.3 (19.0,28.6)	23.8 (19.9,27.8)	22.9 (19.1,26.9)	-1.2 (-2.7,0.1)
	Female	21.0 (17.0,26.6)	20.8 (17.2,25.8)	20.7 (17.3,25.4)	20.4 (17.1,24.9)	21.7 (18.3,26.2)	22.1 (19.0,26.2)	21.1 (18.3,24.8)	20.9 (18.3,24.2)	20.8 (18.4,23.7)	20.0 (17.7,22.6)	21.3 (18.9,24.0)	21.4 (18.5,24.6)	21.1 (17.9,24.5)	21.1 (17.0,25.1)	19.3 (15.3,23.5)	16.9 (13.4,20.9)	16.3 (13.1,20.1)	-1.6 (-3.6,0.4)
	Both	24.4 (20.8,29.3)	23.9 (20.5,28.6)	23.7 (20.3,28.2)	23.0 (19.7,27.3)	23.6 (20.2,28.0)	24.6 (21.3,28.9)	23.5 (20.6,27.2)	23.7 (20.9,27.2)	23.5 (21.0,26.7)	23.1 (20.6,26.2)	23.1 (20.5,25.9)	23.2 (20.6,26.2)	23.3 (20.4,26.6)	22.9 (19.9,26.4)	21.3 (17.9,25.0)	20.3 (16.6,24.3)	19.6 (16.1,23.4)	-1.4 (-3.0,0.2)
Stone County, AR	Male	29.4 (25.6,33.3)	28.9 (25.2,32.6)	28.7 (24.9,32.4)	28.3 (24.5,32.1)	27.9 (24.0,31.8)	27.6 (23.6,31.6)	26.9 (23.5,30.3)	26.1 (23.0,29.3)	25.6 (22.8,28.5)	25.6 (22.3,29.0)	26.0 (23.0,29.1)	26.1 (22.9,29.4)	26.2 (22.8,29.6)	24.9 (21.3,28.8)	24.5 (19.9,29.4)	23.1 (19.2,27.4)	22.2 (18.4,26.5)	-1.8 (-3.3,-0.4)
	Female	25.0 (19.5,30.9)	24.8 (20.0,30.0)	24.7 (20.5,29.3)	24.6 (20.5,29.1)	24.3 (20.2,28.4)	24.1 (20.4,28.1)	24.4 (20.9,28.0)	24.8 (21.5,28.2)	23.7 (20.9,26.7)	23.8 (20.9,26.8)	23.2 (20.1,26.5)	22.4 (18.6,26.5)	20.3 (16.1,24.7)	20.4 (15.4,25.9)	20.7 (15.8,26.1)	22.0 (17.8,27.1)	21.4 (17.2,26.2)	-1.0 (-2.9,1.1)
	Both	27.2 (22.6,31.9)	26.8 (22.7,31.3)	26.7 (22.7,30.9)	26.4 (22.5,30.5)	26.1 (22.1,30.0)	25.8 (22.1,29.7)	25.6 (22.3,29.2)	25.4 (22.3,28.7)	24.6 (21.8,27.5)	24.7 (21.8,27.7)	24.6 (21.6,27.6)	24.2 (20.8,27.6)	23.2 (19.6,27.1)	22.6 (18.8,26.8)	22.5 (18.6,26.8)	22.5 (18.5,27.3)	21.8 (17.8,26.4)	-1.4 (-3.1,0.2)
Union County, AR	Male	26.2 (22.7,30.4)	25.6 (22.2,29.6)	25.3 (21.9,29.2)	25.6 (22.2,29.6)	25.1 (21.7,28.8)	25.0 (21.6,28.9)	24.4 (21.4,27.6)	25.6 (22.7,28.6)	25.5 (22.8,28.3)	25.7 (22.6,28.8)	25.2 (22.4,28.0)	24.7 (22.0,27.7)	24.3 (21.5,27.2)	23.1 (20.1,26.6)	22.6 (18.5,27.2)	22.4 (19.0,26.0)	21.6 (18.2,25.2)	-1.2 (-2.7,0.1)
	Female	20.5 (16.2,25.8)	20.3 (16.4,25.0)	20.1 (16.7,24.4)	20.5 (17.1,24.6)	20.3 (17.1,24.0)	20.6 (17.7,23.6)	20.4 (17.9,23.1)	20.6 (18.2,23.0)	19.9 (17.8,22.0)	19.6 (17.6,21.8)	18.8 (16.7,21.3)	18.5 (15.6,21.8)	18.0 (14.6,21.7)	18.6 (14.3,23.2)	18.5 (14.1,23.1)	19.7 (16.0,23.7)	19.0 (15.5,22.9)	-0.5 (-2.4,1.5)
	Both	23.3 (19.4,28.0)	22.9 (19.4,27.2)	22.7 (19.2,26.7)	23.0 (19.7,27.0)	22.6 (19.4,26.4)	22.8 (19.7,26.1)	22.4 (19.6,25.3)	23.1 (20.5,25.6)	22.6 (20.3,25.0)	22.6 (20.2,25.0)	22.0 (19.6,24.4)	21.6 (19.1,24.3)	21.1 (18.2,24.3)	20.8 (17.7,24.2)	20.5 (17.2,24.1)	21.0 (17.5,24.9)	20.3 (16.8,24.1)	-0.9 (-2.5,0.7)
Van Buren County, AR	Male	26.7 (23.2,30.7)	26.2 (22.6,30.0)	25.8 (22.2,29.7)	25.6 (22.1,29.6)	25.8 (22.1,29.8)	26.0 (22.2,30.0)	25.7 (22.4,29.1)	25.3 (22.3,28.8)	24.2 (21.4,27.1)	23.4 (20.3,26.7)	22.7 (20.0,25.7)	22.3 (19.5,25.4)	24.1 (21.1,27.4)	24.4 (21.1,28.0)	23.9 (19.5,28.7)	22.7 (19.4,26.7)	21.8 (18.5,25.6)	-1.3 (-2.6,0.0)
	Female	22.7 (18.1,28.9)	22.5 (18.4,27.8)	22.4 (18.6,27.0)	22.5 (18.6,27.0)	22.8 (18.9,27.2)	23.3 (19.8,27.1)	23.2 (20.0,26.8)	23.2 (20.1,26.2)	23.7 (21.0,26.5)	22.8 (20.3,25.5)	21.9 (19.3,24.7)	21.5 (18.2,25.1)	21.6 (17.9,25.6)	20.7 (16.0,25.4)	20.2 (15.6,25.0)	20.6 (16.9,25.0)	20.0 (16.4,24.3)	-0.8 (-2.7,1.1)
	Both	24.7 (20.8,29.7)	24.3 (20.6,28.7)	24.1 (20.4,28.2)	24.0 (20.3,28.3)	24.3 (20.4,28.5)	24.6 (20.9,28.5)	24.4 (21.3,27.9)	24.2 (21.3,27.4)	24.0 (21.2,26.8)	23.1 (20.5,25.9)	22.3 (19.7,25.0)	21.9 (19.2,25.0)	22.9 (19.7,26.2)	22.5 (19.2,26.1)	22.0 (18.6,25.9)	21.6 (18.2,25.8)	20.9 (17.5,24.9)	-1.0 (-2.7,0.5)
Washington County, AR	Male	27.0 (23.9,30.4)	26.3 (23.4,29.4)	25.8 (23.0,28.9)	24.2 (21.5,27.2)	24.6 (22.0,27.6)	22.7 (20.2,25.7)	20.6 (18.5,23.2)	21.0 (18.9,23.4)	20.9 (19.1,22.9)	19.6 (17.6,22.1)	19.2 (17.5,21.1)	19.2 (17.5,21.3)	19.1 (17.3,21.3)	18.3 (16.3,20.9)	17.2 (14.5,20.7)	16.9 (14.5,19.8)	16.1 (13.8,18.9)	-3.2 (-4.4,-1.8)
	Female	20.4 (16.8,24.7)	20.0 (16.9,23.6)	19.6 (16.8,22.7)	18.6 (16.1,21.4)	18.0 (15.7,20.7)	18.8 (16.9,21.1)	19.0 (17.2,21.1)	18.7 (17.1,20.4)	18.4 (17.0,20.0)	19.1 (17.5,20.7)	18.0 (16.3,19.8)	17.4 (15.2,19.8)	17.4 (15.0,20.1)	16.9 (14.0,20.3)	15.9 (12.8,19.3)	16.7 (14.2,19.7)	16.1 (13.8,18.9)	-1.5 (-3.0,0.2)
	Both	23.6 (20.4,27.3)	23.1 (20.1,26.4)	22.6 (19.9,25.7)	21.3 (18.8,24.3)	21.3 (18.9,24.0)	20.7 (18.6,23.4)	19.8 (17.9,22.1)	19.8 (18.0,21.8)	19.6 (18.1,21.4)	19.3 (17.8,21.2)	18.6 (17.0,20.4)	18.3 (16.5,20.3)	18.2 (16.2,20.5)	17.6 (15.5,20.1)	16.6 (14.3,19.3)	16.8 (14.4,19.8)	16.1 (13.8,18.9)	-2.4 (-3.7,-0.9)
White County, AR	Male	25.4 (22.2,29.1)	24.7 (21.7,28.3)	24.4 (21.4,28.0)	23.8 (20.9,27.3)	23.8 (20.9,27.6)	24.0 (21.0,27.8)	24.1 (21.5,27.4)	24.1 (21.7,27.2)	22.9 (20.6,25.6)	23.6 (21.0,26.6)	22.4 (20.0,25.2)	21.4 (18.9,24.2)	20.2 (17.6,23.0)	20.7 (17.7,23.9)	19.5 (15.3,23.7)	21.8 (18.5,25.6)	21.0 (17.6,24.7)	-1.2 (-2.6,0.2)
	Female	21.8 (17.8,26.7)	21.6 (18.0,25.8)	21.4 (18.2,25.3)	20.7 (17.7,24.4)	20.6 (17.7,24.4)	20.9 (18.3,24.2)	20.5 (18.2,23.4)	20.3 (18.2,22.8)	20.8 (19.0,23.0)	21.1 (19.1,23.4)	20.5 (18.3,22.9)	20.1 (17.1,23.2)	19.8 (16.4,23.3)	18.3 (14.1,22.7)	17.7 (13.5,22.0)	19.1 (15.6,23.2)	18.4 (15.0,22.3)	-1.0 (-2.8,0.7)
	Both	23.6 (20.0,27.6)	23.1 (19.8,26.9)	22.9 (19.9,26.6)	22.2 (19.2,25.9)	22.2 (19.3,26.0)	22.4 (19.8,26.0)	22.3 (19.9,25.3)	22.2 (20.0,24.9)	21.9 (19.8,24.3)	22.3 (20.2,24.8)	21.5 (19.3,23.9)	20.7 (18.3,23.4)	20.0 (17.3,23.0)	19.5 (16.5,22.8)	18.6 (15.5,22.1)	20.4 (17.0,24.4)	19.7 (16.3,23.5)	-1.1 (-2.7,0.4)
Woodruff County, AR	Male	27.8 (23.8,32.2)	27.1 (23.4,31.4)	27.0 (23.2,31.0)	26.5 (22.7,30.5)	26.2 (22.5,30.3)	27.4 (23.3,31.6)	26.3 (22.9,29.6)	26.3 (23.0,29.5)	25.6 (22.5,28.6)	25.6 (22.0,29.1)	24.2 (21.1,27.4)	23.7 (20.3,26.9)	24.7 (21.2,28.0)	24.4 (20.5,28.2)	23.2 (18.1,28.3)	24.3 (20.0,28.4)	23.4 (19.1,27.6)	-1.1 (-2.5,0.4)
	Female	22.6 (17.5,28.5)	22.3 (17.7,27.5)	22.0 (17.8,26.8)	22.4 (18.1,26.8)	22.4 (18.5,26.7)	22.6 (19.0,26.5)	21.5 (18.2,25.1)	21.8 (18.7,25.0)	21.2 (18.5,24.0)	22.4 (19.5,25.4)	23.3 (20.2,26.5)	22.9 (19.3,26.6)	24.1 (20.1,28.2)	23.7 (18.7,28.5)	21.0 (16.3,25.6)	19.8 (15.4,24.3)	19.2 (14.9,23.5)	-1.0 (-3.1,1.0)
	Both	25.1 (20.8,30.3)	24.7 (20.5,29.4)	24.4 (20.4,28.7)	24.4 (20.4,28.6)	24.3 (20.5,28.4)	25.0 (21.2,28.8)	23.9 (20.5,27.3)	24.0 (20.8,27.2)	23.4 (20.6,26.3)	24.0 (21.0,27.0)	23.8 (20.6,26.7)	23.3 (20.1,26.5)	24.4 (20.8,28.0)	24.0 (20.1,28.0)	22.0 (18.0,25.9)	22.0 (17.7,26.3)	21.2 (17.0,25.6)	-1.0 (-2.8,0.6)
Yell County, AR	Male	29.0 (24.9,33.2)	28.3 (24.2,32.2)	27.6 (23.7,31.5)	26.9 (22.9,30.8)	26.3 (22.4,30.2)	27.5 (23.5,31.6)	26.7 (23.4,30.1)	26.9 (23.8,30.2)	26.4 (23.6,29.5)	26.6 (23.3,30.1)	25.6 (22.7,28.7)	25.8 (23.0,29.1)	24.3 (21.4,27.5)	24.1 (20.8,27.7)	22.9 (18.2,27.5)	23.3 (19.7,27.5)	22.4 (18.6,26.4)	-1.6 (-3.0,-0.2)
	Female	26.3 (21.0,32.5)	25.7 (20.8,31.2)	25.2 (20.6,30.3)	25.4 (20.9,30.2)	25.3 (20.9,29.7)	25.4 (21.4,29.4)	25.4 (21.8,29.2)	26.0 (22.7,29.3)	24.8 (22.0,27.7)	24.9 (22.2,27.8)	24.1 (21.5,27.0)	24.2 (20.9,27.8)	22.7 (19.1,26.7)	22.6 (18.1,27.4)	21.3 (16.9,26.2)	20.6 (16.6,25.1)	19.7 (15.9,24.2)	-1.8 (-3.6,0.2)
	Both	27.7 (23.0,32.8)	27.0 (22.6,31.7)	26.4 (22.2,30.8)	26.1 (21.8,30.5)	25.8 (21.7,29.9)	26.4 (22.5,30.4)	26.0 (22.6,29.6)	26.4 (23.2,29.8)	25.6 (22.8,28.6)	25.7 (22.9,28.8)	24.8 (22.1,27.8)	25.0 (22.0,28.1)	23.4 (20.3,26.9)	23.3 (19.9,27.2)	22.1 (18.6,26.1)	21.9 (18.1,26.3)	21.0 (17.3,25.3)	-1.7 (-3.3,-0.1)
Apache County, AZ	Male	24.4 (20.5,28.6)	23.5 (19.9,27.6)	23.2 (19.6,27.3)	22.6 (19.2,26.5)	23.6 (20.1,27.7)	22.3 (18.8,26.2)	21.9 (18.8,25.1)	21.2 (18.3,24.2)	20.8 (18.0,23.6)	19.8 (16.8,23.0)	18.9 (16.3,21.6)	19.4 (16.7,22.3)	18.5 (15.9,21.6)	18.8 (15.7,22.4)	19.2 (14.8,23.6)	22.4 (18.8,26.5)	21.4 (17.8,25.3)	-0.8 (-2.3,0.7)
	Female	18.1 (13.9,22.8)	18.0 (14.2,22.2)	18.2 (14.5,22.1)	17.9 (14.5,21.8)	17.9 (14.9,21.7)	18.2 (15.4,21.6)	18.0 (15.4,20.9)	16.6 (14.4,19.2)	16.5 (14.4,18.8)	16.4 (14.5,18.6)	14.9 (12.9,16.9)	15.5 (13.0,18.1)	15.0 (12.2,17.9)	14.6 (11.4,18.2)	13.3 (10.0,17.0)	14.9 (12.1,18.3)	14.4 (11.7,17.5)	-1.4 (-3.5,0.7)
	Both	21.2 (17.2,25.5)	20.7 (16.9,24.8)	20.6 (17.2,24.6)	20.2 (16.8,24.1)	20.7 (17.4,24.7)	20.2 (17.1,23.7)	19.9 (17.0,23.0)	18.9 (16.3,21.6)	18.6 (16.2,21.1)	18.1 (15.8,20.7)	16.9 (14.7,19.1)	17.4 (15.0,20.0)	16.7 (14.1,19.6)	16.7 (13.9,19.9)	16.2 (13.3,19.8)	18.6 (15.4,22.3)	17.8 (14.7,21.3)	-1.1 (-2.8,0.7)
Cochise County, AZ	Male	20.9 (18.2,24.0)	20.1 (17.6,23.2)	19.8 (17.3,22.8)	19.2 (16.8,22.1)	18.4 (16.1,21.4)	18.2 (15.8,21.1)	18.6 (16.6,21.0)	20.4 (18.5,22.7)	20.6 (18.8,22.7)	21.5 (19.4,23.8)	22.4 (20.6,24.3)	22.0 (20.0,24.0)	21.3 (19.2,23.4)	21.4 (19.0,23.9)	20.2 (16.9,23.6)	16.9 (14.3,19.7)	16.1 (13.5,18.8)	-1.6 (-3.0,-0.2)
	Female	16.2 (12.9,19.8)	15.8 (12.9,18.9)	15.6 (13.0,18.5)	15.4 (13.1,18.2)	16.2 (14.0,19.0)	15.5 (13.6,17.8)	16.4 (14.8,18.4)	16.3 (14.9,17.9)	15.8 (14.6,17.2)	16.0 (14.6,17.4)	17.0 (15.5,18.6)	16.9 (14.8,19.2)	17.0 (14.7,19.6)	17.2 (14.2,20.5)	15.8 (12.8,19.0)	13.1 (10.7,15.6)	12.4 (10.2,14.9)	-1.6 (-3.4,0.3)
	Both	18.5 (15.7,21.7)	17.9 (15.3,20.9)	17.7 (15.2,20.6)	17.3 (14.9,20.1)	17.3 (15.0,20.2)	16.8 (14.7,19.4)	17.5 (15.7,19.7)	18.3 (16.7,20.3)	18.2 (16.7,19.9)	18.7 (17.2,20.3)	19.7 (18.0,21.3)	19.4 (17.5,21.3)	19.1 (17.1,21.4)	19.3 (17.0,21.7)	18.0 (15.6,20.4)	15.0 (12.5,17.6)	14.2 (11.8,16.8)	-1.6 (-3.1,-0.1)
Coconino County, AZ	Male	20.3 (17.8,23.4)	19.6 (17.2,22.3)	19.3 (16.9,21.8)	19.0 (16.8,21.5)	18.9 (16.7,21.3)	18.6 (16.4,21.1)	18.2 (16.2,20.3)	17.7 (15.7,19.8)	16.9 (15.1,18.9)	16.1 (14.0,18.5)	15.9 (14.0,17.9)	16.9 (14.8,19.1)	15.8 (13.7,18.0)	16.3 (13.9,18.9)	16.7 (13.6,20.0)	16.5 (13.9,19.4)	15.8 (13.2,18.7)	-1.6 (-3.0,-0.2)
	Female	15.7 (12.9,18.9)	15.4 (13.1,18.2)	15.3 (13.1,17.8)	14.6 (12.6,16.9)	14.7 (12.7,16.8)	14.0 (12.4,15.9)	14.2 (12.6,15.8)	13.2 (11.8,14.7)	13.3 (11.9,14.8)	13.0 (11.6,14.6)	12.3 (10.8,13.9)	11.7 (9.9,13.7)	11.6 (9.6,13.8)	11.7 (9.1,14.3)	11.1 (8.5,13.9)	12.6 (10.4,15.2)	12.1 (9.9,14.6)	-1.6 (-3.3,0.0)
	Both	17.9 (15.4,20.9)	17.4 (15.2,20.2)	17.2 (15.1,19.8)	16.7 (14.6,19.2)	16.8 (14.6,19.0)	16.3 (14.3,18.3)	16.1 (14.4,18.0)	15.4 (13.7,17.2)	15.1 (13.5,16.8)	14.5 (12.9,16.3)	14.1 (12.4,15.9)	14.2 (12.5,16.2)	13.7 (11.8,15.9)	13.9 (11.8,16.3)	13.9 (11.6,16.3)	14.5 (12.1,17.3)	13.9 (11.5,16.6)	-1.6 (-3.1,-0.2)
Gila County, AZ	Male	25.7 (22.3,29.6)	24.8 (21.5,28.5)	24.4 (21.1,28.1)	22.7 (19.6,26.3)	22.9 (19.5,26.5)	22.9 (19.7,26.6)	22.6 (19.9,25.9)	22.3 (19.6,25.4)	22.3 (19.7,25.1)	21.7 (18.8,24.8)	21.3 (18.9,23.8)	21.9 (19.4,24.6)	21.7 (19.1,24.4)	20.8 (17.7,23.8)	21.2 (17.1,25.6)	21.5 (18.3,24.9)	20.6 (17.5,24.0)	-1.4 (-2.7,0.0)
	Female	21.1 (16.7,26.4)	20.8 (16.8,25.5)	20.6 (17.1,24.8)	19.6 (16.4,23.5)	19.9 (16.7,23.7)	19.3 (16.4,22.4)	19.4 (16.8,22.4)	19.0 (16.5,21.6)	19.0 (16.8,21.3)	17.6 (15.6,19.8)	18.2 (16.0,20.5)	18.8 (16.1,21.6)	18.2 (15.2,21.2)	19.6 (16.0,23.3)	18.7 (15.0,22.5)	18.6 (15.4,22.0)	17.9 (14.9,21.1)	-1.1 (-2.8,0.7)
	Both	23.4 (19.5,27.9)	22.7 (19.3,27.0)	22.5 (19.2,26.3)	21.1 (17.9,24.9)	21.4 (18.1,25.0)	21.1 (18.1,24.5)	21.0 (18.4,24.1)	20.6 (18.0,23.4)	20.6 (18.3,23.1)	19.6 (17.3,22.0)	19.7 (17.5,22.0)	20.3 (17.9,22.8)	19.9 (17.4,22.7)	20.2 (17.4,23.2)	19.9 (16.9,23.1)	20.0 (16.8,23.4)	19.2 (16.2,22.5)	-1.2 (-2.7,0.3)
Graham County, AZ	Male	23.8 (20.3,27.6)	23.0 (19.7,26.7)	22.8 (19.5,26.5)	21.2 (18.1,24.7)	20.9 (17.8,24.4)	20.4 (17.3,24.1)	20.5 (17.8,23.5)	20.7 (18.1,23.6)	20.8 (18.5,23.6)	20.4 (17.8,23.4)	19.2 (17.0,21.8)	19.1 (16.8,22.0)	18.2 (15.8,21.2)	16.9 (14.1,20.2)	17.1 (13.7,21.3)	19.1 (16.0,22.9)	18.2 (15.2,21.9)	-1.7 (-3.1,-0.2)
	Female	17.8 (13.6,22.8)	17.6 (13.8,22.0)	17.6 (14.1,21.8)	16.9 (13.8,20.7)	16.8 (13.8,20.4)	15.8 (13.2,18.8)	15.3 (13.1,17.9)	14.5 (12.6,16.8)	14.6 (12.8,16.8)	14.6 (12.9,16.7)	15.0 (13.2,17.1)	14.9 (12.7,17.4)	15.3 (12.9,18.2)	14.2 (11.2,17.7)	13.8 (10.7,17.4)	14.5 (11.9,17.9)	13.9 (11.4,17.1)	-1.5 (-3.5,0.6)
	Both	20.8 (17.1,25.1)	20.3 (16.8,24.4)	20.1 (16.9,24.0)	19.0 (15.9,22.6)	18.8 (15.7,22.4)	18.1 (15.3,21.3)	17.9 (15.4,20.7)	17.6 (15.4,20.1)	17.7 (15.6,20.1)	17.4 (15.4,19.8)	17.0 (15.1,19.4)	17.0 (14.9,19.4)	16.8 (14.6,19.5)	15.5 (13.1,18.5)	15.4 (12.7,18.7)	16.8 (13.9,20.3)	16.0 (13.3,19.4)	-1.6 (-3.3,0.1)
Greenlee County, AZ	Male	21.5 (18.2,25.5)	20.8 (17.6,24.7)	20.5 (17.3,24.4)	19.8 (16.7,23.7)	19.8 (16.6,23.8)	18.7 (15.7,22.6)	19.0 (16.2,22.3)	18.8 (16.3,22.0)	18.5 (16.0,21.3)	18.1 (15.5,21.3)	18.1 (15.7,20.8)	17.8 (15.6,20.5)	15.9 (13.8,18.4)	16.7 (14.3,19.5)	15.9 (12.8,19.2)	16.5 (13.9,19.6)	15.7 (13.2,18.8)	-2.0 (-3.4,-0.5)
	Female	13.8 (10.3,18.3)	13.7 (10.5,17.9)	13.7 (10.7,17.7)	13.9 (11.1,17.8)	14.2 (11.3,18.1)	14.2 (11.5,17.6)	14.3 (11.8,17.6)	14.1 (11.8,17.1)	14.4 (12.2,17.1)	13.9 (12.0,16.3)	14.7 (12.8,17.1)	14.7 (12.6,17.1)	13.9 (11.6,16.6)	14.2 (11.4,17.3)	13.9 (11.1,17.1)	12.5 (10.1,15.4)	12.0 (9.8,14.8)	-0.9 (-3.0,1.3)
	Both	17.6 (14.2,21.9)	17.2 (14.0,21.2)	17.1 (14.1,21.0)	16.8 (13.8,20.7)	17.0 (14.0,20.9)	16.4 (13.5,20.1)	16.6 (13.9,20.0)	16.4 (14.0,19.4)	16.4 (14.1,19.2)	16.0 (13.7,18.7)	16.4 (14.3,18.7)	16.3 (14.3,18.7)	14.9 (12.9,17.3)	15.4 (13.3,18.0)	14.9 (12.6,17.7)	14.4 (12.0,17.4)	13.8 (11.4,16.8)	-1.5 (-3.2,0.2)
La Paz County, AZ	Male	26.2 (22.8,30.2)	25.4 (22.1,29.2)	25.2 (21.8,29.0)	25.0 (21.6,28.9)	24.3 (20.8,28.2)	24.5 (21.0,28.5)	22.8 (19.8,26.1)	22.0 (19.0,25.3)	20.8 (18.1,23.7)	20.8 (17.8,24.2)	20.6 (17.9,23.4)	21.8 (19.1,24.7)	22.1 (19.3,24.8)	22.4 (19.3,25.5)	22.1 (18.1,26.1)	20.2 (16.7,23.5)	19.2 (15.9,22.5)	-1.9 (-3.3,-0.7)
	Female	21.2 (16.9,26.9)	21.0 (17.0,26.0)	21.0 (17.4,25.6)	21.2 (17.6,25.5)	22.0 (18.3,26.3)	22.8 (19.1,27.0)	23.3 (19.7,27.5)	21.9 (18.7,25.5)	21.1 (18.2,24.4)	20.5 (17.9,23.5)	19.9 (17.5,22.4)	21.7 (18.8,24.3)	22.0 (19.0,25.0)	21.8 (18.2,25.5)	20.4 (16.8,24.1)	18.1 (14.8,21.4)	17.4 (14.2,20.6)	-1.3 (-3.1,0.4)
	Both	23.7 (19.8,28.3)	23.1 (19.6,27.5)	23.0 (19.5,27.2)	23.1 (19.5,27.1)	23.1 (19.6,27.2)	23.6 (20.1,27.7)	23.1 (19.8,26.8)	21.9 (18.9,25.3)	20.9 (18.1,24.0)	20.6 (17.9,23.5)	20.2 (17.8,22.9)	21.7 (19.1,24.3)	22.0 (19.3,24.6)	22.1 (19.2,24.8)	21.2 (18.1,24.3)	19.1 (15.8,22.4)	18.3 (15.0,21.5)	-1.6 (-3.2,-0.1)
Maricopa County, AZ	Male	23.0 (21.0,25.2)	22.0 (20.0,24.0)	21.5 (19.5,23.5)	20.2 (18.3,22.1)	20.5 (18.6,22.4)	19.7 (17.8,21.5)	18.1 (16.4,19.7)	18.2 (16.6,19.7)	17.7 (16.3,19.1)	17.1 (15.5,18.6)	16.1 (14.9,17.3)	15.6 (14.5,16.8)	14.9 (13.8,16.2)	14.7 (13.4,16.2)	14.3 (12.2,16.4)	15.1 (13.5,16.8)	14.3 (12.8,16.0)	-3.0 (-3.9,-2.0)
	Female	17.8 (15.8,20.0)	17.2 (15.5,19.0)	16.8 (15.2,18.4)	16.1 (14.6,17.7)	15.8 (14.3,17.4)	15.7 (14.3,17.0)	15.6 (14.4,16.7)	15.9 (14.9,16.9)	15.3 (14.4,16.2)	14.4 (13.6,15.3)	13.7 (12.7,14.6)	12.8 (11.5,14.1)	11.8 (10.3,13.3)	11.7 (10.1,13.5)	11.9 (10.2,13.8)	12.6 (11.2,14.1)	12.0 (10.7,13.4)	-2.4 (-3.5,-1.4)
	Both	20.3 (18.4,22.5)	19.6 (17.8,21.4)	19.1 (17.3,20.9)	18.1 (16.4,19.8)	18.1 (16.4,19.8)	17.7 (16.0,19.2)	16.8 (15.4,18.2)	17.0 (15.7,18.2)	16.5 (15.3,17.6)	15.7 (14.7,16.8)	14.8 (13.9,15.9)	14.2 (13.2,15.2)	13.3 (12.1,14.6)	13.2 (11.9,14.6)	13.1 (11.8,14.6)	13.8 (12.3,15.4)	13.1 (11.7,14.7)	-2.7 (-3.7,-1.8)
Mohave County, AZ	Male	30.5 (27.2,34.0)	29.5 (26.3,32.8)	29.1 (26.0,32.4)	29.2 (26.1,32.4)	28.1 (25.0,31.2)	28.0 (25.0,31.2)	26.8 (24.1,29.6)	26.3 (23.8,28.9)	24.9 (22.6,27.3)	24.9 (22.3,27.6)	24.6 (22.4,27.0)	24.8 (22.6,27.2)	24.2 (22.0,26.7)	24.0 (21.5,26.7)	23.4 (19.9,27.1)	22.1 (19.2,25.3)	21.1 (18.3,24.2)	-2.3 (-3.4,-1.2)
	Female	28.7 (24.4,33.1)	27.7 (24.0,31.4)	26.9 (23.7,30.4)	24.9 (21.9,28.1)	26.0 (23.1,29.0)	25.5 (23.0,28.0)	26.1 (23.9,28.4)	26.4 (24.3,28.5)	25.9 (24.0,27.8)	25.2 (23.2,27.2)	25.4 (23.4,27.6)	25.0 (22.5,27.8)	25.1 (22.2,28.1)	24.7 (21.4,28.3)	25.1 (21.6,28.9)	23.6 (20.5,26.8)	22.6 (19.7,25.8)	-1.5 (-2.7,-0.2)
	Both	29.6 (26.0,33.4)	28.6 (25.3,32.1)	28.0 (24.8,31.3)	27.0 (24.0,30.2)	27.0 (24.0,30.1)	26.7 (24.0,29.6)	26.4 (24.0,28.9)	26.4 (24.1,28.7)	25.4 (23.4,27.6)	25.0 (23.0,27.2)	25.0 (23.0,27.2)	24.9 (22.7,27.2)	24.7 (22.3,27.2)	24.4 (21.7,27.2)	24.3 (21.5,27.3)	22.8 (19.9,26.1)	21.8 (19.0,25.0)	-1.9 (-3.1,-0.8)
Navajo County, AZ	Male	25.2 (21.8,28.7)	24.4 (21.0,27.7)	24.0 (20.9,27.3)	23.0 (19.9,26.1)	23.9 (20.8,27.2)	23.1 (20.1,26.1)	22.5 (19.8,25.2)	22.4 (19.9,25.1)	22.5 (20.2,25.0)	20.6 (18.0,23.4)	19.8 (17.6,22.3)	20.0 (17.6,22.6)	19.1 (16.6,21.9)	17.6 (14.6,20.7)	18.4 (14.1,22.3)	19.8 (16.6,23.5)	18.9 (15.9,22.5)	-1.8 (-3.2,-0.5)
	Female	21.2 (17.1,25.4)	20.7 (17.0,24.5)	20.5 (17.2,23.9)	18.8 (15.9,21.8)	18.4 (15.7,21.2)	17.5 (15.2,20.0)	18.2 (16.1,20.5)	16.6 (14.8,18.6)	15.8 (14.2,17.6)	15.7 (14.0,17.5)	14.4 (12.7,16.4)	13.7 (11.5,16.0)	14.2 (11.7,16.8)	14.5 (11.3,17.7)	14.3 (11.0,17.6)	15.4 (12.5,18.7)	14.8 (12.1,18.0)	-2.2 (-3.9,-0.6)
	Both	23.2 (19.5,26.9)	22.5 (19.2,25.9)	22.3 (19.0,25.6)	20.9 (17.9,23.9)	21.1 (18.3,24.1)	20.3 (17.7,23.0)	20.3 (18.0,22.8)	19.4 (17.4,21.8)	19.1 (17.2,21.2)	18.1 (16.2,20.2)	17.0 (15.1,19.2)	16.8 (14.6,19.1)	16.6 (14.3,19.2)	16.0 (13.5,18.9)	16.3 (13.5,19.4)	17.6 (14.6,21.0)	16.8 (13.9,20.2)	-2.0 (-3.5,-0.5)
Pima County, AZ	Male	21.0 (18.9,23.4)	20.2 (18.2,22.4)	19.9 (18.0,21.9)	18.5 (16.8,20.5)	18.4 (16.6,20.2)	18.3 (16.6,20.2)	17.6 (16.1,19.2)	18.2 (16.7,19.8)	18.1 (16.7,19.6)	18.6 (16.9,20.3)	18.0 (16.6,19.4)	18.1 (16.6,19.5)	16.5 (14.9,17.9)	16.2 (14.4,17.9)	15.1 (12.5,17.6)	14.8 (12.7,16.8)	14.0 (12.0,16.1)	-2.5 (-3.6,-1.4)
	Female	17.4 (15.1,20.1)	16.9 (15.0,19.2)	16.6 (15.0,18.5)	15.9 (14.3,17.7)	15.8 (14.3,17.4)	15.3 (14.0,16.6)	14.8 (13.7,15.8)	14.6 (13.7,15.6)	14.4 (13.5,15.3)	13.9 (12.9,14.9)	14.6 (13.4,15.8)	14.1 (12.6,15.8)	13.1 (11.3,15.0)	13.5 (11.3,15.8)	13.2 (10.9,15.5)	13.3 (11.4,15.1)	12.6 (10.9,14.3)	-2.0 (-3.3,-0.8)
	Both	19.2 (17.0,21.7)	18.5 (16.7,20.7)	18.2 (16.5,20.2)	17.2 (15.5,19.1)	17.1 (15.5,18.8)	16.8 (15.3,18.3)	16.2 (14.9,17.5)	16.4 (15.2,17.6)	16.2 (15.1,17.4)	16.2 (15.1,17.4)	16.3 (15.0,17.4)	16.1 (14.7,17.4)	14.8 (13.3,16.4)	14.8 (13.1,16.5)	14.1 (12.3,15.9)	14.0 (12.0,16.0)	13.3 (11.4,15.2)	-2.3 (-3.5,-1.1)
Pinal County, AZ	Male	28.2 (24.5,31.9)	27.2 (23.8,30.7)	26.9 (23.5,30.3)	24.5 (21.3,27.7)	24.1 (21.0,27.3)	22.9 (19.8,25.9)	21.7 (19.2,24.1)	21.4 (19.0,23.6)	21.5 (19.3,23.5)	20.5 (18.1,22.7)	19.3 (17.4,21.3)	19.4 (17.3,21.5)	18.7 (16.6,20.9)	17.4 (14.8,20.0)	18.0 (14.3,21.3)	19.1 (16.3,22.2)	18.2 (15.5,21.2)	-2.7 (-3.9,-1.4)
	Female	20.7 (16.8,25.0)	20.2 (16.7,23.7)	20.0 (16.8,23.3)	18.7 (15.7,21.7)	19.4 (16.5,22.2)	18.5 (16.1,20.9)	18.1 (16.1,20.2)	17.8 (16.2,19.5)	16.8 (15.3,18.2)	15.9 (14.4,17.4)	15.2 (13.7,17.0)	14.9 (12.9,17.1)	14.8 (12.6,17.4)	15.0 (12.4,18.3)	16.2 (13.4,19.6)	17.1 (14.5,19.9)	16.4 (13.8,19.1)	-1.5 (-3.0,0.1)
	Both	24.4 (20.7,28.1)	23.7 (20.2,27.2)	23.4 (20.2,26.7)	21.6 (18.5,24.6)	21.7 (18.7,24.7)	20.6 (18.0,23.3)	19.9 (17.7,22.1)	19.6 (17.6,21.5)	19.1 (17.2,20.8)	18.2 (16.4,19.9)	17.2 (15.6,19.0)	17.1 (15.3,19.0)	16.7 (14.6,18.9)	16.2 (13.8,18.6)	17.1 (14.7,19.7)	18.1 (15.4,21.0)	17.3 (14.6,20.1)	-2.1 (-3.5,-0.7)
Santa Cruz County, AZ	Male	18.9 (15.5,22.3)	18.2 (14.9,21.4)	17.8 (14.7,21.0)	16.7 (13.6,19.7)	16.1 (13.3,19.2)	15.9 (12.9,18.8)	15.7 (13.3,18.0)	17.8 (15.4,20.1)	17.5 (15.5,19.6)	18.5 (16.3,20.8)	18.2 (16.4,20.2)	18.8 (16.9,20.9)	16.9 (15.1,19.2)	17.1 (14.9,19.6)	14.7 (11.6,17.8)	12.9 (10.6,15.7)	12.3 (10.1,15.0)	-2.7 (-4.4,-1.0)
	Female	11.1 (8.1,14.4)	10.9 (8.1,13.8)	10.9 (8.2,13.6)	11.7 (9.0,14.5)	12.8 (10.1,15.7)	11.4 (9.1,13.9)	10.8 (9.0,12.6)	10.2 (8.9,11.6)	10.2 (9.0,11.4)	10.2 (9.1,11.5)	10.2 (9.0,11.7)	10.4 (8.8,12.3)	10.2 (8.4,12.4)	9.9 (7.6,12.5)	9.3 (6.9,11.9)	9.1 (7.2,11.4)	8.7 (7.0,10.9)	-1.5 (-3.7,1.0)
	Both	14.9 (11.8,18.1)	14.5 (11.4,17.5)	14.3 (11.4,17.2)	14.2 (11.3,17.0)	14.5 (11.7,17.4)	13.6 (11.1,16.3)	13.2 (11.1,15.3)	13.9 (12.1,15.8)	13.8 (12.2,15.4)	14.3 (12.8,15.9)	14.1 (12.7,15.8)	14.5 (13.0,16.5)	13.5 (11.8,15.6)	13.4 (11.6,15.8)	11.9 (10.0,14.3)	11.0 (8.9,13.5)	10.5 (8.5,12.9)	-2.2 (-4.1,-0.3)
Yavapai County, AZ	Male	25.5 (22.3,28.7)	24.5 (21.4,27.5)	24.0 (21.1,27.1)	23.3 (20.4,26.4)	22.8 (19.9,25.8)	23.1 (20.1,26.1)	22.0 (19.5,24.7)	22.1 (19.6,24.7)	20.5 (18.3,22.8)	20.7 (18.3,23.3)	19.5 (17.4,21.7)	20.2 (18.1,22.5)	19.3 (17.3,21.7)	19.5 (17.2,22.0)	18.6 (15.2,22.0)	19.0 (16.2,22.1)	18.1 (15.3,21.1)	-2.1 (-3.4,-0.8)
	Female	22.0 (18.3,26.0)	21.2 (18.0,24.7)	20.7 (17.7,23.9)	20.6 (17.8,23.4)	21.3 (18.6,24.2)	21.2 (18.7,23.7)	21.4 (19.3,23.7)	21.5 (19.5,23.6)	20.5 (18.6,22.4)	18.6 (17.0,20.5)	18.8 (17.0,20.9)	19.6 (17.3,22.3)	19.4 (16.6,22.2)	18.5 (15.3,21.9)	17.8 (14.4,21.3)	15.7 (13.1,18.6)	15.1 (12.6,17.9)	-2.4 (-4.0,-0.7)
	Both	23.7 (20.3,27.4)	22.8 (19.7,26.0)	22.4 (19.4,25.4)	21.9 (19.0,24.9)	22.0 (19.2,24.8)	22.1 (19.4,24.9)	21.7 (19.4,24.2)	21.8 (19.6,24.1)	20.5 (18.5,22.6)	19.7 (17.7,21.7)	19.1 (17.3,21.2)	19.9 (17.9,22.2)	19.4 (17.2,21.9)	19.0 (16.6,21.8)	18.2 (15.8,20.9)	17.3 (14.6,20.3)	16.6 (14.0,19.5)	-2.2 (-3.7,-0.8)
Yuma County, AZ	Male	23.3 (19.9,27.0)	22.4 (19.3,25.9)	21.9 (18.7,25.5)	21.0 (17.9,24.3)	20.5 (17.4,23.8)	20.0 (17.0,23.3)	18.8 (16.4,21.4)	17.6 (15.5,19.9)	17.0 (15.1,19.0)	16.7 (14.6,18.8)	16.0 (14.3,17.8)	15.7 (13.9,17.6)	16.0 (14.1,18.0)	15.1 (12.9,17.3)	14.7 (11.7,17.5)	15.0 (12.6,17.6)	14.2 (11.9,16.8)	-3.1 (-4.5,-1.6)
	Female	15.1 (11.9,19.1)	14.8 (11.8,18.3)	14.7 (11.9,17.9)	14.2 (11.6,17.1)	14.0 (11.6,16.8)	14.4 (12.1,16.8)	14.6 (12.8,16.6)	13.7 (12.2,15.3)	12.8 (11.6,14.1)	12.5 (11.3,13.7)	11.5 (10.3,12.8)	11.1 (9.5,12.7)	10.6 (8.8,12.5)	10.5 (8.3,12.8)	9.6 (7.4,12.0)	10.4 (8.6,12.5)	9.9 (8.2,11.9)	-2.6 (-4.5,-0.7)
	Both	19.1 (15.9,22.8)	18.5 (15.4,21.9)	18.2 (15.3,21.5)	17.5 (14.8,20.6)	17.2 (14.5,20.3)	17.1 (14.5,20.0)	16.7 (14.5,19.0)	15.6 (13.8,17.5)	14.9 (13.3,16.5)	14.5 (13.1,16.0)	13.7 (12.3,15.2)	13.3 (11.8,14.9)	13.2 (11.5,15.1)	12.7 (10.8,14.7)	12.1 (10.2,14.2)	12.7 (10.6,15.0)	12.0 (10.0,14.3)	-2.9 (-4.5,-1.3)
Alameda County, CA	Male	17.4 (15.1,20.0)	16.9 (14.7,19.4)	16.5 (14.3,18.9)	16.2 (14.0,18.6)	16.6 (14.3,19.1)	16.0 (13.6,18.5)	14.7 (12.7,16.9)	14.2 (12.3,16.3)	14.1 (12.4,16.0)	13.2 (11.4,15.2)	13.3 (11.8,15.1)	12.5 (11.1,14.1)	12.0 (10.7,13.7)	11.6 (10.0,13.3)	11.2 (9.1,13.5)	10.8 (9.0,12.9)	10.3 (8.6,12.3)	-3.3 (-4.8,-1.9)
	Female	11.3 (9.2,14.2)	11.1 (9.2,13.5)	10.8 (9.0,12.9)	10.7 (8.9,12.8)	10.8 (9.0,12.8)	10.5 (8.9,12.4)	10.6 (9.1,12.5)	11.1 (9.7,12.9)	10.2 (9.0,11.6)	8.9 (7.8,10.1)	8.9 (7.8,10.1)	8.0 (6.8,9.4)	7.4 (6.1,9.0)	7.3 (5.7,9.1)	7.4 (5.6,9.3)	7.3 (5.9,9.1)	7.0 (5.7,8.7)	-3.0 (-4.9,-1.1)
	Both	14.3 (12.2,16.9)	14.0 (11.9,16.3)	13.6 (11.6,15.8)	13.4 (11.4,15.6)	13.6 (11.6,15.8)	13.2 (11.2,15.3)	12.6 (10.8,14.6)	12.6 (11.0,14.6)	12.1 (10.7,13.8)	11.0 (9.6,12.6)	11.0 (9.8,12.5)	10.2 (9.1,11.6)	9.7 (8.5,11.1)	9.4 (8.1,11.0)	9.2 (7.8,10.9)	9.0 (7.4,11.0)	8.6 (7.1,10.5)	-3.2 (-4.8,-1.6)
Alpine County, CA	Male	17.9 (14.9,21.4)	17.6 (14.7,20.9)	17.2 (14.4,20.5)	16.6 (13.9,19.9)	16.2 (13.4,19.4)	16.0 (13.1,19.3)	16.2 (13.8,19.2)	16.3 (13.9,19.2)	16.8 (14.4,19.6)	16.5 (14.0,19.7)	16.0 (13.6,18.9)	15.8 (13.4,18.6)	14.7 (12.4,17.4)	14.1 (11.6,17.3)	14.4 (11.3,18.5)	14.4 (11.9,17.6)	13.7 (11.2,16.9)	-1.7 (-3.3,0.0)
	Female	15.8 (11.7,20.9)	15.8 (12.0,20.5)	15.6 (12.1,19.9)	15.7 (12.4,19.7)	15.6 (12.4,19.5)	15.4 (12.4,18.9)	15.2 (12.4,18.6)	14.9 (12.2,18.0)	15.3 (12.8,18.1)	15.0 (12.6,17.6)	14.7 (12.3,17.2)	14.1 (11.7,17.0)	12.1 (9.6,15.0)	11.3 (8.4,14.8)	10.7 (7.9,14.1)	10.6 (8.2,13.8)	9.9 (7.7,12.8)	-2.9 (-5.2,-0.4)
	Both	16.8 (13.3,21.1)	16.7 (13.3,20.7)	16.4 (13.3,20.1)	16.2 (13.1,19.8)	15.9 (12.9,19.4)	15.7 (12.9,19.0)	15.7 (13.1,18.8)	15.6 (13.1,18.6)	16.0 (13.6,18.9)	15.7 (13.4,18.6)	15.3 (13.0,17.9)	14.9 (12.6,17.5)	13.4 (11.0,16.0)	12.7 (10.3,15.5)	12.5 (10.1,15.6)	12.4 (10.0,15.7)	11.7 (9.4,14.8)	-2.3 (-4.2,-0.2)
Amador County, CA	Male	21.1 (18.0,24.9)	20.6 (17.6,24.3)	20.2 (17.3,23.8)	19.5 (16.6,23.1)	19.0 (16.1,22.7)	18.8 (15.9,22.4)	18.6 (16.1,21.6)	18.8 (16.3,22.0)	19.2 (16.7,22.4)	19.4 (16.5,23.0)	19.1 (16.4,22.3)	19.4 (16.5,22.7)	19.0 (16.3,22.3)	19.0 (15.8,22.9)	19.1 (14.9,24.0)	19.2 (16.0,22.9)	18.4 (15.3,22.0)	-0.8 (-2.4,0.6)
	Female	17.4 (13.5,22.6)	17.3 (13.8,21.9)	17.2 (13.9,21.6)	17.3 (14.1,21.5)	17.0 (13.9,21.1)	16.7 (13.8,20.4)	16.6 (13.8,20.1)	16.9 (14.2,20.2)	17.2 (14.6,20.4)	16.9 (14.6,19.8)	16.6 (14.2,19.7)	15.8 (13.1,19.0)	16.1 (13.0,19.5)	15.4 (11.6,19.3)	15.1 (11.4,19.0)	15.2 (12.0,19.0)	14.6 (11.5,18.2)	-1.1 (-3.3,0.9)
	Both	19.2 (15.8,23.6)	18.9 (15.7,23.1)	18.7 (15.6,22.7)	18.3 (15.3,22.3)	18.0 (15.0,21.9)	17.7 (14.9,21.4)	17.6 (14.9,20.9)	17.9 (15.3,21.1)	18.2 (15.7,21.3)	18.1 (15.5,21.3)	17.9 (15.4,20.9)	17.6 (14.9,20.7)	17.5 (14.6,20.6)	17.2 (14.1,20.5)	17.0 (13.9,20.7)	17.2 (13.9,20.9)	16.5 (13.4,20.0)	-1.0 (-2.8,0.7)
Butte County, CA	Male	20.6 (18.0,24.2)	20.1 (17.5,23.6)	19.7 (17.1,23.0)	19.0 (16.5,22.4)	18.5 (15.8,21.8)	18.8 (16.2,22.2)	18.9 (16.5,21.8)	18.8 (16.5,21.6)	18.7 (16.4,21.3)	18.0 (15.5,20.7)	17.2 (15.0,19.6)	16.7 (14.5,19.0)	17.6 (15.5,20.0)	16.3 (13.9,18.9)	16.2 (13.0,19.6)	15.8 (13.2,18.8)	15.1 (12.5,18.0)	-1.9 (-3.6,-0.5)
	Female	18.0 (14.5,23.0)	17.9 (14.7,22.3)	17.8 (14.9,21.8)	17.5 (14.7,21.3)	17.9 (15.1,21.6)	17.5 (14.7,20.7)	17.3 (14.8,20.4)	17.1 (14.8,19.8)	16.1 (14.1,18.4)	15.7 (13.7,17.9)	15.5 (13.4,17.7)	14.7 (12.0,17.2)	14.6 (11.6,17.5)	15.4 (11.6,18.9)	15.3 (11.5,19.0)	16.0 (13.0,19.3)	15.4 (12.5,18.5)	-1.0 (-3.1,0.9)
	Both	19.3 (16.2,23.4)	19.0 (16.2,22.9)	18.7 (16.0,22.4)	18.3 (15.6,21.9)	18.2 (15.5,21.7)	18.1 (15.5,21.5)	18.1 (15.6,21.0)	18.0 (15.6,20.7)	17.4 (15.3,19.9)	16.9 (14.7,19.2)	16.3 (14.2,18.5)	15.7 (13.5,17.9)	16.1 (13.7,18.6)	15.9 (13.2,18.5)	15.8 (13.2,18.6)	15.9 (13.1,19.0)	15.2 (12.5,18.2)	-1.5 (-3.3,0.1)
Calaveras County, CA	Male	21.0 (17.4,24.5)	20.5 (17.0,23.9)	20.1 (16.8,23.6)	19.4 (16.1,22.8)	18.6 (15.4,22.1)	18.8 (15.5,22.4)	18.4 (15.5,21.5)	18.1 (15.4,21.0)	18.1 (15.6,20.8)	18.0 (15.0,20.9)	17.8 (15.1,20.4)	17.7 (14.9,20.3)	16.9 (14.4,19.5)	16.0 (13.3,18.8)	16.4 (12.5,20.0)	16.3 (13.5,19.6)	15.6 (12.9,18.7)	-1.9 (-3.3,-0.3)
	Female	17.0 (12.7,21.7)	16.9 (12.9,21.1)	16.7 (12.8,20.7)	16.5 (12.8,20.3)	15.9 (12.5,19.8)	15.8 (12.8,19.3)	15.2 (12.5,18.4)	15.8 (13.2,18.8)	15.9 (13.4,18.5)	16.0 (13.5,18.4)	15.9 (13.4,18.3)	15.5 (12.9,18.4)	14.4 (11.8,17.6)	14.1 (11.0,17.9)	13.8 (10.6,17.7)	13.7 (10.9,17.3)	13.1 (10.5,16.4)	-1.6 (-3.6,0.7)
	Both	19.0 (15.1,23.0)	18.7 (14.9,22.4)	18.4 (14.7,22.0)	17.9 (14.4,21.5)	17.2 (13.9,20.9)	17.3 (14.1,20.8)	16.8 (14.0,19.9)	17.0 (14.3,19.9)	17.0 (14.5,19.6)	17.0 (14.4,19.6)	16.8 (14.3,19.3)	16.6 (14.1,19.2)	15.6 (13.1,18.4)	15.1 (12.4,18.0)	15.1 (12.4,18.1)	15.0 (12.2,18.4)	14.3 (11.6,17.6)	-1.8 (-3.4,0.2)
Colusa County, CA	Male	21.8 (18.3,25.6)	21.3 (17.9,25.1)	20.8 (17.4,24.5)	20.4 (17.1,24.2)	19.6 (16.2,23.3)	19.7 (16.3,23.5)	19.3 (16.5,22.6)	19.0 (16.4,22.1)	18.7 (16.3,21.5)	18.5 (15.8,21.8)	17.9 (15.6,20.8)	17.4 (15.0,20.4)	17.1 (14.8,20.2)	16.0 (13.4,19.1)	15.8 (12.3,20.1)	15.3 (12.7,18.7)	14.6 (12.0,17.9)	-2.5 (-4.1,-0.8)
	Female	16.6 (12.3,21.4)	16.4 (12.6,20.8)	16.2 (12.7,20.4)	16.0 (12.6,20.1)	16.2 (12.9,20.2)	16.5 (13.4,20.1)	16.4 (13.5,19.9)	15.4 (13.0,18.5)	14.7 (12.6,17.4)	13.9 (12.0,16.4)	13.1 (11.1,15.5)	12.3 (10.0,15.1)	12.4 (9.8,15.6)	12.0 (8.9,15.7)	11.6 (8.5,15.2)	12.2 (9.6,15.6)	11.6 (9.2,14.9)	-2.2 (-4.5,0.2)
	Both	19.2 (15.4,23.4)	18.8 (15.3,22.9)	18.4 (15.0,22.3)	18.2 (14.8,22.1)	17.9 (14.5,21.7)	18.0 (14.8,21.7)	17.8 (15.0,21.3)	17.2 (14.7,20.3)	16.7 (14.4,19.4)	16.2 (14.0,18.8)	15.5 (13.4,18.0)	14.8 (12.6,17.5)	14.7 (12.4,17.6)	13.9 (11.5,16.9)	13.7 (11.2,16.7)	13.7 (11.1,17.1)	13.1 (10.6,16.4)	-2.4 (-4.3,-0.3)
Contra Costa County, CA	Male	16.7 (14.7,19.3)	16.3 (14.3,18.8)	15.9 (13.9,18.3)	15.6 (13.6,18.1)	15.2 (13.2,17.8)	15.3 (13.3,17.9)	14.4 (12.6,16.5)	13.7 (12.1,15.8)	13.3 (11.7,15.1)	12.7 (11.1,14.7)	12.5 (11.0,14.2)	11.2 (9.8,12.8)	10.8 (9.4,12.5)	10.5 (8.9,12.3)	10.2 (8.0,12.7)	11.1 (9.2,13.2)	10.5 (8.8,12.7)	-2.9 (-4.4,-1.4)
	Female	12.6 (10.3,15.6)	12.4 (10.4,14.9)	12.1 (10.4,14.4)	11.3 (9.6,13.5)	11.3 (9.7,13.5)	11.0 (9.4,13.1)	11.0 (9.5,12.8)	10.8 (9.4,12.4)	9.9 (8.7,11.4)	9.8 (8.6,11.1)	9.5 (8.4,10.7)	9.1 (7.8,10.6)	8.7 (7.1,10.4)	8.8 (6.9,10.9)	8.3 (6.3,10.5)	8.3 (6.8,10.2)	8.0 (6.5,9.8)	-2.8 (-4.7,-1.0)
	Both	14.6 (12.5,17.2)	14.3 (12.4,16.7)	14.0 (12.1,16.4)	13.4 (11.6,15.8)	13.2 (11.4,15.5)	13.1 (11.3,15.4)	12.7 (11.0,14.6)	12.2 (10.7,14.0)	11.6 (10.2,13.2)	11.2 (9.9,12.8)	10.9 (9.8,12.4)	10.1 (8.9,11.5)	9.7 (8.4,11.3)	9.6 (8.2,11.4)	9.2 (7.6,11.0)	9.7 (8.0,11.8)	9.2 (7.6,11.2)	-2.9 (-4.5,-1.2)
Del Norte County, CA	Male	23.1 (19.8,27.0)	22.5 (19.3,26.5)	22.2 (19.2,26.1)	21.9 (18.7,25.8)	21.4 (18.2,25.3)	21.3 (18.1,25.4)	21.1 (18.2,24.6)	20.9 (18.0,24.2)	20.9 (18.2,24.0)	20.4 (17.3,24.1)	20.0 (17.1,23.2)	19.9 (16.9,23.1)	19.6 (16.5,22.6)	20.5 (16.9,24.1)	19.9 (15.0,24.7)	21.2 (17.4,25.1)	20.3 (16.5,24.0)	-0.8 (-2.4,0.6)
	Female	22.3 (17.5,28.2)	22.3 (17.8,27.6)	22.2 (18.1,27.3)	23.2 (19.1,28.4)	22.7 (18.8,27.6)	22.4 (18.6,26.8)	22.6 (18.9,26.9)	21.3 (18.1,25.0)	19.8 (17.1,22.9)	19.6 (16.9,22.6)	20.3 (17.5,23.3)	21.1 (17.7,24.6)	21.3 (17.7,25.1)	21.2 (16.8,25.7)	21.0 (16.5,25.4)	17.9 (13.9,22.2)	17.1 (13.4,21.2)	-1.7 (-3.7,0.3)
	Both	22.7 (18.7,27.4)	22.4 (18.7,26.9)	22.2 (18.6,26.8)	22.5 (18.9,27.1)	22.1 (18.5,26.5)	21.9 (18.5,26.0)	21.9 (18.6,25.9)	21.1 (18.1,24.6)	20.3 (17.6,23.4)	20.0 (17.3,23.2)	20.2 (17.3,23.2)	20.5 (17.4,23.5)	20.4 (17.2,23.6)	20.8 (17.4,24.2)	20.5 (16.8,24.1)	19.5 (15.6,23.6)	18.7 (14.9,22.5)	-1.2 (-3.0,0.4)
El Dorado County, CA	Male	17.9 (15.1,21.2)	17.5 (14.7,20.5)	17.1 (14.3,20.0)	16.7 (14.0,19.5)	16.1 (13.3,19.0)	15.7 (12.9,18.6)	15.5 (13.1,17.9)	15.5 (13.1,17.9)	15.7 (13.5,18.0)	15.5 (13.2,18.0)	15.0 (13.0,17.3)	15.1 (13.1,17.4)	14.8 (12.8,17.0)	13.9 (11.8,16.4)	13.7 (10.9,17.1)	13.7 (11.2,16.5)	13.1 (10.8,15.8)	-2.0 (-3.6,-0.4)
	Female	15.0 (11.5,19.3)	14.9 (11.7,18.8)	14.8 (11.7,18.5)	14.9 (11.9,18.3)	15.4 (12.3,18.6)	14.5 (11.8,17.4)	14.3 (11.7,17.1)	14.0 (11.7,16.5)	14.2 (12.1,16.3)	13.3 (11.5,15.3)	13.1 (11.3,15.1)	12.6 (10.7,14.8)	12.5 (10.4,14.8)	11.5 (8.9,14.4)	10.9 (8.2,13.8)	10.9 (8.5,13.7)	10.5 (8.3,13.2)	-2.2 (-4.3,0.0)
	Both	16.5 (13.4,20.1)	16.2 (13.3,19.7)	15.9 (13.1,19.2)	15.8 (12.9,18.9)	15.7 (12.8,18.7)	15.1 (12.3,17.9)	14.9 (12.4,17.5)	14.7 (12.4,17.1)	14.9 (12.8,17.1)	14.4 (12.4,16.6)	14.0 (12.1,16.2)	13.8 (12.0,16.0)	13.6 (11.7,15.8)	12.7 (10.7,15.0)	12.3 (10.1,14.9)	12.3 (9.8,15.1)	11.8 (9.5,14.5)	-2.1 (-3.9,-0.2)
Fresno County, CA	Male	19.3 (16.4,22.3)	18.8 (16.0,21.7)	18.4 (15.6,21.2)	18.4 (15.6,21.1)	17.7 (14.9,20.6)	17.0 (14.3,19.6)	17.2 (14.7,19.6)	16.2 (14.0,18.5)	16.7 (14.6,18.9)	15.9 (13.6,18.1)	16.1 (14.3,18.1)	14.8 (13.1,16.6)	14.1 (12.4,16.0)	13.4 (11.4,15.4)	13.4 (10.3,16.0)	14.5 (12.2,16.9)	13.8 (11.6,16.1)	-2.1 (-3.6,-0.7)
	Female	11.5 (9.0,14.7)	11.5 (9.2,14.2)	11.5 (9.3,13.9)	12.2 (9.9,14.6)	12.3 (10.0,14.7)	12.1 (10.0,14.3)	12.7 (10.7,14.9)	12.0 (10.3,13.9)	11.7 (10.2,13.4)	11.3 (9.9,12.8)	11.6 (10.2,13.0)	11.5 (9.9,13.3)	11.3 (9.5,13.2)	10.3 (8.2,12.5)	10.3 (8.0,12.6)	9.4 (7.7,11.4)	9.0 (7.3,10.8)	-1.5 (-3.5,0.4)
	Both	15.3 (12.7,18.3)	15.1 (12.7,17.9)	14.9 (12.4,17.5)	15.2 (12.7,17.8)	15.0 (12.4,17.6)	14.5 (12.1,16.9)	14.9 (12.7,17.2)	14.1 (12.1,16.2)	14.2 (12.4,16.1)	13.5 (11.8,15.3)	13.8 (12.3,15.5)	13.1 (11.6,14.8)	12.7 (11.1,14.5)	11.9 (10.1,13.7)	11.8 (9.8,13.7)	11.9 (9.9,14.1)	11.3 (9.4,13.4)	-1.9 (-3.6,-0.3)
Glenn County, CA	Male	23.1 (19.9,26.9)	22.6 (19.4,26.2)	22.1 (19.0,25.6)	21.4 (18.3,24.8)	20.8 (17.7,24.3)	20.8 (17.6,24.3)	20.5 (17.8,23.4)	20.4 (17.7,23.3)	19.9 (17.4,22.4)	19.2 (16.5,22.1)	18.2 (15.7,20.8)	17.4 (14.9,20.1)	16.6 (14.2,19.2)	16.5 (13.6,19.4)	17.0 (13.3,21.1)	17.1 (13.9,20.3)	16.3 (13.2,19.4)	-2.2 (-3.7,-0.7)
	Female	18.6 (14.3,23.9)	18.4 (14.4,23.0)	18.2 (14.7,22.5)	17.9 (14.6,21.8)	18.4 (15.1,22.4)	18.5 (15.3,21.9)	18.4 (15.3,21.7)	17.5 (14.7,20.5)	17.1 (14.7,19.6)	15.9 (13.7,18.3)	15.1 (13.0,17.4)	14.8 (12.2,17.5)	14.6 (11.8,17.6)	14.7 (11.1,18.2)	14.5 (10.9,18.0)	14.1 (10.9,17.4)	13.5 (10.5,16.5)	-2.0 (-4.2,0.0)
	Both	20.8 (17.1,25.2)	20.4 (17.0,24.6)	20.1 (16.9,24.0)	19.6 (16.4,23.3)	19.6 (16.3,23.4)	19.6 (16.4,23.1)	19.4 (16.6,22.5)	18.9 (16.2,21.8)	18.5 (16.0,21.0)	17.5 (15.2,20.0)	16.6 (14.4,19.1)	16.1 (13.7,18.6)	15.6 (13.1,18.2)	15.6 (12.9,18.4)	15.7 (12.9,18.7)	15.6 (12.4,18.8)	14.9 (11.8,17.9)	-2.1 (-3.9,-0.4)
Humboldt County, CA	Male	21.4 (18.4,24.9)	20.9 (17.9,24.3)	20.5 (17.5,23.8)	19.5 (16.6,22.9)	18.8 (15.8,22.0)	18.5 (15.5,21.8)	18.3 (15.7,21.0)	18.1 (15.6,20.7)	18.2 (15.7,20.6)	17.8 (15.0,20.5)	17.0 (14.6,19.3)	16.2 (13.7,18.5)	15.5 (13.1,17.8)	15.8 (13.1,18.6)	15.9 (12.3,19.6)	17.5 (14.4,20.4)	16.8 (13.7,19.6)	-1.5 (-3.0,-0.1)
	Female	17.4 (13.9,22.3)	17.4 (14.0,21.5)	17.3 (14.1,21.0)	17.6 (14.5,21.4)	17.1 (13.9,20.7)	17.0 (14.1,20.2)	17.1 (14.2,20.1)	16.3 (13.8,18.8)	15.5 (13.3,17.5)	15.0 (12.9,17.0)	15.8 (13.5,17.8)	16.8 (14.2,19.3)	16.7 (13.9,19.4)	16.5 (13.1,19.7)	16.6 (13.2,19.9)	14.6 (11.4,17.5)	14.0 (11.1,16.8)	-1.4 (-3.5,0.5)
	Both	19.4 (16.1,23.4)	19.1 (16.1,22.8)	18.9 (15.9,22.4)	18.6 (15.5,22.1)	17.9 (14.9,21.3)	17.7 (14.8,20.9)	17.7 (15.1,20.5)	17.2 (14.6,19.7)	16.8 (14.4,19.0)	16.4 (14.1,18.5)	16.4 (14.1,18.4)	16.5 (14.2,18.7)	16.1 (13.7,18.4)	16.2 (13.6,18.6)	16.3 (13.4,19.0)	16.0 (12.9,18.9)	15.4 (12.4,18.2)	-1.4 (-3.2,0.1)
Imperial County, CA	Male	17.9 (15.0,21.4)	17.6 (14.6,20.9)	17.1 (14.1,20.2)	17.2 (14.3,20.4)	17.0 (14.0,20.0)	16.1 (13.2,19.3)	15.5 (13.1,18.0)	14.8 (12.5,17.1)	13.9 (11.8,15.9)	13.6 (11.3,16.0)	13.7 (11.6,15.7)	13.9 (11.8,16.0)	13.9 (11.8,16.1)	13.6 (11.3,16.1)	13.1 (9.8,16.5)	12.9 (10.3,15.8)	12.2 (9.8,15.0)	-2.4 (-4.2,-0.7)
	Female	11.0 (8.1,14.9)	10.9 (8.3,14.3)	10.8 (8.4,13.9)	10.5 (8.2,13.2)	10.5 (8.2,13.1)	10.7 (8.4,13.0)	10.5 (8.4,12.6)	9.7 (7.9,11.5)	9.2 (7.6,10.8)	9.1 (7.6,10.5)	8.5 (7.0,9.8)	8.8 (7.1,10.4)	8.7 (6.8,10.5)	8.3 (6.0,10.5)	7.7 (5.5,10.0)	7.4 (5.5,9.5)	7.0 (5.4,9.1)	-2.8 (-5.4,-0.5)
	Both	14.4 (11.6,18.0)	14.2 (11.5,17.5)	13.9 (11.2,16.9)	13.8 (11.2,16.7)	13.7 (11.0,16.5)	13.4 (10.8,15.9)	13.0 (10.7,15.3)	12.2 (10.1,14.2)	11.5 (9.7,13.3)	11.3 (9.5,13.1)	11.0 (9.3,12.6)	11.3 (9.5,13.1)	11.3 (9.3,13.2)	10.9 (8.9,12.9)	10.4 (8.4,12.8)	10.1 (7.9,12.6)	9.6 (7.5,12.0)	-2.5 (-4.6,-0.7)
Inyo County, CA	Male	22.4 (19.1,26.0)	21.9 (18.7,25.3)	21.4 (18.1,24.8)	21.0 (17.8,24.5)	20.2 (17.0,23.7)	20.5 (17.3,24.0)	20.4 (17.6,23.4)	19.4 (16.7,22.4)	18.5 (16.1,21.0)	17.9 (15.4,20.8)	17.4 (15.1,20.0)	16.7 (14.5,19.3)	16.5 (14.1,19.1)	15.9 (13.3,18.9)	16.4 (12.8,20.3)	15.9 (13.1,19.1)	15.2 (12.4,18.3)	-2.4 (-4.0,-0.8)
	Female	20.1 (15.4,25.4)	20.0 (15.7,24.9)	19.7 (15.9,24.1)	19.0 (15.3,23.0)	18.3 (14.8,22.4)	17.5 (14.4,21.1)	16.8 (13.9,20.2)	16.0 (13.5,18.7)	15.9 (13.8,18.5)	15.5 (13.3,17.8)	15.1 (12.9,17.5)	14.7 (12.1,17.5)	15.1 (12.1,18.3)	13.9 (10.3,17.8)	14.2 (10.7,18.0)	14.1 (11.1,17.8)	13.6 (10.7,17.1)	-2.5 (-4.7,-0.3)
	Both	21.2 (17.3,25.7)	20.9 (17.3,25.0)	20.5 (17.0,24.4)	20.0 (16.5,23.8)	19.2 (15.9,23.0)	19.0 (15.8,22.5)	18.6 (15.7,21.7)	17.7 (15.1,20.5)	17.2 (15.0,19.7)	16.7 (14.4,19.2)	16.2 (14.0,18.7)	15.7 (13.4,18.2)	15.8 (13.3,18.5)	14.9 (12.2,17.9)	15.3 (12.5,18.3)	15.0 (12.1,18.5)	14.3 (11.5,17.7)	-2.5 (-4.3,-0.6)
Kern County, CA	Male	21.5 (18.7,24.4)	21.0 (18.3,23.8)	20.5 (17.8,23.4)	20.4 (17.8,23.2)	20.2 (17.4,23.2)	20.6 (17.7,23.7)	19.9 (17.3,22.6)	19.3 (17.0,21.9)	18.9 (16.7,21.4)	18.0 (15.7,20.5)	17.7 (15.7,20.0)	17.1 (15.1,19.2)	17.1 (15.1,19.2)	16.8 (14.7,19.1)	15.7 (12.8,18.6)	15.0 (12.5,17.7)	14.3 (11.8,17.0)	-2.6 (-4.0,-1.2)
	Female	18.0 (14.7,21.9)	17.5 (14.7,20.9)	17.1 (14.5,20.1)	16.5 (14.0,19.2)	15.4 (13.1,18.0)	14.6 (12.4,17.1)	14.2 (12.3,16.6)	13.7 (12.0,15.7)	14.2 (12.6,16.1)	13.2 (11.8,14.9)	12.9 (11.4,14.5)	11.9 (10.2,13.7)	12.0 (10.1,14.0)	11.4 (9.1,13.9)	11.2 (8.7,13.7)	10.8 (8.8,13.2)	10.3 (8.4,12.7)	-3.5 (-5.3,-1.6)
	Both	19.7 (16.8,23.2)	19.3 (16.5,22.3)	18.8 (16.1,21.6)	18.4 (15.9,21.2)	17.8 (15.2,20.6)	17.5 (15.0,20.2)	17.0 (14.8,19.5)	16.4 (14.5,18.8)	16.5 (14.6,18.7)	15.5 (13.8,17.6)	15.2 (13.5,17.2)	14.4 (12.8,16.3)	14.5 (12.6,16.4)	14.0 (12.1,16.2)	13.4 (11.3,15.6)	12.9 (10.6,15.4)	12.3 (10.1,14.8)	-3.0 (-4.5,-1.4)
Kings County, CA	Male	20.1 (17.0,23.5)	19.6 (16.6,22.8)	19.1 (16.1,22.2)	19.2 (16.2,22.5)	18.7 (15.5,21.9)	18.8 (15.6,21.9)	19.2 (16.3,22.1)	18.5 (15.8,21.4)	19.0 (16.4,21.7)	18.8 (16.0,21.7)	19.3 (16.7,22.3)	17.5 (15.0,20.3)	17.5 (15.1,20.4)	16.1 (13.4,19.1)	15.2 (11.7,18.6)	15.4 (12.6,18.7)	14.7 (12.0,17.9)	-1.9 (-3.6,-0.4)
	Female	14.1 (10.6,18.2)	14.0 (10.8,17.6)	13.9 (11.0,17.2)	13.4 (10.7,16.6)	13.8 (11.0,16.9)	13.5 (10.9,16.4)	13.6 (11.0,16.3)	12.9 (10.5,15.3)	12.8 (10.7,15.0)	12.2 (10.3,14.4)	12.1 (10.2,14.3)	11.4 (9.3,13.9)	10.5 (8.3,13.1)	10.0 (7.4,12.9)	9.7 (7.1,12.7)	9.9 (7.6,12.7)	9.4 (7.3,12.0)	-2.5 (-4.8,-0.1)
	Both	17.1 (13.8,20.7)	16.8 (13.7,20.2)	16.5 (13.5,19.7)	16.3 (13.4,19.5)	16.2 (13.2,19.4)	16.1 (13.2,19.2)	16.3 (13.6,19.1)	15.7 (13.1,18.2)	15.9 (13.5,18.3)	15.4 (13.1,17.9)	15.6 (13.4,18.2)	14.4 (12.3,16.9)	13.9 (11.8,16.6)	13.0 (10.9,15.7)	12.4 (10.0,15.1)	12.6 (10.1,15.6)	12.0 (9.6,14.9)	-2.2 (-4.1,-0.2)
Lake County, CA	Male	24.3 (20.7,28.1)	23.8 (20.3,27.6)	23.4 (20.0,27.2)	23.1 (19.7,26.9)	22.7 (19.1,26.7)	22.7 (19.2,26.6)	22.6 (19.5,26.0)	21.8 (18.8,25.0)	20.9 (18.3,23.9)	19.9 (16.8,23.0)	19.1 (16.4,22.0)	18.5 (15.8,21.4)	18.9 (16.2,21.9)	18.9 (15.8,22.2)	18.9 (14.5,23.0)	18.7 (15.5,22.2)	18.0 (14.7,21.4)	-1.9 (-3.4,-0.4)
	Female	21.5 (16.8,27.1)	21.3 (17.0,26.2)	21.1 (16.9,25.7)	20.3 (16.6,24.5)	20.1 (16.4,24.4)	20.3 (16.8,24.3)	20.0 (16.6,23.7)	19.0 (16.0,22.4)	19.1 (16.4,22.2)	18.2 (15.7,20.9)	16.8 (14.4,19.5)	17.3 (14.6,20.4)	18.5 (15.5,22.0)	18.5 (14.8,22.6)	17.6 (14.1,21.6)	15.8 (12.5,19.3)	15.1 (12.0,18.5)	-2.2 (-4.1,-0.1)
	Both	22.8 (18.9,27.4)	22.5 (18.6,26.9)	22.2 (18.6,26.4)	21.7 (18.1,25.7)	21.4 (17.7,25.4)	21.5 (18.0,25.5)	21.2 (18.1,24.8)	20.4 (17.4,23.7)	20.0 (17.4,23.0)	19.0 (16.4,21.9)	17.9 (15.5,20.7)	17.9 (15.4,20.7)	18.7 (16.0,21.7)	18.7 (15.8,21.9)	18.3 (15.2,21.6)	17.2 (14.0,20.7)	16.5 (13.3,19.9)	-2.0 (-3.7,-0.3)
Lassen County, CA	Male	22.3 (19.1,26.0)	21.6 (18.4,25.1)	21.2 (18.0,24.7)	20.4 (17.3,23.8)	19.8 (16.5,23.4)	20.4 (17.1,24.1)	20.9 (17.9,24.0)	20.6 (17.7,23.6)	20.7 (18.1,23.5)	20.8 (17.7,24.0)	20.2 (17.4,23.2)	19.2 (16.5,22.2)	19.9 (17.1,23.0)	19.8 (16.6,23.3)	18.8 (14.6,23.2)	19.1 (15.7,22.9)	18.3 (15.0,22.0)	-1.2 (-2.8,0.2)
	Female	20.1 (15.5,25.4)	20.1 (16.0,25.1)	20.0 (16.1,24.5)	19.7 (16.0,24.0)	20.1 (16.3,24.3)	20.2 (16.7,24.1)	20.2 (16.8,23.8)	19.3 (16.2,22.5)	18.9 (16.3,21.9)	18.6 (16.1,21.3)	17.8 (15.3,20.6)	17.9 (15.0,21.2)	18.4 (15.1,22.0)	16.8 (12.9,21.0)	17.1 (13.1,21.3)	16.2 (12.8,20.3)	15.5 (12.2,19.3)	-1.6 (-3.8,0.5)
	Both	21.2 (17.4,25.7)	20.8 (17.3,25.1)	20.6 (17.1,24.6)	20.1 (16.6,23.9)	19.9 (16.4,23.8)	20.3 (16.9,23.9)	20.6 (17.3,23.8)	19.9 (17.0,22.9)	19.8 (17.2,22.7)	19.7 (17.0,22.6)	18.9 (16.4,21.8)	18.6 (15.9,21.5)	19.1 (16.3,22.3)	18.3 (15.2,21.6)	17.9 (14.9,21.5)	17.6 (14.3,21.6)	16.9 (13.5,20.6)	-1.4 (-3.3,0.3)
Los Angeles County, CA	Male	16.2 (14.6,18.0)	15.9 (14.5,17.5)	15.6 (14.1,17.1)	15.9 (14.5,17.5)	16.0 (14.5,17.6)	16.0 (14.5,17.6)	16.4 (14.9,17.9)	15.9 (14.5,17.4)	15.3 (14.1,16.7)	14.5 (13.1,16.0)	13.3 (12.2,14.4)	13.1 (12.1,14.3)	12.3 (11.4,13.4)	11.6 (10.6,12.8)	11.3 (9.8,12.9)	11.1 (10.0,12.5)	10.6 (9.5,12.0)	-2.7 (-3.6,-1.6)
	Female	10.2 (8.8,11.8)	10.3 (9.1,11.7)	10.4 (9.3,11.6)	10.3 (9.3,11.5)	10.7 (9.6,11.9)	10.4 (9.4,11.6)	10.0 (9.1,11.1)	9.1 (8.3,9.9)	9.0 (8.3,9.8)	8.3 (7.6,9.1)	7.8 (7.2,8.6)	7.9 (7.1,8.8)	7.6 (6.8,8.6)	6.9 (5.9,8.0)	6.7 (5.5,7.8)	6.4 (5.6,7.4)	6.1 (5.4,7.1)	-3.2 (-4.4,-1.9)
	Both	13.2 (11.7,14.8)	13.1 (11.8,14.5)	12.9 (11.7,14.3)	13.1 (11.8,14.5)	13.3 (12.0,14.7)	13.2 (11.9,14.5)	13.1 (12.0,14.4)	12.4 (11.4,13.6)	12.1 (11.1,13.2)	11.4 (10.4,12.4)	10.5 (9.7,11.4)	10.5 (9.7,11.4)	9.9 (9.1,10.9)	9.2 (8.4,10.2)	8.9 (8.1,10.0)	8.7 (7.8,9.9)	8.3 (7.4,9.5)	-2.9 (-3.9,-1.8)
Madera County, CA	Male	21.1 (18.1,24.9)	20.6 (17.7,24.3)	20.1 (17.2,23.8)	20.0 (17.1,23.7)	19.5 (16.5,23.3)	18.6 (15.8,22.4)	18.3 (15.8,21.3)	18.0 (15.6,20.9)	17.7 (15.5,20.4)	17.1 (14.6,20.2)	17.2 (14.9,20.0)	16.3 (13.9,19.1)	15.5 (13.1,18.2)	15.3 (12.6,18.6)	16.1 (12.5,20.4)	16.7 (13.9,20.1)	16.0 (13.2,19.2)	-1.8 (-3.2,-0.3)
	Female	15.4 (11.8,20.1)	15.2 (12.0,19.3)	15.0 (12.0,18.9)	15.7 (12.7,19.7)	15.2 (12.3,19.0)	15.1 (12.5,18.6)	15.2 (12.7,18.5)	14.6 (12.3,17.5)	14.0 (12.0,16.5)	13.4 (11.5,15.7)	13.8 (11.8,16.1)	12.7 (10.6,15.3)	12.2 (10.0,15.0)	11.8 (9.0,15.1)	11.8 (9.0,15.0)	11.5 (9.0,14.5)	10.9 (8.7,13.7)	-2.1 (-4.2,0.1)
	Both	18.2 (14.9,22.2)	17.9 (14.9,21.7)	17.5 (14.6,21.3)	17.8 (14.9,21.6)	17.3 (14.4,21.1)	16.9 (14.1,20.4)	16.7 (14.2,19.9)	16.3 (13.9,19.1)	15.8 (13.7,18.4)	15.2 (13.2,17.8)	15.5 (13.4,18.0)	14.5 (12.4,16.9)	13.8 (11.7,16.4)	13.5 (11.2,16.2)	13.9 (11.5,17.0)	14.0 (11.4,17.3)	13.4 (10.9,16.5)	-1.9 (-3.6,-0.1)
Marin County, CA	Male	14.8 (12.5,17.5)	14.4 (12.2,17.1)	14.0 (11.9,16.7)	13.3 (11.3,15.8)	13.0 (10.8,15.5)	13.3 (11.2,16.1)	12.3 (10.6,14.5)	11.5 (9.9,13.6)	11.1 (9.7,13.0)	10.6 (9.0,12.6)	10.2 (8.8,12.0)	10.1 (8.7,11.8)	10.2 (8.8,11.8)	9.7 (8.1,11.4)	9.5 (7.5,11.8)	9.3 (7.7,11.3)	8.9 (7.3,10.8)	-3.2 (-4.9,-1.5)
	Female	10.7 (8.0,13.8)	10.5 (8.2,13.4)	10.4 (8.2,13.1)	9.9 (7.9,12.5)	10.0 (8.0,12.5)	10.0 (8.2,12.4)	9.8 (8.1,12.0)	9.3 (7.8,11.3)	9.0 (7.7,10.8)	9.3 (8.0,11.0)	8.0 (6.8,9.3)	7.9 (6.6,9.5)	7.4 (6.0,9.1)	7.4 (5.6,9.4)	6.5 (4.7,8.5)	6.8 (5.3,8.6)	6.6 (5.2,8.3)	-3.0 (-5.4,-0.7)
	Both	12.7 (10.3,15.6)	12.4 (10.2,15.2)	12.2 (10.0,14.8)	11.6 (9.5,14.1)	11.4 (9.4,14.0)	11.7 (9.7,14.1)	11.0 (9.4,13.2)	10.4 (8.8,12.4)	10.1 (8.7,11.8)	9.9 (8.5,11.7)	9.1 (7.8,10.6)	9.0 (7.7,10.5)	8.8 (7.5,10.4)	8.5 (7.1,10.2)	8.0 (6.5,9.7)	8.1 (6.5,9.9)	7.7 (6.2,9.5)	-3.1 (-5.1,-1.2)
Mariposa County, CA	Male	20.1 (17.1,23.3)	19.7 (16.8,22.8)	19.1 (16.2,22.2)	18.7 (15.9,21.8)	17.9 (15.1,21.1)	18.6 (15.7,21.9)	17.9 (15.5,20.7)	18.1 (15.6,20.8)	17.7 (15.3,20.2)	17.4 (14.9,20.4)	17.4 (15.0,20.2)	17.2 (14.8,20.0)	16.3 (14.0,19.0)	16.4 (13.7,19.3)	15.8 (12.2,19.5)	15.9 (13.1,19.0)	15.2 (12.4,18.4)	-1.8 (-3.4,-0.1)
	Female	15.6 (11.8,20.0)	15.4 (11.9,19.3)	15.2 (12.0,18.7)	15.6 (12.6,19.1)	14.7 (11.9,18.0)	15.5 (12.8,18.7)	15.2 (12.7,18.3)	15.2 (12.7,18.0)	15.2 (12.9,17.7)	15.2 (13.0,17.7)	15.3 (13.1,17.9)	15.0 (12.4,18.1)	13.8 (11.0,17.1)	13.3 (10.0,17.3)	13.3 (9.9,17.2)	13.2 (10.4,16.4)	12.7 (10.0,15.8)	-1.3 (-3.6,1.1)
	Both	17.8 (14.5,21.5)	17.5 (14.4,20.8)	17.1 (14.2,20.4)	17.2 (14.2,20.5)	16.3 (13.4,19.6)	17.0 (14.3,20.2)	16.5 (14.0,19.4)	16.6 (14.1,19.4)	16.4 (14.1,18.9)	16.3 (14.0,18.9)	16.3 (14.0,19.1)	16.1 (13.9,18.9)	15.0 (12.7,17.9)	14.8 (12.3,17.8)	14.5 (11.9,17.5)	14.5 (11.7,17.7)	13.9 (11.2,17.1)	-1.5 (-3.4,0.4)
Mendocino County, CA	Male	22.0 (18.7,25.4)	21.5 (18.3,24.8)	21.1 (18.0,24.3)	20.4 (17.3,23.7)	19.6 (16.6,22.9)	19.5 (16.4,22.7)	19.3 (16.6,22.1)	19.0 (16.4,21.8)	18.5 (16.2,21.0)	17.6 (15.0,20.4)	17.0 (14.7,19.6)	16.1 (13.7,18.8)	16.6 (14.2,19.3)	16.4 (13.7,19.6)	16.9 (13.1,20.8)	17.3 (14.5,20.6)	16.5 (13.7,19.8)	-1.8 (-3.3,-0.3)
	Female	16.9 (12.9,21.4)	16.8 (13.1,20.8)	16.6 (13.1,20.4)	15.8 (12.7,19.3)	15.8 (12.8,19.2)	16.5 (13.6,19.6)	16.4 (13.9,19.5)	15.8 (13.6,18.5)	15.9 (13.9,18.4)	15.3 (13.3,17.7)	15.2 (13.2,17.7)	16.4 (14.1,19.3)	17.7 (15.0,20.9)	17.1 (13.9,20.8)	17.2 (13.9,20.9)	14.3 (11.5,17.7)	13.8 (11.1,17.0)	-1.3 (-3.3,0.7)
	Both	19.4 (15.8,23.3)	19.1 (15.7,22.7)	18.8 (15.5,22.3)	18.1 (14.9,21.5)	17.7 (14.7,21.0)	17.9 (15.0,21.2)	17.8 (15.2,20.8)	17.4 (15.0,20.1)	17.2 (15.0,19.7)	16.4 (14.3,19.0)	16.1 (13.9,18.5)	16.3 (14.1,18.9)	17.1 (14.9,20.0)	16.8 (14.4,19.9)	17.0 (14.4,20.2)	15.8 (13.0,19.1)	15.1 (12.4,18.4)	-1.6 (-3.3,0.1)
Merced County, CA	Male	22.0 (18.8,25.7)	21.5 (18.5,25.1)	21.1 (18.1,24.6)	21.4 (18.4,24.9)	20.4 (17.2,23.8)	20.3 (17.1,23.9)	18.7 (16.0,21.5)	17.2 (14.8,19.8)	17.0 (14.8,19.5)	16.4 (13.8,19.0)	16.1 (14.0,18.6)	15.9 (13.7,18.4)	15.8 (13.5,18.3)	15.9 (13.3,18.8)	15.7 (12.1,19.3)	16.4 (13.6,19.6)	15.7 (13.0,18.8)	-2.1 (-3.6,-0.6)
	Female	14.2 (10.8,18.4)	14.0 (10.9,17.7)	13.9 (11.1,17.4)	14.6 (11.8,18.1)	14.2 (11.4,17.5)	13.9 (11.5,16.8)	13.8 (11.5,16.5)	13.3 (11.1,15.7)	13.0 (11.2,15.2)	12.3 (10.6,14.4)	12.4 (10.6,14.4)	11.6 (9.6,13.6)	11.4 (9.3,13.6)	10.7 (8.3,13.5)	10.1 (7.6,12.8)	10.2 (8.1,12.8)	9.7 (7.8,12.2)	-2.4 (-4.5,-0.2)
	Both	18.0 (14.7,21.8)	17.7 (14.7,21.3)	17.4 (14.7,20.9)	17.9 (15.1,21.4)	17.2 (14.2,20.6)	17.0 (14.2,20.1)	16.2 (13.7,18.9)	15.2 (13.0,17.7)	15.0 (12.9,17.3)	14.3 (12.4,16.6)	14.2 (12.3,16.4)	13.7 (11.8,16.0)	13.5 (11.5,15.8)	13.3 (11.1,15.7)	12.9 (10.6,15.5)	13.3 (10.8,16.2)	12.6 (10.3,15.4)	-2.2 (-3.9,-0.5)
Modoc County, CA	Male	23.1 (19.7,26.9)	22.5 (19.2,26.3)	22.0 (18.8,25.7)	21.3 (18.1,24.9)	20.6 (17.5,24.3)	20.7 (17.5,24.6)	21.1 (18.2,24.3)	20.6 (17.8,23.5)	20.4 (17.7,23.2)	20.0 (16.9,23.1)	19.0 (16.3,22.0)	17.8 (15.2,20.8)	17.7 (15.2,20.6)	17.1 (14.2,20.5)	15.9 (11.8,19.9)	16.4 (13.5,19.9)	15.6 (12.8,19.0)	-2.5 (-4.0,-0.9)
	Female	20.7 (16.0,26.5)	20.5 (16.2,25.7)	20.3 (16.3,24.9)	20.3 (16.5,24.8)	20.3 (16.7,24.8)	20.2 (16.7,24.2)	20.1 (16.7,23.8)	19.6 (16.6,23.3)	18.9 (16.1,22.1)	18.8 (16.3,21.9)	18.2 (15.6,21.3)	17.8 (15.0,21.3)	17.9 (14.7,21.6)	17.3 (13.4,21.5)	15.4 (12.0,19.4)	14.2 (11.2,18.0)	13.6 (10.7,17.2)	-2.7 (-4.9,-0.5)
	Both	21.9 (17.9,26.6)	21.5 (17.8,25.8)	21.1 (17.6,25.3)	20.8 (17.3,24.9)	20.4 (17.1,24.6)	20.5 (17.2,24.3)	20.6 (17.6,24.0)	20.1 (17.2,23.4)	19.6 (16.9,22.6)	19.4 (16.7,22.5)	18.6 (16.1,21.7)	17.8 (15.3,20.9)	17.8 (15.1,21.0)	17.2 (14.4,20.4)	15.7 (12.8,19.1)	15.2 (12.3,18.9)	14.6 (11.7,18.1)	-2.6 (-4.4,-0.7)
Mono County, CA	Male	18.3 (15.3,21.4)	17.8 (14.9,20.9)	17.2 (14.4,20.4)	16.7 (14.0,19.8)	16.1 (13.3,19.3)	15.9 (13.1,19.1)	16.1 (13.6,18.8)	15.8 (13.5,18.5)	15.7 (13.7,18.2)	15.4 (13.1,18.1)	15.1 (13.0,17.4)	14.6 (12.6,16.9)	14.4 (12.5,16.7)	13.9 (11.6,16.4)	14.0 (10.8,17.5)	14.4 (12.0,17.4)	13.7 (11.4,16.6)	-1.8 (-3.5,-0.2)
	Female	14.9 (11.2,19.2)	14.7 (11.3,18.7)	14.4 (11.2,18.0)	13.9 (10.9,17.4)	13.7 (10.8,17.2)	13.6 (11.1,16.9)	14.0 (11.5,17.1)	13.7 (11.5,16.4)	13.8 (11.9,16.4)	13.6 (11.8,15.9)	13.2 (11.5,15.4)	12.5 (10.4,15.0)	11.7 (9.4,14.2)	10.8 (7.8,13.8)	10.6 (7.8,13.6)	10.9 (8.6,13.9)	10.4 (8.3,13.2)	-2.3 (-4.6,0.1)
	Both	16.6 (13.3,20.3)	16.2 (13.1,19.6)	15.8 (12.8,19.1)	15.3 (12.4,18.6)	14.9 (12.0,18.2)	14.8 (12.1,17.9)	15.0 (12.6,17.9)	14.7 (12.5,17.4)	14.7 (12.7,17.2)	14.5 (12.5,16.9)	14.1 (12.3,16.3)	13.5 (11.7,15.7)	13.0 (11.1,15.3)	12.3 (10.2,14.8)	12.3 (10.2,14.9)	12.6 (10.3,15.6)	12.0 (9.8,14.9)	-2.0 (-3.9,-0.1)
Monterey County, CA	Male	18.6 (15.9,21.8)	18.2 (15.6,21.2)	17.7 (15.3,20.6)	18.2 (15.7,21.3)	17.7 (15.2,20.7)	17.0 (14.6,20.0)	16.8 (14.7,19.2)	16.0 (14.0,18.4)	15.7 (13.8,17.8)	15.4 (13.3,17.9)	14.9 (13.1,16.9)	14.1 (12.3,16.1)	14.3 (12.4,16.4)	13.6 (11.5,16.0)	12.9 (10.2,16.0)	12.7 (10.4,15.5)	12.1 (10.0,14.9)	-2.7 (-4.2,-1.1)
	Female	12.0 (9.4,15.5)	11.9 (9.5,15.0)	11.7 (9.5,14.6)	11.9 (9.8,14.7)	11.8 (9.8,14.4)	11.7 (9.8,14.0)	11.5 (9.7,13.7)	10.6 (9.0,12.5)	10.4 (9.0,12.0)	10.3 (9.0,12.0)	10.0 (8.7,11.6)	9.1 (7.6,10.8)	8.4 (6.8,10.1)	7.7 (5.9,9.8)	7.0 (5.1,9.2)	7.6 (6.0,9.7)	7.3 (5.7,9.3)	-3.1 (-5.3,-1.0)
	Both	15.2 (12.7,18.5)	15.0 (12.5,18.0)	14.6 (12.3,17.6)	15.0 (12.7,17.9)	14.7 (12.5,17.5)	14.3 (12.2,16.9)	14.1 (12.2,16.4)	13.2 (11.4,15.4)	13.0 (11.3,14.9)	12.8 (11.2,14.8)	12.4 (10.9,14.2)	11.5 (10.0,13.3)	11.3 (9.7,13.2)	10.6 (8.9,12.6)	9.9 (8.1,12.1)	10.1 (8.2,12.6)	9.6 (7.8,12.0)	-2.9 (-4.6,-1.1)
Napa County, CA	Male	19.8 (17.1,23.3)	19.3 (16.6,22.6)	18.8 (16.1,22.0)	18.8 (16.0,22.0)	18.5 (15.7,21.9)	18.5 (15.7,22.0)	17.8 (15.3,20.6)	16.3 (14.0,18.9)	15.1 (13.0,17.4)	14.4 (12.2,16.9)	13.4 (11.5,15.4)	13.5 (11.6,15.5)	13.8 (11.8,15.8)	12.9 (10.8,15.2)	12.7 (9.8,15.6)	12.6 (10.3,15.1)	12.0 (9.8,14.3)	-3.1 (-4.7,-1.7)
	Female	15.4 (11.9,20.0)	15.2 (12.0,19.2)	14.9 (12.0,18.5)	14.0 (11.4,17.3)	13.8 (11.3,17.1)	13.3 (10.8,16.2)	13.0 (10.7,15.8)	12.3 (10.2,14.7)	11.8 (10.0,13.9)	11.5 (9.8,13.3)	10.3 (8.7,11.9)	10.2 (8.3,12.0)	9.9 (7.9,11.8)	9.3 (7.0,11.6)	8.6 (6.4,11.0)	9.0 (7.0,11.2)	8.6 (6.7,10.7)	-3.6 (-5.8,-1.5)
	Both	17.6 (14.5,21.5)	17.2 (14.3,20.7)	16.8 (14.0,20.1)	16.3 (13.6,19.6)	16.1 (13.5,19.4)	15.9 (13.3,19.0)	15.4 (13.0,18.2)	14.3 (12.1,16.7)	13.5 (11.5,15.6)	12.9 (11.1,15.0)	11.8 (10.1,13.7)	11.8 (10.0,13.7)	11.8 (9.9,13.8)	11.1 (9.2,13.2)	10.6 (8.6,12.8)	10.8 (8.6,13.1)	10.3 (8.2,12.5)	-3.4 (-5.2,-1.6)
Nevada County, CA	Male	19.7 (16.6,22.8)	19.3 (16.3,22.3)	18.9 (15.9,21.9)	18.0 (15.1,21.0)	17.2 (14.3,20.0)	17.1 (14.1,20.1)	16.8 (14.4,19.2)	16.0 (13.7,18.3)	15.2 (13.2,17.4)	14.7 (12.5,17.2)	13.6 (11.8,15.8)	13.6 (11.7,15.9)	14.2 (12.3,16.5)	14.0 (11.8,16.7)	13.7 (10.7,16.9)	12.8 (10.4,15.5)	12.2 (10.0,14.8)	-3.0 (-4.6,-1.4)
	Female	15.5 (11.9,20.2)	15.5 (12.1,19.5)	15.4 (12.2,18.9)	14.5 (11.5,17.7)	14.6 (11.6,17.7)	13.8 (11.3,16.6)	13.8 (11.5,16.5)	14.6 (12.3,17.1)	14.8 (12.7,17.2)	14.9 (13.0,17.3)	14.3 (12.4,16.5)	13.5 (11.5,16.0)	12.8 (10.5,15.4)	11.5 (9.0,14.5)	10.4 (7.9,13.4)	10.5 (8.2,13.2)	10.0 (7.9,12.6)	-2.7 (-4.8,-0.6)
	Both	17.6 (14.2,21.3)	17.3 (14.2,20.8)	17.1 (14.1,20.4)	16.2 (13.3,19.3)	15.9 (12.9,18.8)	15.4 (12.8,18.2)	15.3 (13.0,17.8)	15.3 (13.0,17.7)	15.0 (13.0,17.3)	14.8 (12.9,17.1)	14.0 (12.1,16.2)	13.6 (11.7,15.9)	13.5 (11.5,15.8)	12.8 (10.7,15.3)	12.0 (9.9,14.6)	11.6 (9.3,14.3)	11.1 (8.9,13.7)	-2.9 (-4.7,-1.0)
Orange County, CA	Male	15.7 (13.8,18.0)	15.4 (13.6,17.5)	15.0 (13.2,17.1)	14.8 (13.1,16.9)	14.8 (13.0,16.7)	14.2 (12.4,16.1)	13.4 (11.8,15.1)	13.4 (11.9,15.0)	12.1 (10.8,13.6)	12.0 (10.7,13.6)	10.6 (9.5,11.8)	10.7 (9.6,11.8)	10.0 (8.9,11.2)	10.1 (8.9,11.5)	9.4 (7.6,11.1)	9.6 (8.2,11.3)	9.2 (7.8,10.8)	-3.4 (-4.7,-1.9)
	Female	12.4 (10.2,15.0)	12.2 (10.4,14.3)	12.0 (10.4,13.9)	11.9 (10.4,13.7)	11.0 (9.5,12.7)	10.2 (8.9,11.7)	9.6 (8.4,11.1)	8.7 (7.7,9.9)	8.4 (7.5,9.4)	8.5 (7.7,9.5)	8.4 (7.6,9.4)	8.2 (7.1,9.4)	7.8 (6.6,9.1)	7.3 (5.9,9.0)	7.0 (5.4,8.7)	6.8 (5.7,8.2)	6.5 (5.4,7.8)	-4.0 (-5.6,-2.2)
	Both	14.1 (12.0,16.4)	13.8 (12.0,15.8)	13.5 (11.9,15.4)	13.3 (11.7,15.3)	12.8 (11.3,14.7)	12.1 (10.7,13.9)	11.5 (10.1,13.0)	11.0 (9.7,12.4)	10.2 (9.1,11.5)	10.2 (9.2,11.4)	9.5 (8.6,10.5)	9.4 (8.5,10.5)	8.9 (7.9,10.0)	8.7 (7.6,10.0)	8.2 (6.9,9.5)	8.2 (6.9,9.8)	7.8 (6.6,9.3)	-3.7 (-5.1,-2.1)
Placer County, CA	Male	17.4 (14.8,20.4)	16.9 (14.5,19.9)	16.5 (14.1,19.5)	16.1 (13.7,19.0)	15.3 (13.0,18.3)	15.1 (12.8,18.2)	14.8 (12.8,17.3)	14.4 (12.4,16.9)	14.1 (12.2,16.2)	13.8 (11.8,16.2)	13.0 (11.3,15.1)	13.0 (11.2,15.0)	12.7 (11.0,14.7)	12.2 (10.3,14.5)	11.8 (9.2,14.6)	11.6 (9.7,14.0)	11.1 (9.1,13.4)	-2.8 (-4.4,-1.3)
	Female	14.7 (11.3,18.7)	14.5 (11.5,18.1)	14.3 (11.5,17.6)	13.7 (11.1,16.8)	13.4 (11.0,16.6)	12.5 (10.3,15.3)	12.2 (10.1,14.8)	12.1 (10.2,14.5)	12.5 (10.7,14.7)	12.1 (10.4,14.0)	11.9 (10.3,13.8)	11.7 (10.0,13.7)	11.3 (9.5,13.3)	10.4 (8.0,12.8)	10.0 (7.6,12.4)	10.0 (8.1,12.4)	9.6 (7.8,11.9)	-2.6 (-4.6,-0.6)
	Both	16.0 (13.1,19.4)	15.7 (13.0,19.0)	15.4 (12.8,18.5)	14.8 (12.4,17.9)	14.4 (12.0,17.4)	13.8 (11.5,16.6)	13.5 (11.4,16.1)	13.3 (11.2,15.7)	13.3 (11.4,15.4)	12.9 (11.1,15.0)	12.5 (10.8,14.4)	12.3 (10.7,14.2)	12.0 (10.4,13.9)	11.3 (9.6,13.2)	10.9 (9.0,13.1)	10.8 (8.9,13.2)	10.3 (8.5,12.6)	-2.7 (-4.5,-1.0)
Plumas County, CA	Male	20.0 (17.1,23.3)	19.5 (16.6,22.9)	19.1 (16.0,22.5)	18.5 (15.5,21.9)	17.8 (14.9,21.5)	18.5 (15.4,22.1)	19.2 (16.4,22.3)	19.2 (16.4,22.2)	18.9 (16.3,21.7)	18.5 (15.6,21.6)	17.5 (15.0,20.2)	16.6 (14.1,19.3)	16.8 (14.3,19.5)	16.6 (13.8,19.7)	15.9 (12.3,19.9)	16.1 (13.3,19.4)	15.3 (12.6,18.6)	-1.7 (-3.3,-0.2)
	Female	18.0 (14.0,23.0)	17.8 (14.2,22.2)	17.6 (14.2,21.8)	17.0 (13.7,21.1)	16.9 (13.5,20.9)	16.9 (13.9,20.6)	17.0 (14.0,20.6)	16.7 (13.9,19.9)	16.5 (14.1,19.3)	16.6 (14.2,19.2)	15.7 (13.3,18.3)	15.4 (12.6,18.4)	16.1 (12.8,19.5)	16.0 (12.0,20.0)	16.0 (12.1,20.1)	16.3 (12.9,20.4)	15.7 (12.5,19.7)	-0.8 (-3.0,1.1)
	Both	19.0 (15.6,23.1)	18.7 (15.5,22.5)	18.3 (15.2,22.0)	17.7 (14.6,21.5)	17.3 (14.2,21.2)	17.7 (14.7,21.4)	18.1 (15.3,21.3)	17.9 (15.2,21.0)	17.7 (15.1,20.5)	17.5 (15.1,20.3)	16.6 (14.2,19.2)	16.0 (13.5,18.7)	16.4 (13.8,19.4)	16.3 (13.4,19.4)	16.0 (13.1,19.3)	16.2 (13.1,19.8)	15.5 (12.5,19.2)	-1.2 (-3.2,0.4)
Riverside County, CA	Male	19.8 (17.1,22.5)	19.2 (16.6,21.8)	18.7 (16.3,21.3)	18.1 (15.6,20.5)	17.7 (15.3,20.3)	17.2 (14.8,19.7)	16.6 (14.5,18.8)	15.9 (14.0,18.0)	14.9 (13.2,16.7)	14.5 (12.6,16.4)	14.1 (12.6,15.6)	14.5 (13.0,16.1)	14.5 (13.0,16.1)	14.6 (12.9,16.3)	14.5 (12.0,16.6)	13.8 (11.8,15.8)	13.1 (11.2,15.1)	-2.6 (-3.9,-1.3)
	Female	15.2 (12.3,18.4)	15.1 (12.6,17.8)	15.0 (12.8,17.5)	15.3 (13.0,17.6)	14.9 (12.8,17.2)	14.1 (12.3,16.1)	13.2 (11.6,15.0)	12.1 (10.8,13.7)	11.7 (10.4,13.0)	12.1 (10.9,13.4)	12.1 (10.9,13.3)	11.7 (10.3,13.1)	11.7 (10.1,13.4)	11.6 (9.6,13.5)	10.8 (8.7,12.8)	10.2 (8.6,11.9)	9.7 (8.2,11.4)	-2.8 (-4.5,-1.2)
	Both	17.4 (14.8,20.3)	17.1 (14.7,19.8)	16.9 (14.5,19.2)	16.6 (14.3,19.0)	16.3 (14.0,18.7)	15.6 (13.5,17.9)	14.9 (13.0,16.8)	14.0 (12.4,15.8)	13.3 (11.8,14.8)	13.3 (11.8,14.8)	13.1 (11.8,14.4)	13.1 (11.8,14.5)	13.1 (11.7,14.6)	13.1 (11.5,14.7)	12.6 (11.0,14.3)	12.0 (10.2,13.9)	11.4 (9.7,13.2)	-2.7 (-4.1,-1.3)
Sacramento County, CA	Male	19.2 (16.6,22.1)	18.7 (16.2,21.4)	18.3 (15.9,20.9)	18.2 (15.7,20.8)	17.9 (15.3,20.6)	17.3 (14.8,19.9)	16.5 (14.4,18.9)	16.3 (14.3,18.5)	16.2 (14.4,18.2)	16.0 (14.1,18.2)	15.4 (13.8,17.2)	14.6 (13.0,16.3)	13.7 (12.1,15.5)	13.8 (12.0,15.7)	13.2 (10.8,15.9)	14.6 (12.5,16.8)	13.9 (11.9,16.0)	-2.0 (-3.4,-0.8)
	Female	15.1 (12.2,18.6)	15.0 (12.5,18.0)	14.9 (12.5,17.5)	15.2 (12.9,17.8)	15.0 (12.7,17.4)	15.1 (13.1,17.3)	15.3 (13.4,17.4)	13.7 (12.1,15.4)	13.3 (12.0,14.8)	12.7 (11.3,14.1)	11.9 (10.6,13.3)	11.8 (10.1,13.4)	12.2 (10.3,14.1)	11.8 (9.5,14.0)	11.9 (9.4,14.2)	12.0 (10.1,14.0)	11.4 (9.7,13.3)	-1.7 (-3.5,0.0)
	Both	17.1 (14.5,20.2)	16.8 (14.4,19.6)	16.6 (14.2,19.2)	16.7 (14.3,19.2)	16.4 (14.0,18.9)	16.2 (13.9,18.5)	15.9 (13.9,18.1)	15.0 (13.2,16.9)	14.7 (13.2,16.5)	14.3 (12.8,16.0)	13.6 (12.2,15.1)	13.2 (11.7,14.7)	13.0 (11.3,14.5)	12.8 (11.0,14.5)	12.6 (10.7,14.4)	13.2 (11.3,15.4)	12.6 (10.8,14.7)	-1.9 (-3.4,-0.4)
San Benito County, CA	Male	18.5 (15.3,21.9)	18.1 (15.2,21.4)	17.8 (14.9,20.9)	18.0 (15.1,21.1)	16.9 (14.0,20.1)	16.6 (13.9,19.8)	16.2 (13.9,18.7)	15.0 (12.8,17.3)	14.9 (12.9,17.1)	14.8 (12.6,17.3)	14.2 (12.2,16.5)	13.9 (11.8,16.3)	13.6 (11.5,16.0)	12.7 (10.4,15.4)	12.6 (9.4,16.3)	13.2 (10.8,16.2)	12.6 (10.2,15.5)	-2.4 (-4.0,-0.6)
	Female	11.5 (8.4,15.4)	11.4 (8.6,14.9)	11.4 (8.7,14.6)	11.8 (9.3,14.9)	11.1 (8.8,13.9)	11.0 (8.9,13.5)	11.1 (9.1,13.4)	10.4 (8.6,12.4)	10.2 (8.6,12.0)	10.2 (8.7,11.9)	10.0 (8.4,11.6)	9.4 (7.6,11.3)	9.2 (7.3,11.3)	8.9 (6.7,11.5)	8.0 (5.9,10.5)	8.0 (6.1,10.3)	7.6 (5.9,9.9)	-2.6 (-5.0,0.0)
	Both	14.9 (11.9,18.4)	14.7 (11.9,18.0)	14.5 (11.8,17.6)	14.8 (12.1,18.0)	14.0 (11.3,16.9)	13.8 (11.3,16.5)	13.6 (11.4,16.0)	12.6 (10.7,14.8)	12.5 (10.8,14.5)	12.5 (10.7,14.5)	12.1 (10.3,14.0)	11.6 (9.8,13.6)	11.3 (9.4,13.4)	10.8 (8.9,13.0)	10.2 (8.2,12.8)	10.5 (8.4,13.2)	10.0 (8.0,12.7)	-2.5 (-4.4,-0.4)
San Bernardino County, CA	Male	21.0 (18.5,24.0)	20.5 (18.1,23.3)	20.0 (17.6,22.7)	19.5 (17.2,22.3)	19.2 (16.8,22.0)	19.6 (17.2,22.4)	18.3 (16.2,20.7)	17.2 (15.4,19.4)	16.0 (14.3,17.9)	16.1 (14.3,18.3)	16.0 (14.3,17.7)	16.8 (15.3,18.4)	16.3 (14.8,17.9)	16.0 (14.4,17.8)	15.2 (12.9,17.7)	13.5 (11.7,15.7)	12.8 (11.1,15.0)	-3.1 (-4.3,-1.8)
	Female	16.3 (13.7,19.5)	16.2 (13.9,19.0)	16.0 (13.9,18.5)	16.3 (14.2,18.9)	15.8 (13.8,18.3)	15.5 (13.6,17.8)	14.2 (12.6,16.1)	13.0 (11.6,14.5)	12.6 (11.4,14.0)	12.3 (11.2,13.6)	12.0 (10.8,13.2)	11.8 (10.5,13.3)	12.2 (10.6,13.9)	11.5 (9.6,13.6)	10.9 (8.9,13.1)	10.1 (8.5,11.9)	9.6 (8.2,11.3)	-3.3 (-4.8,-1.8)
	Both	18.6 (16.2,21.6)	18.3 (16.0,21.0)	17.9 (15.7,20.6)	17.9 (15.7,20.6)	17.5 (15.3,20.1)	17.5 (15.4,20.1)	16.2 (14.3,18.3)	15.1 (13.5,16.9)	14.3 (12.8,15.9)	14.2 (12.7,15.8)	13.9 (12.7,15.3)	14.3 (13.0,15.7)	14.2 (12.8,15.7)	13.7 (12.2,15.4)	13.0 (11.5,14.8)	11.8 (10.1,13.7)	11.2 (9.6,13.1)	-3.2 (-4.5,-1.8)
San Diego County, CA	Male	15.8 (13.9,18.0)	15.4 (13.6,17.5)	15.1 (13.2,17.1)	14.9 (13.0,16.9)	15.5 (13.6,17.7)	14.3 (12.5,16.4)	14.5 (12.7,16.4)	14.9 (13.3,16.8)	13.5 (12.1,15.0)	12.9 (11.4,14.5)	12.3 (11.1,13.6)	11.9 (10.7,13.1)	11.4 (10.3,12.7)	11.9 (10.5,13.3)	11.4 (9.6,13.3)	11.1 (9.4,12.7)	10.5 (9.0,12.1)	-2.5 (-3.8,-1.3)
	Female	13.5 (11.4,15.7)	13.1 (11.3,15.0)	12.6 (11.1,14.5)	11.7 (10.1,13.4)	10.8 (9.3,12.6)	10.3 (9.0,12.0)	9.8 (8.6,11.3)	10.3 (9.2,11.6)	10.0 (9.0,11.1)	10.2 (9.3,11.3)	9.9 (9.0,10.9)	9.3 (8.3,10.5)	8.7 (7.6,10.1)	8.5 (7.1,10.1)	8.1 (6.5,9.8)	8.2 (6.9,9.5)	7.8 (6.6,9.1)	-3.4 (-4.7,-1.9)
	Both	14.6 (12.7,16.7)	14.2 (12.5,16.2)	13.8 (12.1,15.7)	13.2 (11.6,15.1)	13.1 (11.4,15.1)	12.3 (10.7,14.1)	12.1 (10.6,13.8)	12.6 (11.2,14.1)	11.7 (10.5,13.0)	11.5 (10.3,12.8)	11.1 (10.1,12.2)	10.6 (9.6,11.7)	10.1 (9.0,11.3)	10.2 (9.0,11.5)	9.7 (8.4,11.1)	9.6 (8.2,11.1)	9.2 (7.8,10.6)	-2.9 (-4.2,-1.6)
San Francisco County, CA	Male	16.4 (14.1,19.2)	15.9 (13.6,18.6)	15.4 (13.2,17.9)	14.6 (12.5,17.2)	14.7 (12.5,17.2)	14.7 (12.5,17.2)	14.0 (12.0,16.1)	14.2 (12.2,16.4)	13.7 (11.8,15.8)	12.4 (10.6,14.5)	11.7 (10.1,13.6)	10.9 (9.4,12.7)	11.1 (9.7,13.0)	10.6 (9.1,12.6)	10.2 (8.3,12.7)	9.3 (7.8,11.6)	8.9 (7.4,11.1)	-3.8 (-5.3,-2.1)
	Female	11.5 (9.0,15.0)	11.3 (9.1,14.4)	11.0 (8.9,13.7)	11.1 (9.1,13.7)	11.5 (9.4,14.0)	10.9 (8.9,13.0)	11.0 (9.1,13.2)	12.0 (10.1,14.2)	10.7 (9.1,12.6)	9.3 (8.0,11.0)	8.6 (7.3,10.1)	7.6 (6.2,9.2)	6.3 (5.0,8.1)	6.0 (4.4,8.1)	6.0 (4.4,8.2)	6.7 (5.3,8.8)	6.4 (5.1,8.4)	-3.7 (-5.8,-1.2)
	Both	13.9 (11.6,17.1)	13.5 (11.4,16.4)	13.1 (11.1,15.8)	12.8 (10.8,15.4)	13.1 (11.0,15.6)	12.7 (10.7,15.0)	12.5 (10.5,14.6)	13.1 (11.1,15.2)	12.2 (10.4,14.1)	10.8 (9.3,12.6)	10.1 (8.7,11.8)	9.2 (7.9,10.9)	8.7 (7.5,10.3)	8.2 (7.0,10.0)	8.1 (6.7,10.0)	8.0 (6.6,10.1)	7.6 (6.2,9.7)	-3.7 (-5.5,-1.7)
San Joaquin County, CA	Male	21.9 (19.0,25.3)	21.5 (18.7,24.9)	21.1 (18.5,24.5)	20.9 (18.3,24.2)	20.1 (17.6,23.7)	19.6 (17.0,23.1)	18.5 (16.3,21.5)	17.8 (15.8,20.5)	18.1 (16.1,20.6)	18.0 (15.7,20.8)	18.0 (16.0,20.5)	17.2 (15.2,19.6)	17.0 (15.1,19.4)	17.0 (14.7,19.7)	16.4 (13.3,19.9)	16.7 (14.1,19.6)	15.9 (13.4,18.8)	-2.0 (-3.4,-0.7)
	Female	15.9 (12.7,19.9)	15.7 (13.0,19.1)	15.5 (12.8,18.6)	15.3 (12.9,18.5)	15.3 (13.0,18.5)	14.7 (12.7,17.5)	14.2 (12.3,16.7)	14.6 (12.8,17.0)	14.4 (12.8,16.6)	13.6 (12.1,15.6)	13.3 (11.8,15.2)	12.4 (10.4,14.6)	12.0 (9.9,14.3)	11.6 (8.9,14.3)	11.5 (8.7,14.3)	11.9 (9.7,14.4)	11.4 (9.4,13.7)	-2.1 (-4.0,-0.2)
	Both	18.8 (15.9,22.5)	18.5 (15.8,21.7)	18.2 (15.6,21.4)	18.1 (15.5,21.4)	17.7 (15.3,21.1)	17.1 (14.9,20.3)	16.3 (14.3,19.1)	16.2 (14.3,18.6)	16.2 (14.4,18.6)	15.8 (14.0,18.0)	15.6 (13.9,17.8)	14.8 (13.0,16.9)	14.5 (12.5,16.6)	14.2 (12.1,16.6)	13.9 (11.8,16.4)	14.3 (11.9,17.0)	13.6 (11.3,16.2)	-2.0 (-3.7,-0.5)
San Luis Obispo County, CA	Male	17.3 (14.8,20.2)	16.9 (14.4,19.6)	16.5 (14.0,19.1)	16.6 (14.2,19.2)	16.4 (13.9,19.1)	16.5 (14.0,19.3)	16.6 (14.3,19.1)	16.1 (13.9,18.5)	15.7 (13.7,17.8)	15.1 (13.1,17.6)	15.0 (13.1,17.3)	14.0 (12.2,16.2)	14.5 (12.7,16.7)	13.8 (11.8,16.2)	12.6 (10.1,15.7)	12.3 (10.2,14.7)	11.7 (9.6,14.0)	-2.4 (-4.0,-0.8)
	Female	14.9 (11.7,18.7)	14.7 (11.8,18.2)	14.6 (11.9,17.8)	13.6 (11.1,16.6)	13.0 (10.5,15.7)	13.1 (10.8,15.8)	12.5 (10.4,14.9)	11.7 (9.9,13.8)	11.6 (10.0,13.4)	11.5 (10.0,13.3)	10.6 (9.2,12.3)	9.9 (8.3,11.8)	9.1 (7.3,11.1)	8.7 (6.6,11.1)	7.9 (5.7,10.3)	8.8 (6.9,10.9)	8.4 (6.6,10.5)	-3.6 (-5.7,-1.4)
	Both	16.1 (13.3,19.3)	15.8 (13.1,18.9)	15.5 (13.0,18.3)	15.1 (12.6,17.9)	14.7 (12.2,17.4)	14.8 (12.4,17.4)	14.5 (12.3,17.0)	13.8 (11.9,16.1)	13.6 (11.8,15.6)	13.3 (11.6,15.4)	12.7 (11.1,14.7)	11.9 (10.3,13.8)	11.8 (10.1,13.7)	11.2 (9.5,13.2)	10.2 (8.3,12.3)	10.5 (8.5,12.8)	10.0 (8.1,12.2)	-3.0 (-4.7,-1.0)
San Mateo County, CA	Male	16.3 (14.0,19.1)	15.9 (13.6,18.6)	15.5 (13.1,18.1)	15.1 (12.8,17.7)	14.9 (12.5,17.6)	14.6 (12.2,17.2)	13.8 (11.9,15.9)	13.1 (11.3,15.1)	12.9 (11.2,14.7)	11.9 (10.2,13.8)	11.3 (9.9,12.9)	10.6 (9.2,12.2)	10.8 (9.5,12.5)	10.1 (8.6,11.8)	9.8 (7.9,12.1)	9.3 (7.7,11.3)	8.9 (7.3,10.9)	-3.8 (-5.3,-2.2)
	Female	10.6 (8.2,13.6)	10.4 (8.2,13.1)	10.1 (8.1,12.6)	9.9 (8.0,12.3)	9.6 (7.7,11.9)	9.2 (7.5,11.3)	9.7 (8.1,11.7)	10.2 (8.6,12.0)	9.7 (8.3,11.3)	9.0 (7.7,10.4)	8.2 (7.2,9.6)	6.8 (5.7,8.3)	5.9 (4.6,7.5)	5.7 (4.1,7.6)	5.5 (3.9,7.4)	6.2 (4.9,8.0)	6.0 (4.7,7.6)	-3.6 (-5.8,-1.3)
	Both	13.4 (11.1,16.3)	13.1 (10.9,15.8)	12.8 (10.6,15.4)	12.4 (10.4,15.0)	12.2 (10.1,14.7)	11.9 (9.9,14.2)	11.7 (9.9,13.8)	11.6 (9.9,13.5)	11.2 (9.7,12.9)	10.4 (9.0,12.0)	9.7 (8.5,11.2)	8.6 (7.5,10.1)	8.3 (7.2,9.9)	7.8 (6.6,9.5)	7.6 (6.3,9.4)	7.7 (6.3,9.6)	7.4 (6.0,9.2)	-3.7 (-5.5,-1.9)
Santa Barbara County, CA	Male	16.6 (14.2,19.4)	16.1 (13.8,18.8)	15.7 (13.4,18.4)	16.0 (13.7,18.8)	15.4 (13.1,18.2)	15.4 (13.1,18.2)	15.4 (13.4,17.9)	14.5 (12.7,16.8)	14.0 (12.2,16.1)	13.3 (11.4,15.5)	12.9 (11.2,14.9)	12.1 (10.5,14.1)	12.3 (10.6,14.2)	11.9 (10.1,14.0)	11.7 (9.4,14.4)	11.8 (9.7,14.2)	11.3 (9.2,13.6)	-2.4 (-4.1,-0.9)
	Female	12.3 (9.6,15.7)	12.1 (9.6,15.2)	11.9 (9.6,14.6)	11.6 (9.4,14.2)	11.0 (8.9,13.5)	11.4 (9.4,13.9)	10.9 (9.2,13.2)	10.8 (9.1,13.0)	10.4 (8.9,12.2)	9.7 (8.4,11.4)	9.2 (7.9,10.7)	8.9 (7.4,10.6)	8.6 (7.0,10.5)	7.8 (5.8,9.9)	7.6 (5.6,9.8)	7.4 (5.8,9.4)	7.1 (5.6,8.9)	-3.4 (-5.6,-1.2)
	Both	14.4 (11.9,17.4)	14.1 (11.7,16.9)	13.8 (11.5,16.4)	13.8 (11.5,16.5)	13.1 (11.0,15.9)	13.4 (11.3,16.0)	13.1 (11.3,15.4)	12.6 (10.9,14.8)	12.2 (10.6,14.1)	11.5 (10.0,13.3)	11.0 (9.6,12.8)	10.5 (9.0,12.2)	10.4 (8.9,12.2)	9.8 (8.1,11.7)	9.6 (7.9,11.6)	9.6 (7.7,11.8)	9.2 (7.4,11.3)	-2.8 (-4.7,-1.0)
Santa Clara County, CA	Male	15.5 (13.5,17.8)	15.1 (13.1,17.3)	14.7 (12.8,16.8)	14.6 (12.6,16.8)	14.1 (12.1,16.3)	14.0 (12.1,16.2)	12.9 (11.2,14.7)	11.6 (10.1,13.3)	11.6 (10.2,13.1)	10.5 (9.2,12.2)	10.2 (9.0,11.5)	10.2 (9.0,11.5)	10.0 (8.9,11.4)	9.4 (8.1,10.9)	9.1 (7.5,11.0)	8.8 (7.3,10.5)	8.4 (7.0,10.1)	-3.9 (-5.4,-2.4)
	Female	9.9 (7.8,12.5)	9.8 (7.9,11.8)	9.6 (7.9,11.4)	9.7 (8.1,11.6)	9.5 (8.0,11.4)	8.8 (7.3,10.5)	8.7 (7.3,10.3)	8.3 (7.1,9.8)	7.9 (6.8,9.1)	7.7 (6.8,8.9)	7.5 (6.6,8.6)	7.2 (6.1,8.5)	6.6 (5.5,8.0)	6.5 (5.1,8.1)	6.0 (4.6,7.7)	6.1 (4.9,7.5)	5.8 (4.7,7.2)	-3.3 (-5.3,-1.3)
	Both	12.7 (10.6,15.0)	12.4 (10.6,14.5)	12.1 (10.3,14.1)	12.1 (10.3,14.1)	11.8 (10.0,13.8)	11.4 (9.7,13.3)	10.8 (9.2,12.5)	9.9 (8.6,11.5)	9.7 (8.5,11.1)	9.1 (8.0,10.4)	8.8 (7.8,10.1)	8.6 (7.7,9.8)	8.3 (7.3,9.6)	7.9 (6.7,9.3)	7.5 (6.3,9.0)	7.4 (6.1,9.0)	7.1 (5.8,8.6)	-3.7 (-5.3,-2.0)
Santa Cruz County, CA	Male	16.8 (14.3,19.7)	16.4 (14.1,19.2)	16.0 (13.7,18.8)	15.8 (13.5,18.6)	14.8 (12.6,17.7)	14.8 (12.6,17.7)	14.2 (12.3,16.6)	12.8 (11.1,15.0)	12.5 (10.9,14.4)	12.1 (10.3,14.3)	11.2 (9.7,12.9)	11.0 (9.4,12.7)	11.9 (10.3,13.7)	11.0 (9.3,13.1)	10.5 (8.1,13.3)	10.7 (8.7,12.9)	10.1 (8.3,12.4)	-3.2 (-4.9,-1.6)
	Female	11.9 (9.0,15.6)	11.7 (9.1,15.0)	11.6 (9.3,14.5)	11.3 (9.2,14.0)	10.7 (8.7,13.2)	10.5 (8.7,12.9)	10.4 (8.7,12.7)	9.8 (8.3,11.7)	9.7 (8.3,11.4)	10.0 (8.6,11.6)	9.5 (8.2,11.0)	8.3 (6.8,10.0)	7.9 (6.3,9.7)	7.3 (5.3,9.4)	6.6 (4.7,8.8)	7.4 (5.7,9.4)	7.1 (5.5,9.0)	-3.2 (-5.6,-1.0)
	Both	14.3 (11.6,17.6)	14.0 (11.6,17.0)	13.8 (11.5,16.6)	13.5 (11.3,16.3)	12.7 (10.6,15.5)	12.6 (10.6,15.2)	12.3 (10.5,14.6)	11.3 (9.7,13.3)	11.1 (9.6,12.9)	11.0 (9.5,12.9)	10.3 (8.9,12.0)	9.6 (8.2,11.2)	9.9 (8.4,11.6)	9.2 (7.6,10.9)	8.6 (6.9,10.6)	9.0 (7.2,11.1)	8.6 (6.9,10.7)	-3.2 (-5.2,-1.4)
Shasta County, CA	Male	22.7 (19.4,26.2)	22.2 (19.1,25.6)	21.8 (18.8,25.1)	21.5 (18.5,24.9)	21.0 (17.8,24.5)	21.2 (18.0,24.7)	21.7 (18.8,24.9)	21.1 (18.2,24.1)	20.8 (18.1,23.4)	20.4 (17.4,23.2)	19.3 (16.8,22.0)	17.5 (15.1,20.1)	17.7 (15.3,20.3)	18.0 (15.2,21.1)	18.0 (14.2,22.1)	19.2 (16.1,22.8)	18.3 (15.5,21.8)	-1.3 (-2.7,0.0)
	Female	21.9 (17.5,27.2)	21.8 (17.9,26.6)	21.7 (17.8,26.0)	20.8 (17.2,25.0)	20.3 (16.8,24.3)	19.2 (16.1,22.8)	19.2 (16.2,22.5)	17.9 (15.3,20.7)	18.1 (15.6,20.5)	18.2 (15.9,20.6)	18.3 (16.0,20.7)	18.0 (15.5,20.8)	19.4 (16.6,22.5)	18.8 (15.4,22.4)	18.0 (14.6,21.8)	16.3 (13.3,20.0)	15.7 (12.9,19.2)	-2.1 (-3.8,-0.2)
	Both	22.3 (18.7,26.6)	22.0 (18.5,26.0)	21.7 (18.3,25.6)	21.2 (17.9,24.9)	20.6 (17.3,24.4)	20.2 (17.1,23.8)	20.4 (17.4,23.7)	19.5 (16.8,22.4)	19.4 (16.8,22.0)	19.3 (16.8,21.8)	18.8 (16.5,21.2)	17.8 (15.5,20.2)	18.5 (16.1,21.2)	18.4 (15.8,21.5)	18.0 (15.2,21.4)	17.7 (14.7,21.4)	17.0 (14.2,20.5)	-1.7 (-3.2,-0.1)
Sierra County, CA	Male	21.9 (18.5,25.6)	21.4 (18.1,25.0)	21.0 (17.7,24.6)	19.8 (16.6,23.1)	19.1 (16.0,22.7)	19.5 (16.1,23.2)	19.7 (16.7,23.0)	19.2 (16.4,22.4)	19.2 (16.5,22.2)	18.9 (15.9,22.4)	17.8 (15.2,20.9)	17.6 (14.9,20.7)	17.7 (15.0,20.8)	18.3 (15.1,21.8)	18.0 (13.8,22.6)	17.4 (14.2,21.3)	16.7 (13.5,20.6)	-1.7 (-3.2,-0.1)
	Female	16.8 (12.6,21.7)	16.7 (12.9,21.1)	16.6 (13.0,20.6)	16.3 (12.9,20.2)	16.4 (13.1,20.3)	16.8 (13.7,20.5)	16.9 (13.9,20.4)	16.9 (14.1,20.3)	16.9 (14.3,20.0)	17.1 (14.7,20.1)	16.3 (13.8,19.3)	15.9 (13.2,19.3)	14.4 (11.5,18.2)	15.7 (12.0,20.2)	15.0 (11.5,19.6)	15.1 (11.7,19.5)	14.6 (11.3,18.8)	-0.9 (-3.0,1.5)
	Both	19.3 (15.5,23.5)	19.0 (15.5,22.9)	18.7 (15.3,22.5)	18.0 (14.7,21.7)	17.7 (14.6,21.5)	18.1 (15.0,21.8)	18.3 (15.3,21.7)	18.1 (15.3,21.3)	18.0 (15.4,21.1)	18.0 (15.4,21.1)	17.0 (14.5,20.0)	16.7 (14.3,19.9)	16.0 (13.4,19.3)	17.0 (14.1,20.6)	16.5 (13.4,20.2)	16.3 (12.9,20.4)	15.6 (12.4,19.7)	-1.3 (-3.1,0.6)
Siskiyou County, CA	Male	20.7 (17.5,24.2)	20.1 (17.1,23.7)	19.7 (16.7,23.2)	19.0 (16.1,22.4)	18.4 (15.4,21.9)	18.2 (15.3,21.8)	18.7 (16.2,21.7)	18.1 (15.6,21.1)	18.1 (15.6,20.8)	17.9 (15.2,20.9)	17.2 (14.7,19.9)	16.8 (14.3,19.5)	16.3 (13.8,18.9)	16.1 (13.2,19.0)	15.6 (11.8,19.2)	16.4 (13.3,19.5)	15.6 (12.6,18.6)	-1.8 (-3.3,-0.2)
	Female	17.8 (13.6,22.8)	17.6 (13.9,22.0)	17.5 (14.0,21.6)	17.6 (14.2,21.7)	17.5 (14.2,21.7)	17.3 (14.2,21.1)	17.3 (14.4,20.9)	17.0 (14.3,20.1)	16.2 (13.9,19.0)	16.5 (14.1,19.0)	16.9 (14.4,19.5)	16.8 (14.0,19.7)	16.8 (13.6,20.0)	17.2 (13.3,21.3)	16.4 (12.6,20.2)	14.9 (11.6,18.4)	14.3 (11.2,17.5)	-1.4 (-3.6,0.8)
	Both	19.2 (15.6,23.3)	18.9 (15.5,22.7)	18.6 (15.4,22.4)	18.3 (15.1,22.1)	17.9 (14.9,21.8)	17.7 (14.9,21.3)	18.0 (15.3,21.3)	17.5 (15.0,20.6)	17.1 (14.7,19.8)	17.2 (14.8,19.9)	17.0 (14.6,19.6)	16.8 (14.4,19.4)	16.5 (14.0,19.3)	16.7 (13.9,19.6)	16.0 (13.1,19.0)	15.6 (12.5,19.0)	14.9 (11.9,18.1)	-1.6 (-3.4,0.2)
Solano County, CA	Male	20.9 (18.0,24.2)	20.4 (17.5,23.5)	19.9 (17.1,22.9)	19.6 (16.8,22.7)	19.2 (16.2,22.3)	19.6 (16.5,22.8)	18.3 (15.7,21.0)	16.9 (14.5,19.3)	16.3 (14.1,18.5)	15.6 (13.2,18.0)	14.8 (12.8,17.0)	14.8 (12.7,17.1)	14.9 (12.9,17.2)	14.3 (12.0,16.8)	13.9 (10.7,17.1)	14.1 (11.6,16.9)	13.4 (11.0,16.1)	-2.8 (-4.2,-1.3)
	Female	14.6 (11.6,18.5)	14.5 (11.7,17.8)	14.3 (11.7,17.4)	13.9 (11.4,16.9)	13.8 (11.3,16.6)	13.2 (10.9,15.6)	13.6 (11.3,16.0)	12.3 (10.4,14.4)	11.8 (10.1,13.7)	12.2 (10.5,14.1)	11.2 (9.5,12.9)	11.1 (9.3,13.1)	10.9 (9.1,13.1)	10.7 (8.4,13.2)	9.9 (7.5,12.5)	10.1 (8.0,12.6)	9.7 (7.6,12.1)	-2.6 (-4.6,-0.6)
	Both	17.7 (14.8,21.0)	17.4 (14.6,20.5)	17.1 (14.4,20.1)	16.7 (14.0,19.8)	16.5 (13.7,19.4)	16.4 (13.7,19.2)	15.9 (13.5,18.4)	14.6 (12.5,16.8)	14.0 (12.1,16.0)	13.9 (11.9,15.9)	13.0 (11.1,14.9)	12.9 (11.0,14.9)	12.9 (11.0,15.1)	12.5 (10.4,14.7)	11.8 (9.8,14.3)	12.0 (9.7,14.7)	11.5 (9.3,14.1)	-2.7 (-4.3,-1.0)
Sonoma County, CA	Male	19.4 (16.9,22.6)	19.0 (16.5,22.0)	18.5 (16.0,21.4)	18.0 (15.6,20.9)	17.9 (15.3,20.9)	18.1 (15.5,21.1)	17.5 (15.3,20.0)	16.1 (14.0,18.5)	15.2 (13.3,17.3)	14.3 (12.3,16.7)	14.0 (12.3,16.0)	13.9 (12.1,15.9)	14.1 (12.4,16.0)	13.7 (11.8,15.8)	13.5 (11.0,16.4)	13.4 (11.3,16.0)	12.8 (10.7,15.3)	-2.6 (-4.0,-1.2)
	Female	15.5 (12.4,19.4)	15.2 (12.5,18.9)	14.9 (12.4,18.1)	13.0 (10.8,15.8)	13.0 (10.8,15.7)	13.0 (10.9,15.5)	12.7 (10.7,15.0)	12.0 (10.2,14.0)	12.0 (10.4,13.9)	12.6 (11.0,14.3)	11.7 (10.3,13.3)	12.0 (10.3,13.8)	12.1 (10.2,14.0)	11.5 (9.2,13.8)	10.7 (8.4,13.2)	10.3 (8.5,12.6)	9.9 (8.1,12.0)	-2.8 (-4.7,-0.9)
	Both	17.4 (14.7,20.9)	17.1 (14.5,20.2)	16.7 (14.3,19.7)	15.5 (13.2,18.4)	15.4 (13.0,18.2)	15.5 (13.2,18.2)	15.1 (12.9,17.4)	14.0 (12.1,16.2)	13.6 (11.8,15.6)	13.4 (11.7,15.4)	12.8 (11.2,14.6)	13.0 (11.4,14.7)	13.1 (11.4,14.9)	12.6 (10.8,14.5)	12.1 (10.3,14.3)	11.8 (9.9,14.3)	11.3 (9.4,13.6)	-2.7 (-4.3,-1.1)
Stanislaus County, CA	Male	23.3 (20.0,26.6)	22.8 (19.6,25.9)	22.4 (19.2,25.4)	22.6 (19.4,25.7)	21.4 (18.4,24.7)	21.6 (18.5,24.7)	19.4 (16.8,22.0)	18.0 (15.6,20.5)	17.6 (15.5,19.9)	17.2 (14.7,19.8)	17.1 (15.0,19.4)	17.5 (15.3,19.7)	17.8 (15.7,20.2)	16.9 (14.5,19.6)	16.9 (13.5,20.5)	16.2 (13.7,19.3)	15.4 (13.0,18.5)	-2.6 (-3.9,-1.2)
	Female	16.1 (12.5,20.0)	16.0 (12.7,19.3)	15.8 (12.8,18.8)	15.9 (13.0,18.8)	15.2 (12.6,17.9)	15.1 (12.7,17.6)	14.5 (12.4,16.9)	14.6 (12.8,16.7)	14.3 (12.6,16.2)	13.9 (12.2,15.6)	13.7 (12.1,15.5)	12.8 (10.9,15.1)	12.7 (10.6,15.2)	11.9 (9.4,14.9)	12.0 (9.5,15.2)	12.1 (9.9,14.9)	11.6 (9.5,14.3)	-2.1 (-3.9,-0.2)
	Both	19.7 (16.2,23.1)	19.3 (16.1,22.4)	19.0 (16.0,22.0)	19.2 (16.2,22.2)	18.3 (15.5,21.2)	18.3 (15.6,21.1)	16.9 (14.5,19.4)	16.3 (14.2,18.5)	15.9 (14.1,18.0)	15.5 (13.6,17.6)	15.4 (13.6,17.3)	15.1 (13.3,17.2)	15.2 (13.2,17.5)	14.4 (12.3,16.8)	14.4 (12.2,17.1)	14.1 (11.8,17.0)	13.5 (11.2,16.3)	-2.4 (-3.9,-0.8)
Sutter County, CA	Male	22.4 (19.1,26.2)	21.9 (18.8,25.7)	21.5 (18.3,25.3)	21.4 (18.3,25.3)	20.7 (17.5,24.5)	20.8 (17.5,24.7)	20.1 (17.3,23.4)	20.1 (17.3,23.2)	19.7 (17.0,22.6)	19.0 (16.1,22.2)	18.3 (15.7,21.1)	17.7 (15.1,20.4)	17.3 (14.8,20.1)	16.1 (13.4,19.2)	16.1 (12.2,20.0)	15.6 (12.7,19.0)	14.9 (12.1,18.1)	-2.5 (-4.3,-1.1)
	Female	19.1 (14.7,24.7)	18.8 (14.8,23.8)	18.5 (14.9,22.9)	18.0 (14.6,22.3)	18.0 (14.6,22.3)	17.2 (14.2,21.1)	17.1 (14.2,20.7)	15.8 (13.3,18.8)	14.9 (12.7,17.5)	14.0 (11.9,16.2)	13.6 (11.4,15.9)	12.8 (10.3,15.4)	13.0 (10.2,15.9)	13.1 (9.6,16.5)	12.7 (9.2,16.2)	13.2 (10.2,16.7)	12.6 (9.8,15.9)	-2.6 (-4.9,-0.6)
	Both	20.7 (16.9,25.4)	20.3 (16.9,24.5)	20.0 (16.7,24.0)	19.7 (16.4,23.7)	19.4 (16.1,23.4)	19.0 (15.9,22.7)	18.5 (15.7,22.0)	17.9 (15.3,21.0)	17.3 (14.8,20.0)	16.5 (14.0,19.0)	15.9 (13.6,18.3)	15.2 (12.8,17.8)	15.1 (12.5,17.8)	14.6 (12.0,17.5)	14.4 (11.7,17.6)	14.4 (11.5,17.8)	13.7 (10.9,17.0)	-2.6 (-4.6,-0.9)
Tehama County, CA	Male	23.5 (20.1,27.5)	23.0 (19.7,26.8)	22.6 (19.2,26.3)	21.9 (18.6,25.6)	21.5 (18.1,25.2)	22.0 (18.5,25.8)	22.2 (19.2,25.5)	22.3 (19.3,25.5)	21.9 (19.2,24.7)	21.3 (18.3,24.4)	20.0 (17.4,22.8)	19.0 (16.4,21.7)	18.9 (16.4,21.6)	18.7 (15.8,21.9)	18.8 (15.0,23.0)	19.0 (16.0,22.5)	18.2 (15.2,21.5)	-1.6 (-3.1,-0.1)
	Female	20.6 (16.0,26.2)	20.4 (16.2,25.3)	20.2 (16.4,24.9)	19.3 (15.7,23.6)	19.7 (16.1,23.9)	19.8 (16.3,23.6)	19.8 (16.6,23.5)	19.3 (16.5,22.5)	18.8 (16.4,21.6)	18.4 (16.0,21.1)	17.7 (15.2,20.3)	18.2 (15.2,21.5)	18.5 (15.2,22.1)	18.4 (14.5,22.8)	18.8 (14.9,23.1)	17.5 (14.2,21.4)	16.8 (13.6,20.4)	-1.3 (-3.2,0.8)
	Both	22.0 (18.1,26.6)	21.7 (18.0,26.1)	21.4 (17.9,25.4)	20.6 (17.1,24.6)	20.6 (17.2,24.5)	20.8 (17.5,24.5)	21.0 (18.0,24.4)	20.8 (17.9,23.9)	20.3 (17.7,23.2)	19.8 (17.3,22.5)	18.8 (16.4,21.5)	18.6 (16.0,21.3)	18.7 (15.9,21.6)	18.6 (15.6,21.9)	18.8 (15.8,22.1)	18.3 (15.1,21.9)	17.5 (14.3,20.9)	-1.4 (-3.1,0.3)
Trinity County, CA	Male	22.6 (19.3,26.0)	22.0 (18.8,25.1)	21.4 (18.3,24.6)	20.5 (17.4,23.6)	19.4 (16.4,22.6)	19.5 (16.4,22.7)	19.9 (17.1,22.6)	19.9 (17.2,22.7)	19.9 (17.5,22.6)	19.7 (16.8,22.5)	19.0 (16.4,21.6)	18.3 (15.7,21.1)	17.1 (14.6,19.8)	16.3 (13.2,19.4)	16.2 (12.2,20.3)	17.3 (14.1,20.9)	16.6 (13.4,20.1)	-2.0 (-3.5,-0.5)
	Female	20.3 (15.7,25.3)	20.0 (15.7,24.5)	19.7 (15.8,23.8)	18.9 (15.3,22.7)	18.5 (15.0,22.2)	18.8 (15.4,22.4)	18.9 (15.8,22.3)	18.4 (15.6,21.6)	18.0 (15.6,20.7)	17.8 (15.4,20.4)	17.9 (15.5,20.7)	18.4 (15.5,21.8)	18.4 (15.3,21.9)	18.2 (14.4,22.4)	18.1 (14.4,22.3)	16.3 (12.6,20.5)	15.7 (12.2,19.7)	-1.6 (-3.6,0.4)
	Both	21.5 (17.4,25.6)	21.0 (17.3,24.8)	20.5 (17.1,24.0)	19.7 (16.4,23.1)	18.9 (15.6,22.4)	19.2 (16.0,22.4)	19.4 (16.4,22.4)	19.1 (16.4,22.0)	19.0 (16.6,21.6)	18.7 (16.3,21.4)	18.5 (15.9,21.1)	18.4 (15.8,21.2)	17.8 (15.0,20.8)	17.2 (14.3,20.5)	17.2 (14.1,20.7)	16.8 (13.3,20.7)	16.1 (12.8,19.9)	-1.8 (-3.5,-0.1)
Tulare County, CA	Male	21.3 (18.1,24.8)	20.9 (17.8,24.2)	20.5 (17.4,23.9)	20.2 (17.2,23.5)	19.2 (16.3,22.4)	18.8 (15.8,21.9)	18.5 (15.8,21.2)	17.7 (15.2,20.2)	18.0 (15.7,20.4)	17.2 (14.7,19.8)	17.7 (15.5,20.1)	16.1 (14.1,18.3)	15.3 (13.3,17.5)	14.2 (11.9,16.6)	13.8 (10.7,17.0)	14.0 (11.5,16.6)	13.3 (10.9,16.0)	-2.9 (-4.6,-1.4)
	Female	14.9 (11.5,18.9)	14.5 (11.6,18.1)	14.2 (11.4,17.5)	13.3 (10.7,16.2)	13.3 (10.8,16.2)	12.7 (10.4,15.3)	13.0 (10.7,15.4)	12.6 (10.6,14.9)	12.9 (11.1,14.8)	12.3 (10.7,14.2)	12.4 (10.9,14.2)	12.1 (10.3,14.1)	11.9 (9.9,14.1)	10.9 (8.4,13.4)	10.5 (7.9,13.1)	10.0 (7.9,12.2)	9.5 (7.6,11.6)	-2.8 (-4.9,-0.8)
	Both	18.0 (14.8,21.7)	17.7 (14.6,21.0)	17.3 (14.4,20.4)	16.7 (13.9,19.8)	16.2 (13.5,19.3)	15.7 (13.1,18.6)	15.7 (13.2,18.2)	15.1 (12.9,17.5)	15.4 (13.3,17.6)	14.7 (12.8,16.8)	15.0 (13.2,17.1)	14.1 (12.3,16.0)	13.6 (11.8,15.6)	12.5 (10.6,14.6)	12.1 (10.0,14.3)	12.0 (9.7,14.4)	11.4 (9.2,13.8)	-2.9 (-4.7,-1.2)
Tuolumne County, CA	Male	21.8 (18.6,25.5)	21.4 (18.3,24.9)	21.0 (17.9,24.7)	20.6 (17.7,24.2)	20.0 (16.7,23.6)	20.6 (17.3,24.3)	20.4 (17.5,23.4)	20.8 (17.9,23.7)	20.3 (17.7,23.1)	20.1 (17.3,23.2)	20.1 (17.5,22.9)	19.6 (17.0,22.5)	19.1 (16.4,22.0)	18.7 (15.7,21.9)	18.9 (14.9,23.0)	19.0 (15.8,22.7)	18.3 (15.1,21.7)	-1.1 (-2.6,0.5)
	Female	19.1 (15.0,24.2)	19.0 (15.2,23.7)	18.9 (15.3,23.4)	18.9 (15.3,23.2)	17.9 (14.5,22.0)	18.1 (14.8,21.6)	17.9 (14.7,21.1)	17.7 (14.9,20.8)	17.4 (15.0,20.1)	17.5 (15.1,20.1)	17.4 (15.0,20.0)	16.6 (13.9,19.6)	16.4 (13.3,19.7)	15.4 (11.6,19.6)	15.5 (11.8,19.9)	15.6 (12.4,19.5)	15.1 (11.9,18.7)	-1.5 (-3.7,0.8)
	Both	20.4 (16.8,24.8)	20.2 (16.7,24.3)	20.0 (16.6,23.9)	19.7 (16.5,23.7)	18.9 (15.6,22.7)	19.3 (16.0,22.9)	19.1 (16.1,22.2)	19.2 (16.4,22.3)	18.9 (16.3,21.5)	18.8 (16.3,21.5)	18.8 (16.3,21.4)	18.1 (15.5,20.8)	17.7 (15.1,20.6)	17.1 (14.2,20.2)	17.2 (14.1,20.5)	17.3 (14.1,21.1)	16.6 (13.4,20.2)	-1.3 (-3.1,0.6)
Ventura County, CA	Male	16.6 (14.0,19.3)	16.1 (13.8,18.7)	15.7 (13.4,18.1)	16.2 (13.9,18.8)	15.8 (13.4,18.3)	16.0 (13.6,18.6)	15.8 (13.7,18.0)	15.2 (13.3,17.2)	14.5 (12.8,16.4)	13.6 (11.8,15.7)	13.0 (11.4,14.7)	11.9 (10.3,13.5)	11.8 (10.3,13.5)	11.3 (9.6,13.1)	11.2 (8.9,13.6)	11.4 (9.4,13.4)	10.8 (8.9,12.8)	-2.7 (-4.1,-1.2)
	Female	10.8 (8.4,14.0)	10.8 (8.6,13.4)	10.7 (8.6,13.0)	10.8 (8.8,13.0)	10.4 (8.6,12.5)	10.5 (8.8,12.5)	10.1 (8.5,11.9)	10.4 (8.9,12.2)	10.1 (8.7,11.6)	9.3 (8.0,10.7)	8.9 (7.7,10.3)	9.2 (7.8,10.8)	8.7 (7.1,10.4)	8.2 (6.3,10.1)	8.2 (6.4,10.2)	7.3 (5.8,9.1)	7.0 (5.5,8.6)	-2.7 (-4.8,-0.7)
	Both	13.6 (11.2,16.4)	13.4 (11.1,15.9)	13.1 (11.0,15.5)	13.4 (11.3,15.8)	13.0 (10.9,15.3)	13.2 (11.2,15.4)	12.9 (11.0,14.8)	12.8 (11.1,14.7)	12.2 (10.7,14.0)	11.4 (9.9,13.0)	10.9 (9.5,12.4)	10.5 (9.2,12.1)	10.2 (8.8,11.8)	9.7 (8.2,11.4)	9.7 (8.1,11.4)	9.3 (7.6,11.2)	8.9 (7.2,10.7)	-2.7 (-4.4,-1.1)
Yolo County, CA	Male	17.2 (14.6,20.2)	16.8 (14.3,19.7)	16.5 (13.9,19.4)	16.3 (13.7,19.3)	15.9 (13.3,18.7)	15.7 (13.1,18.6)	14.8 (12.7,17.2)	14.2 (12.1,16.5)	13.7 (11.7,15.8)	13.0 (10.9,15.3)	12.4 (10.5,14.3)	12.0 (10.1,14.0)	11.7 (9.9,13.7)	10.9 (8.9,13.2)	10.9 (8.2,13.9)	11.2 (9.0,13.5)	10.6 (8.6,12.9)	-3.0 (-4.7,-1.4)
	Female	13.4 (10.2,17.3)	13.2 (10.4,16.7)	12.9 (10.3,16.1)	12.7 (10.0,15.7)	12.6 (10.1,15.6)	12.5 (10.2,15.2)	12.5 (10.3,15.1)	11.7 (9.7,13.9)	11.1 (9.3,13.0)	10.5 (8.9,12.2)	9.7 (8.2,11.4)	9.0 (7.2,10.7)	8.8 (6.9,10.7)	8.2 (6.0,10.5)	7.8 (5.6,10.2)	8.2 (6.3,10.4)	7.9 (6.1,10.0)	-3.3 (-5.5,-1.1)
	Both	15.3 (12.5,18.7)	15.0 (12.3,18.1)	14.7 (12.1,17.6)	14.5 (11.9,17.5)	14.2 (11.7,17.1)	14.0 (11.6,16.8)	13.6 (11.4,16.2)	12.9 (10.9,15.2)	12.4 (10.5,14.4)	11.7 (9.9,13.6)	11.0 (9.4,12.8)	10.5 (8.8,12.3)	10.2 (8.5,12.1)	9.5 (7.7,11.5)	9.3 (7.5,11.4)	9.7 (7.7,11.9)	9.2 (7.3,11.4)	-3.1 (-5.0,-1.3)
Yuba County, CA	Male	24.8 (21.2,28.6)	24.2 (20.5,28.1)	23.8 (20.2,27.5)	23.6 (20.0,27.3)	22.8 (19.1,26.6)	22.9 (19.1,26.7)	22.5 (19.4,25.7)	22.1 (19.1,25.2)	21.6 (18.7,24.4)	20.6 (17.6,23.7)	19.2 (16.6,21.9)	19.0 (16.4,21.9)	19.1 (16.6,22.0)	18.5 (15.7,21.6)	18.4 (14.6,22.2)	17.9 (14.8,21.1)	17.1 (14.1,20.1)	-2.3 (-3.9,-0.9)
	Female	20.9 (16.3,26.1)	20.7 (16.6,25.5)	20.5 (16.5,25.0)	19.4 (15.6,23.7)	19.5 (15.8,23.7)	18.2 (15.0,22.0)	18.2 (15.1,21.7)	18.2 (15.3,21.2)	18.2 (15.5,20.9)	17.9 (15.4,20.5)	17.7 (15.4,20.4)	16.8 (14.3,20.0)	16.5 (13.7,20.0)	15.7 (12.1,19.8)	14.3 (10.8,18.1)	14.8 (11.6,18.2)	14.1 (11.2,17.3)	-2.5 (-4.5,-0.3)
	Both	22.8 (18.9,27.3)	22.4 (18.6,26.7)	22.1 (18.4,26.2)	21.5 (17.8,25.5)	21.1 (17.4,25.2)	20.5 (17.1,24.3)	20.3 (17.2,23.6)	20.1 (17.1,23.1)	19.8 (17.1,22.6)	19.2 (16.5,21.9)	18.4 (16.0,21.1)	17.8 (15.4,20.6)	17.8 (15.3,20.7)	17.1 (14.4,20.0)	16.3 (13.5,19.4)	16.3 (13.2,19.6)	15.6 (12.6,18.7)	-2.4 (-4.2,-0.6)
Adams County/Boulder County/Broomfield County/Jefferson County/Weld County, CO	Male	18.5 (16.6,20.5)	18.1 (16.3,19.9)	17.7 (16.0,19.4)	17.6 (16.0,19.3)	17.0 (15.3,18.6)	16.6 (15.1,18.1)	16.7 (15.3,18.0)	16.2 (15.0,17.4)	15.7 (14.7,16.8)	15.5 (14.5,16.6)	15.3 (14.4,16.1)	14.9 (14.1,15.7)	14.5 (13.7,15.5)	14.5 (13.5,15.5)	14.0 (12.6,15.4)	13.6 (12.4,14.9)	13.1 (11.9,14.3)	-2.2 (-3.1,-1.3)
	Female	16.1 (13.9,18.4)	16.0 (14.2,17.8)	15.8 (14.3,17.5)	15.3 (13.9,16.9)	15.9 (14.5,17.4)	15.7 (14.5,16.8)	15.2 (14.2,16.2)	14.6 (13.8,15.5)	14.6 (13.9,15.4)	14.1 (13.4,14.8)	13.5 (12.7,14.3)	13.2 (12.2,14.2)	12.8 (11.6,13.9)	12.2 (10.9,13.5)	11.9 (10.5,13.3)	12.1 (11.0,13.2)	11.6 (10.6,12.7)	-2.0 (-3.2,-1.0)
	Both	17.3 (15.3,19.4)	17.0 (15.3,18.8)	16.7 (15.2,18.4)	16.4 (14.9,18.1)	16.4 (15.0,17.9)	16.1 (14.7,17.4)	15.9 (14.7,17.1)	15.4 (14.4,16.4)	15.2 (14.3,16.1)	14.8 (14.0,15.6)	14.4 (13.6,15.1)	14.0 (13.2,14.9)	13.6 (12.7,14.5)	13.3 (12.3,14.4)	12.9 (11.9,14.0)	12.9 (11.7,14.1)	12.3 (11.2,13.5)	-2.1 (-3.1,-1.2)
Alamosa County, CO	Male	18.2 (15.2,21.5)	17.7 (14.9,20.9)	17.4 (14.6,20.4)	17.2 (14.4,20.3)	16.7 (13.9,19.6)	16.4 (13.7,19.5)	15.9 (13.5,18.4)	15.7 (13.4,18.2)	15.8 (13.6,18.2)	15.5 (13.0,18.1)	15.0 (12.8,17.4)	15.0 (12.8,17.4)	15.5 (13.3,17.9)	14.9 (12.3,17.7)	15.0 (11.6,18.6)	14.9 (12.3,17.8)	14.4 (11.8,17.3)	-1.5 (-3.0,0.1)
	Female	13.2 (9.8,17.6)	13.0 (9.9,16.9)	12.9 (10.1,16.4)	13.2 (10.4,16.4)	13.1 (10.5,16.1)	13.3 (10.9,16.0)	13.5 (11.1,16.1)	13.0 (10.8,15.3)	12.4 (10.5,14.5)	12.8 (10.9,14.9)	12.2 (10.4,14.3)	12.0 (9.9,14.3)	12.4 (10.0,15.0)	12.7 (9.9,15.9)	12.0 (9.3,15.2)	11.6 (9.2,14.4)	11.2 (8.9,13.9)	-1.0 (-3.3,1.3)
	Both	15.6 (12.5,19.5)	15.3 (12.4,18.9)	15.1 (12.3,18.4)	15.1 (12.4,18.3)	14.9 (12.2,17.8)	14.8 (12.3,17.6)	14.7 (12.3,17.2)	14.3 (12.1,16.7)	14.1 (12.0,16.3)	14.1 (12.0,16.4)	13.6 (11.6,15.8)	13.5 (11.5,15.7)	13.9 (11.8,16.3)	13.8 (11.6,16.3)	13.5 (11.1,16.2)	13.2 (10.7,16.1)	12.8 (10.3,15.6)	-1.3 (-3.1,0.5)
Arapahoe County, CO	Male	18.6 (16.0,21.2)	18.1 (15.7,20.5)	17.7 (15.4,20.1)	18.3 (15.9,20.7)	17.6 (15.3,20.0)	16.7 (14.6,19.1)	16.1 (14.3,18.0)	16.5 (14.8,18.2)	15.4 (14.1,16.9)	15.3 (13.9,16.8)	15.2 (14.0,16.4)	15.6 (14.4,16.9)	15.0 (13.6,16.4)	14.7 (13.2,16.4)	14.4 (12.2,16.5)	13.8 (12.0,15.7)	13.2 (11.4,15.1)	-2.1 (-3.4,-0.9)
	Female	17.1 (14.1,20.2)	16.7 (14.1,19.6)	16.4 (14.0,18.9)	16.0 (13.7,18.5)	15.1 (13.0,17.3)	13.9 (12.2,15.7)	14.1 (12.6,15.6)	14.5 (13.3,15.8)	14.3 (13.3,15.3)	14.7 (13.7,15.7)	14.8 (13.8,15.9)	14.2 (12.8,15.6)	13.3 (11.7,14.9)	12.2 (10.3,14.2)	11.2 (9.1,13.2)	9.9 (8.4,11.5)	9.5 (8.1,11.1)	-3.7 (-5.1,-2.1)
	Both	17.8 (15.1,20.7)	17.4 (14.8,20.0)	17.0 (14.7,19.4)	17.1 (14.8,19.5)	16.3 (14.2,18.6)	15.3 (13.4,17.3)	15.1 (13.5,16.8)	15.5 (14.1,17.0)	14.9 (13.7,16.1)	15.0 (13.9,16.1)	15.0 (14.0,16.1)	14.9 (13.7,16.0)	14.1 (12.8,15.5)	13.5 (11.9,15.1)	12.8 (11.2,14.4)	11.8 (10.1,13.6)	11.3 (9.7,13.1)	-2.8 (-4.2,-1.5)
Archuleta County, CO	Male	18.9 (15.9,22.1)	18.4 (15.7,21.4)	18.2 (15.5,21.1)	18.2 (15.5,21.2)	17.6 (14.8,20.6)	17.8 (15.1,20.8)	17.2 (14.9,19.8)	17.0 (14.8,19.6)	16.9 (14.8,19.3)	16.6 (14.3,19.3)	16.1 (13.9,18.6)	15.8 (13.7,18.4)	14.3 (12.2,16.8)	16.6 (14.1,19.5)	15.2 (11.9,18.7)	14.8 (12.3,17.8)	14.2 (11.7,17.2)	-1.8 (-3.3,-0.1)
	Female	16.1 (12.2,20.6)	16.0 (12.4,20.1)	16.0 (12.6,19.7)	15.8 (12.8,19.3)	16.2 (13.2,19.6)	16.6 (13.7,19.9)	15.7 (13.1,18.8)	15.2 (12.8,18.0)	15.0 (13.0,17.5)	15.0 (13.0,17.3)	14.2 (12.3,16.5)	13.9 (11.7,16.4)	11.6 (9.4,14.3)	12.8 (10.0,16.1)	11.3 (8.6,14.6)	11.6 (9.2,14.7)	11.2 (8.9,14.2)	-2.2 (-4.4,0.1)
	Both	17.4 (14.0,21.2)	17.2 (14.0,20.7)	17.1 (14.1,20.3)	17.0 (14.1,20.3)	16.9 (14.0,20.1)	17.2 (14.4,20.2)	16.4 (14.0,19.3)	16.1 (13.9,18.8)	15.9 (13.8,18.4)	15.8 (13.7,18.3)	15.1 (13.2,17.5)	14.8 (12.8,17.3)	12.9 (10.9,15.5)	14.6 (12.4,17.4)	13.2 (10.9,16.1)	13.1 (10.7,16.2)	12.7 (10.3,15.6)	-2.0 (-3.7,-0.1)
Baca County, CO	Male	22.1 (19.1,25.8)	21.5 (18.5,25.1)	21.1 (18.2,24.6)	20.9 (18.0,24.4)	20.5 (17.5,24.1)	21.2 (18.0,25.0)	20.6 (18.0,23.7)	20.6 (18.1,23.8)	20.0 (17.6,23.1)	19.4 (16.7,22.7)	18.2 (15.7,21.3)	17.9 (15.5,21.1)	17.0 (14.6,19.9)	17.5 (14.7,20.7)	17.1 (13.5,21.3)	17.4 (14.3,21.0)	16.6 (13.6,20.1)	-1.8 (-3.3,-0.2)
	Female	19.3 (15.0,24.8)	19.2 (15.3,24.1)	19.1 (15.5,23.8)	19.5 (16.0,23.9)	19.3 (15.9,23.6)	19.6 (16.4,23.7)	19.7 (16.6,23.7)	19.5 (16.6,23.3)	19.2 (16.6,22.7)	19.1 (16.6,22.4)	18.1 (15.6,21.2)	17.7 (14.7,21.2)	17.3 (14.0,21.1)	16.7 (12.9,21.2)	16.0 (12.3,20.5)	15.7 (12.3,19.8)	15.2 (11.9,19.1)	-1.5 (-3.7,0.7)
	Both	20.6 (17.0,25.1)	20.3 (16.9,24.6)	20.1 (16.9,24.1)	20.2 (17.0,24.1)	19.9 (16.8,23.8)	20.4 (17.3,24.1)	20.2 (17.3,23.7)	20.0 (17.4,23.5)	19.6 (17.1,22.9)	19.2 (16.7,22.5)	18.1 (15.7,21.3)	17.8 (15.3,20.9)	17.2 (14.6,20.5)	17.1 (14.3,20.7)	16.6 (13.6,20.1)	16.5 (13.3,20.4)	15.9 (12.8,19.6)	-1.6 (-3.4,0.2)
Bent County, CO	Male	22.3 (18.9,25.9)	21.9 (18.6,25.6)	21.6 (18.4,25.3)	21.9 (18.6,25.5)	21.7 (18.4,25.5)	22.1 (18.7,26.1)	21.7 (18.7,25.0)	22.3 (19.3,25.4)	21.9 (19.0,24.8)	21.3 (18.1,24.7)	20.3 (17.3,23.5)	20.4 (17.3,23.8)	21.0 (17.7,24.4)	22.1 (18.3,26.2)	22.8 (17.9,28.1)	22.9 (19.0,27.3)	21.9 (18.2,26.3)	-0.1 (-1.7,1.4)
	Female	17.1 (12.9,21.9)	17.2 (13.5,21.7)	17.3 (13.7,21.5)	17.7 (14.1,21.7)	18.3 (14.8,22.4)	18.3 (15.1,22.0)	18.6 (15.6,22.1)	19.2 (16.3,22.4)	18.7 (16.0,21.6)	19.2 (16.6,22.1)	19.4 (16.7,22.5)	19.0 (15.7,22.7)	19.1 (15.3,23.2)	18.8 (14.2,24.0)	18.7 (14.3,23.6)	18.0 (14.3,22.5)	17.6 (14.1,21.9)	0.2 (-2.0,2.5)
	Both	19.6 (16.0,24.0)	19.5 (16.0,23.5)	19.4 (16.0,23.2)	19.8 (16.3,23.6)	20.0 (16.6,24.0)	20.2 (16.9,23.8)	20.1 (17.2,23.5)	20.7 (17.8,23.9)	20.3 (17.6,23.2)	20.2 (17.5,23.2)	19.8 (17.0,22.9)	19.7 (16.7,22.9)	20.0 (16.8,23.7)	20.4 (16.8,24.5)	20.7 (17.2,24.9)	20.4 (16.6,24.9)	19.7 (16.1,24.1)	0.0 (-1.8,1.9)
Chaffee County, CO	Male	21.4 (18.3,24.7)	20.8 (17.8,24.1)	20.4 (17.4,23.6)	19.6 (16.7,22.7)	18.8 (16.0,22.1)	18.9 (16.0,22.0)	18.9 (16.3,21.7)	18.8 (16.3,21.5)	18.1 (15.8,20.6)	17.5 (14.9,20.4)	17.5 (15.2,20.1)	18.1 (15.7,20.7)	16.6 (14.5,19.1)	17.1 (14.5,19.9)	17.2 (13.8,21.0)	16.4 (13.7,19.5)	15.7 (13.0,18.7)	-1.9 (-3.3,-0.5)
	Female	18.8 (14.6,23.6)	18.7 (14.7,22.9)	18.7 (15.1,22.5)	19.0 (15.5,22.8)	18.8 (15.5,22.5)	19.1 (16.0,22.7)	18.4 (15.6,21.6)	16.5 (14.1,19.4)	16.1 (13.9,18.5)	15.9 (13.8,18.4)	15.6 (13.5,18.0)	15.6 (13.3,18.4)	15.8 (13.4,18.9)	14.9 (11.9,18.6)	14.7 (11.7,18.4)	14.0 (11.1,17.2)	13.5 (10.8,16.7)	-2.1 (-4.0,0.0)
	Both	20.1 (16.4,24.0)	19.8 (16.4,23.4)	19.5 (16.3,23.0)	19.3 (16.1,22.8)	18.8 (15.8,22.3)	19.0 (16.1,22.3)	18.7 (16.0,21.6)	17.6 (15.2,20.4)	17.1 (14.8,19.6)	16.7 (14.5,19.1)	16.5 (14.4,19.0)	16.8 (14.7,19.4)	16.2 (14.1,18.9)	16.0 (13.6,18.8)	15.9 (13.4,18.9)	15.2 (12.4,18.3)	14.6 (11.9,17.7)	-2.0 (-3.6,-0.2)
Cheyenne County, CO	Male	22.0 (18.6,26.0)	21.5 (18.2,25.1)	21.0 (17.8,24.7)	20.5 (17.3,24.1)	19.4 (16.2,23.1)	19.0 (15.9,22.7)	18.6 (15.9,21.6)	18.3 (15.7,21.1)	17.7 (15.3,20.3)	17.5 (14.8,20.3)	16.8 (14.5,19.5)	16.5 (14.1,19.2)	15.8 (13.5,18.6)	18.2 (15.3,21.4)	16.5 (12.8,20.6)	16.4 (13.4,19.9)	15.5 (12.6,18.9)	-2.2 (-3.9,-0.6)
	Female	18.0 (13.6,23.7)	17.8 (13.9,22.8)	17.6 (14.0,22.2)	17.8 (14.2,22.0)	17.5 (14.1,21.7)	17.5 (14.3,21.2)	17.5 (14.4,20.9)	17.2 (14.4,20.2)	16.9 (14.5,19.5)	16.6 (14.3,19.1)	16.2 (13.9,18.8)	16.5 (13.7,19.6)	16.9 (13.6,20.3)	17.0 (13.0,21.2)	15.3 (11.6,19.4)	15.3 (11.9,19.3)	14.6 (11.4,18.4)	-1.3 (-3.6,0.9)
	Both	20.0 (16.3,24.7)	19.6 (16.0,23.9)	19.3 (15.9,23.3)	19.1 (15.7,23.0)	18.5 (15.1,22.4)	18.3 (15.1,22.0)	18.0 (15.2,21.2)	17.7 (15.1,20.5)	17.3 (14.9,19.9)	17.0 (14.7,19.6)	16.5 (14.2,19.1)	16.5 (14.2,19.2)	16.3 (13.8,19.3)	17.6 (14.7,20.8)	15.9 (13.0,19.5)	15.8 (12.6,19.6)	15.1 (12.0,18.7)	-1.8 (-3.8,0.1)
Clear Creek County, CO	Male	17.3 (14.5,20.4)	16.8 (14.0,19.7)	16.4 (13.6,19.2)	15.9 (13.2,18.7)	15.6 (12.9,18.6)	15.3 (12.5,18.2)	15.6 (13.3,18.1)	14.8 (12.6,17.2)	15.2 (13.1,17.5)	14.4 (12.1,16.8)	14.3 (12.2,16.6)	13.6 (11.6,16.0)	12.3 (10.3,14.6)	12.7 (10.4,15.3)	13.7 (10.4,17.1)	13.7 (11.3,16.8)	13.1 (10.8,16.1)	-1.7 (-3.3,0.1)
	Female	15.3 (11.4,20.0)	15.1 (11.6,19.2)	14.9 (11.7,18.4)	14.6 (11.5,18.1)	14.3 (11.3,17.7)	14.4 (11.8,17.6)	13.4 (11.1,16.2)	12.2 (10.1,14.4)	11.9 (10.1,13.9)	12.1 (10.3,14.1)	11.6 (9.9,13.9)	11.8 (9.6,14.6)	11.7 (9.4,14.8)	12.2 (9.2,16.0)	11.7 (8.8,15.5)	12.4 (9.7,15.8)	11.9 (9.5,15.2)	-1.6 (-3.8,0.9)
	Both	16.3 (13.0,20.1)	15.9 (12.9,19.3)	15.6 (12.7,18.8)	15.2 (12.3,18.4)	14.9 (12.1,18.1)	14.8 (12.2,17.8)	14.5 (12.1,17.2)	13.5 (11.4,15.9)	13.5 (11.6,15.6)	13.2 (11.3,15.3)	12.9 (11.1,15.1)	12.7 (10.8,15.1)	12.0 (10.0,14.6)	12.4 (10.2,15.4)	12.7 (10.3,15.5)	13.0 (10.5,16.3)	12.5 (10.1,15.6)	-1.7 (-3.5,0.5)
Conejos County, CO	Male	18.7 (15.6,22.2)	18.2 (15.2,21.6)	17.9 (14.8,21.1)	17.9 (14.9,21.2)	17.4 (14.4,20.7)	17.3 (14.3,20.7)	16.6 (14.2,19.3)	16.5 (14.2,19.2)	16.7 (14.4,19.2)	16.2 (13.7,18.8)	15.3 (13.1,17.8)	15.1 (12.9,17.6)	14.5 (12.4,17.0)	13.7 (11.3,16.4)	13.5 (10.2,16.9)	13.3 (10.7,16.3)	12.7 (10.3,15.5)	-2.4 (-4.3,-0.7)
	Female	13.1 (9.7,17.5)	13.0 (9.9,17.1)	12.9 (10.0,16.5)	13.4 (10.4,16.8)	13.8 (11.0,17.1)	13.5 (11.0,16.6)	13.4 (11.1,16.3)	12.3 (10.2,14.7)	12.1 (10.2,14.2)	12.4 (10.5,14.6)	12.0 (10.2,14.2)	11.4 (9.3,14.0)	11.8 (9.4,14.6)	11.3 (8.3,14.5)	10.5 (7.7,13.7)	10.2 (7.8,13.2)	10.0 (7.6,12.8)	-1.7 (-4.3,0.7)
	Both	15.8 (12.7,19.8)	15.6 (12.5,19.1)	15.3 (12.4,18.7)	15.6 (12.6,18.9)	15.6 (12.7,18.9)	15.4 (12.7,18.5)	15.0 (12.6,17.7)	14.4 (12.2,16.9)	14.3 (12.3,16.7)	14.2 (12.2,16.6)	13.6 (11.6,15.9)	13.3 (11.3,15.7)	13.2 (10.9,15.7)	12.5 (10.2,15.2)	12.0 (9.7,14.7)	11.7 (9.2,14.7)	11.3 (8.9,14.1)	-2.1 (-4.2,-0.1)
Costilla County, CO	Male	17.4 (14.2,20.9)	17.0 (13.9,20.4)	16.8 (13.9,20.1)	17.0 (13.9,20.3)	16.8 (13.7,20.1)	16.4 (13.4,19.7)	15.7 (13.2,18.3)	15.9 (13.4,18.6)	15.8 (13.4,18.4)	15.1 (12.5,17.9)	14.5 (12.2,17.2)	14.6 (12.3,17.4)	14.8 (12.5,17.7)	15.1 (12.4,18.4)	14.7 (11.2,18.8)	15.1 (12.2,18.6)	14.4 (11.6,17.7)	-1.2 (-2.9,0.6)
	Female	11.6 (8.5,15.3)	11.7 (8.7,15.1)	11.7 (8.9,15.0)	12.9 (9.9,16.3)	13.6 (10.6,17.0)	13.9 (11.1,17.1)	14.1 (11.5,17.1)	13.4 (11.1,16.2)	13.3 (11.2,15.7)	13.4 (11.4,15.7)	13.0 (10.9,15.3)	12.7 (10.4,15.3)	13.8 (11.2,16.9)	13.7 (10.6,17.3)	12.7 (9.8,16.1)	11.6 (9.0,14.9)	11.0 (8.5,14.1)	-0.3 (-2.7,2.2)
	Both	14.4 (11.3,17.9)	14.3 (11.3,17.7)	14.2 (11.3,17.5)	14.9 (11.9,18.3)	15.1 (12.1,18.5)	15.1 (12.2,18.3)	14.9 (12.3,17.7)	14.7 (12.3,17.4)	14.5 (12.3,17.1)	14.2 (12.0,16.7)	13.7 (11.6,16.2)	13.6 (11.4,16.1)	14.3 (12.0,17.1)	14.4 (11.9,17.4)	13.7 (11.1,17.0)	13.3 (10.6,16.7)	12.7 (10.1,15.9)	-0.8 (-2.9,1.2)
Crowley County, CO	Male	23.0 (19.4,26.9)	22.4 (19.0,26.1)	22.1 (18.8,25.8)	21.7 (18.4,25.4)	21.2 (17.8,25.1)	21.1 (17.7,25.0)	20.6 (17.6,24.0)	21.6 (18.7,24.9)	21.3 (18.6,24.4)	21.1 (17.9,24.6)	21.2 (18.3,24.4)	21.4 (18.4,24.9)	22.6 (19.6,26.2)	24.2 (20.4,28.4)	22.1 (17.3,27.4)	20.8 (17.3,25.2)	20.0 (16.5,24.3)	-0.9 (-2.4,0.7)
	Female	19.5 (14.8,25.4)	19.4 (15.0,24.6)	19.2 (15.2,23.9)	19.2 (15.4,23.5)	19.9 (16.3,24.3)	19.5 (16.1,23.7)	20.2 (16.8,24.3)	19.6 (16.6,23.1)	19.1 (16.4,22.1)	18.8 (16.2,21.8)	19.2 (16.5,22.4)	18.5 (15.5,22.1)	19.4 (16.0,23.4)	19.8 (15.5,24.7)	18.2 (14.1,22.8)	17.5 (13.9,22.2)	16.6 (13.2,21.3)	-1.0 (-3.1,1.2)
	Both	21.2 (17.1,26.0)	20.9 (17.0,25.3)	20.6 (17.0,24.7)	20.5 (16.9,24.4)	20.5 (17.0,24.7)	20.3 (17.0,24.3)	20.4 (17.2,24.0)	20.6 (17.7,23.9)	20.2 (17.5,23.2)	19.9 (17.1,22.9)	20.2 (17.5,23.4)	20.0 (17.1,23.4)	21.0 (17.8,24.6)	21.9 (18.5,26.0)	20.1 (16.6,24.4)	19.1 (15.5,23.6)	18.3 (14.8,22.8)	-0.9 (-2.7,0.9)
Custer County, CO	Male	20.5 (17.3,23.9)	19.9 (16.8,23.3)	19.5 (16.3,23.0)	18.9 (15.8,22.2)	18.6 (15.5,22.1)	19.0 (15.7,22.7)	18.5 (15.8,21.6)	18.0 (15.5,20.9)	17.4 (15.2,20.0)	16.8 (14.3,19.8)	16.6 (14.4,19.2)	16.9 (14.7,19.6)	16.4 (14.2,19.2)	17.1 (14.3,20.3)	17.2 (13.3,21.3)	16.1 (13.2,19.6)	15.4 (12.6,18.7)	-1.8 (-3.4,-0.3)
	Female	18.1 (13.9,23.3)	17.9 (14.0,22.7)	17.7 (14.0,22.2)	18.0 (14.2,22.2)	18.2 (14.5,22.4)	19.0 (15.6,23.0)	18.2 (15.2,21.9)	18.6 (15.9,22.2)	18.7 (16.1,21.9)	18.6 (16.2,21.4)	18.1 (15.7,21.0)	18.1 (15.1,21.4)	18.6 (15.5,22.2)	17.6 (13.8,22.0)	16.4 (12.6,20.5)	16.3 (12.9,20.4)	15.8 (12.5,19.8)	-0.9 (-3.0,1.2)
	Both	19.3 (15.6,23.6)	18.9 (15.4,23.0)	18.6 (15.1,22.4)	18.4 (14.9,22.2)	18.4 (15.0,22.3)	19.0 (15.7,22.7)	18.4 (15.5,21.7)	18.3 (15.7,21.5)	18.1 (15.7,21.0)	17.7 (15.4,20.6)	17.4 (15.1,20.1)	17.5 (15.0,20.3)	17.5 (15.0,20.6)	17.4 (14.7,20.7)	16.8 (13.9,20.4)	16.2 (13.1,20.0)	15.6 (12.6,19.2)	-1.3 (-3.2,0.4)
Delta County, CO	Male	23.3 (20.0,26.9)	22.7 (19.5,26.3)	22.2 (19.1,25.7)	21.8 (18.7,25.4)	20.6 (17.7,24.2)	20.5 (17.5,23.9)	19.5 (17.2,22.7)	18.8 (16.5,21.8)	18.4 (16.3,21.2)	18.8 (16.4,21.9)	17.8 (15.7,20.5)	17.5 (15.3,20.1)	18.1 (15.9,20.7)	18.6 (16.1,21.6)	18.0 (14.6,22.0)	18.2 (15.4,21.5)	17.4 (14.7,20.6)	-1.8 (-3.2,-0.4)
	Female	20.7 (16.3,25.6)	20.4 (16.6,24.7)	20.1 (16.6,24.2)	20.8 (17.4,24.7)	19.8 (16.6,23.7)	19.1 (16.3,22.6)	19.0 (16.2,22.4)	19.4 (16.9,22.6)	18.1 (16.1,20.8)	18.8 (16.7,21.4)	18.2 (16.1,20.8)	18.2 (15.7,21.3)	17.7 (14.8,21.0)	18.3 (14.7,22.2)	17.6 (13.9,21.7)	18.6 (15.4,22.2)	17.9 (14.9,21.3)	-0.9 (-2.6,1.0)
	Both	22.0 (18.3,26.1)	21.5 (18.1,25.4)	21.2 (17.9,24.8)	21.3 (18.0,25.1)	20.2 (17.1,23.9)	19.8 (17.1,23.3)	19.3 (16.7,22.6)	19.1 (16.7,22.3)	18.3 (16.2,21.0)	18.8 (16.7,21.3)	18.0 (16.0,20.5)	17.9 (15.8,20.5)	17.9 (15.5,20.7)	18.5 (15.9,21.6)	17.8 (15.0,21.0)	18.4 (15.4,21.9)	17.7 (14.8,21.1)	-1.4 (-2.9,0.3)
Denver County, CO	Male	21.1 (18.8,23.6)	20.4 (18.3,22.9)	19.9 (17.8,22.3)	20.6 (18.5,23.2)	19.6 (17.5,22.0)	18.6 (16.5,21.0)	17.6 (16.0,19.4)	17.8 (16.3,19.5)	16.4 (15.1,17.9)	16.1 (14.7,17.8)	16.5 (15.4,17.8)	17.4 (16.1,18.8)	16.6 (15.2,18.2)	16.6 (15.0,18.4)	16.9 (14.7,19.2)	15.1 (13.1,17.3)	14.5 (12.6,16.6)	-2.3 (-3.5,-1.2)
	Female	17.0 (14.4,19.9)	16.8 (14.5,19.4)	16.6 (14.5,18.9)	16.2 (14.2,18.4)	17.4 (15.5,19.6)	16.1 (14.4,18.0)	16.0 (14.7,17.4)	15.4 (14.4,16.6)	15.4 (14.4,16.5)	14.7 (13.7,15.7)	14.5 (13.4,15.7)	13.9 (12.4,15.4)	13.8 (12.1,15.5)	13.0 (11.0,15.1)	12.1 (9.9,14.3)	11.2 (9.5,13.0)	10.8 (9.2,12.5)	-2.9 (-4.2,-1.5)
	Both	19.0 (16.5,21.8)	18.6 (16.4,21.0)	18.2 (16.2,20.6)	18.4 (16.3,20.8)	18.5 (16.4,20.7)	17.3 (15.5,19.4)	16.8 (15.4,18.5)	16.6 (15.3,18.0)	15.9 (14.8,17.1)	15.4 (14.4,16.6)	15.5 (14.4,16.7)	15.6 (14.3,17.0)	15.2 (13.7,16.8)	14.8 (13.1,16.6)	14.4 (12.8,16.2)	13.1 (11.3,15.1)	12.6 (10.9,14.5)	-2.6 (-3.8,-1.3)
Dolores County, CO	Male	23.2 (19.5,26.6)	22.5 (19.1,25.9)	22.1 (18.8,25.5)	21.5 (18.2,24.9)	20.6 (17.2,24.1)	21.2 (17.8,24.8)	21.6 (18.6,24.8)	22.3 (19.3,25.5)	22.8 (19.9,25.9)	22.8 (19.5,26.1)	22.6 (19.6,25.8)	22.6 (19.6,25.8)	21.4 (18.6,24.7)	18.6 (15.4,22.2)	18.8 (14.4,23.3)	18.7 (15.4,22.7)	17.9 (14.7,21.8)	-1.6 (-3.1,0.0)
	Female	18.7 (13.9,23.5)	18.6 (14.4,23.0)	18.5 (14.5,22.6)	18.5 (14.7,22.4)	18.8 (15.0,22.7)	19.3 (15.8,23.3)	19.3 (16.0,23.0)	19.5 (16.4,22.9)	19.8 (16.9,22.9)	19.5 (16.8,22.4)	19.0 (16.4,21.9)	18.9 (16.0,22.3)	18.6 (15.5,22.3)	17.3 (13.5,21.6)	14.3 (10.8,18.3)	14.7 (11.5,18.8)	14.3 (11.2,18.2)	-1.7 (-3.9,0.6)
	Both	20.9 (16.8,25.0)	20.5 (16.7,24.4)	20.3 (16.7,23.9)	20.0 (16.4,23.6)	19.6 (16.1,23.4)	20.2 (16.8,23.9)	20.4 (17.2,23.9)	20.9 (17.9,24.2)	21.3 (18.4,24.4)	21.1 (18.3,24.2)	20.8 (18.0,23.8)	20.7 (17.9,23.8)	20.0 (17.2,23.4)	17.9 (15.1,21.5)	16.5 (13.5,20.2)	16.7 (13.4,20.8)	16.1 (12.9,20.0)	-1.6 (-3.5,0.2)
Douglas County, CO	Male	13.6 (11.6,16.1)	13.2 (11.1,15.6)	12.9 (10.9,15.3)	12.0 (10.1,14.2)	11.5 (9.7,13.8)	11.2 (9.5,13.5)	11.0 (9.5,12.9)	10.7 (9.3,12.4)	10.3 (9.0,11.8)	9.7 (8.4,11.2)	9.0 (7.9,10.3)	8.8 (7.7,10.0)	8.6 (7.4,10.0)	8.7 (7.4,10.2)	8.9 (7.0,10.8)	9.2 (7.6,11.0)	8.7 (7.2,10.5)	-2.8 (-4.4,-1.2)
	Female	11.4 (8.7,14.9)	11.3 (8.9,14.4)	11.3 (9.1,14.1)	10.3 (8.3,12.8)	10.1 (8.3,12.5)	9.8 (8.2,11.9)	9.5 (8.1,11.4)	9.0 (7.8,10.5)	8.9 (7.9,10.1)	8.7 (7.8,9.9)	8.3 (7.4,9.4)	7.5 (6.3,8.8)	7.0 (5.6,8.4)	6.9 (5.1,8.6)	6.4 (4.6,8.2)	7.3 (5.9,9.0)	7.1 (5.7,8.7)	-3.0 (-5.2,-0.8)
	Both	12.5 (10.2,15.4)	12.2 (10.1,15.0)	12.1 (9.9,14.6)	11.1 (9.2,13.5)	10.8 (9.0,13.1)	10.5 (8.8,12.7)	10.2 (8.7,12.1)	9.8 (8.5,11.5)	9.6 (8.5,11.0)	9.2 (8.1,10.4)	8.7 (7.7,9.8)	8.1 (7.1,9.3)	7.8 (6.6,9.1)	7.8 (6.5,9.3)	7.6 (6.2,9.1)	8.2 (6.7,10.0)	7.9 (6.4,9.6)	-2.9 (-4.8,-1.1)
Eagle County, CO	Male	16.7 (14.1,19.5)	16.2 (13.8,19.0)	15.7 (13.3,18.6)	15.4 (13.0,18.3)	15.1 (12.6,18.1)	14.7 (12.3,17.6)	14.0 (12.0,16.5)	13.7 (11.8,16.0)	13.2 (11.5,15.2)	12.9 (11.0,15.2)	12.7 (11.0,14.7)	12.1 (10.4,14.0)	11.6 (10.0,13.4)	10.5 (8.8,12.6)	10.2 (7.9,12.9)	10.7 (8.7,13.0)	10.2 (8.3,12.4)	-3.1 (-4.7,-1.5)
	Female	12.1 (9.1,15.9)	11.9 (9.1,15.2)	11.7 (9.1,14.7)	11.6 (9.2,14.6)	11.5 (9.2,14.4)	11.4 (9.3,14.0)	10.5 (8.6,12.8)	10.2 (8.6,12.3)	9.6 (8.2,11.2)	9.0 (7.6,10.4)	8.4 (7.1,9.8)	8.7 (7.2,10.4)	8.4 (6.9,10.2)	7.7 (5.8,9.9)	7.4 (5.5,9.7)	7.3 (5.6,9.3)	7.0 (5.4,8.9)	-3.4 (-5.7,-1.1)
	Both	14.3 (11.6,17.6)	14.0 (11.4,17.0)	13.7 (11.3,16.6)	13.5 (11.1,16.4)	13.3 (10.9,16.2)	13.0 (10.8,15.8)	12.2 (10.3,14.6)	12.0 (10.2,14.1)	11.4 (9.9,13.2)	10.9 (9.5,12.6)	10.5 (9.1,12.2)	10.3 (8.9,12.1)	10.0 (8.5,11.8)	9.1 (7.5,11.0)	8.8 (7.2,10.8)	9.0 (7.1,11.1)	8.6 (6.8,10.7)	-3.2 (-5.1,-1.4)
El Paso County, CO	Male	20.5 (18.1,23.0)	20.0 (17.7,22.4)	19.5 (17.5,21.9)	19.0 (16.9,21.4)	18.4 (16.4,20.7)	18.3 (16.3,20.5)	17.3 (15.6,19.2)	17.5 (15.9,19.2)	16.8 (15.4,18.3)	16.0 (14.6,17.5)	16.0 (14.9,17.3)	15.9 (14.7,17.3)	16.1 (14.8,17.6)	16.0 (14.5,17.6)	16.2 (14.0,18.3)	14.7 (12.9,16.8)	14.1 (12.3,16.1)	-2.4 (-3.5,-1.3)
	Female	18.3 (15.4,21.4)	17.9 (15.4,20.5)	17.5 (15.3,19.9)	16.4 (14.3,18.7)	14.9 (13.1,16.9)	14.1 (12.7,15.9)	14.3 (13.0,15.7)	14.4 (13.3,15.7)	14.4 (13.5,15.5)	14.9 (14.0,16.0)	14.5 (13.5,15.8)	14.0 (12.6,15.5)	13.8 (12.1,15.5)	13.6 (11.5,15.7)	12.8 (10.6,15.1)	13.0 (11.3,15.0)	12.5 (10.9,14.4)	-2.4 (-3.7,-1.1)
	Both	19.4 (16.8,22.2)	18.9 (16.6,21.3)	18.5 (16.3,20.8)	17.7 (15.6,20.0)	16.6 (14.8,18.8)	16.2 (14.5,18.1)	15.7 (14.3,17.4)	15.9 (14.7,17.4)	15.6 (14.4,16.8)	15.4 (14.4,16.6)	15.3 (14.2,16.4)	14.9 (13.8,16.3)	14.9 (13.6,16.5)	14.7 (13.2,16.5)	14.5 (12.8,16.3)	13.8 (12.1,15.9)	13.3 (11.6,15.2)	-2.4 (-3.6,-1.2)
Elbert County, CO	Male	19.7 (16.5,23.2)	19.2 (16.0,22.5)	18.7 (15.6,21.9)	17.9 (14.9,21.2)	16.7 (13.9,19.8)	16.6 (13.7,19.9)	16.3 (13.8,19.0)	16.3 (13.9,19.0)	15.7 (13.7,18.2)	15.0 (12.8,17.5)	14.3 (12.5,16.6)	13.9 (12.1,16.2)	13.1 (11.4,15.2)	13.2 (11.3,15.6)	13.0 (10.3,15.9)	13.4 (11.3,16.0)	12.8 (10.8,15.3)	-2.7 (-4.2,-1.3)
	Female	17.3 (13.3,22.4)	17.0 (13.3,21.6)	16.8 (13.2,21.0)	15.5 (12.3,19.3)	14.8 (11.8,18.2)	14.0 (11.3,17.1)	14.6 (11.9,17.7)	15.2 (12.8,18.3)	15.2 (13.1,18.0)	16.0 (13.9,18.7)	15.5 (13.6,18.0)	14.3 (12.4,16.7)	12.9 (10.9,15.3)	12.3 (9.8,14.9)	10.9 (8.5,13.5)	10.7 (8.7,13.2)	10.3 (8.4,12.7)	-3.2 (-5.3,-1.2)
	Both	18.5 (15.0,22.7)	18.1 (14.7,22.0)	17.7 (14.4,21.4)	16.7 (13.6,20.3)	15.7 (12.8,19.0)	15.3 (12.6,18.4)	15.4 (12.9,18.3)	15.7 (13.3,18.6)	15.5 (13.4,18.1)	15.5 (13.5,18.1)	15.0 (13.0,17.3)	14.1 (12.4,16.3)	13.0 (11.3,15.0)	12.7 (11.0,14.9)	11.9 (10.1,14.3)	12.0 (10.0,14.6)	11.5 (9.5,14.0)	-2.9 (-4.7,-1.3)
Fremont County, CO	Male	27.0 (23.6,30.6)	26.4 (23.2,30.0)	26.0 (22.7,29.7)	25.2 (22.0,28.8)	25.4 (21.9,29.1)	25.4 (22.1,29.1)	25.2 (22.3,28.4)	25.1 (22.1,28.3)	24.1 (21.4,27.0)	23.0 (20.0,25.9)	22.9 (20.4,25.7)	22.6 (20.1,25.3)	22.8 (20.3,25.4)	23.1 (20.1,26.0)	24.0 (19.9,28.0)	23.5 (20.3,26.8)	22.7 (19.6,25.9)	-1.1 (-2.2,0.1)
	Female	22.6 (18.1,27.6)	22.5 (18.5,27.1)	22.5 (18.9,26.5)	22.2 (18.8,26.0)	22.0 (18.7,25.7)	21.8 (18.8,25.0)	21.5 (18.8,24.5)	22.0 (19.2,25.1)	22.6 (20.2,25.3)	22.6 (20.3,25.2)	23.1 (20.9,25.6)	22.1 (19.5,25.1)	22.0 (19.1,25.4)	21.6 (18.0,25.6)	21.4 (17.6,25.6)	22.1 (18.7,25.6)	21.4 (18.1,24.7)	-0.4 (-1.9,1.3)
	Both	24.8 (20.9,29.1)	24.4 (20.9,28.4)	24.2 (20.9,27.8)	23.6 (20.4,27.3)	23.7 (20.2,27.4)	23.5 (20.4,27.0)	23.3 (20.5,26.4)	23.5 (20.7,26.7)	23.3 (20.8,26.1)	22.8 (20.4,25.5)	23.0 (20.7,25.5)	22.4 (20.0,25.0)	22.4 (19.9,25.2)	22.3 (19.6,25.4)	22.7 (19.7,25.7)	22.8 (19.5,26.2)	22.0 (18.9,25.3)	-0.7 (-2.0,0.6)
Garfield County, CO	Male	21.7 (18.6,25.1)	21.1 (18.1,24.4)	20.7 (17.7,24.0)	20.3 (17.2,23.6)	20.0 (17.0,23.5)	20.2 (17.1,23.7)	19.4 (16.9,22.3)	18.9 (16.4,21.5)	17.8 (15.7,20.1)	18.1 (15.8,20.7)	17.6 (15.5,19.9)	17.1 (15.0,19.4)	17.2 (15.2,19.7)	17.0 (14.6,19.7)	16.2 (12.9,19.7)	16.0 (13.3,19.1)	15.3 (12.8,18.4)	-2.2 (-3.6,-0.6)
	Female	18.7 (14.6,23.5)	18.3 (14.6,22.6)	17.9 (14.4,21.7)	17.3 (14.0,20.9)	17.1 (14.0,20.7)	16.6 (13.8,19.7)	14.9 (12.5,17.6)	14.6 (12.5,16.9)	14.7 (12.8,16.8)	14.3 (12.5,16.2)	14.0 (12.4,16.0)	14.7 (12.7,17.1)	14.2 (12.0,16.9)	13.0 (10.3,16.1)	12.8 (10.2,16.2)	12.3 (9.9,15.3)	11.8 (9.5,14.6)	-2.9 (-4.8,-0.8)
	Both	20.2 (16.6,24.1)	19.7 (16.4,23.3)	19.3 (16.1,22.8)	18.8 (15.7,22.3)	18.5 (15.5,22.1)	18.4 (15.6,21.7)	17.1 (14.7,19.9)	16.7 (14.5,19.1)	16.2 (14.2,18.4)	16.2 (14.2,18.3)	15.8 (13.9,17.8)	15.9 (14.1,18.1)	15.7 (13.7,18.1)	15.0 (12.8,17.6)	14.5 (12.1,17.2)	14.1 (11.6,17.2)	13.6 (11.1,16.5)	-2.5 (-4.1,-0.7)
Gilpin County, CO	Male	18.2 (15.3,21.7)	17.7 (15.0,21.2)	17.3 (14.6,20.7)	17.0 (14.3,20.4)	16.5 (13.7,19.9)	16.3 (13.6,19.6)	16.8 (14.4,19.6)	16.4 (14.0,19.1)	16.5 (14.2,19.0)	16.0 (13.5,18.8)	15.9 (13.5,18.4)	15.3 (12.9,17.8)	15.8 (13.3,18.3)	16.7 (13.9,19.5)	15.6 (12.0,19.3)	15.9 (13.0,18.9)	15.2 (12.3,18.1)	-1.1 (-2.9,0.4)
	Female	15.9 (11.9,20.8)	15.8 (12.2,20.3)	15.8 (12.4,19.8)	15.2 (12.1,19.3)	15.5 (12.4,19.6)	15.6 (12.7,19.2)	14.6 (12.0,17.9)	13.4 (11.0,16.1)	13.0 (11.0,15.3)	13.3 (11.2,15.4)	12.7 (10.6,14.9)	12.7 (10.2,15.3)	13.0 (10.2,15.9)	15.0 (11.4,18.8)	12.8 (9.3,16.4)	13.5 (10.5,16.8)	12.9 (10.1,16.0)	-1.3 (-3.6,0.9)
	Both	17.0 (13.7,21.2)	16.7 (13.6,20.4)	16.5 (13.5,20.3)	16.1 (13.2,19.8)	16.0 (13.1,19.7)	16.0 (13.3,19.4)	15.7 (13.2,18.7)	14.8 (12.5,17.6)	14.7 (12.6,17.1)	14.6 (12.5,17.0)	14.3 (12.1,16.5)	14.0 (11.7,16.4)	14.4 (11.8,16.8)	15.8 (13.0,18.6)	14.2 (11.5,17.0)	14.7 (11.7,17.8)	14.0 (11.2,17.0)	-1.2 (-3.2,0.6)
Grand County, CO	Male	17.4 (14.6,20.5)	16.9 (14.3,19.9)	16.4 (13.9,19.2)	16.2 (13.7,19.1)	15.6 (13.1,18.3)	16.0 (13.5,18.7)	16.9 (14.5,19.5)	17.3 (15.0,19.8)	18.0 (15.7,20.3)	18.0 (15.5,20.6)	18.4 (16.0,20.9)	18.2 (15.8,20.8)	16.9 (14.6,19.5)	15.8 (13.3,18.5)	15.6 (12.3,19.1)	16.0 (13.2,19.2)	15.4 (12.6,18.5)	-0.7 (-2.3,0.9)
	Female	14.9 (11.6,19.3)	14.6 (11.6,18.4)	14.5 (11.6,18.0)	14.4 (11.7,17.7)	14.5 (11.8,17.6)	15.3 (12.7,18.2)	15.0 (12.4,17.8)	14.6 (12.2,17.1)	14.2 (12.1,16.3)	14.6 (12.6,16.8)	14.1 (12.1,16.4)	14.9 (12.4,17.6)	14.1 (11.4,17.0)	13.9 (10.5,17.5)	12.2 (9.0,15.6)	12.5 (9.7,15.6)	12.0 (9.4,15.1)	-1.3 (-3.7,1.0)
	Both	16.1 (13.1,19.7)	15.7 (12.9,19.1)	15.4 (12.7,18.6)	15.3 (12.6,18.4)	15.1 (12.4,17.9)	15.6 (13.1,18.4)	15.9 (13.5,18.6)	15.9 (13.6,18.4)	16.1 (13.9,18.2)	16.3 (14.1,18.5)	16.2 (14.1,18.6)	16.5 (14.3,19.1)	15.5 (13.1,18.1)	14.8 (12.4,17.7)	13.9 (11.3,16.7)	14.2 (11.4,17.4)	13.7 (10.9,16.8)	-1.0 (-2.9,0.9)
Gunnison County, CO	Male	15.3 (13.0,18.3)	14.9 (12.7,17.6)	14.6 (12.3,17.2)	14.2 (11.9,16.8)	13.4 (11.2,15.9)	13.2 (11.0,15.8)	12.7 (10.7,14.8)	12.3 (10.5,14.4)	12.1 (10.4,14.1)	11.9 (10.0,14.1)	11.4 (9.7,13.3)	11.3 (9.6,13.3)	10.9 (9.3,12.8)	10.6 (8.8,12.7)	9.6 (7.1,12.2)	9.9 (8.0,12.2)	9.4 (7.6,11.6)	-3.1 (-4.7,-1.4)
	Female	12.7 (9.5,17.0)	12.5 (9.7,16.3)	12.4 (9.9,15.9)	12.9 (10.3,16.1)	12.7 (10.3,15.6)	12.8 (10.4,15.6)	12.4 (10.2,15.1)	11.5 (9.5,13.8)	11.1 (9.4,13.2)	11.9 (10.1,14.1)	11.4 (9.7,13.5)	11.2 (9.3,13.5)	10.6 (8.6,12.9)	10.1 (7.7,12.7)	8.5 (6.4,11.1)	8.7 (6.8,11.2)	8.4 (6.6,10.7)	-2.5 (-4.8,-0.3)
	Both	14.0 (11.2,17.5)	13.7 (11.2,16.9)	13.5 (11.1,16.5)	13.5 (11.1,16.5)	13.0 (10.7,15.7)	13.0 (10.8,15.6)	12.5 (10.4,14.9)	11.9 (10.0,14.0)	11.6 (9.9,13.6)	11.9 (10.1,14.0)	11.4 (9.7,13.4)	11.3 (9.6,13.2)	10.7 (9.0,12.7)	10.4 (8.6,12.5)	9.0 (7.2,11.2)	9.3 (7.4,11.7)	8.9 (7.0,11.1)	-2.8 (-4.7,-0.9)
Hinsdale County, CO	Male	18.1 (15.1,21.2)	17.6 (14.7,20.7)	17.3 (14.5,20.3)	16.9 (14.1,19.9)	16.4 (13.7,19.4)	17.0 (14.1,20.2)	16.8 (14.4,19.4)	17.3 (14.8,19.9)	17.5 (15.1,20.1)	17.4 (14.8,20.2)	17.6 (15.0,20.4)	18.4 (15.8,21.5)	13.6 (11.6,16.0)	12.8 (10.6,15.5)	10.8 (8.1,13.9)	10.9 (8.7,13.5)	10.4 (8.2,12.9)	-3.5 (-5.2,-1.7)
	Female	14.2 (10.6,18.7)	14.1 (10.8,18.1)	14.1 (11.0,17.7)	14.1 (11.2,17.5)	14.0 (11.2,17.2)	15.1 (12.2,18.1)	15.0 (12.2,17.9)	14.9 (12.3,17.8)	15.1 (12.7,17.7)	16.1 (13.6,18.9)	15.9 (13.3,18.7)	16.2 (13.4,19.3)	10.3 (8.2,12.7)	9.5 (7.1,12.4)	8.9 (6.4,11.7)	8.9 (6.7,11.6)	8.6 (6.5,11.1)	-3.2 (-5.5,-0.8)
	Both	16.1 (12.8,19.8)	15.9 (12.7,19.3)	15.7 (12.8,18.9)	15.5 (12.7,18.7)	15.2 (12.4,18.3)	16.0 (13.2,19.0)	15.9 (13.3,18.7)	16.1 (13.6,18.8)	16.3 (13.9,18.9)	16.7 (14.3,19.4)	16.7 (14.1,19.5)	17.3 (14.7,20.3)	11.9 (9.9,14.2)	11.2 (9.1,13.6)	9.9 (7.9,12.4)	9.9 (7.7,12.6)	9.5 (7.4,12.0)	-3.3 (-5.3,-1.4)
Huerfano County, CO	Male	21.7 (18.3,25.4)	21.2 (17.9,25.0)	20.9 (17.6,24.7)	20.9 (17.5,24.7)	20.4 (17.0,24.5)	20.5 (17.0,24.6)	19.6 (16.7,23.1)	19.4 (16.6,22.6)	19.1 (16.6,21.9)	18.9 (16.0,22.1)	18.2 (15.6,21.2)	18.0 (15.3,21.0)	18.0 (15.5,20.9)	18.4 (15.5,21.7)	17.3 (13.6,21.4)	16.4 (13.4,19.5)	15.8 (12.8,18.9)	-2.0 (-3.5,-0.5)
	Female	16.9 (12.7,21.9)	16.7 (12.9,21.4)	16.6 (13.0,20.7)	17.2 (13.6,21.4)	17.4 (13.9,21.7)	17.9 (14.6,22.0)	17.1 (14.1,20.8)	16.3 (13.7,19.4)	15.4 (13.1,18.1)	15.2 (13.0,17.7)	14.4 (12.2,16.9)	14.3 (11.7,17.1)	13.1 (10.3,16.0)	13.6 (10.2,17.1)	13.5 (10.3,16.9)	12.7 (9.9,16.0)	12.2 (9.5,15.2)	-2.1 (-4.3,0.2)
	Both	19.2 (15.4,23.6)	18.9 (15.4,22.9)	18.7 (15.3,22.6)	19.0 (15.5,23.0)	18.9 (15.4,23.1)	19.2 (15.8,23.3)	18.3 (15.4,21.9)	17.8 (15.1,20.8)	17.2 (14.8,19.9)	17.0 (14.6,19.8)	16.3 (13.9,18.9)	16.1 (13.7,18.8)	15.5 (13.1,18.3)	15.9 (13.3,19.0)	15.4 (12.6,18.4)	14.5 (11.6,17.7)	13.9 (11.1,17.0)	-2.0 (-3.9,-0.2)
Jackson County, CO	Male	21.7 (18.2,25.5)	21.0 (17.7,24.7)	20.6 (17.3,24.2)	20.6 (17.3,24.4)	20.0 (16.7,23.8)	19.3 (16.0,23.0)	19.1 (16.4,22.2)	18.4 (15.9,21.1)	17.8 (15.6,20.1)	16.3 (13.8,18.9)	15.9 (13.7,18.2)	14.7 (12.4,17.1)	14.3 (12.0,16.9)	14.9 (12.2,17.9)	15.3 (11.5,19.2)	16.0 (13.1,19.2)	15.1 (12.3,18.2)	-2.3 (-3.9,-0.7)
	Female	18.7 (14.1,24.1)	18.6 (14.3,23.6)	18.4 (14.4,22.9)	18.4 (14.5,22.8)	17.8 (14.3,22.0)	17.8 (14.6,21.5)	17.3 (14.4,20.5)	18.2 (15.9,20.5)	17.7 (15.5,19.9)	17.4 (15.2,19.5)	16.6 (14.3,18.9)	16.7 (13.9,19.6)	15.3 (12.2,18.5)	15.5 (11.7,19.5)	15.2 (11.5,19.1)	14.4 (11.2,17.9)	13.7 (10.7,17.0)	-2.0 (-4.2,0.2)
	Both	20.2 (16.1,24.8)	19.8 (16.0,24.1)	19.5 (15.9,23.5)	19.5 (15.9,23.6)	18.9 (15.5,23.0)	18.5 (15.3,22.2)	18.2 (15.4,21.2)	18.3 (15.9,20.7)	17.7 (15.6,19.9)	16.8 (14.7,19.0)	16.2 (14.0,18.5)	15.7 (13.3,18.2)	14.8 (12.2,17.7)	15.2 (12.4,18.3)	15.2 (12.3,18.5)	15.2 (12.1,18.6)	14.4 (11.5,17.6)	-2.1 (-4.0,-0.3)
Kiowa County, CO	Male	22.3 (19.1,26.0)	21.7 (18.5,25.3)	21.2 (18.1,24.7)	20.8 (17.6,24.4)	20.1 (16.8,23.7)	19.9 (16.7,23.6)	19.5 (16.7,22.6)	19.2 (16.4,22.2)	18.5 (16.0,21.1)	17.6 (14.8,20.5)	16.6 (14.2,19.1)	15.9 (13.5,18.5)	16.0 (13.7,18.7)	15.1 (12.5,17.9)	14.8 (11.3,18.5)	14.5 (11.7,17.6)	13.8 (11.1,16.8)	-3.0 (-4.5,-1.4)
	Female	18.5 (14.2,24.0)	18.4 (14.5,23.2)	18.2 (14.5,22.5)	18.4 (14.8,22.5)	18.2 (14.7,22.4)	17.7 (14.5,21.4)	17.9 (14.8,21.4)	17.8 (14.9,20.9)	17.0 (14.4,19.8)	16.6 (14.2,19.2)	16.0 (13.7,18.7)	15.2 (12.5,18.2)	16.3 (13.2,19.7)	15.5 (12.0,19.5)	14.9 (11.4,18.9)	15.0 (11.5,19.1)	14.3 (11.0,18.2)	-1.6 (-3.7,0.5)
	Both	20.4 (16.6,24.9)	20.0 (16.5,24.1)	19.7 (16.3,23.5)	19.5 (16.2,23.4)	19.1 (15.8,23.0)	18.8 (15.6,22.4)	18.7 (15.7,21.9)	18.5 (15.6,21.5)	17.7 (15.2,20.4)	17.1 (14.6,19.7)	16.3 (14.0,18.9)	15.5 (13.2,18.2)	16.1 (13.6,19.1)	15.3 (12.6,18.4)	14.9 (12.0,18.1)	14.8 (11.6,18.4)	14.1 (11.1,17.5)	-2.3 (-4.1,-0.5)
Kit Carson County, CO	Male	23.6 (20.3,27.5)	23.0 (19.8,26.9)	22.6 (19.3,26.4)	22.2 (18.9,25.9)	21.0 (17.7,24.8)	21.1 (17.8,25.0)	20.9 (17.9,24.1)	21.2 (18.2,24.3)	21.2 (18.4,24.1)	21.3 (18.2,24.5)	21.0 (18.1,24.1)	21.1 (18.1,24.5)	19.8 (17.0,23.1)	19.5 (16.4,23.3)	19.4 (15.3,23.9)	19.6 (16.2,23.5)	18.8 (15.5,22.7)	-1.4 (-3.0,0.1)
	Female	18.7 (14.5,24.0)	18.5 (14.7,23.1)	18.3 (14.7,22.7)	18.1 (14.6,22.4)	18.2 (14.7,22.4)	18.3 (15.0,22.1)	18.0 (14.9,21.4)	18.5 (15.5,21.7)	18.6 (15.9,21.5)	18.6 (15.9,21.4)	18.1 (15.4,21.0)	18.3 (15.0,21.7)	17.9 (14.5,21.8)	17.1 (12.9,21.8)	16.5 (12.4,21.1)	16.6 (13.0,21.1)	16.2 (12.7,20.5)	-0.9 (-3.2,1.3)
	Both	21.1 (17.4,25.6)	20.7 (17.2,24.8)	20.4 (17.0,24.5)	20.1 (16.7,24.1)	19.6 (16.1,23.6)	19.7 (16.4,23.4)	19.4 (16.4,22.8)	19.8 (16.8,23.0)	19.9 (17.1,22.7)	19.9 (17.2,22.8)	19.5 (16.7,22.5)	19.6 (16.8,22.8)	18.9 (15.9,22.3)	18.3 (15.2,22.0)	17.9 (14.8,22.0)	18.1 (14.6,22.2)	17.4 (14.1,21.6)	-1.2 (-3.0,0.6)
La Plata County, CO	Male	16.4 (13.9,19.1)	15.8 (13.5,18.4)	15.4 (13.1,18.1)	15.1 (12.8,17.7)	15.1 (12.7,17.7)	14.6 (12.3,17.2)	14.4 (12.2,16.7)	14.1 (12.0,16.3)	13.8 (11.8,15.8)	13.4 (11.3,15.5)	12.9 (11.0,14.9)	12.6 (10.8,14.6)	13.2 (11.4,15.3)	13.3 (11.3,15.7)	12.5 (9.8,15.3)	12.2 (10.1,14.8)	11.7 (9.7,14.1)	-2.1 (-3.6,-0.6)
	Female	13.9 (10.6,18.0)	13.7 (10.8,17.1)	13.5 (10.8,16.6)	13.2 (10.7,16.1)	13.5 (11.1,16.4)	13.7 (11.3,16.4)	13.0 (10.6,15.5)	13.4 (11.2,15.7)	13.0 (11.1,15.1)	12.8 (11.1,14.8)	12.1 (10.5,14.0)	12.2 (10.3,14.4)	12.0 (9.9,14.3)	11.4 (9.0,14.2)	10.8 (8.4,13.7)	10.8 (8.6,13.5)	10.3 (8.3,12.8)	-1.9 (-4.0,0.2)
	Both	15.1 (12.3,18.3)	14.8 (12.2,17.8)	14.5 (12.0,17.2)	14.1 (11.7,16.9)	14.3 (11.9,17.0)	14.2 (11.9,16.8)	13.7 (11.4,16.1)	13.7 (11.6,16.0)	13.4 (11.4,15.4)	13.1 (11.3,15.1)	12.5 (10.8,14.4)	12.4 (10.6,14.4)	12.6 (10.8,14.7)	12.4 (10.5,14.7)	11.6 (9.7,14.1)	11.5 (9.4,14.1)	11.0 (9.0,13.5)	-2.0 (-3.8,-0.2)
Lake County, CO	Male	22.8 (19.4,26.3)	22.2 (19.0,25.5)	21.7 (18.5,25.1)	21.3 (18.1,24.7)	20.8 (17.6,24.3)	20.6 (17.4,24.1)	20.0 (17.3,23.0)	19.9 (17.2,23.0)	19.3 (16.8,22.2)	18.9 (16.2,22.0)	19.1 (16.6,22.0)	18.9 (16.3,21.9)	17.7 (15.1,20.4)	16.5 (13.7,19.4)	15.4 (11.9,19.3)	15.1 (12.3,18.1)	14.4 (11.7,17.4)	-2.9 (-4.3,-1.2)
	Female	16.9 (13.0,21.4)	16.7 (13.1,20.7)	16.5 (13.1,20.2)	16.8 (13.6,20.4)	16.5 (13.4,20.1)	16.6 (13.7,20.1)	16.2 (13.5,19.5)	15.0 (12.6,18.0)	14.5 (12.3,17.1)	14.2 (12.2,16.7)	13.9 (11.8,16.4)	14.4 (12.0,17.3)	14.2 (11.6,17.2)	13.4 (10.4,17.0)	11.9 (9.1,15.4)	11.9 (9.1,14.9)	11.6 (8.9,14.4)	-2.4 (-4.5,-0.1)
	Both	19.8 (16.2,23.7)	19.4 (16.0,23.1)	19.0 (15.8,22.6)	19.0 (15.8,22.5)	18.6 (15.4,22.1)	18.6 (15.6,21.9)	18.1 (15.4,21.3)	17.4 (14.9,20.5)	16.9 (14.6,19.6)	16.5 (14.3,19.2)	16.5 (14.2,19.2)	16.6 (14.2,19.3)	15.9 (13.4,18.6)	14.9 (12.4,17.8)	13.6 (11.0,16.4)	13.5 (10.7,16.4)	13.0 (10.3,15.9)	-2.6 (-4.3,-0.8)
Larimer County, CO	Male	17.2 (14.7,20.0)	16.7 (14.4,19.5)	16.3 (14.1,19.1)	16.7 (14.5,19.5)	16.6 (14.4,19.3)	15.8 (13.6,18.4)	16.1 (14.2,18.3)	15.7 (14.0,17.7)	15.0 (13.5,16.8)	14.6 (13.0,16.4)	14.5 (13.1,15.9)	13.9 (12.5,15.4)	13.1 (11.7,14.6)	12.5 (10.9,14.2)	11.9 (9.7,14.1)	11.8 (9.9,13.8)	11.3 (9.4,13.3)	-2.6 (-4.0,-1.4)
	Female	14.8 (11.9,18.6)	14.7 (12.2,17.9)	14.7 (12.3,17.5)	14.3 (12.0,17.0)	14.4 (12.3,16.9)	14.2 (12.4,16.4)	13.8 (12.2,15.6)	14.2 (12.8,15.8)	13.5 (12.3,14.9)	13.2 (12.1,14.5)	12.4 (11.2,13.7)	12.4 (10.9,14.0)	11.8 (10.0,13.6)	12.0 (9.8,14.2)	10.9 (8.7,13.1)	10.8 (9.0,12.9)	10.4 (8.7,12.4)	-2.2 (-3.9,-0.6)
	Both	16.0 (13.4,19.2)	15.7 (13.3,18.5)	15.5 (13.2,18.2)	15.5 (13.2,18.2)	15.5 (13.3,18.1)	15.0 (13.0,17.4)	14.9 (13.2,16.9)	14.9 (13.4,16.7)	14.2 (12.9,15.8)	13.9 (12.6,15.3)	13.4 (12.2,14.8)	13.1 (11.8,14.6)	12.4 (10.9,14.0)	12.3 (10.6,14.0)	11.4 (9.7,13.3)	11.3 (9.4,13.4)	10.8 (9.0,12.8)	-2.4 (-4.0,-1.0)
Las Animas County, CO	Male	20.5 (17.3,24.2)	20.0 (17.0,23.5)	19.6 (16.6,23.0)	19.7 (16.7,23.2)	19.5 (16.3,23.0)	19.7 (16.5,23.3)	19.2 (16.4,22.1)	19.3 (16.6,22.1)	18.6 (16.2,21.2)	18.5 (15.6,21.2)	17.8 (15.4,20.3)	17.7 (15.3,20.3)	17.1 (14.7,19.5)	17.3 (14.7,20.1)	16.7 (13.0,20.4)	16.2 (13.4,19.2)	15.6 (12.8,18.6)	-1.7 (-3.3,-0.2)
	Female	15.7 (11.7,20.6)	15.6 (12.0,20.0)	15.5 (12.2,19.5)	16.0 (12.8,19.9)	16.5 (13.3,20.3)	17.7 (14.4,21.3)	17.5 (14.5,20.8)	17.6 (14.9,20.6)	16.8 (14.5,19.5)	17.6 (15.3,20.1)	16.3 (14.2,18.7)	16.4 (13.8,19.1)	16.8 (14.0,19.8)	16.6 (13.2,20.1)	16.5 (13.0,19.9)	14.5 (11.5,17.7)	13.9 (11.1,17.0)	-0.8 (-2.9,1.4)
	Both	18.1 (14.6,22.3)	17.8 (14.5,21.7)	17.5 (14.5,21.1)	17.9 (14.7,21.6)	18.0 (14.8,21.6)	18.7 (15.5,22.1)	18.3 (15.5,21.5)	18.4 (15.8,21.4)	17.7 (15.3,20.3)	18.0 (15.6,20.6)	17.0 (14.8,19.4)	17.0 (14.8,19.5)	16.9 (14.5,19.5)	17.0 (14.3,19.7)	16.6 (13.9,19.4)	15.3 (12.4,18.4)	14.8 (11.9,17.7)	-1.3 (-3.1,0.5)
Lincoln County, CO	Male	23.0 (19.6,26.7)	22.4 (19.1,26.1)	22.0 (18.6,25.7)	22.0 (18.6,25.6)	21.1 (17.7,24.6)	21.2 (17.8,24.8)	20.9 (18.0,24.0)	21.1 (18.3,24.2)	20.6 (18.1,23.5)	20.5 (17.6,23.9)	20.4 (17.7,23.6)	20.5 (17.7,23.9)	21.0 (18.1,24.4)	24.2 (20.6,28.3)	22.3 (17.7,27.6)	21.1 (17.3,25.4)	20.3 (16.4,24.5)	-0.8 (-2.3,0.7)
	Female	21.0 (16.2,27.2)	20.8 (16.5,26.1)	20.7 (16.6,25.4)	20.0 (16.0,24.4)	19.8 (16.0,24.0)	19.1 (15.6,22.8)	19.4 (16.1,22.9)	19.7 (16.6,23.0)	19.5 (16.7,22.6)	19.8 (17.0,22.8)	19.7 (16.9,22.8)	19.1 (16.1,22.7)	19.1 (15.9,23.0)	18.7 (14.8,23.1)	15.4 (11.8,19.6)	14.6 (11.1,18.5)	14.0 (10.7,17.7)	-2.5 (-4.8,-0.4)
	Both	22.0 (17.9,27.0)	21.6 (17.8,26.0)	21.3 (17.6,25.4)	21.0 (17.3,25.0)	20.5 (16.9,24.3)	20.1 (16.7,23.7)	20.1 (17.0,23.5)	20.4 (17.5,23.6)	20.0 (17.3,23.1)	20.2 (17.5,23.4)	20.0 (17.3,23.2)	19.8 (17.1,23.1)	20.0 (17.1,23.6)	21.4 (18.2,25.3)	18.8 (15.6,22.8)	17.8 (14.1,21.9)	17.1 (13.5,21.0)	-1.6 (-3.5,0.2)
Logan County, CO	Male	23.6 (20.3,27.3)	23.0 (19.7,26.7)	22.4 (19.2,26.1)	22.3 (19.1,26.0)	21.8 (18.5,25.4)	21.4 (18.2,25.0)	21.6 (18.8,24.7)	22.0 (19.2,25.3)	21.7 (19.1,24.6)	21.7 (18.8,25.1)	21.6 (19.0,24.6)	22.1 (19.6,25.1)	22.2 (19.7,24.9)	21.9 (19.1,25.0)	20.9 (17.2,25.3)	19.7 (16.6,23.2)	18.9 (15.8,22.3)	-1.4 (-2.9,0.0)
	Female	20.7 (16.2,25.7)	20.5 (16.6,24.9)	20.4 (16.8,24.5)	20.3 (16.7,24.4)	20.4 (17.1,24.4)	20.2 (17.1,23.6)	20.7 (17.8,23.8)	20.6 (17.7,24.0)	20.2 (17.7,23.1)	20.0 (17.7,22.8)	20.6 (18.3,23.3)	20.1 (17.3,23.2)	19.4 (16.4,22.8)	19.7 (15.9,23.9)	19.3 (15.4,23.5)	18.9 (15.5,22.7)	18.2 (15.0,21.8)	-0.8 (-2.6,1.2)
	Both	22.1 (18.4,26.2)	21.7 (18.2,25.6)	21.4 (18.0,25.3)	21.2 (18.0,25.2)	21.1 (17.8,24.8)	20.8 (17.7,24.3)	21.1 (18.3,24.2)	21.3 (18.4,24.6)	20.9 (18.4,23.9)	20.9 (18.4,23.8)	21.1 (18.7,23.9)	21.1 (18.7,23.8)	20.8 (18.1,23.6)	20.8 (18.0,23.9)	20.1 (17.0,23.3)	19.3 (16.0,22.9)	18.5 (15.4,22.1)	-1.1 (-2.7,0.6)
Mesa County, CO	Male	23.9 (20.9,26.9)	23.3 (20.4,26.3)	22.9 (20.0,25.9)	22.6 (19.7,25.6)	21.7 (18.9,24.6)	21.8 (19.1,24.6)	19.9 (17.5,22.6)	19.3 (17.0,21.7)	18.7 (16.8,20.9)	19.0 (16.9,21.3)	17.8 (16.1,19.8)	18.6 (16.9,20.6)	18.9 (17.2,21.0)	18.3 (16.3,20.6)	18.0 (15.0,21.1)	17.1 (14.7,19.9)	16.4 (14.1,19.1)	-2.4 (-3.5,-1.1)
	Female	19.6 (15.8,23.9)	19.4 (16.2,23.1)	19.3 (16.1,22.5)	18.8 (15.8,21.9)	18.7 (15.9,21.5)	18.8 (16.2,21.3)	18.3 (15.9,20.8)	18.8 (16.8,20.9)	17.9 (16.2,19.7)	17.8 (16.3,19.5)	17.4 (15.9,19.1)	17.6 (15.6,19.7)	16.5 (14.3,18.9)	16.4 (13.6,19.3)	16.9 (14.1,19.9)	16.8 (14.5,19.6)	16.2 (14.0,18.8)	-1.2 (-2.7,0.4)
	Both	21.7 (18.5,25.3)	21.3 (18.2,24.5)	21.1 (18.2,24.1)	20.7 (17.8,23.7)	20.1 (17.4,23.1)	20.2 (17.7,22.9)	19.1 (16.7,21.6)	19.0 (16.9,21.4)	18.3 (16.5,20.2)	18.4 (16.7,20.3)	17.6 (16.0,19.3)	18.1 (16.4,19.9)	17.7 (15.9,19.8)	17.3 (15.3,19.6)	17.4 (15.3,20.0)	16.9 (14.6,19.7)	16.3 (14.0,19.0)	-1.8 (-3.1,-0.5)
Mineral County, CO	Male	18.3 (15.4,21.5)	17.6 (14.8,20.8)	17.3 (14.5,20.4)	16.8 (14.0,19.8)	15.8 (13.2,18.7)	16.3 (13.5,19.3)	16.0 (13.7,18.6)	15.9 (13.6,18.5)	15.4 (13.4,17.7)	15.3 (13.0,17.9)	14.7 (12.7,17.1)	14.0 (12.0,16.3)	12.0 (10.1,14.2)	12.3 (10.1,14.7)	11.9 (9.1,14.9)	11.6 (9.2,14.1)	11.2 (8.9,13.5)	-3.1 (-4.8,-1.4)
	Female	14.5 (10.7,18.7)	14.3 (10.7,18.0)	14.0 (10.9,17.5)	14.1 (11.0,17.6)	14.4 (11.4,17.9)	14.8 (12.1,18.1)	14.2 (11.6,17.1)	14.0 (11.7,16.9)	13.8 (11.7,16.3)	13.8 (11.7,16.2)	13.3 (11.3,15.7)	13.2 (10.9,16.0)	9.6 (7.4,12.1)	11.7 (8.9,14.9)	10.0 (7.4,13.0)	9.9 (7.4,12.6)	9.6 (7.2,12.1)	-2.6 (-4.9,-0.1)
	Both	16.4 (13.0,19.9)	15.9 (12.8,19.2)	15.6 (12.7,18.9)	15.4 (12.5,18.7)	15.1 (12.3,18.3)	15.5 (12.8,18.7)	15.1 (12.6,17.8)	14.9 (12.7,17.7)	14.6 (12.6,17.0)	14.5 (12.4,16.9)	14.0 (12.0,16.4)	13.6 (11.5,16.1)	10.8 (8.7,13.0)	12.0 (9.6,14.4)	10.9 (8.6,13.4)	10.7 (8.3,13.3)	10.3 (8.0,12.8)	-2.9 (-4.8,-0.8)
Moffat County, CO	Male	26.4 (22.7,30.2)	25.9 (22.3,29.6)	25.5 (21.8,29.2)	25.6 (21.9,29.2)	25.6 (21.7,29.3)	25.4 (21.5,29.0)	24.4 (20.9,27.8)	23.0 (19.8,26.0)	22.9 (20.0,25.8)	22.1 (18.8,25.1)	21.1 (18.4,24.0)	20.3 (17.6,23.0)	20.2 (17.7,23.1)	19.6 (16.8,22.8)	18.9 (14.9,22.8)	19.2 (16.2,22.8)	18.5 (15.5,22.0)	-2.2 (-3.5,-0.8)
	Female	19.8 (15.4,24.8)	19.9 (15.8,24.2)	19.9 (16.2,23.8)	20.6 (16.9,24.6)	19.9 (16.3,23.6)	19.9 (16.5,23.2)	20.9 (17.4,24.5)	21.1 (18.0,24.5)	20.5 (17.6,23.5)	20.8 (18.2,23.8)	21.6 (19.0,24.6)	20.4 (17.6,23.6)	20.5 (17.4,23.9)	19.5 (16.1,23.5)	19.1 (15.5,23.3)	17.4 (14.2,21.3)	16.9 (13.7,20.6)	-1.0 (-2.8,0.9)
	Both	23.1 (19.1,27.3)	22.8 (19.2,26.7)	22.7 (19.1,26.5)	23.0 (19.4,26.9)	22.7 (19.0,26.3)	22.6 (19.0,26.1)	22.7 (19.2,26.1)	22.1 (18.9,25.3)	21.7 (18.7,24.7)	21.4 (18.5,24.3)	21.4 (18.7,24.3)	20.3 (17.9,23.1)	20.4 (17.9,23.4)	19.5 (16.8,22.9)	19.0 (16.1,22.4)	18.3 (15.2,22.1)	17.7 (14.6,21.3)	-1.7 (-3.1,0.0)
Montezuma County, CO	Male	21.4 (18.3,24.6)	20.8 (17.7,23.9)	20.3 (17.3,23.5)	20.1 (17.1,23.4)	19.8 (16.8,23.2)	19.0 (16.1,22.4)	18.5 (16.0,21.4)	18.0 (15.6,20.9)	17.9 (15.7,20.5)	17.2 (14.7,20.1)	16.8 (14.6,19.3)	16.4 (14.2,18.9)	16.2 (13.9,18.7)	16.6 (14.0,19.3)	16.5 (13.1,20.2)	16.3 (13.3,19.4)	15.6 (12.8,18.7)	-2.0 (-3.6,-0.5)
	Female	16.8 (13.0,21.2)	16.6 (13.2,20.5)	16.4 (13.3,20.0)	16.0 (13.0,19.4)	16.2 (13.3,19.6)	16.6 (13.9,20.0)	16.5 (13.9,19.9)	16.3 (13.8,19.3)	16.2 (14.0,18.9)	16.1 (14.1,18.5)	15.3 (13.3,17.6)	14.5 (12.2,17.2)	13.3 (10.7,16.0)	12.8 (9.9,16.0)	11.7 (8.6,14.8)	12.4 (9.7,15.4)	11.9 (9.3,14.7)	-2.2 (-4.3,0.0)
	Both	19.0 (15.7,22.8)	18.6 (15.5,22.0)	18.4 (15.3,21.6)	18.0 (14.9,21.3)	17.9 (15.1,21.2)	17.8 (15.0,21.0)	17.5 (14.9,20.6)	17.1 (14.7,20.0)	17.0 (14.8,19.7)	16.6 (14.5,19.1)	16.0 (14.0,18.3)	15.4 (13.4,17.9)	14.7 (12.4,17.2)	14.7 (12.2,17.4)	14.0 (11.4,16.9)	14.3 (11.4,17.4)	13.7 (11.0,16.6)	-2.0 (-3.8,-0.3)
Montrose County, CO	Male	23.8 (20.5,27.4)	23.2 (20.0,26.7)	22.7 (19.6,26.2)	22.3 (19.2,25.8)	21.5 (18.3,25.0)	21.3 (18.1,24.6)	20.7 (17.9,23.7)	20.1 (17.4,23.0)	19.1 (16.8,21.7)	18.9 (16.3,21.7)	17.5 (15.4,19.9)	16.8 (14.7,19.3)	15.7 (13.7,18.2)	16.3 (13.9,19.1)	16.0 (12.6,19.4)	17.3 (14.5,20.4)	16.6 (13.9,19.7)	-2.3 (-3.6,-0.9)
	Female	18.7 (14.4,23.5)	18.5 (14.7,22.7)	18.3 (15.0,22.2)	18.3 (15.0,21.9)	17.9 (14.9,21.5)	17.7 (14.8,21.0)	18.4 (15.4,21.7)	18.7 (16.0,21.8)	18.3 (16.0,20.8)	18.7 (16.5,21.1)	18.4 (16.4,20.9)	18.4 (15.9,21.3)	16.4 (13.6,19.6)	16.0 (12.6,19.5)	15.4 (12.1,19.1)	16.0 (13.2,19.3)	15.5 (12.7,18.6)	-1.2 (-3.1,0.8)
	Both	21.2 (17.4,25.2)	20.8 (17.4,24.4)	20.5 (17.3,24.1)	20.3 (17.1,23.8)	19.7 (16.6,23.1)	19.5 (16.5,22.7)	19.5 (16.6,22.7)	19.4 (16.7,22.3)	18.7 (16.4,21.3)	18.8 (16.6,21.2)	18.0 (15.9,20.4)	17.6 (15.5,20.1)	16.0 (13.9,18.7)	16.1 (13.7,19.0)	15.7 (13.1,18.6)	16.6 (13.8,19.9)	16.0 (13.3,19.1)	-1.7 (-3.4,-0.2)
Morgan County, CO	Male	24.7 (21.6,28.3)	24.2 (21.1,27.6)	23.7 (20.5,27.2)	24.1 (21.0,27.6)	23.4 (20.1,26.9)	22.6 (19.5,26.0)	22.5 (19.7,25.5)	21.6 (18.8,24.5)	20.3 (17.8,23.0)	20.6 (17.8,23.4)	20.3 (17.7,22.8)	20.2 (17.6,22.8)	19.7 (17.0,22.2)	20.1 (17.3,23.2)	19.2 (15.4,23.3)	19.0 (15.7,22.3)	18.1 (14.9,21.4)	-2.0 (-3.4,-0.6)
	Female	20.2 (16.1,24.9)	19.9 (16.2,24.0)	19.7 (16.4,23.4)	19.3 (16.3,22.8)	19.6 (16.6,22.9)	19.0 (16.2,22.1)	18.3 (15.8,21.0)	17.4 (14.8,20.4)	18.3 (15.7,20.9)	16.7 (14.5,18.9)	17.0 (14.8,19.2)	17.3 (14.7,19.7)	16.7 (13.9,19.4)	15.4 (12.1,18.8)	15.4 (11.9,18.9)	15.2 (12.0,18.5)	14.7 (11.6,17.9)	-2.0 (-3.9,-0.3)
	Both	22.4 (18.8,26.4)	22.0 (18.7,25.7)	21.7 (18.6,25.2)	21.6 (18.6,25.1)	21.4 (18.3,24.8)	20.8 (17.8,24.0)	20.4 (17.7,23.2)	19.5 (16.8,22.4)	19.3 (16.7,22.0)	18.6 (16.2,21.1)	18.6 (16.3,21.0)	18.7 (16.4,21.1)	18.2 (15.6,20.7)	17.7 (15.0,20.5)	17.3 (14.3,20.3)	17.0 (13.8,20.4)	16.4 (13.2,19.6)	-2.0 (-3.6,-0.4)
Otero County, CO	Male	22.3 (19.1,25.6)	21.8 (18.8,24.9)	21.4 (18.2,24.6)	21.5 (18.4,24.7)	21.2 (17.9,24.9)	21.2 (17.8,24.6)	20.5 (17.6,23.6)	20.6 (17.8,23.6)	19.9 (17.3,22.6)	19.6 (16.7,22.5)	19.2 (16.6,21.9)	19.4 (16.8,22.1)	19.7 (17.1,22.5)	20.7 (17.7,23.6)	19.7 (15.7,23.3)	18.3 (15.2,21.5)	17.6 (14.5,20.7)	-1.5 (-2.9,-0.1)
	Female	17.5 (13.5,21.9)	17.2 (13.6,21.2)	17.0 (13.7,20.6)	17.2 (14.0,20.7)	17.8 (14.5,21.5)	17.9 (14.7,21.4)	18.3 (15.3,21.7)	18.8 (15.9,21.9)	18.0 (15.6,20.5)	18.4 (16.0,20.8)	18.6 (16.3,21.0)	17.9 (15.2,20.7)	17.1 (14.1,20.1)	17.3 (13.7,21.0)	16.4 (12.7,20.0)	16.0 (12.8,19.3)	15.4 (12.4,18.5)	-0.8 (-2.7,1.1)
	Both	19.8 (16.3,23.6)	19.5 (16.2,22.9)	19.2 (16.1,22.5)	19.3 (16.2,22.7)	19.5 (16.2,23.1)	19.5 (16.2,23.0)	19.4 (16.5,22.6)	19.7 (16.8,22.7)	18.9 (16.4,21.6)	19.0 (16.5,21.5)	18.9 (16.5,21.3)	18.6 (16.2,21.1)	18.4 (15.9,21.1)	19.0 (16.2,21.7)	18.0 (15.1,20.9)	17.1 (14.0,20.3)	16.5 (13.4,19.6)	-1.2 (-2.8,0.4)
Ouray County, CO	Male	16.7 (13.9,19.8)	16.2 (13.5,19.2)	15.7 (13.1,18.6)	15.3 (12.7,18.1)	14.6 (12.1,17.5)	14.8 (12.2,17.7)	14.5 (12.4,17.0)	14.4 (12.3,16.8)	14.1 (12.1,16.3)	13.7 (11.6,16.1)	13.2 (11.3,15.4)	12.9 (11.1,15.2)	12.2 (10.4,14.4)	11.4 (9.5,13.9)	10.6 (8.0,13.6)	10.9 (8.8,13.5)	10.4 (8.4,13.0)	-2.9 (-4.7,-1.2)
	Female	13.7 (10.2,18.0)	13.5 (10.3,17.3)	13.3 (10.4,16.8)	13.3 (10.4,16.8)	13.3 (10.5,16.6)	13.4 (10.8,16.4)	13.5 (10.9,16.5)	12.6 (10.4,15.2)	12.3 (10.3,14.5)	12.5 (10.6,14.6)	11.8 (10.1,13.9)	11.5 (9.6,13.8)	11.6 (9.5,14.0)	11.9 (9.3,14.9)	9.6 (7.1,12.3)	9.6 (7.5,12.7)	9.4 (7.3,12.3)	-2.4 (-4.7,0.0)
	Both	15.1 (12.0,18.7)	14.8 (11.9,18.2)	14.5 (11.7,17.7)	14.3 (11.5,17.4)	13.9 (11.2,17.0)	14.1 (11.5,17.0)	14.0 (11.7,16.7)	13.5 (11.3,15.9)	13.2 (11.1,15.4)	13.1 (11.1,15.3)	12.5 (10.7,14.6)	12.2 (10.4,14.4)	11.9 (10.0,14.2)	11.6 (9.6,14.1)	10.1 (8.1,12.8)	10.2 (8.1,13.1)	9.9 (7.9,12.6)	-2.7 (-4.7,-0.7)
Park County, CO	Male	19.3 (16.3,22.5)	18.7 (15.8,21.9)	18.3 (15.4,21.4)	17.4 (14.6,20.4)	17.0 (14.3,20.2)	17.2 (14.4,20.4)	17.4 (15.0,20.2)	17.1 (14.7,19.9)	17.1 (14.9,19.8)	16.3 (13.9,19.1)	16.5 (14.3,19.1)	16.4 (14.1,18.9)	15.7 (13.5,18.1)	14.9 (12.5,17.4)	14.9 (11.6,18.1)	14.3 (11.9,17.0)	13.7 (11.4,16.4)	-2.1 (-3.7,-0.6)
	Female	16.5 (12.4,21.2)	16.3 (12.7,20.7)	16.2 (12.8,20.0)	16.0 (12.8,19.6)	15.7 (12.7,19.3)	15.7 (13.0,19.2)	14.9 (12.5,18.1)	13.3 (11.2,16.0)	13.4 (11.5,15.7)	13.5 (11.6,15.7)	13.1 (11.1,15.3)	13.6 (11.4,16.1)	13.4 (10.9,16.1)	13.6 (10.4,16.9)	12.5 (9.3,15.7)	13.5 (10.8,16.6)	13.0 (10.4,15.9)	-1.5 (-3.6,0.8)
	Both	17.9 (14.4,21.8)	17.5 (14.3,21.1)	17.2 (14.2,20.6)	16.6 (13.7,20.0)	16.4 (13.5,19.8)	16.4 (13.8,19.7)	16.1 (13.7,19.1)	15.2 (13.0,17.9)	15.2 (13.2,17.7)	14.9 (12.8,17.3)	14.8 (12.7,17.1)	14.9 (12.7,17.3)	14.5 (12.4,16.8)	14.2 (11.9,16.8)	13.7 (11.3,16.3)	13.9 (11.3,16.8)	13.4 (10.9,16.1)	-1.8 (-3.7,0.0)
Phillips County, CO	Male	20.8 (17.7,24.3)	20.3 (17.3,23.6)	19.7 (16.8,23.0)	19.1 (16.2,22.3)	18.5 (15.6,21.8)	18.9 (15.9,22.2)	18.5 (16.0,21.3)	18.6 (16.1,21.3)	18.7 (16.2,21.2)	18.4 (15.6,21.2)	18.2 (15.7,20.9)	18.7 (16.2,21.5)	17.5 (15.0,20.2)	16.2 (13.5,19.1)	15.8 (12.3,19.7)	15.5 (12.7,18.7)	15.0 (12.2,18.1)	-2.1 (-3.7,-0.5)
	Female	16.8 (12.8,21.7)	16.4 (12.9,20.8)	16.2 (12.9,20.0)	16.1 (13.0,19.7)	15.8 (12.8,19.3)	16.3 (13.4,19.4)	16.4 (13.7,19.3)	17.0 (14.4,19.8)	16.7 (14.4,19.3)	17.2 (14.9,19.7)	17.7 (15.3,20.4)	17.9 (15.0,21.1)	16.6 (13.5,20.0)	15.5 (11.6,19.5)	14.8 (11.1,18.8)	15.0 (11.8,18.8)	14.3 (11.3,18.0)	-1.0 (-3.2,1.2)
	Both	18.8 (15.3,22.8)	18.3 (15.1,22.0)	17.9 (14.9,21.5)	17.5 (14.6,20.9)	17.1 (14.1,20.5)	17.6 (14.7,20.7)	17.4 (14.8,20.3)	17.8 (15.2,20.5)	17.7 (15.3,20.2)	17.8 (15.3,20.3)	17.9 (15.5,20.6)	18.3 (15.7,21.2)	17.0 (14.3,20.0)	15.8 (13.0,19.0)	15.3 (12.5,18.6)	15.2 (12.2,18.8)	14.6 (11.7,18.0)	-1.5 (-3.5,0.2)
Pitkin County, CO	Male	13.8 (11.8,16.7)	13.4 (11.4,16.1)	13.1 (11.0,15.7)	12.8 (10.8,15.4)	12.3 (10.2,14.9)	11.8 (9.9,14.4)	11.0 (9.3,13.1)	10.7 (9.1,12.6)	10.1 (8.6,11.7)	10.2 (8.6,12.2)	9.7 (8.2,11.4)	9.7 (8.1,11.4)	9.3 (7.8,11.1)	9.9 (8.0,12.0)	10.1 (7.8,12.7)	9.8 (7.9,12.0)	9.4 (7.5,11.5)	-2.4 (-4.2,-0.8)
	Female	10.1 (7.7,13.5)	10.0 (7.8,13.1)	9.9 (7.9,12.8)	9.9 (8.0,12.6)	10.0 (7.9,12.6)	10.3 (8.3,12.9)	9.5 (7.8,11.8)	9.0 (7.4,10.9)	8.7 (7.3,10.3)	8.7 (7.3,10.2)	8.2 (6.9,9.7)	8.4 (6.8,10.1)	8.2 (6.5,10.1)	8.5 (6.4,10.8)	8.0 (5.9,10.3)	8.0 (6.1,10.3)	7.6 (5.8,9.8)	-1.8 (-4.1,0.5)
	Both	12.0 (9.7,15.0)	11.7 (9.6,14.6)	11.5 (9.5,14.2)	11.4 (9.4,14.0)	11.1 (9.1,13.8)	11.1 (9.1,13.6)	10.3 (8.6,12.4)	9.8 (8.3,11.7)	9.4 (8.0,11.0)	9.4 (8.0,11.0)	8.9 (7.6,10.5)	9.0 (7.6,10.7)	8.7 (7.2,10.5)	9.2 (7.5,11.1)	9.0 (7.2,11.2)	8.9 (7.0,11.1)	8.5 (6.6,10.7)	-2.1 (-4.2,-0.2)
Prowers County, CO	Male	23.6 (20.4,27.4)	23.0 (19.9,26.6)	22.5 (19.5,26.0)	22.5 (19.4,25.9)	21.7 (18.4,25.4)	21.8 (18.5,25.4)	20.8 (18.1,23.8)	20.7 (18.0,23.7)	20.0 (17.4,22.6)	19.4 (16.8,22.3)	18.6 (16.2,21.2)	18.5 (16.0,21.1)	17.4 (14.9,20.0)	16.5 (13.8,19.6)	17.2 (13.5,21.2)	17.1 (14.1,20.6)	16.3 (13.4,19.7)	-2.3 (-4.0,-0.8)
	Female	19.1 (14.9,24.3)	18.8 (15.0,23.4)	18.5 (15.0,22.7)	18.7 (15.3,22.6)	18.6 (15.3,22.4)	18.2 (15.1,21.7)	18.5 (15.5,21.8)	18.1 (15.4,21.0)	17.7 (15.3,20.2)	16.7 (14.4,18.9)	16.2 (13.9,18.6)	15.3 (12.7,18.3)	15.0 (12.1,18.3)	14.5 (10.8,18.5)	14.9 (11.4,18.9)	14.7 (11.6,18.6)	14.2 (11.2,17.8)	-1.9 (-4.0,0.3)
	Both	21.3 (17.7,25.7)	20.9 (17.5,24.9)	20.5 (17.2,24.3)	20.5 (17.3,24.3)	20.1 (16.8,23.9)	20.0 (16.9,23.5)	19.6 (16.7,22.8)	19.4 (16.6,22.4)	18.8 (16.3,21.4)	18.0 (15.7,20.5)	17.4 (15.0,19.7)	16.9 (14.5,19.5)	16.2 (13.6,19.1)	15.5 (12.7,18.7)	16.0 (13.3,19.5)	15.9 (12.8,19.5)	15.2 (12.3,18.8)	-2.1 (-4.0,-0.3)
Pueblo County, CO	Male	22.5 (19.5,25.9)	22.0 (19.0,25.3)	21.6 (18.7,25.0)	22.0 (18.9,25.4)	22.1 (19.1,25.6)	22.5 (19.4,25.9)	20.9 (18.3,23.6)	20.4 (18.0,23.0)	19.2 (17.1,21.5)	19.5 (17.3,22.0)	20.9 (19.0,23.1)	21.3 (19.4,23.5)	21.9 (20.0,24.1)	21.6 (19.5,24.0)	20.8 (17.6,24.0)	17.1 (14.6,19.8)	16.4 (13.9,19.1)	-2.0 (-3.3,-0.7)
	Female	19.6 (15.9,23.9)	19.3 (16.0,22.8)	18.9 (15.9,22.3)	18.4 (15.4,21.6)	19.4 (16.5,22.7)	20.3 (17.6,23.4)	19.7 (17.2,22.5)	19.4 (17.3,21.8)	19.7 (17.8,21.8)	19.4 (17.7,21.4)	19.2 (17.5,21.0)	18.5 (16.4,20.5)	17.9 (15.6,20.3)	17.0 (14.2,19.8)	16.6 (13.7,19.6)	15.8 (13.4,18.5)	15.2 (12.9,17.7)	-1.6 (-3.2,0.0)
	Both	21.0 (17.8,24.7)	20.6 (17.6,24.0)	20.3 (17.3,23.5)	20.1 (17.1,23.4)	20.7 (17.8,24.1)	21.4 (18.6,24.6)	20.3 (17.8,23.0)	19.9 (17.7,22.4)	19.4 (17.5,21.7)	19.5 (17.6,21.6)	20.0 (18.3,22.0)	19.9 (18.0,21.8)	19.9 (17.9,21.9)	19.2 (17.1,21.5)	18.6 (16.4,21.0)	16.4 (14.0,19.1)	15.8 (13.4,18.4)	-1.8 (-3.2,-0.4)
Rio Blanco County, CO	Male	20.3 (17.2,23.7)	19.8 (16.8,23.0)	19.3 (16.4,22.6)	18.9 (16.0,22.1)	18.7 (15.7,22.1)	18.9 (15.9,22.3)	18.3 (15.8,21.2)	17.7 (15.2,20.4)	17.1 (14.9,19.7)	16.7 (14.4,19.7)	16.0 (13.8,18.6)	15.1 (12.9,17.8)	16.1 (13.7,18.8)	14.7 (12.3,18.0)	14.6 (11.2,18.5)	15.1 (12.4,18.5)	14.3 (11.7,17.6)	-2.2 (-3.8,-0.6)
	Female	16.2 (12.3,21.1)	16.0 (12.5,20.1)	15.9 (12.5,19.6)	16.7 (13.5,20.5)	16.2 (13.1,19.8)	15.8 (13.0,19.1)	15.0 (12.3,18.1)	14.7 (12.4,17.4)	14.2 (12.1,16.7)	14.1 (12.1,16.4)	14.0 (11.9,16.3)	13.9 (11.4,16.5)	15.1 (12.3,18.1)	13.8 (10.5,17.3)	13.5 (10.3,16.8)	12.5 (9.7,16.1)	12.0 (9.4,15.4)	-1.9 (-4.1,0.4)
	Both	18.2 (14.7,22.2)	17.9 (14.6,21.5)	17.6 (14.5,21.1)	17.8 (14.7,21.3)	17.4 (14.4,20.9)	17.3 (14.5,20.6)	16.6 (14.1,19.6)	16.2 (13.8,18.8)	15.6 (13.5,18.2)	15.4 (13.3,17.9)	15.0 (12.9,17.4)	14.5 (12.3,17.0)	15.6 (13.1,18.4)	14.3 (11.7,17.2)	14.0 (11.4,17.3)	13.8 (11.1,17.2)	13.2 (10.5,16.5)	-2.0 (-4.0,-0.1)
Rio Grande County, CO	Male	19.6 (16.5,22.7)	19.1 (16.2,22.2)	18.6 (15.8,21.7)	18.8 (15.8,21.9)	17.9 (15.0,21.1)	18.0 (15.0,21.2)	17.6 (15.0,20.3)	17.7 (15.1,20.3)	17.5 (15.1,20.0)	18.0 (15.2,20.8)	17.9 (15.4,20.6)	18.3 (15.7,21.0)	18.0 (15.6,20.7)	17.3 (14.6,20.3)	15.5 (11.8,19.1)	15.2 (12.4,18.2)	14.5 (11.7,17.4)	-1.9 (-3.5,-0.3)
	Female	14.0 (10.6,18.0)	13.9 (10.8,17.4)	13.8 (10.9,17.1)	14.2 (11.2,17.5)	14.7 (11.7,18.0)	15.0 (12.2,18.2)	14.8 (12.2,17.8)	14.4 (12.0,17.1)	13.9 (11.8,16.2)	13.9 (11.9,16.1)	13.4 (11.4,15.5)	12.9 (10.7,15.5)	13.3 (10.8,16.2)	12.8 (9.8,16.0)	11.6 (8.6,14.7)	11.6 (8.9,14.5)	11.1 (8.6,13.9)	-1.4 (-3.7,0.9)
	Both	16.7 (13.6,20.1)	16.5 (13.5,19.7)	16.2 (13.3,19.3)	16.5 (13.5,19.7)	16.3 (13.4,19.5)	16.5 (13.7,19.6)	16.2 (13.6,19.0)	16.0 (13.5,18.6)	15.7 (13.4,18.0)	15.9 (13.6,18.3)	15.6 (13.4,18.0)	15.5 (13.3,18.0)	15.6 (13.3,18.3)	15.0 (12.5,17.7)	13.5 (11.0,16.2)	13.4 (10.6,16.3)	12.8 (10.1,15.6)	-1.7 (-3.6,0.2)
Routt County, CO	Male	16.5 (13.9,19.3)	16.1 (13.6,18.7)	15.7 (13.2,18.3)	15.4 (13.0,18.0)	15.3 (12.8,17.9)	15.1 (12.7,17.6)	14.5 (12.4,16.7)	14.0 (11.9,16.0)	13.4 (11.6,15.3)	12.8 (10.9,14.7)	12.2 (10.5,14.1)	11.3 (9.8,13.1)	11.3 (9.7,13.0)	10.1 (8.3,12.0)	10.2 (7.8,12.8)	11.2 (9.3,13.4)	10.7 (8.8,12.8)	-2.7 (-4.3,-1.1)
	Female	13.1 (10.0,16.8)	12.9 (10.1,16.3)	12.8 (10.2,15.8)	12.7 (10.1,15.5)	12.4 (9.9,15.0)	12.7 (10.4,15.1)	12.1 (9.9,14.4)	12.1 (10.1,14.3)	11.6 (9.8,13.5)	11.6 (9.9,13.5)	11.0 (9.5,12.7)	11.5 (9.6,13.5)	10.9 (9.0,13.1)	9.9 (7.8,12.4)	10.0 (7.8,12.5)	9.2 (7.3,11.4)	8.8 (7.0,10.9)	-2.5 (-4.6,-0.3)
	Both	14.8 (12.0,18.0)	14.5 (11.9,17.4)	14.2 (11.7,17.0)	14.0 (11.5,16.8)	13.8 (11.4,16.4)	13.9 (11.5,16.3)	13.3 (11.1,15.5)	13.0 (11.0,15.1)	12.5 (10.7,14.4)	12.2 (10.5,14.0)	11.6 (10.0,13.4)	11.4 (9.8,13.1)	11.1 (9.4,12.9)	10.0 (8.3,12.0)	10.1 (8.3,12.2)	10.2 (8.3,12.4)	9.7 (7.9,11.8)	-2.6 (-4.4,-0.9)
Saguache County, CO	Male	20.3 (17.2,23.7)	19.9 (16.8,23.1)	19.6 (16.6,22.8)	19.2 (16.2,22.4)	18.6 (15.4,21.9)	17.8 (14.7,21.0)	17.5 (14.9,20.2)	17.5 (15.0,20.1)	17.2 (14.7,19.7)	16.7 (14.1,19.5)	16.1 (13.6,18.6)	16.0 (13.5,18.7)	15.6 (13.1,18.2)	15.2 (12.4,18.2)	15.8 (12.1,20.0)	16.1 (13.1,19.4)	15.7 (12.7,18.9)	-1.6 (-3.3,-0.1)
	Female	14.4 (10.9,18.6)	14.2 (11.1,18.1)	14.1 (11.1,17.6)	14.7 (11.7,18.1)	15.2 (12.1,18.6)	15.9 (13.1,19.2)	15.6 (12.9,18.7)	14.8 (12.3,17.4)	14.5 (12.3,16.8)	14.7 (12.6,17.1)	14.6 (12.4,16.9)	14.4 (11.9,17.3)	14.3 (11.6,17.4)	13.9 (10.7,17.6)	13.1 (9.8,16.7)	13.0 (10.1,16.4)	12.6 (9.8,15.9)	-0.8 (-3.0,1.4)
	Both	17.3 (14.1,21.0)	17.0 (14.0,20.4)	16.8 (13.9,20.1)	16.9 (14.0,20.2)	16.9 (13.7,20.2)	16.8 (13.8,20.0)	16.5 (13.8,19.4)	16.1 (13.7,18.7)	15.8 (13.5,18.2)	15.7 (13.4,18.2)	15.3 (13.1,17.8)	15.2 (12.9,17.8)	14.9 (12.4,17.7)	14.5 (11.8,17.6)	14.4 (11.6,17.6)	14.6 (11.6,17.9)	14.1 (11.2,17.4)	-1.3 (-3.2,0.5)
San Juan County, CO	Male	15.6 (13.2,18.2)	15.0 (12.6,17.7)	14.6 (12.2,17.4)	14.1 (11.9,16.8)	13.8 (11.4,16.4)	13.7 (11.3,16.3)	12.9 (10.8,15.1)	12.9 (10.8,15.1)	13.1 (11.1,15.1)	12.3 (10.2,14.6)	12.1 (10.1,14.2)	12.0 (9.9,14.2)	14.9 (12.4,17.5)	16.4 (13.6,19.4)	14.9 (11.4,18.7)	14.6 (11.9,17.7)	14.0 (11.4,17.1)	-0.7 (-2.3,1.0)
	Female	12.6 (9.6,16.4)	12.3 (9.7,15.5)	12.1 (9.6,15.1)	12.1 (9.6,15.1)	12.2 (9.7,15.1)	12.4 (10.0,15.0)	11.7 (9.5,14.0)	11.6 (9.7,13.8)	11.4 (9.7,13.3)	11.0 (9.2,13.1)	10.7 (8.8,12.9)	10.2 (8.0,12.9)	13.5 (10.8,16.8)	16.0 (12.6,20.0)	13.5 (10.3,17.4)	13.4 (10.4,16.8)	12.9 (10.0,16.1)	0.1 (-2.0,2.5)
	Both	14.1 (11.5,17.1)	13.6 (11.2,16.5)	13.3 (10.9,16.1)	13.1 (10.7,15.8)	13.0 (10.6,15.8)	13.0 (10.7,15.7)	12.3 (10.2,14.6)	12.3 (10.3,14.4)	12.2 (10.4,14.2)	11.7 (9.8,13.6)	11.4 (9.4,13.4)	11.1 (9.1,13.4)	14.2 (11.7,17.1)	16.2 (13.4,19.5)	14.2 (11.4,17.2)	14.0 (11.1,17.3)	13.4 (10.7,16.6)	-0.3 (-2.2,1.6)
San Miguel County, CO	Male	14.4 (12.0,17.1)	13.9 (11.6,16.5)	13.5 (11.2,16.1)	12.9 (10.7,15.5)	12.2 (10.0,14.7)	11.9 (9.8,14.4)	11.8 (10.0,13.9)	11.6 (9.8,13.7)	11.3 (9.6,13.2)	11.1 (9.4,13.2)	10.5 (9.0,12.5)	10.0 (8.4,12.0)	9.3 (7.8,11.3)	9.4 (7.6,11.7)	8.9 (6.6,11.7)	9.5 (7.6,11.9)	9.0 (7.2,11.4)	-3.0 (-4.7,-1.2)
	Female	9.8 (7.3,13.1)	9.7 (7.3,12.5)	9.6 (7.4,12.2)	9.5 (7.4,12.0)	9.6 (7.5,12.1)	10.1 (8.0,12.6)	10.5 (8.4,13.0)	10.7 (8.6,13.1)	11.0 (9.1,13.2)	10.8 (9.1,13.0)	10.7 (9.0,12.7)	10.9 (9.0,13.1)	9.4 (7.6,11.6)	8.0 (5.9,10.3)	7.2 (5.2,9.5)	7.5 (5.7,9.9)	7.2 (5.5,9.4)	-2.0 (-4.5,0.4)
	Both	12.1 (9.7,15.0)	11.8 (9.5,14.4)	11.5 (9.3,14.0)	11.2 (9.0,13.7)	10.9 (8.8,13.4)	11.0 (8.9,13.5)	11.1 (9.1,13.4)	11.2 (9.2,13.3)	11.1 (9.4,13.1)	11.0 (9.3,13.0)	10.6 (9.0,12.6)	10.5 (8.8,12.5)	9.4 (7.7,11.3)	8.6 (7.0,10.7)	8.0 (6.3,10.4)	8.4 (6.6,10.9)	8.1 (6.3,10.4)	-2.5 (-4.6,-0.5)
Sedgwick County, CO	Male	22.7 (19.2,26.7)	22.1 (18.6,25.8)	21.6 (18.1,25.4)	21.2 (17.8,25.0)	20.5 (17.1,24.4)	20.6 (17.0,24.5)	20.2 (17.3,23.4)	21.0 (18.0,24.2)	20.4 (17.7,23.3)	19.9 (17.1,23.3)	19.2 (16.7,22.3)	19.3 (16.6,22.5)	19.2 (16.5,22.2)	18.6 (15.7,22.1)	18.9 (15.1,23.5)	18.0 (14.8,21.8)	17.2 (14.1,21.0)	-1.7 (-3.4,-0.1)
	Female	18.6 (14.1,24.2)	18.3 (14.0,23.3)	18.1 (14.1,22.8)	18.3 (14.4,22.7)	18.0 (14.4,22.4)	17.9 (14.6,21.8)	18.3 (15.2,21.8)	17.9 (15.1,21.3)	17.0 (14.7,19.9)	17.7 (15.2,20.5)	17.9 (15.2,20.7)	17.9 (14.8,21.3)	17.5 (14.2,21.3)	17.2 (13.0,21.7)	16.9 (12.9,21.6)	16.6 (13.1,21.0)	15.9 (12.5,20.0)	-1.0 (-3.2,1.3)
	Both	20.6 (16.5,25.3)	20.1 (16.4,24.6)	19.8 (16.1,23.9)	19.7 (16.1,23.8)	19.3 (15.8,23.4)	19.2 (15.9,23.1)	19.2 (16.2,22.7)	19.4 (16.6,22.7)	18.7 (16.2,21.6)	18.8 (16.3,21.8)	18.6 (15.9,21.4)	18.6 (15.9,21.5)	18.3 (15.4,21.5)	17.9 (14.7,21.4)	17.9 (14.7,21.5)	17.3 (13.9,21.4)	16.6 (13.3,20.5)	-1.4 (-3.2,0.5)
Summit County, CO	Male	15.3 (12.9,18.2)	14.9 (12.6,17.7)	14.6 (12.3,17.3)	14.0 (11.8,16.7)	14.1 (11.7,16.9)	13.7 (11.4,16.4)	13.8 (11.9,16.2)	13.5 (11.6,15.8)	13.7 (11.9,15.8)	12.9 (11.1,15.1)	13.2 (11.4,15.3)	12.5 (10.8,14.6)	12.2 (10.4,14.3)	11.7 (9.8,14.0)	11.2 (8.5,14.1)	11.3 (9.1,13.9)	10.8 (8.8,13.4)	-2.2 (-3.8,-0.5)
	Female	12.4 (9.4,16.3)	12.3 (9.6,15.8)	12.2 (9.7,15.5)	12.1 (9.6,15.2)	11.8 (9.5,14.7)	11.7 (9.5,14.5)	10.8 (8.9,13.3)	9.9 (8.2,12.0)	9.3 (7.8,11.0)	9.0 (7.7,10.6)	8.5 (7.3,10.1)	8.7 (7.2,10.6)	8.3 (6.6,10.3)	8.3 (6.3,10.8)	7.7 (5.7,10.2)	8.1 (6.2,10.5)	7.8 (6.1,10.2)	-2.9 (-5.1,-0.5)
	Both	13.8 (11.2,17.1)	13.6 (11.1,16.7)	13.3 (10.9,16.4)	13.0 (10.7,16.0)	12.9 (10.6,15.8)	12.7 (10.5,15.4)	12.3 (10.4,14.7)	11.6 (9.8,13.8)	11.5 (9.8,13.4)	10.9 (9.4,12.7)	10.8 (9.3,12.6)	10.6 (9.0,12.5)	10.2 (8.6,12.2)	10.0 (8.3,12.2)	9.4 (7.5,11.8)	9.7 (7.7,12.2)	9.3 (7.4,11.8)	-2.5 (-4.3,-0.5)
Teller County, CO	Male	18.9 (15.8,22.2)	18.4 (15.6,21.4)	18.0 (15.1,21.0)	16.8 (14.1,19.6)	16.8 (13.9,19.8)	16.7 (13.9,19.9)	16.7 (14.4,19.2)	16.7 (14.6,19.2)	16.4 (14.4,18.6)	16.2 (13.9,18.8)	16.1 (14.1,18.3)	16.0 (13.9,18.5)	17.1 (14.9,19.7)	18.1 (15.6,21.1)	18.0 (14.6,21.7)	16.4 (13.8,19.8)	15.7 (13.2,19.0)	-1.1 (-2.6,0.5)
	Female	16.6 (12.7,21.5)	16.5 (12.8,20.6)	16.3 (12.8,20.2)	15.3 (12.3,18.7)	15.3 (12.3,18.5)	15.1 (12.5,18.0)	16.2 (14.2,18.3)	15.9 (14.1,17.8)	15.9 (14.2,17.8)	16.4 (14.6,18.4)	16.3 (14.3,18.6)	15.6 (12.9,18.7)	14.9 (12.0,18.4)	17.3 (13.7,21.7)	16.1 (12.4,20.4)	18.0 (14.9,21.9)	17.3 (14.3,21.0)	0.2 (-1.8,2.4)
	Both	17.7 (14.2,21.7)	17.4 (14.0,21.0)	17.2 (14.2,20.4)	16.1 (13.1,19.1)	16.0 (13.1,19.2)	15.9 (13.2,18.8)	16.4 (14.3,18.8)	16.3 (14.3,18.4)	16.1 (14.3,18.2)	16.3 (14.5,18.4)	16.2 (14.3,18.3)	15.8 (13.6,18.3)	16.0 (13.6,18.8)	17.7 (15.1,20.9)	17.0 (14.4,20.4)	17.2 (14.4,20.9)	16.5 (13.8,20.0)	-0.4 (-2.2,1.5)
Washington County, CO	Male	22.1 (18.9,25.7)	21.7 (18.5,25.3)	21.1 (18.0,24.8)	21.3 (18.2,24.9)	20.4 (17.2,24.1)	20.0 (16.9,23.7)	19.9 (17.3,23.1)	20.1 (17.5,23.2)	19.3 (17.0,22.2)	19.3 (16.5,22.6)	18.9 (16.4,21.7)	19.0 (16.5,21.9)	18.1 (15.6,21.1)	18.1 (15.4,21.5)	18.1 (14.2,22.5)	17.6 (14.5,21.1)	16.9 (13.9,20.4)	-1.7 (-3.2,-0.2)
	Female	19.4 (15.0,24.7)	19.2 (15.3,24.0)	19.1 (15.3,23.4)	18.8 (15.3,23.0)	18.6 (15.1,22.8)	18.2 (15.1,22.0)	18.0 (15.2,21.5)	17.9 (15.2,21.2)	18.0 (15.7,20.9)	17.6 (15.4,20.3)	17.6 (15.2,20.2)	17.6 (14.7,20.7)	16.9 (13.8,20.3)	15.5 (11.9,19.5)	15.5 (12.0,19.5)	14.8 (11.6,18.7)	14.2 (11.2,17.9)	-2.0 (-4.1,0.1)
	Both	20.7 (17.1,25.1)	20.4 (16.9,24.4)	20.1 (16.7,24.0)	20.0 (16.7,24.0)	19.5 (16.2,23.5)	19.1 (16.0,22.8)	18.9 (16.2,22.2)	19.0 (16.4,22.2)	18.7 (16.3,21.5)	18.5 (16.1,21.4)	18.2 (15.9,20.9)	18.3 (15.8,21.2)	17.5 (14.7,20.5)	16.8 (13.9,20.0)	16.8 (13.9,20.3)	16.2 (13.0,19.9)	15.5 (12.5,19.1)	-1.8 (-3.6,-0.1)
Yuma County, CO	Male	23.2 (20.0,26.8)	22.6 (19.5,26.0)	22.0 (18.9,25.4)	21.4 (18.4,24.8)	20.8 (17.7,24.4)	21.0 (17.8,24.5)	20.2 (17.6,23.2)	20.3 (17.6,23.2)	20.0 (17.4,22.7)	19.6 (16.8,22.7)	18.8 (16.3,21.6)	18.9 (16.3,21.9)	18.8 (16.2,21.8)	18.2 (15.2,21.5)	17.2 (13.3,21.5)	16.9 (14.0,20.5)	16.3 (13.4,19.8)	-2.2 (-3.7,-0.6)
	Female	18.7 (14.4,23.4)	18.3 (14.4,22.5)	18.0 (14.6,22.0)	17.9 (14.7,21.7)	17.5 (14.3,21.2)	17.5 (14.7,21.1)	16.9 (14.3,20.0)	17.4 (14.7,20.6)	16.5 (14.2,19.1)	16.0 (13.8,18.4)	15.2 (13.0,17.6)	14.7 (12.0,17.8)	15.0 (12.0,18.5)	14.9 (11.4,19.3)	14.6 (11.0,18.8)	14.5 (11.5,18.4)	14.2 (11.2,17.9)	-1.7 (-3.8,0.6)
	Both	20.9 (17.2,24.9)	20.4 (17.1,24.2)	20.0 (16.9,23.6)	19.6 (16.5,23.2)	19.1 (16.0,22.7)	19.2 (16.3,22.6)	18.5 (15.9,21.5)	18.8 (16.2,21.8)	18.2 (15.8,20.9)	17.8 (15.3,20.4)	17.0 (14.6,19.6)	16.8 (14.3,19.5)	16.9 (14.2,19.9)	16.5 (13.6,19.7)	15.9 (12.9,19.3)	15.7 (12.7,19.4)	15.2 (12.2,18.8)	-2.0 (-3.8,0.0)
Fairfield County, CT	Male	17.2 (15.3,19.1)	16.7 (15.0,18.4)	16.2 (14.5,17.9)	15.7 (14.2,17.3)	15.6 (14.1,17.1)	15.0 (13.6,16.4)	14.5 (13.2,15.8)	14.6 (13.4,15.8)	14.5 (13.4,15.5)	13.7 (12.6,14.9)	12.7 (11.9,13.7)	12.0 (11.1,13.0)	11.5 (10.5,12.6)	10.8 (9.7,12.0)	10.1 (8.5,11.7)	10.6 (9.2,12.1)	10.0 (8.7,11.4)	-3.4 (-4.5,-2.4)
	Female	17.2 (15.2,19.5)	16.7 (15.0,18.5)	16.3 (14.8,17.8)	15.5 (14.1,16.8)	15.5 (14.2,16.8)	14.5 (13.4,15.6)	13.3 (12.4,14.2)	12.8 (12.0,13.6)	12.5 (11.8,13.2)	11.8 (11.1,12.6)	11.2 (10.4,12.0)	11.0 (9.9,12.0)	10.2 (9.0,11.4)	9.7 (8.2,11.1)	9.0 (7.4,10.4)	9.5 (8.3,10.8)	9.0 (7.9,10.2)	-4.0 (-5.2,-3.0)
	Both	17.2 (15.3,19.2)	16.7 (15.0,18.4)	16.2 (14.7,17.8)	15.6 (14.2,17.0)	15.5 (14.1,16.9)	14.8 (13.5,16.0)	13.9 (12.8,15.0)	13.7 (12.7,14.7)	13.5 (12.6,14.3)	12.8 (12.0,13.6)	11.9 (11.1,12.8)	11.5 (10.6,12.4)	10.8 (9.8,11.8)	10.2 (9.1,11.4)	9.5 (8.3,10.8)	10.0 (8.7,11.4)	9.5 (8.3,10.8)	-3.7 (-4.8,-2.7)
Hartford County, CT	Male	20.1 (18.1,22.3)	19.7 (17.9,21.6)	19.2 (17.5,21.1)	19.3 (17.7,21.0)	18.7 (17.2,20.3)	18.8 (17.2,20.4)	18.8 (17.4,20.2)	18.3 (16.9,19.6)	17.5 (16.3,18.7)	16.6 (15.2,17.9)	16.4 (15.4,17.6)	15.7 (14.6,16.9)	15.3 (14.0,16.5)	14.7 (13.4,16.1)	14.8 (12.9,16.7)	14.7 (13.0,16.3)	13.9 (12.4,15.5)	-2.3 (-3.3,-1.4)
	Female	16.8 (14.7,19.5)	16.7 (15.0,18.8)	16.6 (15.1,18.2)	16.9 (15.5,18.3)	16.5 (15.2,17.8)	16.6 (15.4,17.7)	16.2 (15.2,17.2)	15.4 (14.6,16.3)	14.9 (14.1,15.7)	14.3 (13.5,15.1)	13.4 (12.5,14.3)	12.8 (11.5,13.9)	11.8 (10.4,13.1)	11.8 (10.2,13.3)	10.9 (9.2,12.6)	11.6 (10.3,13.0)	11.1 (9.8,12.3)	-2.6 (-3.8,-1.6)
	Both	18.5 (16.4,20.8)	18.2 (16.4,20.1)	17.9 (16.3,19.6)	18.1 (16.6,19.6)	17.6 (16.2,19.1)	17.7 (16.3,19.0)	17.5 (16.3,18.7)	16.8 (15.7,17.9)	16.2 (15.2,17.2)	15.4 (14.5,16.4)	14.9 (14.0,15.9)	14.2 (13.2,15.2)	13.5 (12.4,14.6)	13.2 (12.0,14.5)	12.9 (11.5,14.2)	13.1 (11.7,14.6)	12.5 (11.1,13.9)	-2.5 (-3.5,-1.5)
Litchfield County, CT	Male	20.9 (18.1,23.9)	20.5 (17.8,23.3)	20.1 (17.5,22.8)	19.5 (17.1,22.0)	19.8 (17.3,22.3)	18.9 (16.6,21.4)	18.5 (16.4,20.5)	17.9 (16.0,19.8)	17.5 (15.7,19.3)	16.5 (14.5,18.6)	16.5 (14.8,18.4)	16.6 (14.8,18.5)	16.0 (14.1,17.9)	16.1 (14.0,18.2)	15.6 (12.7,18.5)	15.0 (12.8,17.5)	14.3 (12.1,16.7)	-2.4 (-3.7,-1.1)
	Female	17.8 (14.6,21.7)	17.6 (14.8,21.1)	17.5 (14.8,20.6)	17.0 (14.7,19.6)	16.7 (14.5,19.0)	16.5 (14.6,18.5)	16.2 (14.5,17.8)	16.2 (14.7,17.7)	15.8 (14.4,17.3)	15.6 (14.2,17.2)	15.1 (13.6,16.8)	15.3 (13.3,17.4)	14.1 (11.9,16.3)	13.3 (10.8,16.0)	13.2 (10.6,15.9)	13.5 (11.3,16.0)	12.9 (10.8,15.1)	-2.0 (-3.7,-0.4)
	Both	19.3 (16.4,22.7)	19.0 (16.3,22.1)	18.8 (16.2,21.6)	18.2 (15.8,20.8)	18.2 (15.9,20.6)	17.7 (15.6,19.9)	17.3 (15.5,19.2)	17.0 (15.4,18.8)	16.6 (15.0,18.3)	16.1 (14.5,17.7)	15.8 (14.2,17.6)	15.9 (14.2,17.9)	15.0 (13.1,17.0)	14.7 (12.7,16.8)	14.4 (12.3,16.6)	14.2 (12.0,16.7)	13.6 (11.4,15.9)	-2.2 (-3.6,-0.8)
Middlesex County, CT	Male	19.5 (16.8,22.4)	19.1 (16.5,21.8)	18.8 (16.2,21.4)	19.7 (17.3,22.1)	18.5 (16.3,20.8)	19.1 (16.8,21.3)	18.6 (16.7,20.6)	17.4 (15.6,19.2)	16.0 (14.3,17.7)	15.6 (13.7,17.6)	15.5 (13.7,17.2)	14.7 (13.0,16.5)	15.2 (13.4,17.1)	14.8 (12.8,17.0)	15.0 (12.2,18.0)	14.2 (11.9,16.7)	13.5 (11.3,15.9)	-2.3 (-3.7,-0.8)
	Female	19.0 (15.7,23.0)	18.7 (15.8,22.1)	18.4 (15.6,21.3)	16.8 (14.4,19.3)	16.3 (14.2,18.5)	16.0 (14.2,17.8)	15.6 (14.0,17.2)	15.2 (13.8,16.7)	14.9 (13.5,16.2)	14.6 (13.2,16.1)	14.5 (12.9,16.1)	14.8 (12.8,16.9)	13.8 (11.7,16.2)	13.3 (10.8,16.2)	12.7 (10.1,15.6)	11.8 (9.7,14.2)	11.3 (9.2,13.6)	-3.3 (-5.0,-1.4)
	Both	19.3 (16.4,22.6)	18.9 (16.2,21.8)	18.6 (16.0,21.3)	18.2 (15.9,20.7)	17.4 (15.3,19.6)	17.5 (15.5,19.5)	17.1 (15.4,18.8)	16.3 (14.7,17.9)	15.4 (13.9,17.0)	15.1 (13.6,16.7)	15.0 (13.3,16.6)	14.8 (13.0,16.6)	14.5 (12.7,16.5)	14.0 (12.0,16.2)	13.8 (11.8,16.1)	13.0 (10.8,15.5)	12.4 (10.2,14.7)	-2.8 (-4.3,-1.1)
New Haven County, CT	Male	20.6 (18.6,22.7)	20.2 (18.4,22.3)	19.9 (18.1,21.8)	20.4 (18.8,22.3)	20.0 (18.5,21.7)	20.2 (18.6,21.9)	19.7 (18.3,21.3)	19.0 (17.6,20.4)	18.3 (17.1,19.6)	18.0 (16.7,19.4)	18.2 (17.1,19.4)	17.7 (16.5,18.9)	17.7 (16.4,19.0)	17.0 (15.5,18.5)	16.5 (14.5,18.5)	15.5 (13.7,17.2)	14.7 (12.9,16.4)	-2.1 (-3.1,-1.2)
	Female	19.1 (16.9,21.6)	18.8 (17.0,20.8)	18.6 (17.0,20.3)	18.1 (16.7,19.5)	18.2 (16.9,19.6)	17.4 (16.3,18.6)	17.5 (16.5,18.5)	17.1 (16.2,18.0)	17.3 (16.5,18.1)	16.4 (15.6,17.3)	16.0 (15.0,16.9)	15.5 (14.2,16.7)	15.0 (13.6,16.4)	13.9 (12.2,15.5)	13.2 (11.4,15.0)	12.8 (11.3,14.2)	12.2 (10.8,13.5)	-2.8 (-3.9,-1.8)
	Both	19.9 (17.8,22.0)	19.5 (17.7,21.4)	19.2 (17.6,21.0)	19.2 (17.7,20.9)	19.1 (17.7,20.6)	18.8 (17.5,20.2)	18.6 (17.4,19.9)	18.0 (16.9,19.2)	17.8 (16.8,18.9)	17.2 (16.2,18.2)	17.1 (16.1,18.1)	16.6 (15.5,17.6)	16.3 (15.1,17.5)	15.4 (14.0,16.7)	14.8 (13.3,16.2)	14.1 (12.4,15.7)	13.4 (11.8,14.9)	-2.5 (-3.5,-1.5)
New London County, CT	Male	21.7 (19.1,24.5)	21.3 (18.9,23.8)	20.8 (18.4,23.4)	19.5 (17.4,21.8)	18.7 (16.7,21.1)	19.3 (17.3,21.5)	19.2 (17.4,21.2)	17.9 (16.2,19.7)	17.5 (15.9,19.2)	16.7 (15.0,18.6)	16.2 (14.8,18.0)	15.9 (14.4,17.8)	16.6 (15.0,18.5)	16.3 (14.5,18.7)	16.3 (13.8,19.1)	15.4 (13.3,17.9)	14.7 (12.6,17.1)	-2.5 (-3.7,-1.2)
	Female	19.5 (16.3,22.9)	19.3 (16.5,22.3)	19.1 (16.6,21.6)	19.6 (17.4,21.9)	18.7 (16.8,20.9)	18.5 (16.9,20.3)	18.5 (17.0,20.0)	18.0 (16.6,19.4)	16.5 (15.3,17.8)	16.6 (15.4,17.9)	16.6 (15.2,18.1)	15.4 (13.6,17.3)	14.5 (12.5,16.6)	13.7 (11.3,16.3)	12.8 (10.4,15.4)	12.4 (10.7,14.7)	11.9 (10.2,14.0)	-3.1 (-4.5,-1.5)
	Both	20.6 (17.8,23.6)	20.2 (17.7,22.9)	19.9 (17.6,22.4)	19.5 (17.4,21.8)	18.7 (16.7,20.9)	18.9 (17.1,20.9)	18.8 (17.2,20.6)	17.9 (16.4,19.5)	17.0 (15.6,18.5)	16.6 (15.3,18.2)	16.4 (15.1,18.0)	15.6 (14.2,17.4)	15.5 (13.9,17.5)	15.0 (13.2,17.1)	14.5 (12.7,16.7)	13.9 (12.0,16.3)	13.2 (11.4,15.5)	-2.8 (-4.1,-1.4)
Tolland County, CT	Male	19.3 (16.7,22.2)	18.9 (16.4,21.8)	18.6 (16.1,21.5)	18.0 (15.8,20.5)	17.3 (15.2,19.6)	17.1 (15.1,19.4)	17.0 (15.2,19.0)	16.4 (14.7,18.3)	16.2 (14.6,18.1)	15.1 (13.2,17.2)	14.9 (13.2,16.7)	14.2 (12.5,16.0)	13.6 (11.9,15.3)	13.1 (11.1,15.1)	13.4 (10.5,16.1)	12.8 (10.6,15.2)	12.2 (10.1,14.5)	-2.9 (-4.4,-1.5)
	Female	15.2 (12.2,18.8)	15.2 (12.6,18.4)	15.2 (12.8,18.1)	16.4 (14.3,18.9)	16.1 (14.1,18.4)	16.6 (14.9,18.6)	16.1 (14.6,17.8)	15.7 (14.3,17.2)	14.2 (12.9,15.6)	14.1 (12.7,15.7)	13.7 (12.2,15.4)	13.2 (11.3,15.3)	11.8 (9.7,14.2)	11.6 (8.8,14.3)	11.4 (8.6,14.1)	11.6 (9.4,14.0)	11.1 (9.0,13.4)	-2.0 (-3.8,-0.2)
	Both	17.2 (14.5,20.5)	17.0 (14.5,20.0)	16.9 (14.5,19.7)	17.2 (15.1,19.6)	16.7 (14.6,19.0)	16.8 (14.9,18.9)	16.5 (14.9,18.4)	16.0 (14.5,17.7)	15.2 (13.7,16.8)	14.6 (13.0,16.2)	14.3 (12.8,16.0)	13.7 (12.1,15.5)	12.7 (11.0,14.7)	12.3 (10.4,14.5)	12.4 (10.3,14.5)	12.2 (10.0,14.6)	11.6 (9.5,13.9)	-2.4 (-4.1,-0.9)
Windham County, CT	Male	23.6 (20.8,26.3)	23.2 (20.6,25.8)	22.8 (20.2,25.4)	22.1 (19.8,24.4)	22.2 (20.0,24.5)	22.7 (20.5,25.2)	22.5 (20.4,24.9)	21.5 (19.5,23.7)	21.4 (19.4,23.6)	20.1 (17.9,22.7)	18.9 (17.0,21.1)	17.7 (15.8,19.9)	17.6 (15.6,19.8)	16.6 (14.4,19.3)	17.5 (14.4,21.2)	17.7 (15.2,20.8)	16.9 (14.5,19.9)	-2.1 (-3.3,-0.9)
	Female	21.4 (18.3,24.9)	21.6 (18.9,24.5)	21.8 (19.3,24.3)	22.6 (20.5,25.0)	21.9 (19.9,24.1)	21.9 (20.1,23.8)	21.7 (20.0,23.5)	20.9 (19.3,22.5)	19.6 (18.0,21.2)	19.2 (17.6,21.0)	19.0 (17.2,20.9)	18.0 (15.8,20.3)	17.2 (14.8,19.8)	16.3 (13.5,19.5)	15.8 (12.9,18.9)	15.1 (12.7,18.1)	14.4 (12.2,17.3)	-2.5 (-3.9,-1.0)
	Both	22.5 (19.7,25.4)	22.4 (19.8,25.0)	22.3 (19.9,24.8)	22.4 (20.2,24.7)	22.1 (20.0,24.3)	22.3 (20.3,24.4)	22.1 (20.2,24.2)	21.2 (19.5,23.0)	20.5 (18.7,22.4)	19.6 (17.8,21.6)	19.0 (17.2,20.9)	17.9 (16.0,19.9)	17.4 (15.4,19.6)	16.5 (14.3,19.0)	16.6 (14.4,19.3)	16.4 (13.9,19.4)	15.6 (13.3,18.6)	-2.3 (-3.5,-1.0)
District of Columbia, DC	Male	18.2 (16.5,20.3)	17.9 (16.3,19.8)	17.5 (16.0,19.3)	17.8 (16.4,19.5)	18.0 (16.6,19.7)	17.4 (16.1,19.0)	17.3 (16.2,18.7)	17.1 (16.2,18.3)	16.0 (15.2,17.0)	15.5 (14.6,16.6)	15.4 (14.6,16.3)	14.6 (13.8,15.6)	14.4 (13.5,15.5)	14.4 (13.3,15.6)	13.7 (12.4,15.2)	12.6 (11.4,14.1)	12.0 (10.8,13.4)	-2.6 (-3.5,-1.7)
	Female	11.7 (10.2,13.5)	12.0 (10.7,13.5)	12.3 (11.2,13.6)	12.6 (11.6,13.8)	13.8 (12.8,15.1)	13.7 (12.8,14.7)	13.3 (12.6,14.2)	13.0 (12.4,13.7)	12.7 (12.1,13.3)	12.4 (11.8,13.1)	12.4 (11.7,13.1)	12.5 (11.6,13.5)	12.2 (11.1,13.3)	12.1 (10.9,13.3)	11.5 (10.1,12.8)	11.0 (9.9,12.2)	10.5 (9.4,11.5)	-0.7 (-1.8,0.4)
	Both	14.9 (13.3,16.7)	14.9 (13.5,16.5)	14.8 (13.6,16.4)	15.1 (14.0,16.5)	15.9 (14.7,17.3)	15.5 (14.4,16.8)	15.3 (14.4,16.4)	15.0 (14.3,15.9)	14.3 (13.6,15.1)	13.9 (13.3,14.7)	13.9 (13.1,14.6)	13.6 (12.8,14.4)	13.3 (12.4,14.3)	13.2 (12.2,14.4)	12.6 (11.5,13.8)	11.8 (10.7,13.1)	11.2 (10.1,12.4)	-1.8 (-2.7,-0.8)
Kent County, DE	Male	27.3 (25.1,29.8)	26.5 (24.4,28.6)	26.5 (24.5,28.5)	25.9 (24.0,27.8)	25.7 (23.9,27.6)	25.3 (23.4,27.2)	23.4 (21.8,25.0)	25.0 (23.3,26.7)	23.4 (22.0,24.9)	22.4 (20.7,24.2)	21.9 (20.6,23.4)	22.4 (20.9,24.1)	19.8 (18.3,21.5)	20.2 (18.3,22.1)	19.5 (17.0,22.1)	19.9 (17.7,22.1)	18.9 (16.8,21.0)	-2.3 (-3.2,-1.4)
	Female	22.7 (20.3,25.4)	22.1 (20.2,24.2)	22.0 (20.4,23.7)	21.6 (20.1,23.1)	21.2 (19.7,22.7)	19.1 (17.9,20.3)	19.0 (18.0,20.0)	19.8 (18.9,20.8)	19.0 (18.2,20.0)	18.7 (17.7,19.9)	19.6 (18.3,20.8)	19.0 (17.3,20.7)	17.2 (15.3,19.1)	17.7 (15.5,20.0)	16.7 (14.4,19.1)	18.7 (16.8,20.6)	17.9 (16.1,19.7)	-1.5 (-2.4,-0.6)
	Both	25.0 (22.7,27.5)	24.2 (22.4,26.4)	24.2 (22.4,26.0)	23.7 (22.0,25.5)	23.4 (21.7,25.0)	22.1 (20.6,23.6)	21.2 (19.9,22.5)	22.4 (21.1,23.7)	21.2 (20.1,22.4)	20.5 (19.4,21.7)	20.7 (19.5,22.1)	20.7 (19.2,22.2)	18.5 (16.9,20.1)	18.9 (17.2,20.7)	18.1 (16.2,20.0)	19.3 (17.2,21.4)	18.4 (16.4,20.4)	-1.9 (-2.8,-1.0)
New Castle County, DE	Male	23.3 (21.6,25.1)	22.5 (21.0,24.2)	22.5 (21.0,24.2)	22.5 (20.9,24.2)	21.9 (20.2,23.7)	20.8 (19.2,22.5)	21.0 (19.5,22.5)	22.0 (20.5,23.5)	21.2 (19.9,22.6)	19.9 (18.5,21.4)	19.9 (18.6,21.1)	19.1 (17.9,20.4)	17.7 (16.4,19.0)	17.3 (15.8,18.7)	16.3 (14.3,18.2)	15.9 (14.2,17.6)	15.1 (13.4,16.7)	-2.7 (-3.6,-1.8)
	Female	19.6 (17.9,21.3)	19.1 (17.8,20.6)	19.1 (17.8,20.4)	18.9 (17.6,20.3)	17.9 (16.6,19.3)	17.1 (16.0,18.3)	16.3 (15.4,17.3)	16.9 (16.0,17.9)	16.3 (15.4,17.2)	16.0 (15.1,17.0)	15.8 (14.8,16.8)	15.9 (14.4,17.2)	14.3 (12.8,15.8)	13.7 (12.0,15.4)	13.1 (11.3,14.9)	13.8 (12.4,15.2)	13.2 (11.9,14.6)	-2.5 (-3.3,-1.6)
	Both	21.4 (19.8,23.2)	20.8 (19.4,22.4)	20.8 (19.4,22.3)	20.6 (19.2,22.2)	19.8 (18.4,21.4)	18.9 (17.6,20.3)	18.6 (17.4,19.9)	19.4 (18.2,20.6)	18.7 (17.6,19.8)	18.0 (16.9,19.0)	17.8 (16.7,18.9)	17.5 (16.2,18.7)	16.0 (14.7,17.3)	15.4 (14.1,16.8)	14.7 (13.2,16.1)	14.8 (13.3,16.4)	14.2 (12.6,15.6)	-2.6 (-3.5,-1.7)
Sussex County, DE	Male	29.0 (26.7,31.3)	28.3 (26.2,30.4)	28.5 (26.5,30.5)	28.6 (26.7,30.5)	27.7 (25.9,29.6)	26.3 (24.6,28.1)	25.8 (24.1,27.5)	26.1 (24.6,27.9)	25.6 (24.1,27.1)	24.7 (23.0,26.4)	25.1 (23.7,26.7)	24.5 (22.9,26.2)	23.2 (21.6,25.1)	22.0 (20.1,24.0)	20.9 (18.5,23.6)	20.3 (18.1,22.7)	19.4 (17.4,21.8)	-2.5 (-3.4,-1.6)
	Female	22.6 (20.1,25.1)	22.2 (20.2,24.1)	22.2 (20.6,23.8)	22.1 (20.6,23.6)	22.3 (20.9,23.8)	20.8 (19.6,22.0)	20.7 (19.6,21.7)	21.1 (20.2,22.2)	19.7 (18.8,20.7)	19.1 (18.1,20.3)	18.7 (17.6,20.1)	18.8 (17.1,20.6)	17.6 (15.8,19.7)	17.8 (15.6,20.2)	17.3 (14.8,19.8)	18.6 (16.7,20.7)	17.8 (16.1,19.8)	-1.5 (-2.4,-0.5)
	Both	25.8 (23.3,28.0)	25.2 (23.3,27.1)	25.3 (23.5,27.1)	25.3 (23.6,27.0)	25.0 (23.4,26.6)	23.5 (22.1,25.0)	23.2 (21.8,24.5)	23.6 (22.3,24.9)	22.6 (21.5,23.8)	21.8 (20.7,23.1)	21.8 (20.6,23.2)	21.6 (20.2,23.2)	20.4 (18.8,22.2)	19.9 (18.1,21.8)	19.1 (17.2,21.1)	19.4 (17.4,21.7)	18.6 (16.8,20.8)	-2.0 (-2.8,-1.1)
Alachua County, FL	Male	18.2 (15.6,21.0)	17.9 (15.3,20.7)	17.5 (15.1,20.4)	17.6 (15.2,20.5)	17.3 (14.9,20.0)	17.8 (15.3,20.6)	17.5 (15.4,19.9)	17.2 (15.1,19.5)	16.5 (14.6,18.5)	16.4 (14.5,18.5)	16.0 (14.3,17.8)	15.9 (14.2,17.8)	15.3 (13.6,17.2)	15.2 (13.2,17.3)	14.2 (11.4,17.1)	12.9 (10.7,15.6)	12.2 (10.0,14.8)	-2.5 (-4.1,-1.0)
	Female	14.4 (11.3,17.9)	14.3 (11.5,17.4)	14.2 (11.6,17.1)	13.8 (11.5,16.6)	13.0 (10.9,15.5)	13.1 (11.2,15.3)	12.9 (11.2,14.9)	11.8 (10.2,13.5)	12.2 (10.7,13.7)	14.3 (12.9,15.8)	13.6 (12.2,15.3)	13.2 (11.4,15.3)	12.3 (10.2,14.6)	12.0 (9.3,14.8)	10.0 (7.2,12.7)	10.7 (8.5,13.3)	10.2 (8.1,12.7)	-2.2 (-4.2,-0.1)
	Both	16.3 (13.5,19.4)	16.1 (13.5,19.0)	15.8 (13.4,18.7)	15.7 (13.2,18.5)	15.1 (12.9,17.7)	15.4 (13.3,17.9)	15.2 (13.3,17.3)	14.4 (12.7,16.4)	14.3 (12.6,16.1)	15.3 (13.7,16.9)	14.8 (13.3,16.5)	14.6 (12.9,16.5)	13.8 (12.0,15.8)	13.6 (11.6,15.8)	12.1 (10.0,14.4)	11.8 (9.6,14.4)	11.2 (9.1,13.7)	-2.4 (-4.1,-0.6)
Baker County, FL	Male	27.9 (24.4,32.0)	27.6 (24.0,31.7)	27.3 (23.6,31.3)	26.9 (23.3,30.9)	26.3 (22.5,30.4)	27.6 (23.7,31.9)	27.4 (24.0,31.0)	27.4 (24.1,30.9)	27.7 (24.9,30.9)	27.8 (24.9,31.1)	27.7 (25.1,30.6)	27.4 (24.7,30.4)	27.3 (24.6,30.3)	26.2 (23.1,29.7)	25.0 (20.8,29.6)	23.4 (19.8,27.7)	22.3 (18.7,26.5)	-1.4 (-2.7,-0.1)
	Female	24.3 (19.4,30.0)	24.2 (19.7,29.5)	24.1 (19.9,28.9)	24.0 (20.0,28.7)	23.1 (19.2,27.6)	23.7 (20.2,27.9)	23.1 (19.9,26.8)	23.3 (20.6,26.3)	22.0 (19.7,24.5)	23.7 (21.7,26.1)	23.5 (21.2,26.2)	23.2 (20.3,26.5)	20.7 (17.3,24.4)	20.7 (16.4,25.2)	19.0 (14.6,23.7)	22.1 (18.3,26.7)	21.2 (17.5,25.6)	-0.8 (-2.6,1.0)
	Both	26.1 (21.8,30.9)	25.9 (21.9,30.3)	25.7 (21.8,30.1)	25.4 (21.6,29.8)	24.7 (20.8,29.0)	25.6 (21.9,29.7)	25.2 (21.9,28.8)	25.3 (22.4,28.5)	24.8 (22.2,27.6)	25.7 (23.5,28.3)	25.6 (23.3,28.2)	25.3 (22.7,28.2)	23.9 (21.0,27.2)	23.4 (20.1,27.2)	21.9 (18.4,25.9)	22.7 (19.0,27.1)	21.7 (18.1,26.0)	-1.1 (-2.6,0.4)
Bay County, FL	Male	26.2 (22.5,30.1)	25.9 (22.3,29.6)	25.4 (21.9,29.1)	24.8 (21.3,28.4)	25.2 (21.8,29.0)	25.5 (21.9,29.3)	25.4 (22.4,28.6)	25.5 (22.7,28.7)	23.6 (21.1,26.4)	25.2 (22.4,28.1)	24.0 (21.5,26.6)	23.2 (20.5,25.9)	23.3 (20.7,26.1)	24.7 (21.7,27.9)	22.1 (17.9,26.3)	22.0 (18.7,25.9)	21.0 (17.8,24.7)	-1.4 (-2.7,0.1)
	Female	23.6 (19.0,28.6)	23.4 (19.2,27.9)	23.0 (19.0,27.0)	22.0 (18.4,25.8)	20.8 (17.4,24.5)	20.6 (17.7,23.9)	20.3 (17.8,23.4)	20.4 (18.0,23.3)	21.4 (19.2,24.0)	23.7 (21.7,25.9)	23.4 (21.3,25.8)	23.2 (20.7,26.3)	21.6 (18.8,25.2)	20.5 (16.9,24.8)	18.2 (14.6,22.5)	17.0 (13.9,20.9)	16.2 (13.3,19.7)	-2.4 (-4.0,-0.4)
	Both	24.9 (20.8,29.3)	24.6 (20.7,28.6)	24.2 (20.5,28.1)	23.4 (19.9,27.1)	23.0 (19.6,26.7)	23.0 (19.9,26.4)	22.8 (20.1,26.0)	22.9 (20.4,25.9)	22.5 (20.2,25.2)	24.4 (22.1,26.9)	23.7 (21.4,26.0)	23.2 (20.9,25.8)	22.4 (19.9,25.3)	22.6 (19.8,25.9)	20.1 (17.1,23.7)	19.4 (16.2,23.3)	18.5 (15.5,22.1)	-1.8 (-3.3,-0.1)
Bradford County, FL	Male	26.9 (23.3,31.0)	26.6 (23.0,30.5)	26.3 (22.9,30.4)	25.8 (22.2,29.8)	25.4 (21.8,29.6)	27.0 (23.3,31.4)	27.2 (24.1,30.9)	27.3 (24.3,31.0)	26.5 (23.8,29.9)	26.6 (23.8,29.8)	25.2 (22.9,28.1)	25.1 (22.6,28.0)	26.4 (23.8,29.4)	26.9 (24.0,30.2)	25.3 (21.3,29.9)	22.9 (19.4,26.7)	22.0 (18.6,25.9)	-1.3 (-2.6,0.1)
	Female	23.2 (18.0,29.0)	23.2 (18.6,28.6)	23.0 (18.7,27.9)	22.4 (18.4,27.0)	22.1 (18.3,26.7)	21.4 (18.0,25.6)	21.7 (18.6,25.6)	21.6 (19.0,24.9)	20.6 (18.5,23.4)	21.3 (19.4,23.5)	22.1 (20.0,24.4)	21.2 (18.4,24.5)	21.5 (18.0,25.0)	22.0 (17.6,26.2)	20.1 (15.6,24.6)	19.9 (16.3,24.0)	19.1 (15.8,22.9)	-1.2 (-3.1,0.6)
	Both	25.1 (20.8,30.1)	24.8 (20.7,29.5)	24.6 (20.8,29.0)	24.1 (20.3,28.4)	23.7 (20.0,28.2)	24.2 (20.7,28.3)	24.4 (21.4,28.2)	24.4 (21.6,27.9)	23.5 (21.1,26.5)	23.9 (21.8,26.5)	23.6 (21.5,26.1)	23.1 (20.7,25.8)	23.9 (21.1,26.8)	24.4 (21.2,27.7)	22.7 (19.4,26.3)	21.4 (17.8,25.3)	20.5 (17.2,24.4)	-1.3 (-2.9,0.3)
Brevard County, FL	Male	24.6 (21.8,28.0)	24.3 (21.7,27.6)	23.9 (21.3,27.2)	23.5 (20.8,26.7)	23.3 (20.6,26.6)	22.6 (20.0,25.9)	23.8 (21.2,26.9)	23.3 (20.8,26.2)	23.7 (21.4,26.3)	22.0 (19.5,24.5)	21.6 (19.4,23.9)	21.5 (19.3,23.8)	20.2 (18.1,22.5)	19.4 (16.8,22.1)	19.5 (15.8,23.1)	18.2 (15.4,21.3)	17.3 (14.6,20.4)	-2.2 (-3.7,-0.9)
	Female	24.2 (20.4,28.8)	24.1 (20.8,27.9)	23.8 (20.9,27.3)	22.4 (19.7,25.8)	23.2 (20.5,26.4)	23.7 (21.0,26.8)	22.1 (19.7,24.9)	20.7 (18.6,23.1)	22.0 (20.1,24.0)	20.8 (19.0,22.7)	19.6 (17.7,21.7)	18.8 (16.1,21.6)	19.6 (16.4,22.7)	19.6 (15.6,23.2)	18.5 (14.5,22.3)	17.9 (14.9,21.4)	17.1 (14.2,20.4)	-2.2 (-3.9,-0.7)
	Both	24.4 (21.3,28.3)	24.2 (21.3,27.7)	23.9 (21.2,27.2)	22.9 (20.3,26.3)	23.2 (20.6,26.5)	23.2 (20.6,26.4)	23.0 (20.5,25.9)	22.0 (19.7,24.6)	22.9 (20.7,25.1)	21.4 (19.5,23.5)	20.6 (18.7,22.6)	20.1 (18.0,22.3)	19.9 (17.5,22.5)	19.5 (16.7,22.3)	19.0 (16.2,22.0)	18.1 (15.1,21.4)	17.2 (14.4,20.4)	-2.2 (-3.7,-0.8)
Broward County, FL	Male	20.8 (18.6,23.2)	20.2 (18.2,22.5)	19.6 (17.7,21.8)	19.8 (17.8,22.1)	18.9 (16.9,21.0)	17.9 (15.9,20.1)	18.8 (16.9,20.8)	19.2 (17.3,21.0)	17.7 (16.1,19.3)	18.0 (16.1,19.8)	17.2 (15.7,18.8)	16.1 (14.6,17.8)	15.4 (13.8,17.2)	15.8 (13.8,17.8)	13.0 (10.3,15.8)	13.5 (11.3,16.0)	12.7 (10.6,15.1)	-3.1 (-4.3,-1.8)
	Female	18.0 (15.5,20.7)	17.7 (15.7,20.0)	17.4 (15.6,19.4)	17.5 (15.7,19.4)	17.4 (15.6,19.3)	16.6 (14.9,18.3)	15.3 (13.9,16.8)	15.5 (14.3,16.8)	14.8 (13.6,15.9)	14.4 (13.3,15.6)	13.5 (12.3,14.8)	13.7 (12.1,15.7)	12.6 (10.9,14.8)	12.0 (9.9,14.6)	10.8 (8.7,13.3)	10.2 (8.4,12.4)	9.7 (7.9,11.7)	-3.9 (-5.3,-2.4)
	Both	19.4 (17.1,21.9)	19.0 (17.0,21.2)	18.5 (16.6,20.5)	18.6 (16.8,20.7)	18.1 (16.3,20.2)	17.2 (15.5,19.2)	17.0 (15.4,18.8)	17.3 (15.8,18.8)	16.2 (14.9,17.6)	16.2 (14.8,17.5)	15.3 (14.0,16.7)	14.9 (13.5,16.6)	14.0 (12.4,15.9)	13.9 (12.2,15.9)	11.9 (10.1,14.0)	11.8 (9.8,14.2)	11.1 (9.2,13.3)	-3.5 (-4.8,-2.1)
Calhoun County, FL	Male	28.2 (24.4,32.4)	27.9 (24.1,31.9)	27.6 (23.8,31.7)	26.9 (23.1,30.9)	26.8 (22.8,31.2)	27.4 (23.5,31.8)	27.9 (24.4,31.6)	28.6 (25.2,32.1)	27.7 (24.6,31.0)	30.2 (27.0,33.4)	28.8 (26.1,31.7)	27.7 (24.9,30.7)	26.1 (23.2,29.4)	27.3 (24.0,31.0)	23.3 (18.9,28.2)	24.9 (21.0,29.6)	23.7 (19.9,28.3)	-1.1 (-2.4,0.3)
	Female	23.4 (18.2,29.6)	23.4 (18.6,28.7)	23.5 (19.0,28.4)	23.8 (19.5,28.6)	23.1 (18.9,27.8)	23.3 (19.6,27.4)	23.3 (19.8,27.3)	24.4 (21.2,28.0)	25.4 (22.5,28.5)	25.0 (22.7,27.5)	24.7 (22.4,27.3)	24.7 (21.6,27.9)	23.4 (19.9,27.2)	23.6 (19.2,28.3)	21.0 (16.5,25.8)	20.6 (16.6,25.3)	19.8 (16.0,24.2)	-1.1 (-2.9,0.9)
	Both	25.8 (21.3,30.7)	25.6 (21.4,30.2)	25.5 (21.5,30.0)	25.3 (21.3,29.7)	24.9 (20.8,29.4)	25.3 (21.6,29.7)	25.6 (22.2,29.3)	26.5 (23.2,30.0)	26.5 (23.6,29.7)	27.6 (25.1,30.2)	26.7 (24.2,29.4)	26.2 (23.6,29.1)	24.7 (21.8,28.1)	25.4 (22.1,29.3)	22.2 (18.7,26.4)	22.7 (18.8,27.4)	21.7 (17.9,26.3)	-1.1 (-2.6,0.6)
Charlotte County, FL	Male	26.7 (23.2,30.6)	26.3 (22.9,30.1)	25.8 (22.4,29.8)	25.6 (22.2,29.5)	24.7 (21.3,28.9)	24.2 (20.9,28.3)	24.7 (21.7,28.2)	24.9 (22.1,28.4)	24.3 (21.8,27.4)	25.2 (22.5,28.5)	25.4 (22.9,28.3)	25.1 (22.4,28.2)	24.6 (21.8,27.5)	25.0 (21.8,28.3)	23.1 (19.0,27.7)	22.1 (18.4,25.9)	20.9 (17.3,24.7)	-1.5 (-2.9,-0.1)
	Female	22.9 (18.3,28.4)	22.7 (18.7,27.7)	22.4 (18.7,26.8)	21.2 (17.7,25.4)	21.0 (17.6,25.2)	21.5 (18.4,25.4)	20.9 (18.0,24.5)	21.8 (19.1,25.1)	21.9 (19.5,24.8)	22.7 (20.6,25.1)	22.3 (20.0,24.8)	22.2 (19.4,25.4)	21.4 (18.4,24.9)	20.8 (16.9,25.1)	18.7 (14.9,23.0)	16.7 (13.2,20.5)	15.8 (12.7,19.4)	-2.3 (-4.2,-0.4)
	Both	24.8 (20.8,29.6)	24.5 (20.8,28.7)	24.1 (20.6,28.1)	23.4 (19.9,27.4)	22.8 (19.4,27.0)	22.8 (19.7,26.9)	22.7 (19.9,26.3)	23.3 (20.6,26.7)	23.1 (20.6,26.1)	23.9 (21.6,26.6)	23.8 (21.6,26.5)	23.6 (21.0,26.5)	23.0 (20.1,26.0)	22.8 (19.7,26.2)	20.8 (17.6,24.3)	19.3 (15.7,23.2)	18.3 (14.9,22.0)	-1.9 (-3.5,-0.2)
Citrus County, FL	Male	27.6 (24.0,31.7)	27.3 (23.8,31.3)	26.9 (23.4,30.7)	26.4 (22.9,30.3)	25.8 (22.3,29.7)	25.8 (22.3,29.6)	25.7 (22.7,29.0)	24.5 (21.5,27.7)	24.7 (22.0,27.7)	25.8 (22.9,28.9)	25.2 (22.6,27.7)	25.0 (22.4,27.6)	24.7 (22.0,27.4)	24.5 (21.3,27.5)	22.3 (17.9,26.3)	23.3 (19.9,26.9)	22.2 (18.8,25.9)	-1.4 (-2.7,0.0)
	Female	25.1 (20.4,30.5)	25.1 (20.8,30.0)	24.9 (20.9,29.6)	25.3 (21.4,29.8)	23.6 (19.9,27.7)	24.8 (21.2,28.7)	24.4 (21.1,28.0)	24.7 (21.9,28.0)	24.9 (22.4,27.5)	28.7 (26.6,31.1)	29.1 (26.9,31.6)	28.2 (25.2,31.4)	26.9 (23.5,30.5)	26.6 (22.2,31.1)	21.9 (17.7,26.4)	19.9 (16.5,23.7)	19.1 (15.8,22.8)	-1.7 (-3.4,0.0)
	Both	26.3 (22.2,31.0)	26.2 (22.3,30.6)	25.9 (22.3,30.1)	25.9 (22.2,30.1)	24.7 (21.1,28.6)	25.3 (21.9,29.1)	25.0 (21.9,28.5)	24.6 (21.7,27.8)	24.8 (22.2,27.6)	27.3 (25.0,29.7)	27.2 (24.9,29.5)	26.6 (24.1,29.1)	25.8 (23.1,28.7)	25.6 (22.4,28.9)	22.1 (18.8,25.5)	21.6 (18.1,25.3)	20.6 (17.3,24.4)	-1.5 (-3.0,0.0)
Clay County, FL	Male	23.3 (20.2,26.9)	23.0 (20.0,26.3)	22.4 (19.6,25.7)	21.7 (18.8,24.9)	21.1 (18.2,24.2)	21.7 (18.7,24.9)	21.7 (19.1,24.6)	21.4 (18.8,24.2)	21.3 (19.0,23.9)	22.0 (19.5,24.7)	21.1 (18.9,23.6)	20.5 (18.1,23.1)	20.2 (17.9,22.8)	20.1 (17.6,23.0)	18.5 (14.7,22.5)	16.7 (13.9,20.1)	15.8 (13.0,19.1)	-2.4 (-4.0,-1.0)
	Female	20.6 (16.5,25.2)	20.6 (16.9,24.8)	20.6 (17.2,24.4)	20.3 (17.0,23.9)	20.0 (17.0,23.4)	20.2 (17.4,23.2)	20.3 (17.7,23.2)	19.9 (17.4,22.5)	19.0 (16.9,21.2)	18.4 (16.5,20.5)	17.9 (15.9,20.1)	17.3 (14.7,20.1)	17.0 (14.1,20.0)	17.2 (13.4,20.7)	16.1 (12.3,19.8)	14.6 (11.7,18.2)	13.9 (11.2,17.2)	-2.5 (-4.5,-0.6)
	Both	21.9 (18.3,26.0)	21.8 (18.5,25.5)	21.5 (18.4,25.0)	21.0 (17.9,24.5)	20.6 (17.6,23.8)	20.9 (18.1,24.0)	21.0 (18.4,23.9)	20.6 (18.2,23.3)	20.1 (17.9,22.6)	20.2 (18.2,22.4)	19.5 (17.4,21.7)	18.8 (16.6,21.3)	18.6 (16.2,21.1)	18.6 (16.0,21.4)	17.2 (14.6,20.4)	15.6 (12.8,19.1)	14.8 (12.1,18.1)	-2.4 (-4.2,-0.8)
Collier County, FL	Male	21.4 (18.5,24.7)	21.0 (18.2,24.3)	20.5 (17.7,23.7)	21.4 (18.5,24.6)	20.8 (17.8,24.1)	20.1 (17.3,23.3)	19.9 (17.5,22.6)	20.1 (17.7,22.8)	19.7 (17.4,22.0)	19.4 (17.2,21.7)	18.6 (16.6,20.6)	18.4 (16.4,20.5)	17.4 (15.5,19.4)	16.1 (13.9,18.4)	13.8 (10.9,17.0)	14.3 (11.9,17.1)	13.6 (11.3,16.2)	-2.9 (-4.3,-1.3)
	Female	18.1 (14.5,22.1)	17.9 (14.7,21.6)	17.7 (14.7,21.0)	17.0 (14.2,20.3)	16.2 (13.5,19.3)	16.5 (14.0,19.5)	15.3 (13.1,17.8)	15.6 (13.5,17.8)	15.4 (13.5,17.3)	16.0 (14.5,17.6)	15.9 (14.3,17.6)	16.1 (13.9,18.4)	15.4 (13.0,18.0)	15.3 (12.3,18.6)	13.7 (10.8,17.0)	12.2 (9.7,14.9)	11.6 (9.3,14.1)	-2.8 (-4.6,-0.8)
	Both	19.7 (16.5,23.3)	19.4 (16.5,22.8)	19.1 (16.3,22.3)	19.1 (16.3,22.4)	18.4 (15.7,21.7)	18.3 (15.6,21.3)	17.5 (15.2,20.1)	17.8 (15.6,20.2)	17.5 (15.5,19.7)	17.7 (15.9,19.5)	17.2 (15.5,19.0)	17.3 (15.4,19.2)	16.4 (14.3,18.5)	15.7 (13.5,18.2)	13.8 (11.5,16.2)	13.2 (10.8,16.0)	12.6 (10.3,15.2)	-2.8 (-4.4,-1.1)
Columbia County, FL	Male	26.9 (23.2,30.9)	26.5 (23.2,30.3)	26.1 (22.9,29.9)	26.0 (22.7,29.7)	25.2 (21.7,29.1)	26.3 (22.8,30.3)	26.6 (23.4,30.2)	26.8 (23.6,30.2)	27.1 (24.0,30.1)	27.3 (24.4,30.3)	26.5 (23.7,29.2)	26.4 (23.5,29.2)	25.6 (22.7,28.5)	26.4 (23.0,29.7)	24.8 (20.3,29.3)	23.0 (19.2,27.0)	21.9 (18.2,25.8)	-1.3 (-2.7,0.1)
	Female	21.0 (16.4,26.7)	21.1 (16.9,26.2)	21.0 (17.1,25.6)	21.3 (17.7,25.5)	21.1 (17.7,25.1)	20.5 (17.1,24.1)	20.6 (17.4,24.0)	20.1 (17.2,23.1)	20.1 (17.6,22.8)	23.1 (20.8,25.5)	23.1 (20.6,25.6)	22.1 (19.0,25.3)	21.6 (18.0,25.4)	22.4 (17.8,26.9)	20.5 (15.7,25.3)	20.9 (16.9,25.2)	19.9 (16.1,24.0)	-0.3 (-2.3,1.5)
	Both	23.9 (19.9,28.6)	23.7 (19.9,28.1)	23.5 (20.0,27.6)	23.6 (20.1,27.5)	23.1 (19.7,27.0)	23.3 (20.0,27.1)	23.5 (20.4,27.0)	23.4 (20.4,26.6)	23.5 (20.8,26.4)	25.2 (22.8,27.6)	24.8 (22.2,27.2)	24.2 (21.4,27.1)	23.6 (20.6,26.7)	24.4 (21.0,27.9)	22.6 (19.1,26.4)	21.9 (18.0,26.1)	20.9 (17.1,24.9)	-0.8 (-2.4,0.7)
DeSoto County, FL	Male	28.1 (24.2,32.5)	27.6 (23.8,31.7)	26.9 (23.2,31.1)	26.6 (22.9,30.9)	25.7 (21.9,29.9)	24.9 (21.2,29.0)	24.6 (21.5,28.1)	24.8 (21.6,28.0)	24.6 (21.7,27.5)	24.4 (21.5,27.1)	24.6 (22.0,27.0)	25.0 (22.5,27.6)	23.0 (20.3,25.7)	23.4 (20.3,26.5)	22.9 (18.4,27.1)	22.3 (18.8,26.2)	21.2 (17.8,25.1)	-1.8 (-3.2,-0.3)
	Female	23.7 (18.5,30.2)	23.5 (18.8,29.0)	23.2 (18.8,28.2)	23.1 (19.1,28.0)	23.2 (19.2,27.7)	23.2 (19.6,27.1)	22.1 (19.1,25.5)	22.7 (20.0,25.5)	21.8 (19.4,24.4)	22.4 (20.4,24.4)	22.6 (20.4,25.0)	22.0 (19.0,25.1)	20.2 (16.6,23.7)	20.7 (16.1,25.1)	19.0 (14.6,23.4)	19.2 (15.6,23.2)	18.3 (14.9,22.1)	-1.6 (-3.5,0.3)
	Both	25.9 (21.4,31.2)	25.5 (21.3,30.4)	25.0 (21.1,29.5)	24.8 (20.9,29.5)	24.4 (20.5,28.7)	24.0 (20.5,28.0)	23.4 (20.3,26.8)	23.7 (20.9,26.7)	23.2 (20.5,25.9)	23.3 (21.1,25.5)	23.6 (21.4,25.8)	23.5 (21.0,26.1)	21.6 (18.8,24.5)	22.0 (18.8,25.4)	20.9 (17.7,24.4)	20.7 (17.2,24.7)	19.7 (16.3,23.4)	-1.7 (-3.4,0.0)
Dixie County, FL	Male	29.2 (24.9,33.2)	28.9 (24.7,32.7)	28.6 (24.5,32.4)	28.3 (24.2,32.1)	27.5 (23.4,31.6)	28.2 (24.1,32.3)	29.2 (25.8,32.7)	29.1 (25.8,32.5)	29.2 (26.2,32.4)	29.2 (26.2,32.5)	30.3 (27.7,33.2)	30.5 (27.8,33.4)	30.9 (28.2,34.0)	29.5 (26.5,33.1)	28.6 (24.1,33.7)	24.6 (21.1,28.9)	23.5 (20.0,27.8)	-1.4 (-2.6,0.1)
	Female	24.1 (18.4,30.0)	24.0 (18.9,29.3)	23.9 (19.2,28.7)	24.7 (20.1,29.1)	24.4 (20.0,28.8)	26.2 (22.2,30.4)	25.6 (22.0,29.6)	28.5 (24.9,32.2)	27.9 (25.0,30.9)	29.9 (27.6,32.4)	30.2 (27.8,32.9)	30.4 (27.2,34.2)	28.9 (25.2,33.1)	27.0 (22.5,32.2)	26.2 (21.6,31.4)	22.1 (18.3,26.8)	21.1 (17.5,25.5)	-0.8 (-2.6,1.2)
	Both	26.6 (21.7,31.5)	26.4 (21.9,30.9)	26.2 (21.8,30.3)	26.5 (22.1,30.6)	25.9 (21.7,30.1)	27.2 (23.3,31.2)	27.3 (23.9,30.9)	28.8 (25.4,32.3)	28.5 (25.7,31.7)	29.6 (27.2,32.2)	30.3 (27.8,32.9)	30.4 (27.9,33.4)	29.9 (27.0,33.1)	28.2 (24.8,31.9)	27.4 (24.0,31.4)	23.3 (19.7,27.8)	22.3 (18.8,26.6)	-1.1 (-2.6,0.6)
Duval County, FL	Male	23.8 (21.2,26.5)	23.4 (20.9,25.9)	22.8 (20.4,25.4)	22.2 (19.9,24.7)	22.2 (20.1,24.7)	21.9 (19.6,24.4)	21.5 (19.4,24.1)	21.0 (18.8,23.6)	21.6 (19.4,24.0)	21.6 (19.3,23.9)	21.4 (19.4,23.5)	20.9 (18.9,22.9)	21.2 (19.1,23.3)	20.3 (18.0,22.7)	19.0 (15.9,22.4)	16.9 (14.3,19.9)	16.1 (13.4,18.9)	-2.4 (-3.8,-1.2)
	Female	19.4 (16.5,23.0)	19.3 (16.8,22.2)	19.1 (16.9,21.5)	18.5 (16.4,20.7)	17.7 (15.8,19.8)	17.6 (15.9,19.6)	16.9 (15.3,18.7)	16.8 (15.3,18.6)	16.1 (14.6,17.7)	17.5 (16.0,18.9)	17.0 (15.4,18.7)	16.6 (14.4,18.8)	16.3 (13.8,19.0)	16.6 (13.4,19.9)	15.1 (11.9,18.4)	15.0 (12.4,17.9)	14.3 (11.8,17.0)	-1.9 (-3.6,-0.5)
	Both	21.6 (18.9,24.7)	21.3 (19.0,23.9)	20.9 (18.6,23.2)	20.3 (18.1,22.7)	19.9 (17.9,22.2)	19.7 (17.8,21.9)	19.2 (17.3,21.3)	18.9 (17.1,21.0)	18.8 (17.0,20.8)	19.5 (17.9,21.2)	19.2 (17.5,20.8)	18.7 (16.8,20.6)	18.7 (16.5,21.0)	18.5 (15.9,21.0)	17.0 (14.6,19.7)	15.9 (13.3,18.9)	15.1 (12.6,18.0)	-2.2 (-3.7,-0.9)
Escambia County, FL	Male	24.6 (21.4,27.9)	24.2 (21.0,27.4)	23.7 (20.5,26.7)	22.4 (19.4,25.5)	22.2 (19.1,25.5)	22.1 (19.1,25.1)	22.5 (19.9,25.5)	22.9 (20.3,25.9)	23.6 (21.0,26.3)	25.1 (22.4,27.9)	23.8 (21.5,26.3)	23.6 (21.3,26.1)	23.4 (21.1,25.9)	23.2 (20.5,26.0)	20.1 (16.4,23.8)	19.1 (16.1,22.5)	18.1 (15.2,21.5)	-1.9 (-3.3,-0.5)
	Female	20.5 (16.8,24.5)	20.3 (17.2,24.0)	20.1 (17.0,23.3)	19.8 (16.7,22.9)	20.1 (17.2,23.1)	20.2 (17.4,23.2)	20.3 (17.7,23.1)	19.9 (17.6,22.5)	20.0 (18.0,22.3)	20.3 (18.4,22.3)	19.6 (17.7,21.7)	18.7 (16.3,21.3)	19.4 (16.7,22.5)	19.5 (16.0,23.2)	18.0 (14.5,21.8)	16.7 (13.8,20.1)	16.0 (13.2,19.3)	-1.5 (-3.2,0.2)
	Both	22.5 (19.3,26.0)	22.2 (19.1,25.6)	21.9 (18.8,25.0)	21.1 (18.1,24.2)	21.2 (18.1,24.3)	21.1 (18.3,24.1)	21.4 (18.8,24.2)	21.4 (18.9,24.1)	21.8 (19.5,24.2)	22.7 (20.6,24.9)	21.7 (19.6,23.9)	21.1 (19.0,23.6)	21.4 (19.0,23.9)	21.3 (18.6,24.1)	19.0 (16.3,22.1)	17.9 (14.9,21.3)	17.0 (14.2,20.4)	-1.7 (-3.2,-0.2)
Flagler County, FL	Male	23.6 (20.2,27.6)	23.2 (19.9,27.1)	22.7 (19.4,26.4)	22.3 (19.0,26.0)	22.3 (18.9,26.2)	23.2 (19.8,27.0)	24.1 (21.1,27.3)	23.0 (20.4,25.7)	22.8 (20.5,25.2)	23.2 (20.7,25.8)	22.8 (20.5,25.0)	22.1 (19.8,24.3)	22.5 (20.2,24.9)	23.5 (20.7,26.2)	21.5 (17.6,25.3)	20.0 (16.9,23.3)	19.0 (16.0,22.1)	-1.4 (-2.8,0.0)
	Female	24.8 (19.8,30.8)	24.6 (20.1,29.9)	24.2 (20.0,29.2)	22.8 (18.8,27.6)	22.8 (19.0,27.2)	24.0 (20.7,27.7)	23.5 (20.6,26.6)	22.1 (19.9,24.4)	21.0 (19.1,22.9)	21.7 (19.9,23.5)	20.9 (18.8,22.9)	20.1 (17.3,23.0)	20.2 (17.0,23.4)	20.3 (16.4,24.1)	18.8 (14.9,22.7)	17.7 (14.5,21.1)	16.8 (13.9,20.0)	-2.4 (-4.3,-0.6)
	Both	24.2 (20.2,29.0)	23.9 (20.1,28.6)	23.5 (19.7,27.9)	22.5 (18.9,26.8)	22.6 (19.0,26.7)	23.6 (20.3,27.3)	23.8 (20.8,26.9)	22.5 (20.2,25.0)	21.9 (19.8,24.0)	22.4 (20.4,24.4)	21.8 (19.8,23.8)	21.1 (18.7,23.3)	21.3 (18.7,23.9)	21.8 (18.9,24.8)	20.1 (17.3,23.2)	18.8 (15.7,22.2)	17.9 (14.9,21.0)	-1.9 (-3.6,-0.3)
Franklin County, FL	Male	28.1 (24.3,32.4)	27.8 (24.1,31.9)	27.3 (23.6,31.2)	26.7 (22.9,30.6)	27.1 (22.9,31.1)	27.7 (23.7,31.8)	27.0 (23.7,30.4)	26.8 (23.6,30.0)	27.1 (24.0,30.1)	26.5 (23.0,30.0)	24.7 (21.5,27.9)	24.2 (21.1,27.5)	24.9 (21.7,28.5)	24.9 (21.4,28.6)	24.2 (19.5,28.8)	21.8 (18.3,25.8)	20.7 (17.4,24.5)	-1.9 (-3.3,-0.5)
	Female	22.5 (17.4,28.4)	22.5 (17.8,27.8)	22.5 (18.1,27.5)	23.0 (18.8,27.8)	22.5 (18.3,26.9)	22.7 (18.9,26.5)	24.2 (20.7,27.7)	23.9 (20.7,27.2)	23.1 (20.2,25.9)	24.7 (21.8,27.7)	24.3 (21.2,27.6)	23.2 (19.6,27.2)	22.7 (18.7,27.1)	23.6 (19.0,28.9)	20.2 (15.8,25.2)	20.4 (16.7,25.1)	19.6 (16.0,24.0)	-0.9 (-2.8,1.2)
	Both	25.3 (20.9,30.2)	25.1 (21.0,29.8)	24.8 (20.8,29.3)	24.8 (20.8,29.1)	24.7 (20.6,28.9)	25.2 (21.3,29.1)	25.6 (22.2,29.0)	25.3 (22.2,28.6)	25.0 (22.0,28.0)	25.6 (22.4,28.6)	24.5 (21.5,27.6)	23.7 (20.6,27.2)	23.8 (20.4,27.6)	24.3 (20.8,28.3)	22.1 (18.7,26.2)	21.1 (17.5,25.4)	20.1 (16.7,24.2)	-1.4 (-3.1,0.3)
Gadsden County, FL	Male	24.6 (21.2,28.6)	24.2 (20.8,28.0)	23.8 (20.5,27.3)	22.8 (19.5,26.3)	22.7 (19.3,26.5)	23.7 (20.3,27.6)	24.5 (21.5,27.9)	25.4 (22.4,28.8)	25.5 (22.6,28.6)	25.9 (23.0,28.9)	24.1 (21.6,26.7)	23.8 (21.3,26.4)	22.8 (20.4,25.4)	21.4 (18.7,24.4)	19.1 (15.2,23.1)	19.1 (15.9,22.5)	18.1 (15.1,21.5)	-1.9 (-3.4,-0.4)
	Female	18.2 (14.0,23.2)	18.1 (14.4,22.7)	17.9 (14.6,22.1)	18.8 (15.5,22.8)	18.2 (15.0,21.9)	17.5 (14.6,20.9)	17.1 (14.4,20.3)	17.3 (14.7,20.3)	16.8 (14.5,19.4)	14.5 (12.8,16.3)	14.2 (12.6,16.1)	14.4 (12.1,16.9)	14.0 (11.4,16.7)	13.7 (10.4,17.1)	13.6 (10.3,17.1)	14.3 (11.5,17.5)	13.6 (11.0,16.6)	-1.8 (-3.9,0.2)
	Both	21.3 (17.6,25.9)	21.1 (17.7,25.4)	20.8 (17.5,24.6)	20.8 (17.5,24.5)	20.4 (17.2,24.2)	20.5 (17.4,24.2)	20.7 (17.9,24.1)	21.3 (18.5,24.5)	21.0 (18.5,23.9)	20.1 (18.0,22.4)	19.1 (17.1,21.2)	19.0 (16.9,21.3)	18.3 (16.0,20.7)	17.5 (14.9,20.2)	16.3 (13.5,19.4)	16.6 (13.7,20.0)	15.8 (13.0,19.0)	-1.9 (-3.6,-0.2)
Gilchrist County, FL	Male	27.0 (23.1,31.0)	26.7 (22.9,30.5)	26.3 (22.5,30.1)	26.0 (22.2,29.8)	25.0 (21.4,29.0)	25.8 (22.0,29.8)	25.9 (22.7,29.3)	25.6 (22.6,28.9)	26.1 (23.3,29.1)	26.4 (23.5,29.4)	25.5 (23.0,28.2)	25.6 (23.0,28.5)	24.2 (21.6,27.1)	22.7 (19.8,25.9)	22.2 (18.2,26.5)	21.5 (18.1,25.5)	20.5 (17.1,24.3)	-1.7 (-3.3,-0.3)
	Female	21.5 (16.4,27.4)	21.5 (16.8,26.6)	21.3 (17.0,25.9)	21.4 (17.2,25.7)	21.0 (17.1,25.2)	21.2 (17.8,25.1)	21.5 (18.3,25.1)	21.7 (18.9,24.9)	21.7 (19.2,24.4)	23.8 (21.7,26.3)	23.9 (21.4,26.6)	23.5 (20.0,26.9)	23.5 (19.6,27.5)	22.4 (17.5,27.2)	20.8 (15.9,25.7)	21.0 (17.2,25.6)	20.1 (16.4,24.4)	-0.4 (-2.5,1.5)
	Both	24.2 (19.8,29.0)	24.0 (19.9,28.4)	23.7 (19.7,27.8)	23.7 (19.8,27.8)	22.9 (19.3,27.1)	23.5 (19.9,27.4)	23.7 (20.5,27.2)	23.6 (20.8,26.8)	23.9 (21.3,26.7)	25.1 (22.7,27.6)	24.6 (22.3,27.3)	24.5 (21.8,27.5)	23.8 (20.8,27.1)	22.5 (19.1,26.2)	21.5 (18.1,25.4)	21.3 (17.6,25.5)	20.3 (16.8,24.3)	-1.1 (-2.8,0.5)
Glades County, FL	Male	26.2 (22.4,30.0)	25.8 (22.1,29.5)	25.2 (21.6,28.9)	24.9 (21.3,28.7)	24.3 (20.7,28.2)	24.2 (20.5,28.0)	24.9 (21.7,28.2)	25.5 (22.3,28.8)	25.4 (22.4,28.5)	24.4 (21.1,27.9)	24.5 (21.3,27.6)	24.0 (20.9,27.4)	23.1 (19.9,26.6)	23.4 (19.7,27.5)	23.6 (18.8,28.8)	23.9 (19.7,28.2)	22.8 (18.7,27.1)	-0.9 (-2.3,0.6)
	Female	21.3 (16.5,26.6)	21.2 (16.8,26.1)	21.1 (17.0,25.5)	21.3 (17.2,25.7)	21.7 (17.7,26.1)	21.9 (18.2,26.0)	21.5 (18.1,25.3)	21.2 (18.1,24.7)	20.6 (17.9,23.6)	21.1 (18.5,24.0)	21.5 (18.7,24.5)	21.6 (18.4,25.3)	21.3 (18.0,25.5)	21.1 (17.1,25.9)	18.9 (15.1,23.6)	16.6 (12.9,20.7)	15.5 (12.0,19.4)	-2.0 (-4.1,0.3)
	Both	23.7 (19.5,28.2)	23.4 (19.5,27.7)	23.1 (19.2,27.1)	23.1 (19.2,27.1)	23.0 (19.2,27.0)	23.0 (19.5,26.8)	23.2 (20.0,26.8)	23.3 (20.3,26.7)	23.0 (20.1,26.0)	22.7 (19.9,25.6)	23.0 (20.0,26.1)	22.8 (19.9,26.0)	22.2 (19.2,25.6)	22.2 (18.9,26.0)	21.2 (17.7,25.3)	20.1 (16.3,24.4)	19.1 (15.4,23.1)	-1.3 (-3.1,0.4)
Gulf County, FL	Male	27.7 (23.7,31.8)	27.3 (23.4,31.3)	26.9 (22.9,30.8)	26.1 (22.2,29.9)	25.4 (21.5,29.4)	26.1 (22.1,30.2)	26.3 (22.9,29.7)	26.7 (23.3,30.0)	26.3 (23.2,29.3)	27.5 (24.3,30.6)	26.4 (23.7,29.1)	26.1 (23.4,28.8)	26.2 (23.5,28.9)	25.3 (22.3,28.5)	23.0 (18.7,27.3)	22.9 (19.4,26.7)	21.8 (18.3,25.7)	-1.5 (-2.9,-0.1)
	Female	21.8 (16.6,27.9)	21.9 (17.1,27.2)	21.8 (17.5,26.7)	22.0 (17.7,26.7)	21.2 (17.1,25.6)	21.7 (18.1,25.6)	22.8 (19.3,26.6)	22.7 (19.5,26.0)	22.6 (19.9,25.4)	24.7 (22.3,27.0)	23.7 (21.1,26.2)	22.4 (19.2,25.8)	22.6 (18.9,26.5)	23.5 (18.9,28.3)	20.0 (15.4,24.8)	20.1 (16.4,24.2)	19.2 (15.5,23.1)	-0.8 (-2.8,1.3)
	Both	24.7 (20.1,29.7)	24.6 (20.3,29.1)	24.3 (20.2,28.7)	24.0 (19.9,28.3)	23.3 (19.2,27.5)	23.9 (20.1,27.8)	24.5 (21.1,28.1)	24.7 (21.4,27.9)	24.4 (21.6,27.3)	26.0 (23.5,28.5)	25.0 (22.6,27.5)	24.2 (21.5,27.0)	24.4 (21.5,27.5)	24.4 (21.1,27.9)	21.5 (18.2,25.1)	21.5 (17.9,25.5)	20.5 (16.9,24.3)	-1.2 (-2.8,0.6)
Hamilton County, FL	Male	28.3 (24.4,32.4)	28.0 (24.2,32.1)	27.7 (23.8,31.7)	26.4 (22.7,30.5)	26.5 (22.7,30.7)	26.8 (22.9,31.1)	26.7 (23.4,30.3)	26.7 (23.3,30.1)	28.2 (25.0,31.7)	29.0 (25.7,32.3)	28.2 (25.2,31.1)	26.8 (23.7,30.0)	27.2 (24.2,30.6)	26.7 (23.0,30.4)	24.9 (19.9,29.9)	25.1 (21.2,29.6)	24.0 (20.0,28.6)	-1.0 (-2.5,0.4)
	Female	20.0 (15.5,25.4)	20.1 (15.9,25.0)	20.0 (16.1,24.4)	21.9 (18.0,26.4)	21.9 (18.1,26.2)	21.6 (18.1,25.4)	21.6 (18.5,25.2)	21.5 (18.6,24.7)	20.8 (18.1,23.6)	22.3 (20.1,24.6)	22.2 (19.8,24.9)	21.6 (18.5,25.0)	21.7 (18.1,25.8)	20.6 (16.1,25.3)	19.8 (15.1,24.9)	18.9 (15.2,23.3)	18.2 (14.6,22.5)	-0.6 (-2.7,1.5)
	Both	24.1 (19.9,28.8)	24.0 (20.1,28.3)	23.8 (20.0,28.0)	24.1 (20.3,28.4)	24.2 (20.4,28.4)	24.1 (20.5,28.2)	24.1 (21.0,27.7)	24.1 (21.0,27.4)	24.4 (21.5,27.6)	25.5 (23.0,28.1)	25.2 (22.5,27.9)	24.2 (21.4,27.1)	24.4 (21.5,27.9)	23.6 (20.3,27.5)	22.3 (18.7,26.4)	22.0 (18.1,26.4)	21.0 (17.3,25.5)	-0.8 (-2.5,0.8)
Hardee County, FL	Male	27.2 (23.3,31.4)	26.8 (23.1,31.0)	26.4 (22.8,30.5)	26.2 (22.5,30.5)	25.7 (22.0,29.9)	25.1 (21.3,29.3)	24.5 (21.3,28.1)	24.0 (20.8,27.4)	24.2 (21.2,27.5)	22.0 (19.0,24.9)	21.8 (19.2,24.5)	21.2 (18.7,23.9)	19.5 (16.9,22.2)	18.5 (15.4,21.7)	18.7 (14.4,23.1)	22.2 (18.5,26.0)	21.2 (17.7,25.0)	-1.6 (-3.0,-0.1)
	Female	20.5 (16.0,25.9)	20.4 (16.3,25.3)	20.2 (16.3,24.8)	20.0 (16.2,24.4)	21.3 (17.5,25.6)	22.0 (18.5,26.0)	22.3 (19.0,26.2)	22.3 (19.2,25.8)	22.2 (19.4,25.1)	20.1 (18.1,22.2)	18.4 (16.3,20.6)	18.2 (15.6,21.2)	17.1 (14.0,20.6)	15.9 (12.1,20.1)	15.6 (11.5,19.9)	16.2 (12.9,19.8)	15.5 (12.4,19.0)	-1.8 (-3.8,0.3)
	Both	23.8 (19.7,28.5)	23.6 (19.7,28.0)	23.2 (19.5,27.4)	23.1 (19.4,27.4)	23.4 (19.7,27.7)	23.5 (20.0,27.6)	23.4 (20.2,27.1)	23.1 (20.1,26.6)	23.2 (20.3,26.3)	21.0 (18.7,23.3)	20.1 (17.9,22.3)	19.7 (17.3,22.2)	18.3 (15.7,21.1)	17.2 (14.2,20.5)	17.1 (14.0,20.6)	19.2 (15.7,22.8)	18.3 (15.0,21.9)	-1.7 (-3.3,0.1)
Hendry County, FL	Male	26.2 (22.2,30.1)	25.8 (21.9,29.5)	25.2 (21.4,28.9)	25.5 (21.6,29.3)	25.2 (21.3,29.1)	24.4 (20.6,28.2)	24.8 (21.5,28.0)	25.2 (22.0,28.4)	24.8 (21.9,28.0)	23.0 (20.1,26.0)	22.8 (20.3,25.5)	22.5 (19.9,25.3)	21.2 (18.6,24.2)	20.4 (17.5,23.7)	19.7 (15.2,24.0)	20.7 (17.1,24.7)	19.5 (15.9,23.3)	-1.8 (-3.3,-0.4)
	Female	21.1 (16.1,26.5)	20.9 (16.4,25.7)	20.6 (16.4,25.0)	20.7 (16.6,24.8)	20.4 (16.5,24.4)	21.0 (17.6,24.7)	19.9 (16.8,23.3)	19.9 (17.0,23.0)	19.2 (16.7,21.9)	18.3 (16.6,20.2)	18.0 (16.1,20.1)	17.7 (15.3,20.6)	17.1 (14.5,20.1)	16.2 (12.9,19.9)	15.1 (11.8,18.9)	13.0 (10.1,16.5)	12.4 (9.6,15.7)	-3.3 (-5.3,-1.1)
	Both	23.6 (19.3,28.1)	23.3 (19.2,27.5)	22.9 (18.9,26.8)	23.0 (19.1,27.0)	22.8 (18.8,26.7)	22.7 (19.2,26.3)	22.3 (19.2,25.6)	22.5 (19.5,25.7)	21.9 (19.2,24.9)	20.6 (18.4,22.9)	20.4 (18.3,22.6)	20.1 (17.8,22.7)	19.1 (16.7,21.9)	18.3 (15.5,21.3)	17.4 (14.4,20.8)	16.8 (13.5,20.5)	15.9 (12.7,19.4)	-2.5 (-4.2,-0.7)
Hernando County, FL	Male	26.7 (23.2,30.7)	26.4 (22.8,30.3)	25.9 (22.5,29.9)	24.9 (21.5,28.8)	24.5 (21.1,28.7)	24.2 (20.8,28.3)	23.5 (20.7,26.9)	22.9 (20.1,26.1)	23.4 (20.6,26.2)	25.7 (22.8,28.7)	24.1 (21.6,26.8)	24.1 (21.5,26.8)	23.5 (20.7,26.3)	23.6 (20.4,26.7)	21.3 (17.1,25.4)	22.7 (19.1,26.5)	21.6 (18.0,25.2)	-1.3 (-2.8,0.0)
	Female	24.7 (19.7,30.1)	24.6 (20.2,29.6)	24.4 (20.5,28.9)	21.8 (18.2,26.0)	21.9 (18.5,26.2)	23.2 (19.9,27.1)	24.2 (21.1,27.9)	25.0 (22.0,28.3)	25.7 (23.0,28.6)	26.3 (23.9,29.0)	25.1 (22.6,28.0)	24.7 (21.7,28.2)	23.5 (20.0,27.2)	23.4 (19.0,27.8)	21.7 (17.4,26.5)	19.7 (16.0,23.7)	18.8 (15.3,22.4)	-1.7 (-3.5,0.1)
	Both	25.7 (21.6,30.3)	25.5 (21.7,29.8)	25.1 (21.4,29.3)	23.3 (19.8,27.4)	23.2 (19.9,27.4)	23.7 (20.5,27.7)	23.9 (20.9,27.4)	24.0 (21.1,27.2)	24.6 (21.9,27.4)	26.0 (23.6,28.5)	24.6 (22.2,27.3)	24.4 (21.8,27.4)	23.5 (20.7,26.6)	23.5 (20.4,26.9)	21.5 (18.2,25.1)	21.1 (17.5,25.0)	20.1 (16.6,23.8)	-1.5 (-3.1,0.1)
Highlands County, FL	Male	25.1 (21.7,29.0)	24.7 (21.3,28.4)	24.2 (20.8,27.8)	24.5 (21.1,28.3)	24.2 (20.6,28.0)	24.0 (20.4,27.8)	24.8 (21.6,28.1)	24.9 (21.7,28.1)	24.5 (21.6,27.4)	22.5 (19.8,25.2)	22.9 (20.5,25.3)	22.4 (20.0,25.0)	22.4 (19.8,24.9)	22.8 (19.8,25.6)	22.8 (18.7,26.8)	22.3 (18.7,25.7)	21.2 (17.7,24.6)	-1.0 (-2.5,0.3)
	Female	21.0 (16.9,26.3)	21.0 (17.2,25.7)	20.8 (17.2,25.2)	20.0 (16.6,24.1)	20.3 (16.8,24.1)	20.3 (17.1,23.7)	20.5 (17.4,23.8)	20.5 (17.7,23.6)	21.5 (18.9,24.3)	21.2 (19.2,23.2)	21.3 (19.1,23.5)	21.0 (18.0,23.8)	20.0 (16.6,23.4)	19.6 (15.3,23.6)	18.0 (13.7,22.1)	16.8 (13.5,20.2)	16.0 (12.8,19.1)	-1.7 (-3.8,0.2)
	Both	23.0 (19.4,27.6)	22.8 (19.2,27.0)	22.5 (19.0,26.4)	22.2 (18.8,26.1)	22.2 (18.7,26.0)	22.1 (18.8,25.6)	22.6 (19.5,25.8)	22.7 (19.7,25.8)	23.0 (20.3,25.8)	21.8 (19.7,24.0)	22.1 (19.9,24.3)	21.7 (19.2,24.1)	21.2 (18.4,23.9)	21.1 (18.0,24.2)	20.3 (17.2,23.4)	19.5 (16.1,22.9)	18.6 (15.2,21.8)	-1.3 (-3.1,0.2)
Hillsborough County, FL	Male	24.0 (21.4,26.7)	23.8 (21.2,26.4)	23.4 (20.9,25.9)	23.0 (20.6,25.5)	22.6 (20.1,25.0)	22.7 (20.2,25.2)	20.9 (18.7,23.0)	20.2 (18.1,22.3)	20.0 (18.0,21.9)	20.1 (17.8,22.1)	19.8 (18.0,21.8)	19.8 (17.8,21.9)	18.1 (16.2,20.3)	18.1 (15.9,20.6)	16.7 (13.6,19.9)	17.3 (14.8,20.3)	16.5 (14.0,19.4)	-2.4 (-3.5,-1.1)
	Female	18.5 (15.7,21.5)	18.1 (15.7,20.8)	17.8 (15.5,20.1)	16.3 (14.2,18.5)	17.3 (15.3,19.4)	17.6 (15.6,19.5)	18.5 (16.6,20.3)	18.4 (16.6,20.0)	18.2 (16.6,19.7)	17.4 (16.0,19.0)	16.2 (14.7,17.9)	15.3 (13.4,17.4)	15.2 (13.2,17.7)	14.6 (12.1,17.5)	13.6 (11.0,16.6)	12.6 (10.4,15.2)	12.0 (9.9,14.5)	-2.7 (-4.2,-1.1)
	Both	21.2 (18.6,24.0)	20.9 (18.5,23.4)	20.5 (18.2,22.9)	19.6 (17.3,21.9)	19.9 (17.6,22.1)	20.1 (18.0,22.2)	19.7 (17.7,21.6)	19.3 (17.3,21.0)	19.1 (17.3,20.8)	18.7 (17.0,20.4)	18.0 (16.4,19.8)	17.5 (15.7,19.4)	16.6 (14.8,18.8)	16.3 (14.3,18.8)	15.1 (12.9,17.7)	14.9 (12.6,17.8)	14.2 (11.9,17.0)	-2.5 (-3.8,-1.1)
Holmes County, FL	Male	27.8 (23.9,32.2)	27.4 (23.7,31.7)	26.9 (23.3,31.1)	26.5 (22.8,30.6)	26.2 (22.3,30.5)	27.4 (23.4,32.0)	27.8 (24.4,31.8)	29.9 (26.4,33.8)	29.4 (26.1,32.8)	29.8 (26.5,33.2)	29.0 (26.1,31.7)	29.0 (26.1,31.7)	27.4 (24.5,30.3)	27.6 (24.3,30.8)	23.8 (19.0,28.4)	23.3 (19.3,27.1)	22.1 (18.3,26.0)	-1.4 (-2.9,-0.1)
	Female	24.0 (18.7,30.5)	23.9 (19.0,29.7)	23.8 (19.3,29.1)	24.3 (19.9,29.2)	23.6 (19.4,28.5)	23.5 (19.7,27.9)	23.1 (19.7,27.1)	21.6 (18.8,24.8)	23.9 (21.2,26.7)	24.7 (22.5,26.9)	25.6 (23.1,28.1)	24.7 (21.2,27.9)	24.5 (20.5,28.1)	23.9 (18.9,28.3)	22.0 (16.9,26.5)	22.1 (17.8,26.4)	21.2 (17.2,25.3)	-0.8 (-2.8,1.2)
	Both	25.9 (21.3,31.2)	25.7 (21.4,30.6)	25.3 (21.3,29.9)	25.4 (21.4,29.9)	24.9 (20.8,29.5)	25.4 (21.5,29.9)	25.4 (21.9,29.5)	25.7 (22.4,29.3)	26.6 (23.6,29.8)	27.2 (24.7,29.7)	27.2 (24.7,29.7)	26.8 (24.0,29.5)	25.9 (22.7,28.9)	25.7 (22.1,29.1)	22.9 (19.0,26.5)	22.7 (18.6,26.7)	21.6 (17.7,25.6)	-1.1 (-2.8,0.5)
Indian River County, FL	Male	25.0 (21.5,28.8)	24.6 (21.2,28.2)	24.0 (20.5,27.5)	23.5 (20.1,27.0)	22.9 (19.3,26.5)	22.1 (18.6,25.6)	23.6 (20.4,26.7)	23.8 (20.6,26.8)	24.2 (21.2,27.2)	23.1 (20.2,26.2)	23.0 (20.3,25.7)	22.3 (19.8,25.1)	21.1 (18.6,23.8)	20.3 (17.6,23.2)	18.2 (14.4,22.2)	18.0 (14.9,21.4)	17.1 (14.1,20.5)	-2.4 (-3.9,-0.9)
	Female	23.6 (18.7,28.8)	23.4 (19.1,28.0)	23.1 (19.1,27.3)	22.3 (18.5,26.5)	22.6 (18.9,26.5)	21.5 (18.2,25.0)	20.5 (17.4,23.7)	20.1 (17.4,22.8)	20.2 (17.7,22.7)	20.3 (18.1,22.6)	20.0 (17.8,22.5)	19.0 (16.3,21.9)	18.8 (15.8,22.1)	18.5 (14.7,22.6)	16.8 (12.8,20.9)	17.2 (13.9,20.9)	16.4 (13.2,20.0)	-2.3 (-4.2,-0.4)
	Both	24.3 (20.2,28.6)	24.0 (20.2,28.0)	23.5 (20.0,27.4)	22.9 (19.4,26.7)	22.7 (19.1,26.5)	21.8 (18.4,25.1)	22.0 (18.9,25.1)	21.9 (18.9,24.9)	22.1 (19.4,24.9)	21.7 (19.3,24.2)	21.5 (19.1,24.0)	20.6 (18.1,23.2)	19.9 (17.3,22.7)	19.4 (16.5,22.5)	17.5 (14.5,20.7)	17.6 (14.4,21.2)	16.7 (13.7,20.2)	-2.3 (-4.1,-0.7)
Jackson County, FL	Male	25.5 (21.6,29.3)	25.1 (21.4,28.8)	24.7 (21.1,28.4)	24.2 (20.6,28.0)	23.9 (20.2,27.8)	24.6 (20.8,28.5)	24.9 (21.5,28.3)	25.9 (22.5,29.4)	25.0 (21.9,28.1)	26.5 (23.6,29.5)	24.9 (22.5,27.8)	24.7 (22.2,27.5)	22.6 (20.1,25.4)	22.7 (20.0,25.9)	19.9 (15.9,24.2)	21.6 (18.4,25.3)	20.5 (17.4,24.2)	-1.4 (-2.7,0.1)
	Female	20.1 (15.3,25.6)	20.0 (15.7,24.9)	19.8 (15.6,24.2)	19.9 (16.0,24.1)	19.2 (15.5,23.1)	19.1 (15.9,22.6)	17.8 (14.9,21.0)	18.1 (15.4,21.1)	19.5 (17.0,22.3)	19.4 (17.4,21.7)	18.8 (16.7,21.1)	19.0 (16.3,21.9)	18.4 (15.5,21.7)	17.5 (13.7,21.5)	16.9 (13.2,20.9)	17.6 (14.5,21.4)	16.8 (13.9,20.4)	-1.1 (-3.0,0.9)
	Both	22.7 (18.6,27.4)	22.5 (18.4,26.7)	22.2 (18.4,26.2)	22.0 (18.3,26.0)	21.5 (17.9,25.4)	21.8 (18.4,25.5)	21.3 (18.1,24.6)	21.9 (18.9,25.1)	22.2 (19.4,25.2)	22.9 (20.6,25.3)	21.8 (19.6,24.2)	21.8 (19.4,24.4)	20.5 (18.0,23.3)	20.1 (17.3,23.2)	18.4 (15.5,21.7)	19.6 (16.4,23.3)	18.6 (15.6,22.3)	-1.3 (-2.8,0.5)
Jefferson County, FL	Male	23.7 (20.0,27.8)	23.3 (19.7,27.3)	22.8 (19.4,26.7)	21.8 (18.5,25.7)	21.8 (18.6,25.6)	22.2 (18.8,26.2)	22.6 (19.6,25.8)	22.2 (19.4,25.5)	23.0 (20.3,25.8)	22.9 (20.2,26.0)	22.1 (19.6,24.7)	21.8 (19.2,24.6)	22.8 (20.2,25.6)	23.1 (20.3,26.3)	21.7 (17.8,26.0)	19.8 (16.5,23.5)	18.8 (15.6,22.5)	-1.4 (-3.0,0.1)
	Female	16.2 (12.1,21.1)	16.2 (12.4,20.5)	16.1 (12.7,20.1)	16.6 (13.2,20.7)	16.3 (13.2,20.2)	16.2 (13.4,19.4)	16.7 (14.1,19.8)	16.7 (14.3,19.4)	15.7 (13.7,18.0)	16.4 (14.5,18.5)	17.4 (15.3,19.7)	17.6 (15.0,20.4)	18.1 (15.1,21.3)	17.5 (13.8,21.5)	15.8 (12.2,20.0)	15.1 (12.1,18.7)	14.4 (11.5,17.9)	-0.7 (-2.9,1.6)
	Both	19.9 (16.1,24.3)	19.6 (16.1,23.8)	19.4 (16.0,23.4)	19.2 (15.8,23.2)	19.0 (15.9,22.8)	19.1 (16.2,22.7)	19.6 (16.9,22.8)	19.4 (16.9,22.3)	19.3 (17.0,21.8)	19.6 (17.4,21.9)	19.7 (17.5,22.1)	19.7 (17.3,22.2)	20.4 (17.8,23.3)	20.2 (17.3,23.5)	18.7 (15.8,22.0)	17.4 (14.3,21.1)	16.6 (13.5,20.1)	-1.1 (-2.9,0.7)
Lafayette County, FL	Male	27.9 (23.8,32.2)	27.5 (23.7,31.7)	27.2 (23.3,31.4)	26.7 (22.9,31.0)	25.7 (21.8,30.1)	25.8 (21.8,30.1)	25.8 (22.5,29.5)	25.6 (22.4,29.3)	26.1 (22.9,29.3)	26.7 (23.2,30.4)	26.2 (22.8,29.9)	26.4 (23.0,30.1)	24.7 (21.5,28.4)	24.4 (20.8,28.5)	22.4 (17.6,27.3)	20.4 (16.9,24.4)	19.5 (16.0,23.4)	-2.2 (-3.8,-0.7)
	Female	21.1 (16.2,27.1)	21.1 (16.4,26.4)	20.9 (16.6,25.9)	21.4 (17.5,26.3)	21.2 (17.2,25.9)	21.9 (18.3,26.2)	23.0 (19.4,27.1)	24.4 (20.7,28.3)	24.1 (20.9,27.7)	26.3 (22.9,29.9)	26.9 (23.4,30.7)	26.8 (22.7,31.2)	24.9 (20.7,29.7)	24.1 (19.0,29.5)	21.5 (16.6,26.9)	19.3 (15.2,24.0)	18.4 (14.4,22.8)	-0.9 (-3.1,1.2)
	Both	24.4 (20.0,29.4)	24.2 (20.0,29.0)	24.0 (20.1,28.5)	24.0 (20.3,28.5)	23.4 (19.6,28.0)	23.8 (20.1,28.1)	24.4 (21.0,28.4)	25.0 (21.6,28.7)	25.1 (21.9,28.5)	26.5 (23.1,30.1)	26.6 (23.3,30.3)	26.6 (23.1,30.5)	24.8 (21.3,28.9)	24.2 (20.5,28.6)	22.0 (18.2,26.1)	19.9 (16.0,24.1)	18.9 (15.2,23.1)	-1.6 (-3.4,0.1)
Lake County, FL	Male	25.9 (22.2,29.6)	25.5 (22.0,29.3)	25.1 (21.7,28.8)	25.2 (21.7,28.9)	25.1 (21.7,28.9)	24.7 (21.2,28.4)	25.0 (21.8,28.1)	24.8 (21.8,27.9)	25.2 (22.6,28.2)	23.3 (20.7,26.2)	22.6 (20.3,25.2)	21.9 (19.7,24.4)	20.6 (18.3,23.2)	19.4 (16.8,22.5)	19.2 (15.7,23.4)	19.6 (16.6,23.2)	18.7 (15.7,22.2)	-2.0 (-3.4,-0.6)
	Female	24.8 (19.7,30.0)	24.7 (20.2,29.3)	24.4 (20.3,28.4)	23.5 (19.7,27.5)	23.3 (19.9,27.2)	22.9 (19.8,26.3)	21.9 (19.1,24.9)	20.9 (18.5,23.6)	19.3 (17.4,21.5)	18.7 (17.0,20.6)	18.3 (16.4,20.4)	17.2 (14.7,20.2)	16.8 (14.0,20.2)	17.3 (13.9,21.4)	16.1 (12.6,20.3)	16.1 (13.2,19.8)	15.4 (12.6,18.8)	-3.0 (-4.7,-1.1)
	Both	25.3 (21.1,29.7)	25.1 (21.2,28.9)	24.7 (21.1,28.7)	24.3 (20.6,28.2)	24.2 (20.9,28.0)	23.8 (20.6,27.3)	23.4 (20.4,26.5)	22.8 (20.2,25.7)	22.2 (19.9,24.8)	21.0 (19.0,23.2)	20.4 (18.4,22.5)	19.5 (17.4,21.8)	18.7 (16.5,21.4)	18.4 (15.8,21.4)	17.7 (15.0,20.9)	17.9 (14.9,21.4)	17.0 (14.1,20.5)	-2.5 (-4.0,-0.8)
Lee County, FL	Male	25.2 (22.1,28.8)	24.8 (21.9,28.2)	24.2 (21.3,27.6)	24.1 (21.3,27.5)	23.4 (20.6,26.8)	23.3 (20.5,26.7)	23.3 (20.8,26.5)	23.4 (21.0,26.5)	23.9 (21.7,26.7)	21.8 (19.5,24.7)	20.3 (18.3,22.8)	19.0 (17.0,21.5)	19.1 (17.0,21.6)	18.3 (15.9,21.1)	17.8 (14.4,21.4)	18.3 (15.3,21.7)	17.3 (14.4,20.7)	-2.3 (-3.7,-1.0)
	Female	21.6 (17.9,25.9)	21.3 (18.0,25.2)	20.8 (17.9,24.4)	20.0 (17.3,23.4)	19.9 (17.2,23.2)	20.2 (17.7,23.3)	20.1 (17.8,23.0)	20.4 (18.3,22.9)	19.1 (17.3,21.4)	19.1 (17.4,21.1)	18.9 (17.2,21.0)	18.0 (15.7,20.6)	18.2 (15.5,21.1)	18.5 (15.2,21.9)	16.5 (13.2,20.0)	13.3 (10.7,16.4)	12.6 (10.2,15.7)	-3.4 (-5.1,-1.5)
	Both	23.4 (20.2,27.3)	23.0 (19.9,26.6)	22.5 (19.7,25.9)	22.0 (19.2,25.4)	21.6 (18.9,24.9)	21.7 (19.1,24.9)	21.7 (19.3,24.7)	21.9 (19.7,24.7)	21.5 (19.5,24.0)	20.4 (18.6,22.7)	19.6 (17.8,21.8)	18.5 (16.6,20.9)	18.6 (16.4,21.3)	18.4 (15.9,21.3)	17.1 (14.6,20.0)	15.7 (13.0,19.0)	14.9 (12.3,18.2)	-2.8 (-4.3,-1.3)
Leon County, FL	Male	17.6 (15.2,20.7)	17.3 (14.9,20.1)	16.9 (14.5,19.7)	16.2 (13.9,18.9)	16.3 (14.0,19.0)	16.3 (14.0,19.1)	16.1 (14.0,18.6)	16.3 (14.3,18.6)	16.6 (14.6,18.8)	16.3 (14.3,18.5)	15.5 (13.8,17.5)	14.9 (13.2,16.9)	14.9 (13.3,16.8)	14.0 (12.1,16.2)	12.6 (10.0,15.5)	11.8 (9.6,14.1)	11.1 (9.0,13.4)	-2.9 (-4.6,-1.4)
	Female	13.9 (11.0,17.5)	13.6 (11.1,16.9)	13.3 (11.0,16.2)	13.3 (11.1,16.0)	12.8 (10.6,15.4)	11.6 (9.8,13.9)	12.4 (10.6,14.5)	12.2 (10.6,14.2)	11.6 (10.2,13.2)	11.2 (10.0,12.6)	11.2 (9.9,12.7)	10.3 (8.6,12.1)	10.2 (8.2,12.2)	9.7 (7.2,12.3)	9.1 (6.7,11.7)	9.5 (7.4,11.8)	9.0 (7.1,11.2)	-2.8 (-4.8,-0.8)
	Both	15.8 (13.1,19.1)	15.4 (13.0,18.5)	15.1 (12.8,17.8)	14.7 (12.5,17.4)	14.5 (12.4,17.1)	13.9 (11.9,16.4)	14.2 (12.3,16.5)	14.3 (12.4,16.4)	14.0 (12.4,15.9)	13.7 (12.2,15.4)	13.3 (11.9,14.9)	12.6 (11.1,14.3)	12.5 (10.8,14.4)	11.8 (10.0,13.8)	10.8 (9.0,13.0)	10.6 (8.5,13.0)	10.0 (8.0,12.3)	-2.8 (-4.7,-1.1)
Levy County, FL	Male	27.3 (23.6,31.4)	26.9 (23.4,30.9)	26.4 (23.0,30.4)	26.2 (22.8,30.3)	25.3 (21.8,29.3)	26.0 (22.5,30.0)	25.7 (22.9,29.2)	25.0 (22.3,28.1)	25.1 (22.6,27.7)	25.5 (23.0,28.2)	24.0 (21.7,26.3)	23.4 (20.9,25.9)	22.4 (19.9,25.2)	22.6 (19.6,25.7)	21.3 (17.2,25.4)	21.3 (17.9,25.0)	20.3 (17.0,24.0)	-1.8 (-3.3,-0.5)
	Female	21.7 (17.0,27.3)	21.7 (17.5,26.7)	21.6 (17.7,26.1)	22.3 (18.5,26.7)	21.1 (17.6,25.3)	23.0 (19.7,26.9)	22.2 (19.3,25.4)	22.4 (19.9,25.0)	22.4 (20.3,24.5)	24.7 (22.6,26.7)	24.5 (22.2,26.9)	24.2 (21.1,27.4)	23.8 (20.3,27.3)	23.8 (19.4,27.9)	21.4 (17.1,25.8)	19.3 (15.9,23.4)	18.5 (15.2,22.4)	-1.0 (-3.0,0.9)
	Both	24.5 (20.4,29.2)	24.3 (20.5,28.7)	23.9 (20.3,28.2)	24.2 (20.5,28.5)	23.1 (19.7,27.2)	24.4 (21.2,28.3)	23.9 (21.1,27.2)	23.7 (21.1,26.4)	23.7 (21.4,26.1)	25.1 (23.0,27.2)	24.2 (22.0,26.4)	23.8 (21.4,26.4)	23.1 (20.4,26.2)	23.2 (20.0,26.6)	21.4 (18.1,25.0)	20.3 (16.9,24.2)	19.4 (16.1,23.2)	-1.4 (-3.2,0.1)
Liberty County, FL	Male	29.2 (25.3,33.2)	28.7 (24.7,32.5)	28.3 (24.4,32.2)	27.5 (23.5,31.4)	27.1 (23.1,31.2)	27.9 (23.6,31.9)	27.8 (24.4,31.3)	28.4 (24.8,31.9)	28.2 (24.9,31.4)	28.1 (24.5,31.6)	26.2 (23.1,29.6)	25.8 (22.4,29.4)	24.4 (21.3,28.1)	24.5 (21.0,28.6)	22.5 (18.2,27.5)	22.1 (18.5,26.5)	21.0 (17.5,25.2)	-2.1 (-3.5,-0.5)
	Female	24.4 (19.1,30.6)	24.3 (19.5,29.9)	24.2 (19.7,29.1)	25.0 (20.4,29.7)	24.2 (19.7,28.8)	23.6 (19.7,28.0)	24.1 (20.3,28.2)	23.8 (20.3,27.5)	23.4 (20.4,26.7)	23.1 (20.0,26.2)	22.4 (19.2,25.9)	21.5 (17.8,25.6)	21.1 (17.4,25.4)	20.6 (15.9,25.9)	18.8 (14.4,24.1)	19.6 (15.7,24.6)	18.8 (15.0,23.5)	-1.6 (-3.6,0.5)
	Both	26.7 (22.3,31.9)	26.4 (22.2,31.1)	26.2 (22.0,30.5)	26.2 (21.9,30.5)	25.6 (21.4,30.0)	25.7 (21.7,29.8)	25.9 (22.2,29.7)	26.1 (22.5,29.6)	25.8 (22.7,29.0)	25.5 (22.4,28.7)	24.3 (21.1,27.7)	23.6 (20.3,27.3)	22.7 (19.2,26.7)	22.5 (18.9,26.8)	20.6 (17.2,25.1)	20.9 (17.1,25.5)	19.9 (16.2,24.3)	-1.9 (-3.5,-0.1)
Madison County, FL	Male	27.1 (23.4,31.2)	26.7 (23.1,30.8)	26.3 (22.7,30.5)	25.0 (21.4,29.1)	24.9 (21.2,29.1)	25.2 (21.5,29.4)	25.1 (21.9,28.6)	24.6 (21.6,28.0)	26.0 (23.1,29.2)	26.7 (23.9,29.7)	25.8 (23.4,28.7)	24.7 (22.1,27.7)	24.3 (21.6,27.4)	23.5 (20.5,27.0)	20.9 (16.7,25.6)	21.7 (18.2,26.0)	20.7 (17.3,24.9)	-1.7 (-3.1,-0.2)
	Female	18.5 (14.2,23.6)	18.5 (14.6,23.3)	18.4 (14.9,22.7)	19.7 (16.0,24.1)	19.4 (15.8,23.7)	20.2 (17.0,24.2)	21.1 (17.9,24.8)	20.5 (17.7,23.8)	19.9 (17.5,22.7)	20.8 (18.9,23.1)	20.4 (18.5,22.7)	19.3 (16.8,22.3)	19.3 (16.3,22.8)	18.3 (14.3,22.5)	18.3 (14.3,22.7)	16.9 (13.7,21.1)	16.2 (13.2,20.2)	-0.8 (-2.8,1.3)
	Both	22.7 (18.8,27.5)	22.5 (18.9,26.8)	22.3 (18.7,26.5)	22.3 (18.7,26.6)	22.1 (18.3,26.2)	22.7 (19.2,26.6)	23.1 (20.0,26.7)	22.5 (19.6,25.8)	22.9 (20.3,25.9)	23.7 (21.5,26.1)	23.0 (21.0,25.7)	21.9 (19.7,24.7)	21.7 (19.2,24.8)	20.8 (17.9,24.3)	19.6 (16.4,23.5)	19.3 (15.9,23.5)	18.4 (15.2,22.5)	-1.3 (-2.9,0.4)
Manatee County, FL	Male	25.5 (22.1,29.4)	25.1 (21.8,28.7)	24.5 (21.3,28.1)	24.1 (20.9,27.8)	23.0 (19.9,26.8)	23.0 (19.9,26.7)	21.9 (19.3,25.1)	21.6 (19.1,24.6)	21.4 (19.1,24.0)	20.5 (18.0,23.2)	20.6 (18.4,22.8)	19.9 (17.8,22.3)	20.2 (18.0,22.7)	19.3 (16.9,22.2)	18.6 (15.1,22.6)	18.2 (15.4,21.7)	17.3 (14.4,20.7)	-2.4 (-3.8,-1.1)
	Female	24.7 (20.3,29.9)	24.3 (20.3,29.0)	23.9 (20.1,28.2)	23.9 (20.3,28.1)	24.2 (20.8,28.1)	23.9 (20.9,27.5)	23.4 (20.8,26.7)	23.0 (20.6,25.8)	21.7 (19.7,23.9)	20.2 (18.3,22.1)	18.5 (16.6,20.7)	18.1 (15.6,20.9)	18.1 (15.2,21.2)	18.4 (14.8,22.3)	17.2 (13.6,21.2)	16.9 (13.8,20.6)	16.1 (13.2,19.6)	-2.7 (-4.4,-0.9)
	Both	25.1 (21.2,29.6)	24.7 (21.0,28.9)	24.2 (20.8,28.1)	24.0 (20.6,27.9)	23.6 (20.4,27.4)	23.4 (20.4,27.0)	22.7 (20.1,25.7)	22.3 (19.9,25.2)	21.6 (19.4,23.9)	20.3 (18.3,22.4)	19.5 (17.6,21.6)	19.0 (16.9,21.4)	19.1 (16.7,21.8)	18.9 (16.2,21.9)	17.9 (15.2,21.1)	17.6 (14.6,21.1)	16.7 (13.8,20.1)	-2.5 (-4.0,-1.0)
Marion County, FL	Male	27.2 (23.7,31.1)	27.0 (23.5,30.8)	26.6 (23.1,30.7)	27.0 (23.6,31.0)	26.9 (23.4,30.8)	26.8 (23.3,30.9)	26.3 (23.2,29.7)	25.2 (22.3,28.3)	24.8 (22.2,27.5)	23.7 (21.2,26.4)	22.4 (20.2,24.7)	21.3 (19.1,23.6)	20.9 (18.5,23.3)	21.0 (18.3,23.8)	19.7 (15.8,23.4)	20.7 (17.5,24.0)	19.7 (16.5,23.0)	-2.0 (-3.4,-0.7)
	Female	22.0 (17.9,27.1)	22.2 (18.5,26.9)	22.4 (18.9,26.4)	23.5 (19.9,27.5)	22.4 (19.1,26.3)	23.0 (20.1,26.2)	23.1 (20.4,26.2)	23.4 (21.1,26.0)	22.7 (20.7,24.8)	24.0 (22.2,25.8)	23.1 (21.2,25.1)	20.9 (18.2,23.7)	19.8 (16.8,23.0)	19.3 (15.4,23.0)	17.3 (13.4,21.2)	17.9 (14.7,21.2)	17.0 (14.0,20.2)	-1.6 (-3.4,0.1)
	Both	24.6 (20.9,29.0)	24.6 (21.1,28.6)	24.5 (20.9,28.4)	25.2 (21.7,29.2)	24.6 (21.2,28.5)	24.8 (21.7,28.4)	24.7 (21.8,27.9)	24.3 (21.7,27.2)	23.7 (21.5,26.2)	23.8 (21.8,26.0)	22.8 (20.8,24.7)	21.1 (19.0,23.4)	20.4 (17.8,23.0)	20.1 (17.3,23.2)	18.5 (15.5,21.5)	19.3 (16.1,22.6)	18.3 (15.3,21.5)	-1.8 (-3.4,-0.4)
Martin County, FL	Male	22.5 (19.3,25.9)	22.0 (19.1,25.3)	21.5 (18.5,24.7)	21.3 (18.3,24.6)	21.1 (18.0,24.5)	20.8 (17.7,24.4)	21.6 (18.8,24.6)	21.9 (19.3,24.9)	21.7 (19.3,24.3)	20.8 (18.3,23.5)	20.9 (18.7,23.3)	20.4 (18.1,22.8)	18.8 (16.5,21.2)	18.7 (16.1,21.6)	17.2 (13.5,21.2)	17.8 (14.8,21.1)	17.0 (14.0,20.2)	-1.8 (-3.2,-0.3)
	Female	20.5 (16.4,25.7)	20.4 (16.7,24.9)	20.3 (16.8,24.4)	20.9 (17.5,24.9)	20.9 (17.4,24.7)	20.8 (17.6,24.3)	20.2 (17.3,23.4)	18.6 (16.1,21.3)	17.2 (15.2,19.4)	17.1 (15.3,19.0)	17.5 (15.7,19.5)	17.2 (14.9,19.8)	16.9 (14.3,19.8)	17.1 (14.0,20.7)	16.2 (13.0,19.8)	14.1 (11.2,17.2)	13.4 (10.7,16.4)	-2.7 (-4.6,-0.7)
	Both	21.5 (18.0,25.7)	21.2 (18.0,25.1)	20.9 (17.7,24.4)	21.1 (17.9,24.7)	21.0 (17.7,24.6)	20.8 (17.8,24.3)	20.9 (18.1,23.9)	20.2 (17.7,23.0)	19.4 (17.2,21.8)	18.9 (17.0,21.1)	19.2 (17.2,21.3)	18.8 (16.7,21.1)	17.9 (15.6,20.2)	17.9 (15.4,20.6)	16.7 (14.0,19.6)	15.9 (13.0,19.1)	15.1 (12.3,18.2)	-2.2 (-3.8,-0.5)
Miami-Dade County, FL	Male	19.9 (17.8,22.4)	19.6 (17.5,21.8)	19.1 (17.1,21.2)	20.2 (18.2,22.4)	19.1 (17.2,21.1)	17.7 (15.8,19.7)	17.4 (15.8,19.3)	17.7 (16.0,19.5)	15.9 (14.6,17.5)	16.0 (14.5,17.8)	15.2 (13.9,16.6)	14.9 (13.5,16.3)	13.2 (11.8,14.7)	12.6 (11.0,14.3)	10.1 (8.1,12.5)	10.7 (8.9,12.8)	10.1 (8.4,12.1)	-4.2 (-5.7,-2.9)
	Female	12.4 (10.5,14.6)	12.3 (10.7,14.1)	12.1 (10.7,13.8)	12.0 (10.6,13.6)	12.1 (10.7,13.6)	12.0 (10.7,13.4)	11.7 (10.5,12.9)	11.4 (10.4,12.4)	11.7 (10.9,12.6)	11.1 (10.2,12.1)	10.4 (9.4,11.4)	10.3 (8.9,11.7)	9.9 (8.3,11.5)	8.8 (7.0,10.6)	8.0 (6.2,9.9)	7.9 (6.4,9.5)	7.6 (6.2,9.1)	-3.1 (-4.7,-1.5)
	Both	16.1 (14.1,18.3)	15.8 (14.1,17.9)	15.5 (13.8,17.4)	16.0 (14.3,17.9)	15.5 (13.9,17.3)	14.8 (13.3,16.5)	14.5 (13.1,16.0)	14.5 (13.2,15.9)	13.8 (12.7,15.0)	13.5 (12.5,14.8)	12.7 (11.6,13.9)	12.5 (11.3,13.9)	11.5 (10.1,13.0)	10.7 (9.2,12.3)	9.1 (7.6,10.8)	9.3 (7.6,11.1)	8.8 (7.3,10.6)	-3.7 (-5.2,-2.3)
Monroe County, FL	Male	22.2 (19.2,25.4)	21.9 (19.0,25.0)	21.5 (18.5,24.7)	23.4 (20.3,26.8)	22.5 (19.3,26.0)	22.1 (18.9,25.3)	20.9 (18.2,23.7)	21.6 (18.8,24.6)	20.5 (18.1,23.3)	20.8 (18.3,23.5)	19.8 (17.7,22.2)	20.0 (17.8,22.4)	18.7 (16.5,21.0)	18.0 (15.6,20.6)	15.0 (11.9,18.5)	14.3 (11.7,17.5)	13.6 (11.1,16.4)	-3.1 (-4.6,-1.6)
	Female	19.1 (15.3,23.7)	18.9 (15.4,23.0)	18.6 (15.3,22.2)	17.4 (14.3,20.8)	17.0 (13.9,20.3)	17.4 (14.5,20.6)	16.2 (13.7,19.1)	16.7 (14.3,19.5)	17.6 (15.4,20.2)	19.4 (17.4,21.5)	18.3 (16.3,20.4)	18.0 (15.6,20.6)	19.4 (16.8,22.3)	18.9 (15.6,22.6)	16.5 (13.3,20.2)	13.7 (10.8,17.0)	13.0 (10.2,16.2)	-2.4 (-4.3,-0.4)
	Both	20.6 (17.4,24.5)	20.4 (17.3,23.8)	20.0 (16.9,23.4)	20.3 (17.3,23.7)	19.7 (16.6,23.0)	19.7 (16.7,22.9)	18.5 (15.9,21.4)	19.1 (16.5,21.9)	19.0 (16.7,21.7)	20.1 (18.0,22.3)	19.0 (17.0,21.2)	19.0 (16.8,21.2)	19.1 (16.8,21.5)	18.4 (16.0,21.2)	15.8 (13.3,18.7)	14.0 (11.3,17.2)	13.3 (10.7,16.3)	-2.7 (-4.4,-1.0)
Nassau County, FL	Male	25.3 (21.8,29.2)	25.0 (21.6,28.7)	24.4 (21.0,28.2)	24.1 (20.8,27.8)	23.8 (20.2,27.5)	24.0 (20.6,27.9)	22.9 (20.0,26.1)	22.2 (19.3,25.3)	22.8 (20.0,25.8)	24.0 (21.3,27.0)	23.4 (21.0,26.1)	22.6 (20.0,25.3)	21.6 (19.2,24.2)	20.5 (17.9,23.5)	17.9 (14.3,21.7)	17.7 (14.5,21.0)	16.8 (13.7,20.0)	-2.6 (-4.0,-1.2)
	Female	21.2 (16.6,26.7)	21.2 (17.0,26.0)	21.0 (17.2,25.5)	20.9 (17.1,25.2)	19.1 (15.8,22.9)	18.9 (15.8,22.4)	18.1 (15.3,21.3)	17.5 (15.0,20.4)	16.5 (14.4,18.9)	19.3 (17.2,21.5)	20.0 (17.7,22.4)	20.2 (17.5,23.1)	19.3 (16.1,22.6)	20.0 (16.0,24.1)	18.4 (14.4,22.7)	18.3 (14.6,22.2)	17.5 (14.0,21.1)	-1.2 (-3.2,0.7)
	Both	23.2 (19.3,27.8)	23.0 (19.3,27.3)	22.7 (19.0,26.8)	22.5 (18.9,26.4)	21.4 (18.0,25.1)	21.4 (18.3,25.0)	20.5 (17.7,23.7)	19.8 (17.1,22.7)	19.6 (17.2,22.3)	21.6 (19.4,24.0)	21.7 (19.4,24.1)	21.4 (18.9,24.0)	20.4 (17.8,23.1)	20.3 (17.4,23.2)	18.2 (15.1,21.4)	18.0 (14.5,21.6)	17.1 (13.9,20.5)	-1.9 (-3.6,-0.4)
Okaloosa County, FL	Male	23.8 (20.6,27.4)	23.5 (20.3,27.0)	23.0 (19.9,26.4)	22.1 (19.1,25.5)	22.3 (19.2,25.7)	22.4 (19.3,25.7)	22.1 (19.4,25.0)	22.9 (20.1,25.9)	21.9 (19.3,24.6)	22.1 (19.5,24.8)	20.8 (18.5,23.2)	19.9 (17.6,22.3)	19.6 (17.4,22.0)	20.3 (17.8,23.1)	17.8 (14.3,21.3)	17.5 (14.7,20.7)	16.5 (13.8,19.7)	-2.3 (-3.7,-1.0)
	Female	19.4 (15.4,23.9)	19.3 (15.7,23.3)	19.1 (15.7,22.8)	18.5 (15.4,21.9)	19.2 (16.2,22.6)	18.7 (15.9,21.8)	17.8 (15.3,20.6)	16.2 (14.1,18.5)	16.6 (14.7,18.5)	17.1 (15.4,19.0)	17.2 (15.4,19.3)	17.8 (15.4,20.4)	18.7 (15.9,21.6)	19.0 (15.4,22.4)	17.8 (14.2,21.4)	15.6 (12.6,19.1)	14.8 (11.9,18.1)	-1.7 (-3.5,0.1)
	Both	21.6 (18.1,25.5)	21.3 (18.0,25.0)	21.0 (17.8,24.5)	20.3 (17.2,23.7)	20.7 (17.7,24.1)	20.5 (17.6,23.7)	19.9 (17.3,22.8)	19.5 (17.0,22.1)	19.2 (17.0,21.4)	19.6 (17.6,21.7)	18.9 (17.1,21.1)	18.8 (16.8,21.2)	19.1 (16.8,21.7)	19.6 (17.1,22.5)	17.8 (15.1,20.8)	16.5 (13.6,19.9)	15.6 (12.9,18.9)	-2.0 (-3.6,-0.5)
Okeechobee County, FL	Male	26.7 (23.0,30.5)	26.4 (22.9,30.2)	25.8 (22.3,29.7)	26.4 (22.9,30.4)	26.1 (22.3,30.0)	25.9 (22.2,29.9)	27.2 (24.0,30.6)	27.8 (24.7,31.1)	27.6 (24.8,30.4)	25.6 (22.8,28.3)	25.7 (23.1,28.4)	24.6 (21.9,27.3)	22.7 (20.0,25.8)	23.5 (20.4,27.0)	23.4 (19.0,28.0)	24.2 (20.6,28.6)	23.0 (19.5,27.3)	-0.9 (-2.4,0.5)
	Female	24.8 (19.2,30.2)	24.7 (19.8,29.8)	24.5 (20.1,29.3)	24.4 (20.2,29.1)	25.2 (21.0,29.9)	24.6 (21.1,28.3)	24.0 (20.9,27.2)	23.1 (20.6,25.9)	23.5 (21.3,25.9)	24.4 (22.4,26.5)	24.6 (22.4,27.1)	24.6 (21.4,28.1)	22.9 (19.3,27.0)	22.9 (18.3,27.6)	21.0 (16.5,25.9)	19.2 (15.7,23.6)	18.2 (15.0,22.4)	-1.9 (-3.8,0.1)
	Both	25.7 (21.2,30.3)	25.5 (21.4,29.8)	25.2 (21.3,29.5)	25.4 (21.6,29.8)	25.6 (21.8,29.9)	25.2 (21.8,29.1)	25.6 (22.5,28.9)	25.4 (22.6,28.4)	25.5 (23.0,28.1)	25.0 (22.8,27.1)	25.1 (22.9,27.6)	24.6 (22.1,27.4)	22.8 (20.0,26.1)	23.2 (19.9,26.9)	22.2 (18.9,26.2)	21.7 (18.1,26.1)	20.6 (17.2,24.8)	-1.4 (-3.1,0.3)
Orange County, FL	Male	22.3 (19.7,25.2)	21.9 (19.3,24.6)	21.3 (18.9,24.1)	21.1 (18.6,23.8)	21.6 (19.2,24.5)	21.6 (19.1,24.4)	22.3 (20.0,25.1)	21.5 (19.5,24.0)	21.2 (19.3,23.4)	18.6 (16.9,20.7)	17.7 (16.1,19.6)	17.1 (15.4,19.2)	16.1 (14.4,18.3)	15.9 (13.9,18.3)	15.9 (13.2,19.2)	16.1 (13.8,18.9)	15.2 (13.1,18.0)	-2.4 (-3.6,-1.1)
	Female	17.1 (14.3,20.2)	17.1 (14.6,19.9)	17.0 (14.7,19.5)	17.0 (14.8,19.5)	16.8 (14.7,19.2)	16.7 (14.8,19.1)	15.8 (14.2,17.8)	15.0 (13.6,16.6)	14.6 (13.4,16.0)	13.7 (12.5,15.0)	13.0 (11.7,14.5)	12.0 (10.3,13.9)	11.6 (9.7,13.8)	11.1 (8.7,13.7)	10.6 (8.1,13.2)	10.9 (9.0,13.4)	10.4 (8.7,12.7)	-3.1 (-4.7,-1.4)
	Both	19.7 (17.1,22.6)	19.4 (17.0,22.1)	19.1 (16.8,21.7)	19.0 (16.7,21.6)	19.2 (17.0,21.8)	19.1 (17.0,21.7)	19.0 (17.1,21.4)	18.2 (16.5,20.2)	17.8 (16.4,19.6)	16.1 (14.8,17.7)	15.3 (13.9,16.9)	14.5 (13.0,16.3)	13.9 (12.2,15.8)	13.4 (11.6,15.7)	13.2 (11.3,15.6)	13.5 (11.4,16.1)	12.8 (10.8,15.3)	-2.7 (-4.1,-1.3)
Osceola County, FL	Male	23.9 (20.5,27.4)	23.4 (20.0,26.7)	22.7 (19.5,26.1)	22.6 (19.4,26.1)	22.2 (19.0,25.8)	21.5 (18.3,25.0)	22.3 (19.5,25.4)	21.7 (19.1,24.7)	21.5 (19.2,24.2)	20.5 (18.1,23.1)	20.1 (18.1,22.4)	20.0 (17.9,22.3)	18.7 (16.7,21.1)	18.3 (15.9,21.1)	17.3 (14.0,21.0)	17.0 (14.3,20.4)	16.0 (13.4,19.3)	-2.5 (-3.9,-1.0)
	Female	22.2 (17.8,27.2)	21.8 (17.7,26.2)	21.2 (17.4,25.1)	20.7 (17.0,24.5)	21.3 (17.8,25.1)	19.2 (16.3,22.6)	18.8 (16.2,22.1)	16.7 (14.6,19.3)	16.3 (14.4,18.5)	15.7 (14.3,17.5)	15.8 (14.3,17.7)	15.0 (13.0,17.4)	14.9 (12.5,17.5)	14.9 (11.8,18.1)	13.9 (10.9,17.0)	12.7 (10.4,15.8)	12.0 (9.8,14.8)	-3.9 (-5.7,-1.9)
	Both	23.1 (19.1,27.3)	22.5 (18.9,26.3)	21.9 (18.5,25.5)	21.6 (18.2,25.2)	21.7 (18.4,25.4)	20.3 (17.3,23.8)	20.5 (17.8,23.7)	19.2 (16.9,21.9)	18.8 (16.7,21.3)	18.1 (16.3,20.1)	17.9 (16.3,19.9)	17.4 (15.7,19.6)	16.7 (14.8,19.1)	16.5 (14.3,19.2)	15.6 (13.2,18.5)	14.8 (12.3,18.0)	14.0 (11.6,17.0)	-3.1 (-4.7,-1.5)
Palm Beach County, FL	Male	20.9 (18.6,23.4)	20.6 (18.4,22.9)	20.1 (17.9,22.4)	19.8 (17.7,22.1)	18.9 (16.7,21.4)	18.8 (16.6,21.2)	19.0 (17.0,21.2)	19.1 (17.2,21.3)	18.4 (16.7,20.3)	18.7 (16.7,20.7)	18.3 (16.7,20.0)	17.8 (16.1,19.6)	16.8 (15.0,18.7)	17.0 (14.9,19.3)	15.2 (12.1,18.3)	15.6 (13.1,18.3)	14.7 (12.4,17.3)	-2.2 (-3.5,-1.0)
	Female	20.7 (17.8,23.7)	20.2 (17.9,22.7)	19.7 (17.6,21.9)	19.4 (17.4,21.6)	18.5 (16.5,20.8)	18.2 (16.3,20.5)	17.2 (15.5,19.1)	16.5 (15.1,18.2)	15.3 (14.0,16.6)	14.6 (13.3,15.9)	13.9 (12.5,15.4)	13.3 (11.5,15.3)	12.6 (10.6,14.7)	12.2 (9.8,14.7)	11.2 (8.7,13.7)	10.8 (8.7,13.3)	10.3 (8.3,12.6)	-4.4 (-5.9,-2.9)
	Both	20.8 (18.4,23.4)	20.4 (18.1,22.7)	19.9 (17.8,22.1)	19.6 (17.5,21.8)	18.7 (16.6,21.0)	18.5 (16.4,20.8)	18.1 (16.2,20.2)	17.8 (16.1,19.6)	16.8 (15.4,18.4)	16.6 (15.1,18.1)	16.1 (14.7,17.7)	15.5 (13.9,17.1)	14.7 (12.8,16.5)	14.6 (12.5,16.7)	13.2 (11.1,15.5)	13.2 (10.8,15.8)	12.5 (10.3,14.9)	-3.2 (-4.6,-1.9)
Pasco County, FL	Male	28.5 (25.0,32.4)	28.0 (24.6,31.7)	27.5 (24.0,31.0)	26.5 (23.2,30.1)	26.3 (22.9,29.8)	25.6 (22.2,29.2)	24.4 (21.4,27.5)	24.4 (21.5,27.4)	24.2 (21.6,26.9)	26.6 (23.7,29.5)	25.0 (22.5,27.5)	25.6 (23.1,28.1)	23.5 (21.0,26.0)	23.7 (20.7,26.5)	20.3 (16.1,24.4)	21.3 (17.9,24.7)	20.2 (16.9,23.6)	-2.1 (-3.5,-0.9)
	Female	24.4 (20.3,28.9)	24.3 (20.6,28.4)	24.0 (20.5,27.9)	21.5 (18.2,24.9)	22.3 (19.1,25.5)	22.3 (19.3,25.3)	23.2 (20.4,26.2)	22.9 (20.3,25.6)	24.8 (22.4,27.3)	25.5 (23.4,27.7)	24.5 (22.4,26.8)	24.1 (21.4,27.1)	22.9 (19.8,26.1)	22.2 (18.5,26.0)	20.2 (16.3,24.1)	18.2 (14.8,21.7)	17.4 (14.2,20.7)	-2.1 (-3.7,-0.5)
	Both	26.4 (22.7,30.6)	26.1 (22.7,30.1)	25.7 (22.3,29.3)	24.0 (20.6,27.5)	24.2 (20.9,27.6)	23.9 (20.7,27.3)	23.8 (20.9,26.8)	23.6 (21.0,26.4)	24.5 (22.0,27.1)	26.0 (23.7,28.4)	24.8 (22.5,27.0)	24.8 (22.5,27.3)	23.2 (20.5,25.9)	22.9 (20.0,25.9)	20.3 (17.0,23.3)	19.8 (16.3,23.2)	18.8 (15.5,22.1)	-2.1 (-3.6,-0.7)
Pinellas County, FL	Male	27.7 (24.7,30.8)	27.4 (24.5,30.3)	26.9 (24.1,29.8)	26.8 (24.0,29.6)	26.4 (23.6,29.2)	25.6 (22.7,28.5)	23.5 (20.8,26.0)	23.0 (20.4,25.4)	22.2 (19.8,24.3)	22.9 (20.4,25.5)	21.9 (19.9,24.0)	22.8 (20.7,25.1)	21.5 (19.3,23.9)	22.0 (19.6,24.8)	19.3 (15.7,23.2)	19.9 (17.0,23.3)	18.9 (16.1,22.2)	-2.4 (-3.6,-1.1)
	Female	22.3 (19.2,25.7)	21.9 (19.3,24.8)	21.5 (19.1,23.9)	20.3 (18.0,22.7)	19.7 (17.5,21.9)	18.9 (16.9,21.0)	19.9 (18.0,21.8)	19.3 (17.6,20.9)	20.1 (18.6,21.7)	20.8 (19.1,22.6)	20.6 (18.7,22.5)	20.2 (17.7,22.8)	21.6 (18.8,24.6)	21.4 (18.0,25.1)	19.7 (16.2,23.5)	16.2 (13.6,19.4)	15.5 (13.0,18.5)	-2.3 (-3.8,-0.8)
	Both	24.9 (22.0,28.1)	24.6 (21.9,27.3)	24.1 (21.6,26.7)	23.5 (20.9,26.1)	23.0 (20.5,25.5)	22.2 (19.8,24.6)	21.6 (19.4,23.9)	21.1 (19.0,23.1)	21.1 (19.2,22.9)	21.9 (20.0,23.7)	21.2 (19.5,23.3)	21.5 (19.4,23.7)	21.5 (19.3,24.0)	21.7 (19.2,24.5)	19.5 (17.0,22.4)	18.0 (15.3,21.3)	17.2 (14.5,20.4)	-2.3 (-3.7,-1.0)
Polk County, FL	Male	26.0 (22.7,29.9)	25.6 (22.5,29.3)	25.0 (22.0,28.4)	24.4 (21.3,27.9)	24.3 (21.3,27.6)	24.4 (21.5,27.8)	24.3 (21.7,27.3)	24.3 (21.7,27.3)	24.2 (21.8,26.7)	22.5 (19.9,25.2)	21.5 (19.3,23.8)	21.2 (18.8,23.6)	20.2 (17.6,22.7)	20.2 (17.3,23.1)	19.4 (15.3,23.2)	21.2 (17.8,24.8)	20.1 (16.8,23.6)	-1.6 (-3.0,-0.2)
	Female	21.6 (17.5,26.2)	21.7 (18.1,25.8)	21.7 (18.5,25.4)	21.6 (18.5,25.3)	22.2 (19.5,25.4)	22.1 (19.6,25.0)	22.4 (19.9,25.1)	21.3 (19.2,23.6)	22.3 (20.3,24.3)	20.4 (18.7,22.2)	19.2 (17.4,21.2)	17.8 (15.4,20.4)	18.0 (15.1,21.0)	17.2 (13.6,21.0)	16.2 (12.5,20.2)	16.2 (13.1,19.4)	15.4 (12.5,18.5)	-2.1 (-3.8,-0.4)
	Both	23.8 (20.1,28.0)	23.6 (20.3,27.5)	23.3 (20.3,27.0)	23.0 (19.9,26.6)	23.2 (20.4,26.5)	23.2 (20.5,26.4)	23.3 (20.8,26.1)	22.8 (20.5,25.4)	23.2 (21.1,25.5)	21.4 (19.5,23.6)	20.3 (18.4,22.3)	19.5 (17.4,21.7)	19.1 (16.6,21.7)	18.7 (15.9,21.7)	17.8 (14.7,20.9)	18.6 (15.4,22.0)	17.7 (14.6,21.0)	-1.8 (-3.3,-0.4)
Putnam County, FL	Male	27.8 (23.9,32.0)	27.6 (23.7,31.6)	27.3 (23.4,31.4)	27.1 (23.2,31.2)	26.9 (22.7,31.2)	27.9 (23.7,32.3)	28.2 (24.4,32.1)	27.1 (23.5,30.9)	26.9 (23.6,30.2)	27.6 (24.4,30.9)	26.5 (23.6,29.3)	25.6 (22.7,28.5)	25.6 (22.8,28.5)	26.1 (22.8,29.2)	23.8 (19.4,28.1)	23.3 (19.7,27.1)	22.2 (18.7,26.0)	-1.4 (-2.8,0.0)
	Female	26.5 (21.2,32.3)	26.3 (21.7,31.6)	26.1 (21.8,31.0)	25.1 (20.8,29.6)	24.8 (20.8,29.1)	25.0 (21.2,29.0)	25.4 (21.7,29.3)	24.7 (21.4,28.3)	24.3 (21.3,27.4)	25.6 (23.2,28.1)	24.9 (22.5,27.4)	24.2 (21.2,27.3)	21.5 (18.0,25.1)	21.1 (16.8,25.6)	18.3 (13.9,22.9)	19.3 (15.7,23.2)	18.5 (15.2,22.2)	-2.2 (-4.1,-0.5)
	Both	27.1 (22.8,32.1)	27.0 (22.9,31.6)	26.7 (22.5,31.0)	26.1 (22.0,30.4)	25.8 (21.7,30.2)	26.4 (22.4,30.7)	26.8 (23.2,30.7)	25.9 (22.5,29.5)	25.6 (22.4,28.8)	26.6 (23.9,29.3)	25.7 (23.2,28.2)	24.9 (22.4,27.6)	23.5 (20.7,26.5)	23.5 (20.5,27.0)	21.0 (17.6,24.6)	21.3 (17.7,25.2)	20.3 (16.9,24.1)	-1.8 (-3.4,-0.3)
Santa Rosa County, FL	Male	23.7 (20.5,27.1)	23.4 (20.2,26.8)	23.0 (19.7,26.4)	21.9 (18.8,25.2)	21.4 (18.2,24.7)	21.4 (18.2,24.8)	21.9 (19.0,24.7)	22.3 (19.4,25.2)	21.9 (19.3,24.6)	23.8 (21.1,26.6)	22.2 (19.8,24.6)	21.2 (18.9,23.5)	20.9 (18.7,23.1)	20.3 (17.8,22.9)	17.7 (14.2,21.3)	17.0 (14.2,19.9)	16.1 (13.5,18.9)	-2.4 (-3.8,-1.1)
	Female	19.1 (14.9,23.5)	19.3 (15.5,23.2)	19.3 (16.0,23.1)	19.8 (16.3,23.5)	20.3 (16.9,23.9)	20.8 (17.6,24.1)	20.6 (17.6,23.7)	19.4 (16.8,22.1)	19.6 (17.3,22.2)	19.5 (17.5,21.6)	19.2 (17.1,21.4)	18.8 (16.2,21.6)	18.1 (15.2,21.2)	17.5 (13.9,21.0)	16.9 (13.2,20.6)	16.7 (13.6,20.0)	15.9 (13.0,19.0)	-1.1 (-3.0,0.7)
	Both	21.4 (17.8,25.1)	21.3 (18.0,24.9)	21.1 (17.9,24.6)	20.8 (17.5,24.3)	20.8 (17.6,24.3)	21.1 (18.0,24.3)	21.2 (18.3,24.2)	20.8 (18.2,23.6)	20.8 (18.3,23.4)	21.6 (19.5,23.8)	20.6 (18.5,22.9)	20.0 (17.7,22.2)	19.5 (17.1,21.9)	18.9 (16.3,21.6)	17.3 (14.6,20.0)	16.9 (14.0,19.9)	16.0 (13.2,19.0)	-1.8 (-3.3,-0.3)
Sarasota County, FL	Male	23.3 (20.2,26.6)	22.9 (20.0,26.1)	22.4 (19.5,25.5)	22.7 (19.7,25.8)	21.8 (18.9,24.7)	21.5 (18.6,24.6)	20.8 (18.3,23.6)	21.2 (18.7,24.0)	20.3 (18.0,22.9)	23.1 (20.6,25.8)	23.1 (20.8,25.6)	22.3 (19.9,24.7)	21.8 (19.6,24.2)	22.5 (19.9,25.2)	19.4 (15.6,23.1)	18.5 (15.6,21.8)	17.6 (14.6,20.8)	-1.8 (-3.1,-0.3)
	Female	23.2 (18.9,27.6)	23.0 (19.3,26.7)	22.6 (19.2,26.0)	22.9 (19.6,26.3)	21.9 (18.9,25.0)	21.1 (18.4,23.9)	20.1 (17.7,22.8)	21.0 (18.7,23.4)	19.6 (17.5,21.7)	20.1 (18.2,22.1)	19.7 (17.7,22.0)	18.7 (16.0,21.8)	18.0 (15.0,21.5)	18.5 (14.6,22.8)	17.0 (13.3,21.5)	17.5 (14.4,21.1)	16.7 (13.6,20.2)	-2.1 (-3.7,-0.2)
	Both	23.3 (19.7,26.9)	22.9 (19.5,26.3)	22.5 (19.4,25.7)	22.8 (19.7,26.0)	21.8 (18.9,24.9)	21.3 (18.6,24.3)	20.5 (18.0,23.2)	21.1 (18.7,23.6)	19.9 (17.8,22.3)	21.6 (19.5,23.7)	21.4 (19.3,23.5)	20.4 (18.3,22.9)	19.9 (17.4,22.7)	20.4 (17.6,23.7)	18.2 (15.4,21.4)	18.0 (15.0,21.5)	17.1 (14.1,20.5)	-1.9 (-3.5,-0.3)
Seminole County, FL	Male	21.5 (18.5,24.6)	21.1 (18.2,23.9)	20.6 (17.9,23.4)	20.4 (17.6,23.1)	19.7 (17.1,22.6)	19.4 (16.7,22.2)	20.5 (18.0,23.1)	20.0 (17.6,22.7)	20.5 (18.1,23.2)	18.2 (15.9,20.6)	17.3 (15.3,19.6)	16.5 (14.4,18.6)	17.1 (15.1,19.3)	16.6 (14.3,19.1)	16.6 (13.4,19.8)	15.2 (12.6,18.1)	14.4 (11.9,17.2)	-2.5 (-4.0,-1.1)
	Female	19.5 (15.7,23.9)	19.3 (15.9,23.1)	19.0 (15.9,22.3)	17.6 (14.8,20.5)	18.0 (15.3,20.8)	18.8 (16.2,21.6)	16.5 (14.2,19.0)	16.3 (14.2,18.7)	16.3 (14.5,18.5)	14.9 (13.3,16.6)	14.1 (12.5,15.9)	14.2 (12.0,16.5)	13.8 (11.3,16.3)	13.3 (10.2,16.4)	12.6 (9.5,15.8)	12.3 (9.8,15.2)	11.7 (9.3,14.4)	-3.2 (-5.2,-1.3)
	Both	20.5 (17.3,24.2)	20.2 (17.1,23.4)	19.8 (16.8,22.7)	19.0 (16.1,21.8)	18.8 (16.2,21.6)	19.1 (16.6,21.8)	18.4 (16.1,21.0)	18.1 (15.9,20.7)	18.4 (16.3,20.8)	16.5 (14.7,18.5)	15.7 (13.9,17.6)	15.3 (13.4,17.3)	15.4 (13.3,17.7)	14.9 (12.6,17.5)	14.6 (12.3,17.1)	13.7 (11.2,16.6)	13.0 (10.6,15.7)	-2.8 (-4.6,-1.2)
St. Johns County, FL	Male	19.9 (17.0,23.1)	19.6 (16.7,22.8)	19.2 (16.4,22.4)	18.7 (15.9,21.9)	19.1 (16.1,22.1)	18.5 (15.6,21.6)	18.3 (15.7,20.8)	17.6 (15.2,20.0)	17.7 (15.5,19.9)	18.4 (16.1,20.7)	17.7 (15.6,19.7)	17.2 (15.2,19.3)	17.2 (15.2,19.2)	16.4 (14.3,18.6)	14.3 (11.4,17.3)	13.2 (10.9,15.8)	12.5 (10.3,15.1)	-2.9 (-4.4,-1.4)
	Female	19.9 (15.9,24.7)	19.8 (16.1,24.0)	19.7 (16.2,23.4)	19.0 (15.8,22.6)	18.1 (15.1,21.5)	19.0 (16.1,22.0)	18.5 (15.8,21.4)	17.3 (14.9,19.9)	16.6 (14.5,18.8)	16.6 (14.7,18.4)	15.0 (13.3,16.8)	14.8 (12.7,17.0)	14.1 (11.8,16.6)	13.9 (11.0,16.8)	12.4 (9.6,15.4)	11.7 (9.3,14.6)	11.1 (8.9,13.9)	-3.6 (-5.5,-1.8)
	Both	19.9 (16.5,23.9)	19.7 (16.5,23.2)	19.5 (16.4,22.8)	18.8 (15.8,22.2)	18.6 (15.6,21.8)	18.7 (15.8,21.7)	18.4 (15.7,21.1)	17.5 (15.1,19.9)	17.2 (15.0,19.4)	17.5 (15.6,19.3)	16.3 (14.5,18.2)	16.0 (14.1,17.9)	15.6 (13.7,17.8)	15.1 (13.0,17.4)	13.3 (11.2,15.8)	12.4 (10.1,15.2)	11.8 (9.6,14.5)	-3.3 (-4.9,-1.6)
St. Lucie County, FL	Male	25.9 (22.3,29.5)	25.4 (22.1,28.9)	24.8 (21.5,28.2)	24.2 (21.0,27.6)	24.5 (21.2,28.0)	24.0 (20.7,27.4)	25.8 (22.9,28.9)	26.3 (23.4,29.4)	26.5 (23.9,29.3)	24.8 (22.3,27.6)	24.6 (22.3,27.0)	23.0 (20.6,25.4)	21.5 (19.1,24.1)	20.7 (17.8,23.7)	18.4 (14.6,22.4)	19.6 (16.4,23.1)	18.6 (15.5,22.0)	-2.1 (-3.4,-0.6)
	Female	24.2 (19.7,29.1)	23.9 (19.8,28.3)	23.5 (19.8,27.3)	23.7 (20.0,27.6)	23.5 (20.0,27.2)	23.5 (20.4,26.9)	23.0 (20.2,26.1)	22.3 (19.8,25.0)	21.1 (19.1,23.4)	21.0 (19.1,23.0)	19.9 (17.9,22.0)	19.0 (16.3,21.9)	18.3 (15.4,21.6)	18.7 (14.9,22.6)	16.3 (12.6,20.3)	16.4 (13.2,19.9)	15.7 (12.7,18.9)	-2.7 (-4.6,-1.0)
	Both	25.0 (21.0,29.3)	24.6 (21.0,28.4)	24.1 (20.7,27.8)	24.0 (20.5,27.6)	24.0 (20.5,27.5)	23.7 (20.6,27.0)	24.4 (21.5,27.5)	24.3 (21.7,27.1)	23.8 (21.4,26.3)	22.9 (20.9,25.0)	22.2 (20.1,24.4)	21.0 (18.7,23.4)	19.9 (17.4,22.6)	19.7 (16.8,22.8)	17.3 (14.3,20.5)	18.0 (14.8,21.5)	17.1 (14.0,20.4)	-2.4 (-4.0,-0.9)
Sumter County, FL	Male	26.2 (22.5,30.1)	25.7 (22.1,29.5)	25.3 (21.7,29.1)	24.7 (21.0,28.4)	24.5 (20.7,28.3)	24.4 (20.6,28.3)	23.6 (20.6,26.9)	23.9 (20.9,27.1)	24.8 (21.8,27.8)	25.2 (22.2,28.3)	23.5 (20.8,26.4)	23.9 (21.1,26.8)	22.2 (19.5,25.0)	21.5 (18.2,24.7)	19.6 (15.2,23.8)	21.9 (18.2,25.7)	20.9 (17.3,24.7)	-1.4 (-2.9,0.0)
	Female	24.1 (18.9,29.8)	24.0 (19.3,29.4)	23.8 (19.3,28.5)	22.3 (18.3,26.8)	22.5 (18.6,26.7)	23.5 (19.7,27.5)	23.9 (20.3,27.6)	24.6 (21.2,28.2)	25.0 (21.8,28.1)	24.4 (21.8,27.2)	22.9 (20.4,25.6)	21.9 (18.8,25.2)	19.6 (16.1,23.4)	19.9 (15.5,24.5)	17.5 (13.0,22.1)	18.2 (14.5,22.2)	17.4 (13.8,21.2)	-2.1 (-4.0,0.0)
	Both	25.1 (20.7,30.1)	24.8 (20.7,29.3)	24.5 (20.6,28.7)	23.5 (19.6,27.5)	23.5 (19.7,27.5)	23.9 (20.2,27.7)	23.7 (20.4,27.3)	24.3 (21.0,27.5)	24.9 (21.9,28.0)	24.8 (22.1,27.5)	23.2 (20.7,25.9)	22.9 (20.2,25.8)	20.9 (18.1,24.0)	20.6 (17.4,24.1)	18.5 (15.1,22.1)	20.0 (16.3,23.9)	19.1 (15.5,23.0)	-1.7 (-3.4,0.0)
Suwannee County, FL	Male	26.6 (22.8,30.3)	26.2 (22.6,30.0)	25.6 (22.2,29.3)	25.0 (21.6,28.7)	24.4 (20.7,28.2)	25.3 (21.7,29.1)	25.5 (22.2,28.8)	25.0 (21.8,28.1)	26.3 (23.5,29.2)	27.5 (24.7,30.6)	26.5 (23.9,29.2)	26.6 (24.0,29.5)	25.9 (23.3,28.9)	24.9 (21.9,28.2)	22.3 (18.2,26.8)	21.9 (18.5,26.1)	20.8 (17.5,24.9)	-1.5 (-2.9,0.0)
	Female	20.8 (16.1,26.1)	20.6 (16.3,25.2)	20.4 (16.4,24.5)	21.3 (17.4,25.4)	21.1 (17.5,25.0)	20.3 (17.1,23.6)	21.8 (18.7,24.9)	22.5 (19.8,25.1)	23.2 (20.9,25.5)	25.3 (23.2,27.6)	26.5 (24.2,29.2)	25.9 (22.9,29.1)	23.9 (20.6,27.7)	23.5 (19.3,28.1)	20.9 (16.8,25.7)	20.6 (17.1,24.9)	19.6 (16.3,23.7)	-0.4 (-2.2,1.6)
	Both	23.6 (19.3,27.9)	23.4 (19.4,27.3)	23.0 (19.4,27.0)	23.1 (19.5,27.0)	22.7 (19.1,26.6)	22.8 (19.3,26.4)	23.6 (20.4,26.8)	23.7 (20.8,26.5)	24.7 (22.2,27.3)	26.4 (24.1,28.8)	26.5 (24.1,29.1)	26.2 (23.7,29.2)	24.9 (22.1,28.1)	24.2 (21.1,27.7)	21.6 (18.5,25.5)	21.2 (17.8,25.5)	20.2 (16.8,24.2)	-1.0 (-2.5,0.7)
Taylor County, FL	Male	28.1 (24.3,32.2)	27.7 (24.1,31.7)	27.3 (23.7,31.2)	26.7 (23.2,30.7)	26.4 (22.7,30.5)	26.1 (22.6,30.1)	26.7 (23.6,30.1)	26.4 (23.5,29.8)	26.2 (23.6,29.3)	26.3 (23.5,29.2)	25.7 (23.3,28.5)	25.2 (22.7,28.0)	26.2 (23.5,29.3)	26.7 (23.6,30.2)	26.3 (22.1,30.7)	22.7 (19.2,26.9)	21.5 (18.1,25.8)	-1.7 (-3.0,-0.2)
	Female	22.8 (17.8,28.5)	22.7 (18.2,28.0)	22.6 (18.4,27.2)	23.1 (19.2,27.6)	22.6 (18.8,27.0)	23.5 (20.1,27.6)	23.4 (20.3,27.1)	24.3 (21.7,27.6)	22.9 (20.7,25.6)	24.5 (22.4,26.8)	25.3 (23.0,28.1)	24.4 (21.3,27.8)	23.8 (20.3,27.7)	23.8 (19.4,28.7)	23.0 (18.6,28.0)	21.1 (17.4,25.6)	20.2 (16.7,24.5)	-0.7 (-2.6,1.2)
	Both	25.4 (21.1,30.3)	25.2 (21.2,29.7)	24.9 (21.1,29.2)	24.9 (21.2,29.1)	24.5 (20.6,28.7)	24.8 (21.3,28.7)	25.0 (21.9,28.5)	25.3 (22.6,28.6)	24.5 (22.2,27.5)	25.3 (23.2,27.8)	25.5 (23.3,28.2)	24.8 (22.3,27.7)	25.0 (22.2,28.2)	25.2 (22.0,29.0)	24.6 (21.3,28.5)	21.9 (18.3,26.3)	20.9 (17.4,25.1)	-1.2 (-2.8,0.5)
Union County, FL	Male	27.7 (23.7,31.9)	27.3 (23.3,31.6)	27.2 (23.2,31.4)	27.3 (23.3,31.7)	26.7 (22.7,31.3)	28.4 (24.1,33.1)	28.4 (24.7,32.3)	29.2 (25.6,32.9)	28.5 (25.2,31.9)	27.7 (24.5,31.1)	27.1 (24.3,29.9)	27.1 (24.2,30.1)	28.3 (25.4,31.3)	27.9 (24.3,31.4)	28.2 (23.6,32.7)	23.4 (19.5,27.4)	22.3 (18.5,26.2)	-1.3 (-2.9,0.1)
	Female	21.7 (16.5,27.8)	21.8 (17.2,27.5)	21.8 (17.3,26.9)	21.7 (17.4,26.6)	21.3 (17.2,26.0)	21.8 (18.0,26.1)	22.0 (18.5,26.0)	21.9 (18.8,25.5)	22.0 (19.1,25.0)	24.6 (22.2,26.9)	24.6 (22.1,27.2)	24.5 (21.2,27.9)	24.2 (20.3,28.1)	22.3 (17.5,27.2)	20.5 (15.5,25.4)	21.1 (17.1,25.4)	20.2 (16.3,24.3)	-0.5 (-2.5,1.6)
	Both	24.6 (20.2,29.9)	24.5 (20.2,29.3)	24.4 (20.2,29.1)	24.5 (20.3,29.1)	24.0 (19.9,28.5)	25.0 (21.0,29.3)	25.1 (21.5,28.9)	25.5 (22.1,29.1)	25.2 (22.2,28.4)	26.1 (23.5,28.6)	25.8 (23.3,28.4)	25.8 (23.0,28.7)	26.2 (23.1,29.4)	25.1 (21.4,28.7)	24.2 (20.6,27.9)	22.2 (18.3,26.4)	21.2 (17.4,25.2)	-0.9 (-2.7,0.8)
Volusia County, FL	Male	26.2 (23.2,29.3)	26.0 (23.1,29.0)	25.6 (22.7,28.6)	26.1 (23.2,29.1)	26.6 (23.6,29.6)	26.9 (23.8,29.9)	27.2 (24.3,30.2)	26.4 (23.5,29.5)	26.7 (23.9,29.5)	25.0 (22.2,28.0)	24.9 (22.5,27.5)	23.8 (21.3,26.5)	23.5 (21.1,26.3)	23.7 (20.9,26.8)	23.1 (19.2,27.0)	21.1 (17.8,24.8)	20.1 (16.9,23.7)	-1.7 (-2.9,-0.4)
	Female	23.5 (19.7,27.3)	23.6 (20.2,27.1)	23.7 (20.7,26.6)	23.2 (20.3,26.0)	23.2 (20.4,25.8)	23.8 (21.2,26.4)	21.4 (19.0,23.8)	20.6 (18.5,22.9)	21.2 (19.2,23.4)	20.3 (18.3,22.5)	19.6 (17.5,22.0)	19.1 (16.5,21.9)	19.6 (16.6,22.7)	19.8 (16.2,23.6)	18.5 (14.5,22.3)	17.9 (14.6,21.6)	17.0 (13.9,20.6)	-2.0 (-3.6,-0.5)
	Both	24.8 (21.4,28.3)	24.8 (21.7,27.9)	24.6 (21.7,27.6)	24.6 (21.7,27.5)	24.8 (22.0,27.6)	25.3 (22.5,28.0)	24.3 (21.6,26.9)	23.5 (21.0,26.1)	23.9 (21.5,26.4)	22.6 (20.4,25.0)	22.2 (20.0,24.6)	21.4 (19.1,24.0)	21.6 (19.0,24.3)	21.7 (18.8,24.7)	20.7 (17.8,23.9)	19.5 (16.2,23.2)	18.5 (15.4,22.0)	-1.8 (-3.2,-0.5)
Wakulla County, FL	Male	25.1 (21.5,28.9)	24.7 (21.0,28.4)	24.1 (20.5,27.7)	23.3 (19.8,26.9)	23.1 (19.5,26.9)	24.3 (20.5,28.1)	24.7 (21.5,28.0)	25.3 (22.0,28.4)	25.8 (22.8,28.7)	25.4 (22.5,28.0)	24.9 (22.4,27.5)	24.7 (22.2,27.3)	24.6 (22.1,27.3)	23.9 (21.2,27.0)	23.2 (19.2,27.3)	20.4 (17.3,24.1)	19.5 (16.4,23.1)	-1.6 (-3.0,-0.2)
	Female	19.8 (15.5,25.0)	19.7 (15.7,24.4)	19.5 (15.6,23.9)	20.4 (16.4,24.6)	19.8 (16.0,23.7)	18.7 (15.6,22.2)	20.1 (17.0,23.4)	20.5 (17.7,23.5)	19.8 (17.6,22.3)	21.7 (19.7,23.8)	21.4 (19.3,23.7)	20.2 (17.4,23.1)	20.1 (16.8,23.3)	20.0 (16.0,24.1)	17.9 (13.8,22.0)	17.8 (14.5,21.6)	16.9 (13.9,20.6)	-1.0 (-3.0,1.2)
	Both	22.4 (18.5,26.8)	22.1 (18.4,26.2)	21.8 (18.0,25.6)	21.8 (18.0,25.8)	21.4 (17.7,25.2)	21.5 (18.1,25.0)	22.4 (19.2,25.6)	22.8 (19.9,25.9)	22.7 (20.2,25.4)	23.5 (21.3,25.8)	23.1 (21.0,25.4)	22.4 (20.1,25.0)	22.3 (19.7,25.0)	22.0 (19.1,25.0)	20.5 (17.6,23.9)	19.1 (15.9,22.9)	18.2 (15.1,21.8)	-1.3 (-3.0,0.3)
Walton County, FL	Male	26.2 (22.5,29.8)	25.8 (22.2,29.3)	25.3 (21.8,28.8)	24.7 (21.1,28.2)	24.7 (21.1,28.5)	25.2 (21.5,28.8)	25.3 (22.2,28.4)	26.9 (24.0,29.9)	26.0 (23.5,28.7)	27.6 (25.0,30.4)	26.8 (24.6,29.3)	25.5 (23.2,28.1)	24.3 (22.0,27.0)	24.1 (21.5,27.3)	21.5 (18.0,25.5)	20.2 (17.2,23.9)	19.2 (16.3,22.8)	-1.9 (-3.2,-0.5)
	Female	20.4 (16.0,25.5)	20.4 (16.4,24.9)	20.2 (16.5,24.3)	20.0 (16.3,24.0)	20.1 (16.5,23.9)	20.9 (17.7,24.3)	20.9 (18.1,23.9)	20.0 (17.7,22.6)	20.2 (18.3,22.3)	21.8 (20.0,23.8)	21.4 (19.4,23.5)	21.2 (18.7,24.0)	21.5 (18.8,24.7)	21.4 (17.9,25.1)	19.1 (15.7,23.1)	16.0 (13.1,19.6)	15.1 (12.4,18.5)	-1.9 (-3.8,0.1)
	Both	23.2 (19.3,27.5)	23.0 (19.4,26.9)	22.7 (19.1,26.5)	22.3 (18.6,26.0)	22.4 (18.8,26.1)	23.0 (19.6,26.5)	23.1 (20.1,26.1)	23.4 (20.8,26.2)	23.1 (20.9,25.4)	24.7 (22.6,26.9)	24.1 (22.0,26.3)	23.3 (21.1,25.7)	22.9 (20.6,25.6)	22.7 (20.2,25.8)	20.3 (17.6,23.6)	18.0 (15.1,21.7)	17.1 (14.4,20.6)	-1.9 (-3.4,-0.3)
Washington County, FL	Male	27.1 (23.4,31.0)	26.7 (23.1,30.6)	26.2 (22.7,30.3)	25.6 (22.0,29.6)	25.2 (21.6,29.5)	26.7 (23.0,31.1)	27.2 (24.0,30.9)	28.7 (25.6,32.3)	27.5 (24.7,30.6)	29.2 (26.3,32.4)	27.8 (25.5,30.6)	26.5 (24.0,29.3)	25.3 (22.7,28.2)	26.3 (23.3,29.5)	23.0 (18.6,27.4)	23.6 (20.0,27.6)	22.5 (19.0,26.4)	-1.2 (-2.6,0.2)
	Female	22.0 (17.1,27.8)	22.0 (17.7,27.1)	21.8 (17.7,26.4)	21.6 (17.6,26.1)	21.0 (17.3,25.5)	21.6 (18.3,25.7)	21.3 (18.4,25.0)	21.2 (18.7,24.2)	23.4 (21.1,25.9)	24.5 (22.5,26.9)	24.7 (22.4,27.1)	24.5 (21.2,27.6)	24.7 (21.0,28.4)	24.8 (20.1,29.4)	22.5 (17.8,27.2)	20.4 (16.7,24.5)	19.5 (16.0,23.5)	-0.7 (-2.7,1.2)
	Both	24.5 (20.4,29.3)	24.3 (20.4,28.6)	24.0 (20.1,28.2)	23.5 (19.8,27.9)	23.1 (19.5,27.5)	24.2 (20.7,28.3)	24.2 (21.1,27.9)	24.9 (22.2,28.2)	25.4 (22.9,28.1)	26.8 (24.7,29.3)	26.2 (24.0,28.7)	25.5 (22.9,28.2)	25.0 (22.1,28.1)	25.5 (22.2,29.0)	22.7 (19.4,26.4)	22.0 (18.4,26.1)	21.0 (17.5,24.9)	-1.0 (-2.7,0.7)
Appling County, GA	Male	28.9 (25.1,33.3)	28.2 (24.6,32.5)	27.7 (24.0,31.9)	27.0 (23.4,31.2)	24.9 (21.4,28.9)	26.4 (22.8,30.7)	26.1 (23.0,29.6)	26.7 (23.6,30.4)	26.0 (23.0,29.3)	25.2 (22.0,28.7)	24.8 (21.8,28.1)	24.1 (21.2,27.4)	23.2 (20.5,26.5)	21.8 (18.6,25.6)	20.7 (16.3,25.6)	20.6 (17.3,24.5)	19.8 (16.6,23.5)	-2.4 (-3.8,-0.9)
	Female	21.1 (16.6,27.2)	21.0 (16.9,26.3)	21.0 (17.1,25.9)	21.7 (17.8,26.4)	20.3 (16.7,24.5)	20.0 (16.8,23.8)	19.6 (16.6,23.1)	19.3 (16.5,22.4)	17.9 (15.6,20.5)	18.6 (16.3,21.3)	19.0 (16.5,21.8)	18.8 (15.7,22.0)	17.8 (14.4,21.4)	18.3 (14.1,22.7)	17.3 (13.1,21.7)	19.0 (15.3,23.3)	18.4 (14.9,22.4)	-0.9 (-2.9,1.1)
	Both	24.9 (20.8,30.1)	24.6 (20.7,29.4)	24.3 (20.6,28.8)	24.3 (20.6,28.7)	22.6 (19.0,26.6)	23.2 (19.9,27.1)	22.8 (19.8,26.3)	23.0 (20.0,26.3)	21.9 (19.2,24.8)	21.8 (19.2,24.8)	21.8 (19.2,24.8)	21.4 (18.7,24.5)	20.5 (17.5,23.7)	20.0 (16.9,23.5)	19.0 (15.8,22.9)	19.8 (16.3,23.9)	19.1 (15.7,23.0)	-1.7 (-3.4,-0.1)
Atkinson County, GA	Male	28.8 (24.9,32.9)	28.0 (24.3,32.0)	27.3 (23.6,31.3)	26.6 (22.9,30.4)	24.4 (21.0,28.6)	25.7 (21.9,29.9)	25.4 (22.2,29.0)	25.1 (22.0,28.6)	24.1 (21.2,27.3)	22.9 (19.8,26.3)	22.4 (19.5,25.6)	21.8 (18.7,25.2)	22.2 (18.9,25.7)	21.3 (17.7,25.1)	21.8 (17.1,26.9)	21.3 (17.5,25.2)	20.3 (16.6,24.2)	-2.2 (-3.6,-0.7)
	Female	22.0 (17.2,27.9)	21.6 (17.3,26.8)	21.3 (17.2,25.7)	21.7 (17.8,26.1)	20.5 (16.9,24.7)	20.3 (17.2,24.1)	19.7 (16.8,23.3)	19.2 (16.5,22.4)	18.9 (16.5,21.7)	19.2 (16.6,22.0)	19.3 (16.6,22.4)	19.4 (16.2,23.2)	19.1 (15.6,23.3)	18.4 (14.2,23.3)	17.8 (13.5,22.6)	18.0 (14.0,22.1)	17.4 (13.6,21.4)	-1.5 (-3.5,0.7)
	Both	25.3 (21.0,30.1)	24.8 (20.7,29.1)	24.3 (20.5,28.4)	24.1 (20.3,28.2)	22.4 (18.8,26.6)	22.9 (19.6,27.0)	22.5 (19.4,26.1)	22.1 (19.2,25.4)	21.4 (18.9,24.4)	21.0 (18.4,24.0)	20.8 (18.0,23.9)	20.6 (17.6,24.0)	20.6 (17.4,24.3)	19.9 (16.5,23.6)	19.8 (16.0,23.6)	19.6 (15.7,23.6)	18.8 (15.1,22.8)	-1.8 (-3.6,-0.1)
Bacon County, GA	Male	30.3 (26.2,34.7)	29.6 (25.6,33.9)	29.2 (25.1,33.5)	28.6 (24.6,32.9)	26.6 (22.6,30.8)	28.0 (23.9,32.4)	27.5 (24.0,31.3)	28.1 (24.5,31.9)	27.6 (24.4,30.9)	26.7 (23.1,30.6)	27.0 (23.7,30.5)	26.6 (23.2,30.2)	25.5 (22.2,29.2)	24.3 (20.5,28.2)	23.9 (18.6,29.5)	23.6 (19.6,28.1)	22.6 (18.6,27.0)	-1.8 (-3.3,-0.3)
	Female	22.9 (17.5,29.0)	22.7 (18.0,28.1)	22.5 (18.1,27.5)	23.5 (19.2,28.5)	22.0 (17.9,26.7)	22.3 (18.5,26.4)	22.0 (18.5,25.8)	22.3 (19.2,25.6)	21.7 (19.0,24.6)	22.0 (19.3,24.9)	22.4 (19.5,25.5)	22.4 (19.0,26.0)	21.3 (17.7,25.2)	20.8 (16.1,25.7)	18.6 (14.2,23.4)	19.5 (15.3,24.3)	18.7 (14.8,23.3)	-1.2 (-3.3,0.9)
	Both	26.5 (22.0,31.6)	26.1 (21.8,30.8)	25.8 (21.7,30.4)	26.0 (21.8,30.6)	24.3 (20.2,28.7)	25.1 (21.2,29.3)	24.7 (21.2,28.5)	25.1 (21.8,28.7)	24.6 (21.7,27.7)	24.3 (21.3,27.5)	24.6 (21.6,27.8)	24.4 (21.4,27.8)	23.4 (20.1,27.1)	22.5 (19.0,26.5)	21.2 (17.3,25.4)	21.5 (17.4,26.1)	20.7 (16.7,25.1)	-1.6 (-3.3,0.2)
Baker County, GA	Male	26.3 (22.3,30.7)	25.7 (21.9,30.0)	25.3 (21.4,29.6)	23.8 (20.1,28.1)	22.2 (18.5,26.6)	23.5 (19.7,28.1)	23.4 (20.0,27.2)	23.6 (20.2,27.3)	23.5 (20.3,27.0)	23.6 (20.0,27.6)	23.0 (19.6,26.6)	22.1 (18.7,25.8)	22.3 (19.0,26.2)	23.0 (19.1,27.5)	22.8 (17.6,28.2)	22.8 (18.8,27.5)	21.9 (18.0,26.5)	-1.1 (-2.7,0.4)
	Female	17.3 (13.2,22.3)	17.1 (13.2,21.8)	17.0 (13.5,21.6)	17.5 (13.9,22.0)	17.0 (13.5,21.3)	17.5 (14.2,21.4)	17.0 (13.9,20.6)	16.6 (13.8,19.8)	16.6 (14.0,19.5)	16.4 (14.0,19.2)	16.2 (13.7,19.2)	16.1 (13.1,19.5)	16.2 (12.9,20.1)	15.9 (11.9,20.3)	16.1 (12.2,20.6)	16.1 (12.5,20.6)	15.5 (12.1,19.6)	-0.7 (-3.0,1.6)
	Both	21.7 (17.6,26.4)	21.3 (17.6,25.9)	21.1 (17.4,25.4)	20.6 (17.0,24.9)	19.6 (15.9,23.9)	20.5 (16.9,24.7)	20.1 (16.9,23.9)	20.1 (16.9,23.5)	20.0 (17.1,23.2)	19.9 (17.2,23.1)	19.5 (16.7,22.8)	19.0 (16.1,22.5)	19.2 (16.1,23.0)	19.4 (15.9,23.5)	19.4 (15.8,23.7)	19.4 (15.6,24.0)	18.6 (15.0,23.0)	-1.0 (-2.7,0.8)
Baldwin County, GA	Male	27.8 (24.0,32.1)	27.1 (23.6,31.3)	26.7 (23.1,30.7)	25.8 (22.3,29.8)	24.2 (20.5,28.3)	25.7 (22.1,29.9)	25.3 (22.1,28.9)	25.4 (22.2,29.0)	25.0 (22.2,28.3)	24.6 (21.3,28.2)	23.9 (20.8,27.3)	23.5 (20.4,27.1)	23.2 (20.2,26.7)	21.5 (18.3,25.5)	21.3 (17.0,26.6)	21.1 (17.6,25.6)	20.2 (16.8,24.5)	-2.0 (-3.5,-0.5)
	Female	17.1 (13.1,22.2)	17.0 (13.4,21.6)	17.0 (13.6,21.2)	17.3 (14.1,21.2)	16.4 (13.3,20.1)	18.2 (15.2,21.8)	17.6 (14.8,21.0)	17.5 (15.0,20.6)	16.7 (14.4,19.4)	17.7 (15.4,20.5)	16.5 (14.1,19.2)	17.1 (14.3,20.3)	16.9 (13.9,20.4)	15.8 (12.1,20.0)	15.0 (11.4,19.2)	15.0 (11.7,19.1)	14.4 (11.4,18.3)	-1.1 (-3.3,1.2)
	Both	22.3 (18.5,27.0)	22.0 (18.4,26.3)	21.7 (18.4,25.7)	21.5 (18.1,25.4)	20.2 (16.9,24.1)	21.9 (18.6,25.8)	21.3 (18.5,24.8)	21.4 (18.6,24.6)	20.8 (18.3,23.7)	21.1 (18.4,24.2)	20.1 (17.5,23.2)	20.2 (17.4,23.3)	20.0 (17.1,23.4)	18.6 (15.7,22.2)	18.1 (15.0,21.9)	18.0 (14.6,22.3)	17.2 (14.0,21.4)	-1.6 (-3.4,0.2)
Banks County, GA	Male	29.1 (25.1,33.3)	28.4 (24.5,32.7)	27.9 (24.0,32.3)	27.4 (23.5,31.8)	25.4 (21.6,30.0)	26.1 (22.2,30.6)	25.9 (22.6,29.7)	25.9 (22.6,29.6)	24.5 (21.5,27.8)	23.7 (20.5,27.5)	23.3 (20.3,26.7)	22.5 (19.3,25.9)	21.7 (18.7,25.1)	22.1 (18.5,25.9)	21.3 (16.8,26.4)	21.8 (18.1,25.9)	20.8 (17.2,24.9)	-2.1 (-3.5,-0.6)
	Female	22.9 (18.0,28.8)	22.7 (18.2,28.0)	22.6 (18.4,27.4)	22.7 (18.5,27.6)	21.7 (17.7,26.4)	22.8 (18.9,27.5)	22.1 (18.4,26.3)	22.5 (19.2,26.3)	21.9 (19.0,25.2)	22.8 (19.9,26.2)	22.5 (19.4,25.8)	23.1 (19.6,26.9)	21.6 (17.9,25.6)	20.2 (15.9,24.8)	18.3 (14.1,23.0)	17.9 (14.3,22.4)	17.3 (13.7,21.5)	-1.8 (-3.8,0.3)
	Both	25.9 (21.6,30.8)	25.5 (21.4,30.0)	25.2 (21.2,29.8)	25.0 (21.0,29.6)	23.5 (19.6,28.1)	24.4 (20.6,29.0)	24.0 (20.6,27.9)	24.2 (20.9,27.9)	23.2 (20.3,26.5)	23.3 (20.3,26.5)	22.9 (19.9,26.3)	22.8 (19.6,26.2)	21.7 (18.5,25.1)	21.1 (17.7,24.9)	19.8 (16.4,23.9)	19.8 (16.1,24.1)	19.0 (15.4,23.2)	-1.9 (-3.6,-0.3)
Barrow County, GA	Male	28.8 (25.1,33.0)	28.2 (24.6,32.4)	27.8 (24.0,32.1)	27.8 (24.1,32.0)	25.8 (22.2,30.0)	27.1 (23.3,31.6)	25.8 (22.5,29.3)	26.2 (23.1,29.7)	25.2 (22.3,28.3)	25.3 (22.0,28.7)	25.1 (22.3,28.2)	25.4 (22.5,28.5)	23.3 (20.6,26.3)	21.9 (18.9,25.1)	20.2 (16.0,24.3)	19.6 (16.3,23.2)	18.7 (15.5,22.2)	-2.7 (-4.2,-1.2)
	Female	23.2 (18.4,28.9)	23.0 (18.7,28.2)	22.9 (18.9,27.6)	23.0 (19.1,27.7)	21.6 (17.9,25.9)	22.1 (18.8,25.9)	22.8 (19.6,26.5)	22.9 (19.9,26.2)	22.3 (19.7,25.2)	21.9 (19.4,24.7)	21.7 (19.2,24.4)	20.6 (17.6,23.8)	18.2 (15.0,21.5)	16.3 (12.6,20.4)	15.8 (11.9,19.8)	16.2 (12.9,19.9)	15.6 (12.5,19.2)	-2.5 (-4.5,-0.5)
	Both	26.0 (21.8,30.9)	25.6 (21.7,30.0)	25.3 (21.5,29.8)	25.3 (21.6,29.8)	23.7 (20.0,27.9)	24.5 (21.0,28.5)	24.3 (21.1,27.8)	24.5 (21.5,28.0)	23.7 (20.9,26.8)	23.6 (20.8,26.5)	23.4 (20.7,26.2)	23.0 (20.2,25.8)	20.7 (17.8,23.7)	19.1 (16.1,22.3)	17.9 (14.9,21.4)	17.9 (14.6,21.6)	17.1 (14.0,20.7)	-2.6 (-4.3,-0.9)
Bartow County, GA	Male	27.8 (24.0,31.9)	27.2 (23.5,31.1)	26.8 (23.2,30.5)	26.6 (22.8,30.3)	24.7 (21.2,28.5)	25.8 (22.1,29.5)	25.1 (22.0,28.2)	24.4 (21.5,27.5)	23.3 (20.8,26.2)	22.8 (19.8,26.0)	22.5 (19.8,25.4)	22.5 (19.7,25.5)	22.9 (20.1,25.9)	22.3 (19.2,25.8)	21.7 (17.4,26.3)	20.8 (17.5,24.3)	19.9 (16.7,23.4)	-2.1 (-3.5,-0.7)
	Female	21.9 (17.1,27.6)	21.7 (17.4,26.7)	21.5 (17.5,26.2)	21.6 (17.8,25.9)	20.5 (17.0,24.4)	21.1 (18.0,24.4)	19.9 (17.1,22.8)	20.5 (18.0,23.3)	20.3 (18.1,22.7)	20.3 (17.9,22.8)	20.5 (17.9,23.1)	20.9 (17.4,24.2)	20.1 (16.3,23.7)	20.0 (15.3,24.5)	19.7 (15.1,24.2)	20.0 (16.3,24.0)	19.3 (15.8,23.1)	-0.8 (-2.9,1.1)
	Both	24.8 (20.6,29.6)	24.4 (20.5,28.9)	24.1 (20.4,28.3)	24.0 (20.3,28.0)	22.6 (19.0,26.4)	23.4 (20.0,26.9)	22.4 (19.5,25.5)	22.4 (19.7,25.3)	21.8 (19.4,24.4)	21.6 (19.1,24.2)	21.5 (18.9,24.2)	21.7 (18.8,24.4)	21.5 (18.4,24.5)	21.1 (17.9,24.4)	20.7 (17.5,24.1)	20.4 (16.9,24.1)	19.6 (16.2,23.3)	-1.5 (-3.2,0.2)
Ben Hill County, GA	Male	29.7 (25.8,33.7)	29.0 (25.2,32.9)	28.5 (24.7,32.5)	27.6 (24.0,31.5)	25.8 (22.2,29.7)	26.6 (22.9,30.7)	26.4 (23.2,29.8)	26.9 (23.7,30.2)	26.5 (23.4,29.5)	25.1 (21.7,28.5)	24.5 (21.4,27.6)	23.6 (20.6,26.8)	23.0 (20.0,26.2)	21.7 (18.1,25.4)	21.9 (17.0,26.6)	22.6 (18.8,26.7)	21.7 (17.7,25.8)	-2.0 (-3.5,-0.5)
	Female	21.1 (16.4,26.5)	20.9 (16.5,25.8)	20.8 (16.8,25.2)	21.1 (17.3,25.3)	19.5 (16.0,23.4)	19.8 (16.8,23.3)	19.8 (17.0,22.9)	19.8 (17.1,22.7)	19.8 (17.3,22.3)	20.0 (17.6,22.7)	20.6 (18.0,23.5)	19.9 (16.7,23.6)	20.0 (16.4,24.2)	19.1 (14.6,24.2)	20.0 (15.5,25.0)	20.1 (15.9,24.5)	19.3 (15.2,23.6)	-0.6 (-2.6,1.6)
	Both	25.3 (21.0,30.1)	24.9 (20.9,29.2)	24.5 (20.7,28.6)	24.3 (20.5,28.3)	22.6 (19.1,26.5)	23.2 (19.8,26.9)	23.0 (20.1,26.4)	23.3 (20.4,26.3)	23.1 (20.4,25.8)	22.5 (19.8,25.3)	22.5 (19.8,25.4)	21.7 (18.9,24.9)	21.5 (18.3,25.0)	20.4 (17.1,24.2)	20.9 (17.2,24.8)	21.3 (17.3,25.6)	20.5 (16.4,24.7)	-1.3 (-3.1,0.4)
Berrien County, GA	Male	29.3 (25.1,33.3)	28.6 (24.7,32.5)	28.2 (24.2,32.2)	27.0 (23.2,31.0)	26.1 (22.1,30.1)	27.6 (23.5,31.8)	26.9 (23.5,30.4)	26.7 (23.4,30.1)	25.7 (22.7,28.8)	24.6 (21.2,28.0)	23.8 (20.8,27.1)	23.8 (20.7,27.2)	23.3 (20.2,26.8)	23.2 (19.7,27.0)	22.4 (17.9,27.0)	21.3 (17.9,25.5)	20.4 (17.0,24.6)	-2.2 (-3.7,-0.8)
	Female	22.8 (17.7,28.8)	22.6 (17.8,27.9)	22.4 (18.0,27.3)	23.0 (18.7,27.4)	21.5 (17.5,26.0)	21.8 (18.0,25.9)	22.2 (18.7,25.8)	22.5 (19.2,25.8)	22.0 (19.2,25.0)	22.1 (19.3,25.1)	22.0 (19.1,25.2)	21.5 (18.1,25.3)	21.1 (17.2,25.3)	20.4 (15.6,25.6)	20.6 (15.8,25.9)	21.3 (17.4,26.4)	20.5 (16.7,25.4)	-0.7 (-2.6,1.4)
	Both	26.0 (21.2,31.1)	25.5 (21.2,30.1)	25.2 (21.1,29.4)	25.0 (20.9,29.1)	23.8 (19.7,27.9)	24.6 (20.8,28.7)	24.5 (21.0,28.0)	24.6 (21.4,27.9)	23.8 (20.9,26.8)	23.3 (20.4,26.3)	22.9 (20.0,26.0)	22.6 (19.6,26.0)	22.2 (19.0,25.9)	21.8 (18.4,25.7)	21.5 (17.8,25.6)	21.3 (17.6,25.9)	20.5 (16.8,25.0)	-1.5 (-3.2,0.2)
Bibb County, GA	Male	25.0 (21.8,28.7)	24.4 (21.3,28.2)	24.0 (20.9,27.9)	23.5 (20.4,27.2)	21.5 (18.4,25.2)	23.0 (19.8,27.0)	22.2 (19.5,25.5)	22.2 (19.5,25.4)	21.5 (19.1,24.5)	21.9 (19.1,25.2)	20.4 (17.9,23.2)	20.8 (18.1,23.7)	19.9 (17.3,22.8)	20.3 (17.3,23.7)	19.0 (15.0,23.1)	19.6 (16.4,23.4)	18.8 (15.6,22.6)	-1.8 (-3.2,-0.4)
	Female	16.2 (13.0,20.2)	16.0 (13.2,19.8)	15.9 (13.3,19.3)	16.7 (14.1,20.1)	16.0 (13.4,19.3)	16.5 (14.0,19.6)	16.7 (14.5,19.5)	17.6 (15.5,20.5)	17.4 (15.4,19.9)	16.8 (14.9,19.1)	16.8 (14.7,19.1)	16.0 (13.6,18.9)	16.4 (13.6,19.5)	15.5 (12.3,19.1)	15.3 (12.2,18.9)	14.0 (11.3,17.4)	13.5 (10.8,16.6)	-1.2 (-3.1,0.8)
	Both	20.5 (17.5,24.5)	20.2 (17.3,23.8)	19.9 (17.1,23.4)	20.1 (17.2,23.6)	18.7 (15.8,22.2)	19.7 (16.9,23.1)	19.4 (16.9,22.5)	19.9 (17.5,22.9)	19.4 (17.2,22.1)	19.3 (17.1,22.0)	18.5 (16.4,20.9)	18.3 (16.1,20.8)	18.1 (15.6,21.0)	17.8 (15.2,21.0)	17.1 (14.3,20.6)	16.8 (13.8,20.4)	16.1 (13.2,19.6)	-1.5 (-3.1,0.1)
Bleckley County, GA	Male	27.1 (23.3,31.5)	26.5 (22.7,30.6)	26.1 (22.3,30.1)	25.9 (22.2,30.1)	24.3 (20.6,28.4)	26.8 (22.8,31.1)	26.3 (23.0,29.9)	25.5 (22.3,28.9)	25.6 (22.6,28.7)	25.5 (22.1,29.0)	24.1 (21.2,27.2)	23.9 (20.9,27.1)	25.4 (22.3,28.8)	22.9 (19.6,26.7)	20.8 (16.4,25.7)	21.1 (17.7,25.0)	20.2 (16.9,24.1)	-1.8 (-3.3,-0.4)
	Female	22.0 (17.1,28.2)	21.8 (17.3,27.3)	21.6 (17.3,26.6)	21.5 (17.5,26.1)	19.9 (16.2,23.9)	21.0 (17.7,24.9)	20.9 (17.8,24.4)	22.3 (19.3,25.6)	22.0 (19.4,24.8)	21.6 (19.2,24.4)	21.0 (18.4,23.9)	21.0 (17.8,24.5)	20.7 (17.1,24.4)	18.5 (14.1,22.9)	17.8 (13.7,22.1)	17.8 (14.2,22.0)	17.1 (13.7,21.2)	-1.6 (-3.6,0.5)
	Both	24.5 (20.3,29.8)	24.1 (20.0,28.9)	23.8 (19.8,28.3)	23.7 (19.7,28.1)	22.1 (18.4,26.1)	23.9 (20.3,27.8)	23.6 (20.3,27.0)	23.9 (20.8,27.2)	23.7 (20.9,26.7)	23.5 (20.7,26.3)	22.6 (19.9,25.6)	22.4 (19.7,25.5)	23.0 (20.0,26.5)	20.6 (17.5,24.2)	19.3 (16.1,23.1)	19.4 (16.0,23.5)	18.7 (15.2,22.7)	-1.7 (-3.4,0.0)
Brantley County, GA	Male	28.8 (24.8,32.8)	28.2 (24.2,32.1)	27.7 (23.8,31.6)	27.1 (23.1,30.9)	25.2 (21.4,29.0)	26.6 (22.6,30.5)	26.4 (23.0,29.8)	26.7 (23.4,30.0)	26.5 (23.5,29.7)	26.0 (22.5,29.6)	25.6 (22.4,29.1)	25.2 (21.7,28.9)	25.5 (22.0,29.4)	24.7 (21.0,29.1)	25.0 (19.9,30.4)	24.9 (20.7,29.5)	23.9 (19.8,28.6)	-1.2 (-2.5,0.2)
	Female	24.0 (18.8,29.9)	23.9 (19.1,29.2)	23.8 (19.3,28.5)	24.2 (19.7,28.8)	23.5 (19.4,27.7)	24.8 (21.1,28.5)	24.1 (20.7,27.6)	23.6 (20.6,26.9)	23.6 (20.8,26.5)	23.5 (20.6,26.8)	23.4 (20.3,26.9)	23.2 (19.6,27.4)	23.6 (19.7,28.4)	23.6 (18.7,29.4)	22.6 (17.7,28.4)	23.6 (18.9,29.0)	22.8 (18.2,28.0)	-0.3 (-2.2,1.7)
	Both	26.3 (21.8,31.1)	26.0 (21.6,30.4)	25.7 (21.5,30.1)	25.6 (21.4,29.8)	24.3 (20.4,28.3)	25.7 (22.0,29.5)	25.3 (21.9,28.7)	25.1 (22.1,28.3)	25.0 (22.1,28.1)	24.7 (21.7,27.9)	24.5 (21.3,27.9)	24.2 (20.8,27.9)	24.5 (20.9,28.8)	24.2 (20.5,28.7)	23.8 (19.7,28.6)	24.2 (19.8,29.3)	23.3 (19.0,28.3)	-0.8 (-2.3,0.9)
Brooks County, GA	Male	27.1 (22.8,31.4)	26.6 (22.5,30.9)	26.1 (22.1,30.3)	25.2 (21.3,29.5)	23.7 (19.9,28.2)	24.4 (20.4,28.7)	23.6 (20.3,27.3)	23.1 (20.0,26.7)	23.4 (20.6,26.8)	23.2 (19.9,26.9)	22.8 (19.9,25.9)	22.1 (19.2,25.3)	22.3 (19.3,25.7)	22.0 (18.5,25.8)	22.4 (17.8,27.3)	21.9 (18.2,25.9)	21.0 (17.4,24.8)	-1.6 (-3.1,-0.1)
	Female	20.4 (15.2,25.7)	20.3 (15.5,25.2)	20.2 (15.7,24.8)	20.9 (16.7,25.5)	19.3 (15.6,23.6)	20.0 (16.7,24.1)	19.3 (16.3,23.0)	17.9 (15.4,21.1)	16.7 (14.4,19.3)	16.8 (14.6,19.2)	16.3 (14.0,19.0)	16.5 (13.7,19.7)	17.4 (14.3,21.1)	18.4 (14.4,22.9)	19.3 (15.4,23.9)	17.0 (13.5,21.1)	16.3 (13.1,20.3)	-1.4 (-3.5,0.8)
	Both	23.7 (19.1,28.5)	23.4 (19.0,27.9)	23.1 (18.9,27.5)	23.0 (18.9,27.4)	21.4 (17.8,25.8)	22.2 (18.6,26.4)	21.4 (18.4,25.0)	20.5 (17.7,23.8)	20.0 (17.5,23.0)	19.9 (17.4,22.8)	19.5 (17.0,22.2)	19.3 (16.6,22.3)	19.8 (16.9,23.1)	20.2 (17.0,23.7)	20.8 (17.4,24.8)	19.4 (15.9,23.5)	18.6 (15.2,22.5)	-1.5 (-3.2,0.3)
Bryan County, GA	Male	25.5 (21.9,29.4)	24.9 (21.4,28.6)	24.5 (21.0,28.2)	24.7 (21.2,28.5)	23.2 (19.8,26.9)	24.9 (21.3,28.7)	24.1 (21.2,27.3)	23.4 (20.5,26.6)	21.1 (18.6,23.8)	20.5 (17.9,23.6)	18.9 (16.5,21.6)	17.7 (15.2,20.3)	17.3 (14.9,19.9)	16.7 (14.1,19.7)	15.7 (12.5,19.6)	15.3 (12.4,18.6)	14.5 (11.7,17.7)	-3.5 (-5.2,-2.0)
	Female	19.1 (14.7,24.6)	19.0 (15.1,23.7)	18.9 (15.3,23.2)	19.7 (16.0,23.9)	18.5 (15.1,22.2)	18.4 (15.4,21.8)	17.8 (15.1,20.9)	18.0 (15.6,20.8)	17.3 (15.1,19.8)	17.8 (15.5,20.2)	17.4 (15.0,19.9)	16.5 (13.6,19.5)	15.3 (12.2,18.5)	15.2 (11.4,19.2)	13.7 (10.0,17.5)	13.9 (10.7,17.7)	13.2 (10.2,16.8)	-2.3 (-4.6,-0.1)
	Both	22.2 (18.4,26.7)	21.9 (18.2,26.1)	21.7 (18.1,25.6)	22.1 (18.5,26.1)	20.8 (17.4,24.4)	21.6 (18.4,25.2)	20.9 (18.1,24.1)	20.7 (18.0,23.6)	19.2 (16.9,21.8)	19.1 (16.7,21.8)	18.2 (15.7,20.7)	17.1 (14.6,19.5)	16.3 (13.5,18.9)	15.9 (13.1,18.8)	14.7 (11.8,17.9)	14.6 (11.5,18.1)	13.9 (10.9,17.2)	-3.0 (-4.9,-1.1)
Bulloch County, GA	Male	23.0 (19.7,26.7)	22.5 (19.2,26.2)	22.2 (18.8,25.8)	21.7 (18.4,25.3)	20.0 (16.9,23.5)	21.4 (18.1,25.0)	20.5 (17.7,23.4)	20.4 (17.7,23.1)	19.8 (17.3,22.3)	19.8 (17.0,22.7)	18.7 (16.3,21.3)	18.0 (15.6,20.7)	18.1 (15.7,20.7)	17.1 (14.3,20.1)	16.5 (12.7,20.4)	16.5 (13.5,19.6)	15.7 (12.9,18.8)	-2.4 (-4.0,-0.9)
	Female	15.2 (11.5,19.4)	15.1 (11.8,18.9)	15.0 (11.9,18.5)	15.0 (12.1,18.4)	14.5 (11.7,17.7)	14.4 (11.9,17.1)	14.4 (12.2,16.7)	14.5 (12.5,16.6)	14.0 (12.3,16.0)	14.7 (12.9,16.7)	15.4 (13.4,17.5)	16.3 (13.9,18.9)	15.6 (13.0,18.5)	14.9 (11.7,18.3)	14.3 (11.3,17.7)	13.5 (10.6,16.6)	12.9 (10.2,15.9)	-1.0 (-3.0,1.1)
	Both	19.0 (15.5,23.0)	18.7 (15.5,22.3)	18.5 (15.4,22.1)	18.3 (15.2,21.8)	17.2 (14.2,20.5)	17.8 (15.0,20.9)	17.4 (15.0,20.0)	17.4 (15.1,19.7)	16.9 (14.8,19.0)	17.2 (15.0,19.5)	17.0 (14.8,19.3)	17.1 (14.9,19.5)	16.9 (14.5,19.5)	16.0 (13.5,18.7)	15.4 (12.8,18.3)	15.0 (12.0,18.1)	14.3 (11.5,17.3)	-1.8 (-3.5,-0.1)
Burke County, GA	Male	27.9 (24.1,32.1)	27.4 (23.6,31.2)	27.0 (23.1,31.0)	25.9 (22.2,29.8)	24.3 (20.6,28.4)	26.5 (22.6,30.7)	26.3 (22.8,29.9)	26.6 (23.2,30.1)	26.4 (23.2,29.7)	26.1 (22.5,29.8)	25.3 (22.0,28.6)	24.4 (21.1,27.7)	24.2 (20.8,27.5)	22.8 (18.8,26.5)	23.0 (17.7,28.2)	23.1 (18.9,27.4)	22.2 (18.1,26.3)	-1.4 (-2.9,-0.1)
	Female	17.2 (13.0,22.0)	17.1 (13.3,21.4)	17.1 (13.5,21.1)	18.3 (14.6,22.2)	17.4 (14.0,21.2)	18.3 (15.1,21.7)	18.2 (15.3,21.3)	19.0 (16.2,21.9)	18.6 (16.1,21.1)	19.1 (16.7,21.6)	18.8 (16.2,21.4)	18.9 (15.9,22.1)	18.0 (14.6,21.3)	17.1 (13.0,21.1)	16.7 (12.5,20.8)	17.2 (13.3,21.4)	16.6 (13.0,20.6)	-0.2 (-2.4,1.9)
	Both	22.5 (18.5,26.8)	22.2 (18.4,26.4)	21.9 (18.3,25.7)	22.0 (18.4,25.9)	20.8 (17.2,24.8)	22.3 (18.8,26.1)	22.1 (19.0,25.5)	22.7 (19.7,25.9)	22.4 (19.6,25.3)	22.6 (19.6,25.5)	22.0 (19.1,24.8)	21.6 (18.6,24.7)	21.0 (17.8,24.2)	19.9 (16.5,23.4)	19.8 (16.1,23.5)	20.1 (16.0,24.3)	19.4 (15.5,23.4)	-0.9 (-2.7,0.6)
Butts County, GA	Male	29.5 (25.4,33.9)	28.9 (24.9,33.2)	28.5 (24.5,32.6)	28.0 (24.0,32.2)	26.2 (21.9,30.4)	27.8 (23.5,32.1)	27.4 (23.8,31.1)	27.8 (24.2,31.4)	26.4 (23.1,29.7)	25.8 (22.3,29.6)	24.7 (21.6,28.1)	24.8 (21.6,28.2)	23.7 (20.5,27.2)	23.9 (20.2,27.9)	23.0 (18.4,28.2)	23.4 (19.6,27.8)	22.4 (18.6,26.6)	-1.7 (-3.1,-0.3)
	Female	22.0 (16.9,27.8)	21.8 (17.2,27.3)	21.7 (17.3,26.5)	22.2 (17.9,26.7)	20.8 (16.7,25.1)	20.7 (16.9,24.5)	20.6 (17.1,24.3)	21.1 (17.7,24.5)	20.7 (17.8,23.8)	21.1 (18.3,24.1)	21.9 (19.0,25.1)	22.1 (18.6,25.7)	20.7 (16.8,24.9)	20.2 (15.6,25.3)	19.3 (14.8,24.4)	18.4 (14.6,22.8)	17.7 (14.1,21.8)	-1.4 (-3.5,0.8)
	Both	25.7 (21.1,30.8)	25.3 (21.0,29.9)	25.1 (20.9,29.5)	25.1 (20.9,29.4)	23.5 (19.3,27.7)	24.2 (20.2,28.2)	23.9 (20.3,27.7)	24.4 (21.0,27.8)	23.5 (20.4,26.6)	23.4 (20.4,26.7)	23.3 (20.3,26.5)	23.4 (20.2,26.7)	22.2 (18.7,25.7)	22.0 (18.4,26.0)	21.1 (17.6,25.0)	20.9 (17.1,25.3)	20.0 (16.3,24.2)	-1.6 (-3.2,0.2)
Calhoun County, GA	Male	26.7 (22.9,31.0)	26.1 (22.4,30.3)	25.5 (22.0,29.6)	24.1 (20.6,28.2)	22.3 (19.0,26.1)	23.8 (20.3,27.9)	24.0 (21.0,27.4)	24.7 (21.7,28.3)	24.6 (21.7,27.7)	24.7 (21.4,28.5)	24.3 (21.0,27.5)	23.5 (20.1,26.9)	24.1 (20.6,27.5)	23.1 (19.1,27.1)	21.9 (16.8,27.4)	22.3 (18.1,26.6)	21.4 (17.2,25.5)	-1.4 (-3.0,0.1)
	Female	16.6 (12.7,21.9)	16.4 (12.8,21.1)	16.4 (13.1,20.6)	17.4 (14.1,21.6)	16.7 (13.6,20.6)	17.5 (14.4,21.1)	16.8 (14.1,20.1)	16.2 (13.7,19.2)	16.0 (13.7,18.4)	15.5 (13.3,17.9)	15.6 (13.3,18.1)	16.0 (13.1,19.0)	16.4 (13.2,19.8)	15.1 (11.4,19.1)	14.1 (10.4,17.9)	13.8 (10.4,17.4)	13.2 (10.0,16.7)	-1.4 (-3.8,0.8)
	Both	21.6 (17.8,26.2)	21.2 (17.7,25.5)	20.9 (17.5,25.0)	20.7 (17.3,24.9)	19.4 (16.2,23.3)	20.6 (17.5,24.3)	20.4 (17.5,23.7)	20.4 (17.7,23.6)	20.2 (17.5,23.0)	20.0 (17.3,22.9)	19.9 (17.1,22.7)	19.7 (16.7,22.6)	20.2 (17.0,23.5)	19.1 (15.8,22.5)	17.9 (14.4,21.6)	18.0 (14.2,21.9)	17.2 (13.5,21.0)	-1.4 (-3.3,0.4)
Camden County, GA	Male	25.6 (22.1,29.3)	25.0 (21.6,28.6)	24.7 (21.2,28.4)	24.4 (21.1,27.9)	23.1 (19.5,26.7)	24.4 (20.9,28.1)	22.8 (19.9,25.9)	22.3 (19.4,25.2)	21.8 (19.2,24.4)	21.5 (18.7,24.6)	20.4 (17.8,22.9)	20.5 (17.9,23.2)	20.4 (17.9,23.3)	19.1 (16.2,22.1)	19.2 (15.1,23.2)	18.5 (15.4,22.0)	17.6 (14.7,21.1)	-2.3 (-3.8,-0.9)
	Female	20.6 (16.1,25.5)	20.4 (16.4,24.8)	20.2 (16.6,24.1)	19.9 (16.4,23.7)	18.5 (15.1,22.1)	18.4 (15.5,21.6)	17.1 (14.6,19.7)	17.2 (14.9,19.6)	16.5 (14.5,18.6)	16.7 (14.7,18.9)	17.1 (14.9,19.5)	17.5 (14.9,20.6)	16.7 (13.9,20.2)	16.5 (12.9,20.6)	17.0 (13.5,21.3)	16.9 (13.7,20.6)	16.3 (13.2,19.8)	-1.5 (-3.3,0.5)
	Both	23.1 (19.2,27.4)	22.7 (19.1,26.5)	22.4 (18.8,26.1)	22.1 (18.7,25.7)	20.7 (17.3,24.4)	21.4 (18.1,24.8)	19.9 (17.2,22.7)	19.7 (17.2,22.2)	19.1 (16.8,21.4)	19.1 (16.8,21.5)	18.7 (16.4,21.1)	19.0 (16.6,21.7)	18.5 (16.0,21.6)	17.8 (15.1,21.0)	18.1 (15.2,21.4)	17.7 (14.6,21.2)	16.9 (14.0,20.4)	-1.9 (-3.5,-0.2)
Candler County, GA	Male	29.5 (25.6,33.8)	28.8 (25.0,33.0)	28.0 (24.2,32.2)	26.8 (23.2,31.1)	24.8 (21.2,28.9)	26.4 (22.7,30.8)	25.5 (22.4,29.1)	25.2 (22.2,28.6)	24.3 (21.7,27.3)	24.0 (21.0,27.6)	22.9 (20.1,26.0)	22.3 (19.5,25.4)	20.6 (17.8,23.7)	19.6 (16.5,23.2)	19.3 (15.0,23.9)	19.4 (16.2,23.1)	18.6 (15.5,22.2)	-2.9 (-4.4,-1.4)
	Female	20.8 (16.0,26.6)	20.5 (16.3,25.7)	20.3 (16.4,24.9)	20.3 (16.5,24.9)	19.6 (16.0,24.0)	19.8 (16.7,23.6)	20.0 (17.1,23.6)	21.3 (18.5,24.7)	20.7 (18.2,23.7)	21.1 (18.3,23.9)	21.5 (18.7,24.5)	21.5 (18.0,25.1)	18.9 (15.2,22.7)	17.6 (13.2,22.2)	16.3 (12.0,20.8)	16.7 (13.3,20.9)	16.1 (12.8,20.1)	-1.6 (-3.8,0.6)
	Both	25.0 (20.8,30.0)	24.6 (20.7,29.0)	24.1 (20.3,28.5)	23.5 (19.7,27.9)	22.2 (18.6,26.5)	23.1 (19.7,27.1)	22.7 (19.6,26.2)	23.2 (20.4,26.6)	22.5 (19.9,25.5)	22.5 (19.9,25.6)	22.2 (19.4,25.2)	21.9 (19.0,25.1)	19.7 (16.6,23.0)	18.6 (15.3,22.0)	17.8 (14.8,21.5)	18.0 (14.8,22.0)	17.3 (14.1,21.1)	-2.3 (-4.1,-0.6)
Carroll County, GA	Male	26.7 (23.2,30.9)	26.1 (22.7,30.0)	25.7 (22.2,29.7)	25.2 (21.8,29.1)	22.7 (19.6,26.4)	23.0 (19.7,26.7)	22.9 (20.1,26.0)	22.5 (19.9,25.5)	21.4 (18.9,24.1)	20.9 (18.2,24.0)	21.3 (18.8,24.3)	21.5 (18.9,24.6)	21.1 (18.4,24.1)	21.8 (18.9,25.2)	21.7 (18.1,26.0)	20.9 (17.5,24.6)	20.0 (16.7,23.7)	-1.8 (-3.3,-0.4)
	Female	21.2 (17.0,26.3)	21.0 (17.2,25.8)	20.9 (17.3,25.2)	21.6 (18.0,25.8)	20.4 (17.0,24.3)	20.7 (17.7,24.2)	20.2 (17.4,23.4)	20.2 (17.5,23.1)	19.8 (17.5,22.5)	19.5 (17.1,22.1)	19.3 (17.0,22.0)	18.4 (15.4,21.5)	17.5 (14.2,20.8)	17.4 (13.5,21.4)	16.9 (12.8,21.0)	17.8 (14.4,21.7)	17.1 (14.0,20.8)	-1.3 (-3.3,0.4)
	Both	23.9 (20.2,28.4)	23.5 (19.9,27.7)	23.2 (19.8,27.3)	23.3 (19.8,27.4)	21.5 (18.3,25.4)	21.9 (18.8,25.4)	21.5 (18.7,24.6)	21.3 (18.6,24.3)	20.6 (18.2,23.3)	20.2 (17.9,22.9)	20.3 (17.9,23.1)	19.9 (17.4,22.9)	19.3 (16.5,22.5)	19.5 (16.5,23.0)	19.3 (16.3,22.7)	19.3 (16.0,23.1)	18.5 (15.3,22.2)	-1.6 (-3.3,-0.1)
Catoosa County, GA	Male	29.9 (26.0,34.1)	29.2 (25.5,33.3)	28.7 (25.1,32.7)	28.5 (24.9,32.5)	26.3 (22.8,30.2)	27.6 (23.9,31.7)	26.2 (23.1,29.8)	26.0 (23.1,29.4)	25.9 (23.2,29.0)	25.8 (22.7,29.4)	24.5 (21.7,27.8)	25.0 (22.0,28.5)	23.6 (20.5,27.1)	22.0 (18.8,25.8)	21.1 (16.9,25.8)	20.8 (17.2,24.7)	19.9 (16.5,23.9)	-2.5 (-3.9,-1.2)
	Female	24.4 (19.6,30.5)	24.1 (19.9,29.5)	23.9 (19.9,28.7)	23.1 (19.4,27.6)	21.2 (17.7,25.3)	21.2 (18.1,24.8)	21.0 (18.1,24.3)	20.9 (18.2,24.1)	19.5 (17.2,22.2)	19.7 (17.3,22.7)	19.6 (17.0,22.7)	19.5 (16.2,23.1)	18.0 (14.6,21.9)	18.1 (14.1,22.9)	17.8 (13.8,22.4)	19.2 (15.3,23.6)	18.5 (14.8,22.6)	-1.7 (-3.6,0.2)
	Both	27.1 (23.0,32.2)	26.6 (22.7,31.2)	26.3 (22.6,30.6)	25.7 (22.0,29.9)	23.7 (20.2,27.7)	24.4 (21.0,28.2)	23.5 (20.6,26.9)	23.4 (20.7,26.6)	22.6 (20.2,25.6)	22.7 (20.1,25.9)	22.0 (19.3,25.1)	22.2 (19.3,25.5)	20.8 (17.6,24.2)	20.1 (16.7,23.7)	19.4 (16.0,23.2)	20.0 (16.2,24.1)	19.2 (15.6,23.2)	-2.1 (-3.7,-0.6)
Charlton County, GA	Male	29.6 (25.6,34.0)	29.1 (25.3,33.4)	28.9 (25.1,33.2)	28.5 (24.7,32.9)	26.9 (23.1,31.2)	29.3 (25.3,33.9)	27.7 (24.3,31.4)	27.9 (24.4,31.6)	27.8 (24.5,31.3)	27.6 (23.8,31.4)	27.1 (23.6,30.8)	27.2 (23.6,31.0)	27.7 (24.0,31.4)	26.9 (22.7,31.1)	25.0 (19.8,30.4)	24.7 (20.6,28.9)	23.7 (19.7,27.8)	-1.4 (-2.8,0.0)
	Female	24.4 (18.9,30.7)	24.5 (19.5,30.2)	24.6 (20.0,29.9)	24.9 (20.5,30.1)	23.0 (18.9,27.8)	23.3 (19.4,27.6)	22.0 (18.5,25.8)	21.3 (18.0,24.7)	20.7 (17.9,23.7)	21.6 (18.6,24.6)	22.1 (18.9,25.4)	22.1 (18.2,26.1)	21.4 (17.1,25.7)	20.7 (15.6,25.8)	20.3 (15.2,25.4)	20.9 (16.6,25.5)	20.3 (16.1,24.7)	-1.2 (-3.3,0.9)
	Both	27.0 (22.4,32.2)	26.7 (22.4,31.6)	26.7 (22.6,31.5)	26.7 (22.6,31.4)	24.9 (20.9,29.4)	26.2 (22.5,30.5)	24.8 (21.3,28.5)	24.5 (21.2,28.0)	24.2 (21.1,27.4)	24.5 (21.4,27.8)	24.6 (21.3,27.9)	24.6 (21.2,28.1)	24.5 (20.7,28.2)	23.7 (19.9,27.7)	22.6 (18.6,26.7)	22.8 (18.6,27.2)	22.0 (17.9,26.2)	-1.3 (-3.0,0.3)
Chatham County, GA	Male	24.3 (21.0,27.4)	23.7 (20.5,26.7)	23.2 (20.1,26.2)	23.6 (20.6,26.7)	22.1 (19.1,25.1)	23.6 (20.4,26.5)	23.7 (21.0,26.3)	23.2 (20.6,25.7)	21.3 (18.9,23.7)	20.5 (17.9,23.1)	19.3 (17.1,21.7)	18.1 (15.7,20.5)	18.0 (15.6,20.5)	17.6 (14.8,20.4)	17.5 (13.5,21.1)	17.5 (14.6,20.7)	16.7 (13.9,20.0)	-2.3 (-3.7,-0.9)
	Female	17.1 (13.8,20.7)	16.9 (13.8,20.0)	16.7 (13.9,19.5)	17.6 (14.8,20.4)	16.8 (14.4,19.4)	17.3 (15.2,19.4)	17.0 (15.1,18.8)	17.5 (15.8,19.3)	16.6 (15.0,18.3)	16.5 (15.0,18.3)	16.8 (15.1,18.7)	15.8 (13.8,18.2)	14.9 (12.7,17.6)	14.2 (11.5,17.4)	13.5 (10.8,16.7)	12.5 (10.0,15.3)	12.0 (9.7,14.7)	-2.2 (-3.9,-0.3)
	Both	20.6 (17.3,23.9)	20.2 (17.2,23.2)	19.9 (17.0,22.8)	20.6 (17.7,23.5)	19.4 (16.6,22.1)	20.4 (17.8,22.9)	20.3 (18.0,22.5)	20.3 (18.2,22.4)	18.9 (16.9,21.0)	18.5 (16.5,20.5)	18.0 (16.1,20.2)	16.9 (15.0,19.1)	16.5 (14.3,18.8)	15.9 (13.6,18.4)	15.5 (12.9,18.2)	14.9 (12.3,17.9)	14.3 (11.7,17.3)	-2.3 (-3.7,-0.7)
Chattahoochee County, GA	Male	21.1 (17.8,24.4)	20.4 (17.4,23.7)	20.0 (16.9,23.3)	19.2 (16.1,22.5)	17.7 (14.8,21.0)	17.2 (14.3,20.5)	16.0 (13.6,18.7)	16.0 (13.7,18.6)	15.8 (13.7,18.3)	15.3 (12.9,17.9)	14.9 (12.8,17.3)	14.3 (12.2,16.7)	13.8 (11.6,16.2)	14.4 (12.0,17.2)	14.4 (11.2,18.0)	14.7 (12.0,17.7)	14.1 (11.4,17.0)	-2.5 (-4.2,-0.9)
	Female	15.4 (11.8,19.8)	15.2 (11.9,19.3)	15.1 (11.9,18.7)	15.0 (11.9,18.5)	14.4 (11.4,17.7)	15.1 (12.3,18.5)	14.3 (11.8,17.3)	13.6 (11.4,16.1)	13.1 (11.2,15.3)	13.5 (11.6,15.8)	13.3 (11.2,15.6)	13.1 (10.6,15.7)	12.6 (9.9,15.4)	13.1 (9.8,16.6)	12.2 (9.0,15.7)	12.4 (9.5,15.7)	11.8 (9.1,14.9)	-1.7 (-3.9,0.6)
	Both	18.2 (14.9,22.2)	17.8 (14.6,21.3)	17.5 (14.3,20.9)	17.0 (13.9,20.4)	16.0 (13.1,19.3)	16.1 (13.2,19.4)	15.1 (12.7,18.0)	14.8 (12.6,17.3)	14.5 (12.5,16.8)	14.4 (12.4,16.6)	14.1 (12.1,16.5)	13.7 (11.5,16.0)	13.2 (10.8,15.6)	13.7 (11.1,16.4)	13.3 (10.6,16.2)	13.5 (10.7,16.7)	12.9 (10.2,15.9)	-2.1 (-4.1,-0.3)
Chattooga County, GA	Male	30.9 (26.5,34.9)	30.2 (26.0,34.2)	29.7 (25.6,33.8)	29.3 (25.2,33.3)	27.2 (23.1,31.4)	29.1 (24.7,33.3)	28.5 (24.8,32.2)	28.9 (25.2,32.6)	27.3 (23.9,30.6)	26.9 (23.1,30.8)	26.7 (23.4,30.4)	26.6 (23.1,30.3)	27.0 (23.4,30.8)	27.4 (23.3,31.7)	27.3 (21.7,33.0)	26.0 (22.0,30.7)	25.0 (20.9,29.6)	-1.3 (-2.6,0.2)
	Female	24.9 (19.3,30.1)	24.8 (19.8,29.8)	24.8 (20.0,29.4)	23.8 (19.3,28.3)	22.7 (18.5,27.0)	23.6 (19.7,27.8)	23.6 (19.9,27.6)	24.0 (20.4,27.6)	23.5 (20.3,26.7)	23.0 (20.0,26.3)	22.3 (19.4,25.6)	22.1 (18.9,26.1)	20.6 (17.1,25.0)	20.5 (16.2,25.9)	20.0 (15.8,25.5)	20.5 (16.6,25.4)	19.8 (16.0,24.4)	-1.4 (-3.2,0.7)
	Both	27.8 (23.1,32.4)	27.5 (22.8,31.8)	27.2 (22.8,31.4)	26.5 (22.2,30.8)	24.9 (20.8,29.2)	26.3 (22.1,30.4)	26.0 (22.3,29.9)	26.4 (22.7,30.0)	25.3 (22.2,28.6)	25.0 (21.8,28.3)	24.5 (21.4,27.8)	24.3 (21.1,27.9)	23.7 (20.5,27.6)	23.9 (20.4,28.1)	23.6 (19.7,28.0)	23.2 (19.2,27.9)	22.3 (18.4,26.9)	-1.4 (-2.8,0.4)
Cherokee County, GA	Male	23.0 (19.9,26.4)	22.4 (19.5,25.7)	21.9 (19.1,25.2)	20.7 (18.0,23.9)	18.9 (16.3,22.3)	19.3 (16.8,22.6)	18.7 (16.4,21.4)	18.3 (16.1,20.9)	17.8 (15.8,20.1)	17.3 (15.2,20.0)	17.3 (15.3,19.8)	17.5 (15.5,20.0)	16.5 (14.6,18.9)	16.0 (13.9,18.8)	15.6 (12.7,19.3)	14.8 (12.5,17.8)	14.1 (11.9,17.0)	-3.1 (-4.5,-1.6)
	Female	18.0 (14.2,22.3)	17.8 (14.4,21.6)	17.7 (14.5,21.3)	18.1 (15.1,21.6)	17.4 (14.7,20.7)	17.6 (15.2,20.7)	17.0 (14.9,19.7)	16.9 (14.9,19.3)	16.0 (14.2,18.0)	15.7 (14.0,17.7)	16.0 (14.3,18.0)	14.6 (12.5,17.1)	13.7 (11.4,16.3)	14.0 (11.2,17.1)	13.0 (10.3,16.3)	13.0 (10.7,16.0)	12.5 (10.3,15.4)	-2.3 (-4.1,-0.3)
	Both	20.4 (17.1,24.3)	20.1 (16.9,23.6)	19.8 (16.8,23.2)	19.4 (16.6,22.8)	18.1 (15.5,21.4)	18.5 (16.1,21.6)	17.8 (15.6,20.5)	17.6 (15.5,20.0)	16.9 (15.0,19.1)	16.5 (14.6,18.7)	16.6 (14.8,18.8)	16.0 (14.2,18.3)	15.1 (13.1,17.5)	15.0 (12.9,17.6)	14.3 (12.2,17.1)	13.9 (11.6,16.9)	13.3 (11.1,16.2)	-2.7 (-4.3,-1.0)
Clarke County, GA	Male	18.4 (15.8,21.4)	18.0 (15.4,20.8)	17.6 (15.1,20.5)	18.4 (15.8,21.3)	17.0 (14.7,20.0)	17.2 (14.7,20.1)	16.4 (14.3,18.9)	16.3 (14.4,18.7)	15.3 (13.5,17.4)	14.3 (12.4,16.8)	14.1 (12.3,16.3)	14.4 (12.4,16.7)	14.2 (12.2,16.4)	14.1 (11.8,16.6)	13.4 (10.3,16.9)	13.4 (10.9,16.3)	12.8 (10.4,15.5)	-2.3 (-4.0,-0.6)
	Female	14.2 (11.0,18.0)	14.0 (11.1,17.4)	13.8 (11.2,16.8)	12.8 (10.4,15.7)	12.8 (10.6,15.6)	13.3 (11.4,15.7)	12.9 (11.1,15.2)	13.2 (11.5,15.2)	12.9 (11.4,14.8)	12.4 (10.9,14.2)	11.7 (10.1,13.5)	11.5 (9.5,13.6)	10.9 (8.7,13.3)	10.4 (7.8,13.4)	9.7 (7.1,12.6)	9.6 (7.4,12.2)	9.3 (7.3,11.7)	-2.7 (-4.9,-0.3)
	Both	16.3 (13.4,19.6)	15.9 (13.3,19.0)	15.7 (13.1,18.6)	15.6 (13.1,18.4)	14.9 (12.6,17.8)	15.2 (13.1,17.9)	14.6 (12.8,17.0)	14.7 (12.9,16.9)	14.1 (12.5,16.0)	13.3 (11.8,15.3)	12.9 (11.2,14.8)	12.9 (11.1,14.9)	12.5 (10.6,14.7)	12.2 (10.2,14.7)	11.5 (9.4,14.1)	11.5 (9.2,14.3)	11.0 (8.8,13.5)	-2.4 (-4.5,-0.5)
Clay County, GA	Male	26.4 (22.4,30.7)	26.0 (22.2,30.1)	25.6 (21.8,29.6)	24.5 (20.8,28.5)	23.0 (19.3,27.0)	25.3 (21.4,29.4)	25.0 (21.6,28.6)	24.9 (21.7,28.4)	24.3 (21.3,27.6)	23.4 (20.0,27.1)	22.2 (19.2,25.4)	21.6 (18.6,25.1)	23.6 (20.5,27.2)	22.9 (19.2,27.0)	23.0 (18.1,28.1)	22.8 (19.0,26.8)	21.9 (18.2,25.8)	-1.2 (-2.8,0.3)
	Female	17.3 (13.1,22.2)	17.2 (13.2,21.5)	17.1 (13.4,21.2)	17.8 (14.3,22.1)	17.1 (13.7,21.0)	17.5 (14.3,21.0)	17.0 (14.1,20.3)	16.9 (14.2,19.9)	16.4 (14.1,19.0)	15.6 (13.4,18.1)	15.8 (13.5,18.4)	15.6 (12.6,18.8)	16.2 (12.8,19.7)	15.5 (11.3,19.8)	15.8 (11.6,20.0)	15.9 (12.5,19.8)	15.3 (12.0,19.0)	-0.8 (-3.1,1.5)
	Both	21.8 (17.7,26.2)	21.5 (17.7,25.7)	21.2 (17.6,25.4)	21.1 (17.5,25.3)	20.0 (16.5,23.9)	21.3 (17.8,25.2)	20.9 (17.9,24.3)	20.8 (17.9,24.1)	20.3 (17.7,23.2)	19.5 (16.8,22.3)	18.9 (16.4,21.8)	18.6 (15.9,21.5)	19.8 (16.7,23.0)	19.1 (15.9,22.6)	19.3 (15.9,23.1)	19.3 (15.7,23.2)	18.6 (15.0,22.4)	-1.0 (-2.9,0.7)
Clayton County, GA	Male	27.9 (24.4,31.7)	27.0 (23.8,30.7)	26.4 (23.2,30.0)	24.9 (21.9,28.4)	22.8 (20.0,26.1)	22.9 (20.1,26.0)	22.2 (19.9,24.9)	21.8 (19.5,24.3)	20.9 (18.9,23.2)	20.5 (18.1,23.0)	19.9 (17.8,22.2)	19.2 (17.0,21.7)	19.6 (17.1,22.2)	19.1 (16.4,22.0)	19.2 (15.6,22.9)	19.1 (15.9,22.5)	18.4 (15.3,21.7)	-2.6 (-4.0,-1.2)
	Female	16.6 (13.1,20.6)	16.3 (13.3,19.8)	16.1 (13.3,19.2)	17.2 (14.6,20.2)	17.2 (14.9,19.9)	18.5 (16.4,20.8)	17.5 (15.8,19.5)	17.3 (15.6,19.1)	16.0 (14.7,17.6)	15.3 (13.9,16.9)	13.5 (12.0,15.0)	12.8 (11.0,14.7)	12.4 (10.3,14.7)	11.9 (9.3,14.7)	11.2 (8.7,14.0)	11.4 (9.2,13.9)	11.0 (8.9,13.4)	-2.6 (-4.4,-0.6)
	Both	22.1 (18.7,25.9)	21.6 (18.4,25.0)	21.1 (18.2,24.5)	21.0 (18.2,24.2)	20.0 (17.4,22.9)	20.6 (18.3,23.4)	19.8 (17.8,22.1)	19.5 (17.5,21.6)	18.4 (16.7,20.3)	17.8 (16.2,19.8)	16.6 (14.9,18.5)	15.9 (14.0,18.0)	15.9 (13.8,18.2)	15.4 (13.1,17.9)	15.1 (12.8,17.8)	15.2 (12.5,18.1)	14.6 (12.0,17.5)	-2.6 (-4.1,-1.0)
Clinch County, GA	Male	29.9 (26.0,34.2)	29.3 (25.5,33.5)	28.9 (25.0,33.1)	28.1 (24.3,32.4)	25.7 (21.9,29.9)	27.4 (23.4,32.0)	27.3 (23.9,31.2)	27.3 (23.8,31.2)	26.8 (23.7,30.4)	26.5 (23.0,30.5)	26.1 (22.7,29.6)	25.4 (22.1,29.0)	24.5 (21.3,28.0)	24.7 (21.0,28.7)	22.8 (17.9,28.0)	22.6 (18.8,26.5)	21.6 (17.9,25.5)	-2.0 (-3.4,-0.7)
	Female	24.1 (19.1,30.6)	23.8 (19.2,29.5)	23.5 (19.3,28.5)	23.8 (19.6,28.7)	22.4 (18.3,26.9)	22.2 (18.4,26.5)	21.0 (17.7,25.1)	20.6 (17.4,24.0)	19.5 (16.8,22.5)	20.4 (17.6,23.2)	20.7 (17.8,23.7)	20.5 (17.3,24.0)	18.5 (15.2,22.1)	19.0 (14.7,23.5)	17.0 (12.9,21.4)	18.0 (14.2,22.3)	17.5 (13.8,21.6)	-2.0 (-4.0,-0.1)
	Both	26.9 (22.5,32.2)	26.5 (22.4,31.2)	26.2 (22.2,30.8)	25.9 (21.9,30.5)	24.0 (20.1,28.4)	24.7 (21.0,29.0)	24.1 (20.8,28.0)	23.9 (20.7,27.6)	23.1 (20.2,26.3)	23.4 (20.3,26.7)	23.3 (20.2,26.5)	22.9 (19.9,26.2)	21.4 (18.5,24.8)	21.8 (18.6,25.6)	19.9 (16.3,23.7)	20.3 (16.5,24.4)	19.5 (15.8,23.5)	-2.0 (-3.6,-0.5)
Cobb County, GA	Male	18.4 (16.2,21.0)	17.9 (15.6,20.3)	17.5 (15.2,19.9)	17.1 (14.9,19.5)	15.9 (13.8,18.3)	16.2 (14.0,18.5)	15.6 (13.6,17.6)	14.9 (13.0,16.8)	14.9 (13.2,16.5)	14.3 (12.4,16.1)	14.6 (13.0,16.1)	14.3 (12.6,15.8)	13.8 (12.2,15.4)	12.8 (10.9,14.6)	12.9 (10.4,15.3)	12.1 (10.1,14.1)	11.5 (9.6,13.5)	-2.9 (-4.3,-1.7)
	Female	14.1 (11.6,17.1)	13.8 (11.7,16.4)	13.6 (11.6,15.9)	14.2 (12.1,16.5)	13.2 (11.3,15.4)	12.9 (11.1,14.8)	11.9 (10.3,13.5)	11.9 (10.4,13.3)	11.3 (10.1,12.5)	11.0 (9.8,12.1)	10.9 (9.6,12.1)	10.9 (9.4,12.6)	10.8 (8.9,12.6)	11.2 (8.9,13.3)	11.3 (9.0,13.6)	11.0 (9.1,13.0)	10.5 (8.7,12.4)	-1.8 (-3.5,-0.2)
	Both	16.2 (14.0,19.0)	15.8 (13.7,18.3)	15.5 (13.4,17.8)	15.6 (13.5,17.9)	14.5 (12.6,16.8)	14.5 (12.6,16.6)	13.7 (11.9,15.5)	13.4 (11.8,14.9)	13.1 (11.6,14.5)	12.6 (11.2,14.0)	12.7 (11.3,14.0)	12.6 (11.1,14.0)	12.3 (10.7,13.9)	12.0 (10.3,13.8)	12.1 (10.4,14.0)	11.5 (9.6,13.6)	11.0 (9.2,12.9)	-2.4 (-3.9,-1.1)
Coffee County, GA	Male	27.8 (24.2,31.6)	27.2 (23.6,30.9)	26.7 (23.2,30.4)	25.9 (22.5,29.6)	24.4 (21.0,27.9)	25.2 (21.8,28.8)	25.0 (22.1,28.0)	25.2 (22.3,28.0)	24.3 (21.7,26.9)	22.9 (20.0,25.8)	22.9 (20.2,25.6)	22.5 (19.6,25.4)	22.2 (19.3,25.3)	21.2 (18.0,24.7)	21.5 (17.2,26.0)	21.4 (17.8,25.3)	20.5 (16.9,24.3)	-1.9 (-3.2,-0.5)
	Female	20.3 (15.9,25.6)	20.3 (16.1,24.9)	20.3 (16.6,24.5)	20.8 (17.3,24.7)	19.9 (16.7,23.6)	20.0 (17.1,23.0)	19.8 (17.1,22.5)	19.6 (17.3,21.9)	20.0 (17.8,22.1)	19.5 (17.3,21.8)	19.5 (17.2,22.1)	18.8 (15.8,22.1)	19.3 (15.9,23.0)	17.8 (13.7,22.3)	18.1 (14.0,22.6)	18.5 (14.9,22.7)	17.8 (14.3,21.8)	-0.8 (-2.7,1.2)
	Both	24.0 (19.9,28.6)	23.6 (20.0,27.7)	23.4 (19.9,27.2)	23.3 (19.9,27.1)	22.1 (18.8,25.8)	22.5 (19.4,25.9)	22.4 (19.6,25.2)	22.4 (19.7,24.9)	22.1 (19.7,24.4)	21.2 (18.8,23.5)	21.2 (18.7,23.8)	20.6 (18.0,23.4)	20.7 (17.8,23.8)	19.5 (16.4,23.0)	19.7 (16.5,23.4)	19.9 (16.3,24.0)	19.1 (15.6,23.1)	-1.4 (-3.0,0.2)
Colquitt County, GA	Male	27.7 (23.9,31.9)	27.0 (23.3,31.2)	26.5 (23.0,30.7)	26.2 (22.7,30.3)	24.5 (21.0,28.4)	25.7 (22.0,29.9)	25.3 (22.2,28.7)	25.4 (22.4,28.7)	24.3 (21.5,27.3)	23.5 (20.2,26.8)	23.5 (20.5,26.5)	22.1 (19.2,25.3)	22.4 (19.5,25.7)	21.5 (18.0,25.1)	21.0 (16.5,25.8)	20.3 (16.8,24.1)	19.3 (16.0,23.2)	-2.2 (-3.8,-0.9)
	Female	21.6 (17.0,27.4)	21.3 (17.2,26.5)	21.0 (17.1,25.8)	20.5 (16.9,25.1)	18.5 (15.2,22.5)	19.5 (16.5,22.8)	19.4 (16.8,22.5)	19.8 (17.3,22.6)	19.0 (16.7,21.4)	18.9 (16.7,21.4)	18.8 (16.5,21.6)	19.5 (16.5,22.8)	19.8 (16.4,23.4)	19.1 (14.8,23.2)	20.0 (15.8,24.3)	17.6 (14.1,21.6)	16.9 (13.6,20.8)	-1.5 (-3.6,0.4)
	Both	24.6 (20.6,29.7)	24.1 (20.2,28.7)	23.7 (20.0,28.1)	23.3 (19.7,27.8)	21.4 (18.0,25.4)	22.5 (19.3,26.2)	22.3 (19.4,25.5)	22.6 (19.9,25.6)	21.6 (19.1,24.3)	21.2 (18.6,23.8)	21.1 (18.5,24.0)	20.8 (18.2,23.8)	21.1 (18.2,24.4)	20.2 (17.1,23.8)	20.5 (17.1,24.2)	18.9 (15.4,22.8)	18.1 (14.8,22.0)	-1.9 (-3.7,-0.3)
Columbia County, GA	Male	22.0 (18.8,25.5)	21.3 (18.2,24.7)	20.7 (17.7,24.0)	19.5 (16.6,22.8)	17.3 (14.5,20.4)	18.8 (15.9,22.0)	18.1 (15.6,20.6)	18.6 (16.2,21.0)	17.6 (15.6,19.9)	18.1 (15.8,20.6)	17.1 (15.1,19.4)	16.6 (14.6,18.8)	16.2 (14.2,18.5)	15.0 (12.8,17.5)	14.0 (11.2,17.2)	14.0 (11.6,16.6)	13.4 (11.0,16.0)	-3.1 (-4.7,-1.5)
	Female	15.3 (11.9,19.5)	15.0 (11.9,18.7)	14.8 (11.8,18.1)	14.5 (11.7,17.7)	14.0 (11.4,17.1)	15.9 (13.4,18.6)	16.0 (13.7,18.6)	16.1 (14.1,18.5)	15.4 (13.6,17.4)	15.3 (13.7,17.2)	14.5 (12.8,16.4)	13.9 (11.8,16.5)	13.4 (11.0,16.2)	13.5 (10.5,16.7)	12.7 (9.7,15.9)	12.2 (9.8,15.0)	11.7 (9.4,14.3)	-1.7 (-3.8,0.4)
	Both	18.6 (15.4,22.3)	18.1 (15.1,21.6)	17.7 (14.8,21.1)	17.0 (14.1,20.2)	15.7 (12.9,18.6)	17.3 (14.6,20.3)	17.0 (14.7,19.5)	17.3 (15.1,19.7)	16.5 (14.6,18.6)	16.7 (14.8,18.8)	15.8 (14.0,17.8)	15.2 (13.4,17.3)	14.8 (12.7,17.2)	14.2 (12.0,16.7)	13.3 (11.0,15.8)	13.1 (10.7,15.8)	12.5 (10.2,15.1)	-2.5 (-4.2,-0.7)
Cook County, GA	Male	29.9 (25.8,33.9)	29.3 (25.2,33.1)	28.8 (24.7,32.5)	27.7 (23.6,31.4)	26.5 (22.6,30.3)	27.9 (23.7,31.8)	27.2 (23.8,30.5)	27.2 (23.9,30.6)	26.6 (23.6,29.9)	25.5 (21.9,29.0)	25.1 (22.1,28.4)	24.6 (21.6,27.9)	23.5 (20.5,26.8)	23.3 (19.9,27.0)	22.0 (17.4,27.0)	21.4 (17.8,25.4)	20.5 (17.0,24.5)	-2.3 (-3.8,-0.8)
	Female	22.3 (17.3,27.9)	22.1 (17.5,26.9)	21.9 (17.6,26.2)	22.3 (18.1,26.5)	19.7 (15.9,23.4)	20.2 (16.9,23.7)	20.2 (17.0,23.5)	20.3 (17.4,23.4)	19.7 (17.0,22.5)	19.8 (17.1,22.6)	19.4 (16.7,22.4)	19.7 (16.2,23.5)	20.3 (16.5,24.6)	19.8 (15.4,25.0)	21.2 (16.6,26.4)	19.8 (15.9,24.2)	19.0 (15.3,23.3)	-1.0 (-3.0,1.2)
	Both	26.0 (21.5,30.7)	25.6 (21.4,29.8)	25.3 (21.1,29.3)	25.0 (20.8,28.8)	23.0 (19.1,26.7)	24.0 (20.3,27.5)	23.6 (20.4,27.0)	23.7 (20.6,27.0)	23.1 (20.3,26.1)	22.6 (19.8,25.5)	22.2 (19.4,25.3)	22.1 (19.1,25.5)	21.9 (18.5,25.6)	21.5 (18.0,25.5)	21.6 (18.2,25.6)	20.6 (16.8,24.7)	19.8 (16.2,23.9)	-1.7 (-3.4,0.2)
Coweta County, GA	Male	23.8 (20.4,27.4)	23.3 (20.1,26.8)	22.9 (19.7,26.4)	22.9 (19.6,26.4)	21.2 (18.0,24.7)	21.5 (18.2,25.1)	20.8 (18.1,23.8)	20.1 (17.5,23.0)	19.0 (16.7,21.6)	18.4 (15.8,21.4)	18.6 (16.3,21.3)	18.1 (15.7,21.0)	17.2 (14.7,20.1)	17.4 (14.6,20.6)	18.0 (14.3,21.9)	18.1 (15.0,21.8)	17.3 (14.3,20.9)	-2.0 (-3.5,-0.4)
	Female	19.7 (15.1,24.6)	19.5 (15.5,23.9)	19.4 (15.7,23.4)	19.9 (16.4,23.9)	18.2 (15.0,21.8)	18.6 (15.7,21.9)	17.7 (15.1,20.7)	17.4 (15.0,20.2)	16.5 (14.4,18.9)	16.1 (14.1,18.5)	15.6 (13.6,18.2)	15.0 (12.5,18.1)	15.0 (12.1,18.5)	14.8 (11.3,19.0)	14.8 (11.5,19.1)	14.7 (11.7,18.6)	14.2 (11.3,17.8)	-2.1 (-4.0,0.2)
	Both	21.8 (17.7,25.8)	21.4 (17.8,25.2)	21.1 (17.7,24.9)	21.4 (18.0,25.1)	19.7 (16.5,23.3)	20.0 (16.9,23.4)	19.2 (16.5,22.2)	18.7 (16.3,21.6)	17.7 (15.5,20.2)	17.2 (15.1,19.7)	17.1 (14.9,19.7)	16.5 (14.3,19.2)	16.1 (13.7,19.1)	16.1 (13.4,19.4)	16.4 (13.4,19.8)	16.4 (13.3,20.2)	15.7 (12.8,19.4)	-2.0 (-3.7,-0.2)
Crawford County, GA	Male	28.0 (24.2,32.2)	27.4 (23.7,31.6)	26.9 (23.2,31.2)	26.3 (22.7,30.6)	24.4 (20.8,28.8)	25.6 (21.7,30.0)	24.8 (21.5,28.7)	24.7 (21.5,28.4)	23.3 (20.5,26.6)	22.8 (19.7,26.4)	21.6 (18.9,24.9)	21.4 (18.6,24.8)	20.9 (18.0,24.3)	21.9 (18.6,25.7)	21.1 (16.8,26.2)	21.2 (17.7,25.4)	20.3 (16.9,24.4)	-2.0 (-3.4,-0.6)
	Female	19.8 (15.4,24.9)	19.7 (15.7,24.4)	19.7 (16.0,24.2)	21.0 (17.2,25.7)	20.3 (16.6,24.9)	20.9 (17.3,25.2)	21.6 (18.2,25.7)	22.0 (18.8,25.9)	20.9 (18.2,24.1)	21.5 (18.9,24.8)	21.2 (18.6,24.5)	20.4 (17.4,24.2)	19.6 (16.2,23.8)	20.3 (16.1,25.3)	18.1 (14.0,23.1)	17.2 (13.7,21.8)	16.6 (13.3,21.0)	-1.1 (-3.1,1.1)
[truncated: 8,134 more rows]
